# Supplementary material
Source: MDPI journal article supplement (https://www.mdpi.com/2073-4395/10/10/1512)
Supplement: s1 [file s1]

# LSD analysis for AE.1 per accessions

Method: 95.0 percentage LSD

| <i>accessions</i> | <i>Cases</i> | <i>Mean</i> | <i>Homogeneous groups</i> |
|-------------------|--------------|-------------|---------------------------|
| Tibish-Ksud       | 3            | 750.0       | XX                        |
| Can-SemUSA        | 2            | 750.0       | XXX                       |
| Ag-TendSud        | 3            | 750.0       | XX                        |
| Flex-Co20Ind      | 3            | 750.0       | XX                        |
| Ac-SRKSLan        | 3            | 779.333     | XX                        |
| Flex-AryaInd      | 3            | 786.333     | XX                        |
| Ac-TGR1551Zimb    | 3            | 788.333     | XX                        |
| chate-Carlta      | 1            | 811.0       | XXXXXXX                   |
| Ac-SVInd          | 2            | 814.5       | XXX                       |
| In-TeNinvSp       | 2            | 823.0       | XXX                       |
| Ag-CallInd        | 3            | 827.667     | XX                        |
| In-TDewUSA        | 3            | 841.333     | XX                        |
| Con-ShiroJa       | 3            | 848.333     | XX                        |
| Ag-WChInd         | 3            | 866.333     | XX                        |
| Con-FreeCJa       | 3            | 876.667     | XX                        |
| Am-TokTaj         | 3            | 898.667     | XX                        |
| Dud-QPMAfg        | 3            | 903.333     | XX                        |
| In-CrabPor        | 2            | 912.0       | XXX                       |
| Chi-VellInd       | 3            | 925.667     | XX                        |
| In-HoneyDewUSA    | 3            | 935.0       | XX                        |
| In-PsPiñSp        | 3            | 937.333     | XX                        |
| La-KroFran        | 4            | 941.5       | X                         |
| Can-NCFran        | 2            | 996.5       | XXX                       |
| In-CGBUSA         | 3            | 997.667     | XX                        |
| In-BBredSp        | 3            | 1003.33     | XX                        |
| In-AmAoroSp       | 2            | 1091.0      | XXX                       |
| In-TeNinvSp2      | 2            | 1536.5      | XXXX                      |
| In-AmCañSp        | 3            | 1544.33     | XX                        |
| Can-GCHUSA        | 3            | 1651.67     | XX                        |
| Ag-15591Gha       | 3            | 4393.67     | XX                        |
| La-ErizoSp        | 3            | 5512.67     | XXX                       |
| In-LaBolasSp      | 3            | 9247.33     | XXX                       |
| Am-korcaRus       | 3            | 10578.0     | XXXX                      |
| Am-KizilUzbe      | 3            | 10701.0     | XXXX                      |
| Can-EanaHun       | 3            | 12598.7     | XXXX                      |
| Con-PauPol        | 3            | 12677.7     | XXXX                      |
| Flex-SnakeSA      | 3            | 12789.7     | XXXX                      |
| Ac-G22843Se       | 3            | 13506.0     | XXXX                      |
| In-BBescrSp       | 3            | 13762.0     | XXXX                      |
| Am-NesviGeor      | 3            | 15558.7     | XXXX                      |
| Mom-PII24Ind      | 3            | 15622.3     | XXXX                      |
| Am-KafEgy         | 2            | 18889.0     | XXXXX                     |
| Dud-QAPMGeorg     | 3            | 20402.7     | XXXX                      |
| Can-HBJUSA        | 3            | 20934.7     | XXXX                      |
| Can-PGRFran       | 3            | 22723.0     | XXXXX                     |
| In-RoMoch1Sp      | 3            | 25831.7     | XXXXX                     |
| Am-AnaFran        | 3            | 31178.3     | XXXXXX                    |
| In-LaEscrSp       | 2            | 33663.0     | XXXXXXXX                  |
| La-OgenBul        | 3            | 35511.0     | XXXXXXXX                  |
| Mom-MR1Ind        | 3            | 43404.0     | XXXXXXXXXX                |
| Am-HassanTur      | 3            | 43935.0     | XXXXXXXXXX                |
| Con-SCKo          | 3            | 44790.3     | XXXXXXXXXX                |
| Con-NanChi        | 3            | 47997.0     | XXXXXXXXXX                |

|              |   |         |            |
|--------------|---|---------|------------|
| Am-YokIs     | 2 | 49779.5 | XXXXXXXXXX |
| In-ComunSp   | 2 | 49907.5 | XXXXXXXXXX |
| Con-MielChi  | 3 | 60966.0 | XXXXXXXXXX |
| In-TeSp      | 3 | 70409.3 | XXXXXXXXXX |
| Can-EfJa     | 3 | 71487.3 | XXXXXXXXXX |
| Can-Ogen2Is  | 3 | 72737.3 | XXXXXXXXXX |
| Con-GMJJa    | 3 | 76485.3 | XXXXXXXXXX |
| Mom-KhaInd   | 3 | 82218.0 | XXXXXXXXXX |
| Can-WiUSA    | 3 | 87347.0 | XXXXXXX    |
| Can-DulUSA   | 3 | 98483.0 | XXXXXXX    |
| Can-TopUSA   | 3 | 107727. | XXXXXXX    |
| Can-PearlJa  | 3 | 115292. | XXXXXXX    |
| Can-NOFran   | 2 | 128251. | XXXXXX     |
| Con-BaishChi | 3 | 134148. | XXXXX      |
| La-CascaPor  | 2 | 145747. | XXX        |
| Can-VedFran  | 3 | 176571. | XXX        |
| La-ZatIta    | 3 | 185568. | XX         |
| Can-GyFran   | 2 | 244690. | X          |
| Can-SucrFran | 3 | 494739. | X          |

### LSD analysis for AE.2 per accessions

Method: 95.0 percentage LSD

| <i>accessions</i> | <i>Cases</i> | <i>Mean</i> | <i>Homogeneous groups</i> |
|-------------------|--------------|-------------|---------------------------|
| Con-FreeCJa       | 3            | 750.0       | X                         |
| Flex-AryaInd      | 3            | 750.0       | X                         |
| Ac-TGR1551Zimb    | 3            | 750.0       | X                         |
| In-PsPiñSp        | 3            | 750.0       | X                         |
| In-AmAoroSp       | 2            | 750.0       | XX                        |
| Ag-WChInd         | 3            | 750.0       | X                         |
| Ac-SRKSLan        | 3            | 750.0       | X                         |
| In-HoneyDewUSA    | 3            | 750.0       | X                         |
| Flex-Co20Ind      | 3            | 750.0       | X                         |
| In-CGBUSA         | 3            | 750.0       | X                         |
| Ac-SVIIInd        | 2            | 750.0       | XX                        |
| In-CrabPor        | 2            | 750.0       | XX                        |
| chate-Carlta      | 1            | 750.0       | XXXXXX                    |
| Tibish-Ksud       | 3            | 750.0       | X                         |
| Ag-TendSud        | 3            | 1263.0      | X                         |
| In-RoMoch1Sp      | 3            | 1452.0      | X                         |
| In-BBredSp        | 3            | 1487.67     | X                         |
| In-TeNinvSp       | 2            | 2448.5      | XX                        |
| Con-ShiroJa       | 3            | 3405.33     | X                         |
| Ag-CallInd        | 3            | 5088.67     | X                         |
| Can-SemUSA        | 2            | 7182.5      | XX X                      |
| In-TDewUSA        | 3            | 7203.33     | X                         |
| Chi-VellInd       | 3            | 8444.0      | X                         |
| Con-GMJJa         | 3            | 14799.7     | XX                        |
| Ag-15591Gha       | 3            | 15654.3     | XX                        |
| In-AmCañSp        | 3            | 16799.0     | XX X                      |
| Ac-G22843Se       | 3            | 18621.7     | XX X                      |
| In-TeNinvSp2      | 2            | 18896.0     | XXXXX                     |
| Am-TokTaj         | 3            | 19519.0     | XX X                      |
| Can-PearlJa       | 3            | 21068.0     | XX X                      |
| Can-NCFran        | 2            | 22777.0     | XXXXX                     |
| Flex-SnakeSA      | 3            | 25359.3     | XXX X                     |

|               |   |         |             |
|---------------|---|---------|-------------|
| Con-NanChi    | 3 | 28178.3 | XXX X       |
| Con-BaishChi  | 3 | 32182.3 | XXXXXX      |
| In-BBescrSp   | 3 | 44847.0 | XXXXXXX     |
| La-OgenBul    | 3 | 44884.3 | XXXXXXX     |
| Con-MielChi   | 3 | 50750.7 | XXXXXXXX    |
| Con-SCKo      | 3 | 51298.0 | XXXXXXXX    |
| Am-KizilUzbe  | 3 | 58059.3 | XXXXXXXXX   |
| Can-TopUSA    | 3 | 61401.0 | XXXXXXXXX   |
| Dud-QAPMGeorg | 3 | 64593.3 | XXXXXXXXX   |
| Can-EfJa      | 3 | 65703.0 | XXXXXXXXX   |
| Dud-QPMAfg    | 3 | 70648.0 | XXXXXXXXX   |
| Can-EanaHun   | 3 | 76731.3 | XXXXXXXXX   |
| Mom-PII24Ind  | 3 | 77448.7 | XXXXXXXXX   |
| In-TeSp       | 3 | 86179.3 | XXXXXXXXX   |
| Can-HBJUSA    | 3 | 89692.7 | XXXXXXXXX   |
| Am-KafEgy     | 2 | 90524.0 | XXXXXXXXXXX |
| Con-PauPol    | 3 | 93020.0 | XXXXXXXXXXX |
| Am-AnaFran    | 3 | 98106.3 | XXXXXXXXXXX |
| In-LaEscrSp   | 2 | 99086.5 | XXXXXXXXXXX |
| Can-Ogen2Is   | 3 | 102139. | XXXXXXXXXXX |
| Can-GCHUSA    | 3 | 121071. | XXXXXXXXXXX |
| La-KroFran    | 4 | 126005. | XX XXXXXXX  |
| La-ErizoSp    | 3 | 139982. | X XXXXXXXX  |
| Can-NOFran    | 2 | 140528. | XXXXXXXXXXX |
| Am-YokIs      | 2 | 147601. | XX XXXXXXX  |
| Can-PGRFran   | 3 | 151863. | XXXXXXXXX   |
| Am-NesviGeor  | 3 | 152333. | XXXXXXXXX   |
| Am-HassanTur  | 3 | 152915. | XXXXXXXXX   |
| Mom-KhaInd    | 3 | 160771. | XXXXXXX     |
| In-LaBolasSp  | 3 | 161668. | XXXXXXX     |
| Mom-MR1Ind    | 3 | 167459. | XXXXXX      |
| Can-VedFran   | 3 | 184322. | XXXXX       |
| In-ComunSp    | 2 | 201394. | XXXX        |
| Can-DulUSA    | 3 | 210904. | XXX         |
| Am-korcaRus   | 3 | 216478. | XX          |
| La-ZatIta     | 3 | 237861. | X           |
| Can-GyFran    | 2 | 391871. | X           |
| Can-SucrFran  | 3 | 417823. | X           |
| Can-WiUSA     | 3 | 421440. | X           |
| La-CascaPor   | 2 | 472333. | X           |

#### LSD analysis for AE.3 per accessions

Method: 95.0 percentage LSD

| <i>accessions</i> | <i>Cases</i> | <i>Mean</i> | <i>Homogeneous groups</i> |
|-------------------|--------------|-------------|---------------------------|
| Ac-SRKSLan        | 3            | 750.0       | X                         |
| In-RoMoch1Sp      | 3            | 750.0       | X                         |
| chate-CarIta      | 1            | 750.0       | XXXXX                     |
| Flex-AryaInd      | 3            | 789.0       | X                         |
| In-PsPiñSp        | 3            | 816.667     | X                         |
| In-CGBUSA         | 3            | 1215.33     | X                         |
| Tibish-Ksud       | 3            | 3064.33     | X                         |
| Ag-TendSud        | 3            | 3374.33     | X                         |
| Flex-Co20Ind      | 3            | 4009.67     | X                         |
| Ag-WChInd         | 3            | 5229.0      | X                         |
| In-AmAoroSp       | 2            | 5559.0      | XX                        |

|                |   |           |            |
|----------------|---|-----------|------------|
| Ac-TGR1551Zimb | 3 | 6513.33   | X          |
| Ac-SVInd       | 2 | 7775.0    | XX         |
| Con-FreeCJa    | 3 | 8469.33   | X          |
| In-HoneyDewUSA | 3 | 10914.0   | X          |
| In-CrabPor     | 2 | 13132.0   | XX         |
| Con-ShiroJa    | 3 | 13927.0   | X          |
| Ag-15591Gha    | 3 | 21224.3   | X          |
| Con-GMJJa      | 3 | 22789.3   | X          |
| Ag-CallInd     | 3 | 29789.7   | X          |
| Flex-SnakeSA   | 3 | 30097.7   | X          |
| In-TeNinvSp    | 2 | 31281.0   | XXX        |
| In-BBredSp     | 3 | 39979.0   | XX         |
| Can-NCFran     | 2 | 48109.0   | XXX        |
| Chi-VellInd    | 3 | 56932.3   | XX         |
| In-TDewUSA     | 3 | 80568.0   | XX         |
| Ac-G22843Se    | 3 | 83630.7   | XX         |
| Con-BaishChi   | 3 | 97947.7   | XX         |
| Con-MielChi    | 3 | 120087.   | XXX        |
| In-AmCañSp     | 3 | 139666.   | XXX        |
| Mom-KhaInd     | 3 | 146911.   | XXX        |
| Con-NanChi     | 3 | 153276.   | XXX        |
| Am-TokTaj      | 3 | 203411.   | XXX        |
| Can-PearlJa    | 3 | 265279.   | XXX        |
| Mom-MR1Ind     | 3 | 309218.   | XXXX       |
| Mom-PII24Ind   | 3 | 309299.   | XXXX       |
| Dud-QPMAfg     | 3 | 313381.   | XXXX       |
| Can-EanaHun    | 3 | 352742.   | XXXXXX     |
| In-TeSp        | 3 | 356725.   | XXXXXX     |
| In-LaEscrSp    | 2 | 380851.   | XXXXXX     |
| Con-SCKo       | 3 | 409282.   | XXXXXX     |
| Am-KizilUzbe   | 3 | 448575.   | XXXXXX     |
| Can-SemUSA     | 2 | 576545.   | XXXXXXXX   |
| In-TeNinvSp2   | 2 | 608402.   | XXXXXXXX   |
| Am-KafEgy      | 2 | 614491.   | XXXXXXXX   |
| La-ZatIta      | 3 | 629923.   | XXXXXXXX   |
| Can-SucrFran   | 3 | 661586.   | XXXXXXXX   |
| In-BBescrSp    | 3 | 691407.   | XXXXXXXX   |
| Am-HassanTur   | 3 | 701915.   | XXXXXXXX   |
| La-OgenBul     | 3 | 762557.   | XXXXXXXX   |
| Can-TopUSA     | 3 | 788051.   | XXXXXXXX   |
| Dud-QAPMGeorg  | 3 | 829040.   | XXXXXXXX   |
| Can-NOFran     | 2 | 831044.   | XXXXXXXXXX |
| Can-PGRFran    | 3 | 886109.   | XXXXXXXXXX |
| Con-PauPol     | 3 | 963416.   | XXXXXXXX   |
| Can-Ogen2Is    | 3 | 1.14672E6 | XXXXXXXX   |
| In-LaBolasSp   | 3 | 1.19179E6 | XXXXXXXX   |
| Can-EfJa       | 3 | 1.19531E6 | XXXXXXXX   |
| Can-VedFran    | 3 | 1.45465E6 | XXXXXXXX   |
| Am-AnaFran     | 3 | 1.47808E6 | XXXXXX     |
| Can-GyFran     | 2 | 1.57897E6 | XXXXXX     |
| Can-WiUSA      | 3 | 1.6483E6  | XXXXXX     |
| Am-NesviGeor   | 3 | 1.70366E6 | XXXX       |
| Am-YokIs       | 2 | 1.78436E6 | XXXX       |
| La-KroFran     | 4 | 1.87327E6 | XXXX       |
| Can-GCHUSA     | 3 | 1.89834E6 | XXXX       |
| Can-HBJUSA     | 3 | 2.01225E6 | XXX        |
| La-ErizoSp     | 3 | 2.15697E6 | XX         |

|             |   |           |    |
|-------------|---|-----------|----|
| Can-DulUSA  | 3 | 2.18142E6 | XX |
| Am-korcaRus | 3 | 2.24937E6 | XX |
| In-ComunSp  | 2 | 2.31439E6 | XX |
| La-CascaPor | 2 | 2.68141E6 | X  |

#### LSD analysis for AE.4 per accessions

Method: 95.0 percentage LSD

| <i>accessions</i> | <i>Cases</i> | <i>Mean</i> | <i>Homogeneous groups</i> |
|-------------------|--------------|-------------|---------------------------|
| Ac-SRKSLan        | 3            | 750.0       | X                         |
| Flex-AryaInd      | 3            | 750.0       | X                         |
| chate-Carlta      | 1            | 750.0       | XXXXXXXXXX                |
| Tibish-Ksud       | 3            | 750.0       | X                         |
| Ac-TGR1551Zimb    | 3            | 750.0       | X                         |
| In-CGBUSA         | 3            | 750.0       | X                         |
| In-RoMoch1Sp      | 3            | 750.0       | X                         |
| Ag-WChInd         | 3            | 750.0       | X                         |
| In-PsPiñSp        | 3            | 750.0       | X                         |
| Flex-Co20Ind      | 3            | 1186.0      | X                         |
| Ac-SV1Ind         | 2            | 1447.0      | XX XX                     |
| Ag-TendSud        | 3            | 1489.0      | X                         |
| In-CrabPor        | 2            | 1681.5      | XX XX                     |
| Con-FreeCJa       | 3            | 1846.0      | X                         |
| In-HoneyDewUSA    | 3            | 2093.0      | X                         |
| In-BBredSp        | 3            | 2217.0      | X                         |
| In-AmCañSp        | 3            | 2716.33     | X                         |
| In-AmAoroSp       | 2            | 2950.5      | XX XX                     |
| Con-GMJJa         | 3            | 4143.33     | X                         |
| Con-ShiroJa       | 3            | 6472.67     | X                         |
| Ag-15591Gha       | 3            | 7268.33     | XX                        |
| Ag-CallInd        | 3            | 8808.67     | XX X                      |
| Chi-VellInd       | 3            | 8944.0      | XX X                      |
| In-TeNinvSp       | 2            | 10330.0     | XXXXXX                    |
| In-TDewUSA        | 3            | 13230.7     | XX X                      |
| Con-BaishChi      | 3            | 13812.0     | XX X                      |
| Can-PearlJa       | 3            | 14845.3     | XX X                      |
| Can-SemUSA        | 2            | 17809.0     | XXXXXX                    |
| Ac-G22843Se       | 3            | 24167.7     | XX XX                     |
| Flex-SnakeSA      | 3            | 28299.0     | XX XX                     |
| Can-NCFran        | 2            | 37395.0     | XXXXXX                    |
| Con-MielChi       | 3            | 47440.7     | XX XX                     |
| Am-TokTaj         | 3            | 48106.7     | XX XX                     |
| In-TeNinvSp2      | 2            | 61737.0     | XXXXXX                    |
| Dud-QPMAfg        | 3            | 93498.0     | XXXXXX                    |
| In-BBescrSp       | 3            | 96173.0     | XXXXXX                    |
| Can-HBJUSA        | 3            | 115041.     | XXXXXX                    |
| Con-NanChi        | 3            | 118495.     | XXXXXX                    |
| Con-SCKo          | 3            | 123022.     | XXXXXX                    |
| Mom-KhaInd        | 3            | 130693.     | XXXXXX                    |
| Mom-PII24Ind      | 3            | 146069.     | XXXXXX                    |
| Can-TopUSA        | 3            | 146321.     | XXXXXX                    |
| Am-KizilUzbe      | 3            | 158854.     | XXXXXXXXXX                |
| Can-EanaHun       | 3            | 173560.     | XXXXXXXXXX                |
| In-LaEscrSp       | 2            | 182260.     | XXXXXXXXXXXX              |
| In-TeSp           | 3            | 186326.     | XXXXXXXXXXXX              |
| Dud-QAPMGeorg     | 3            | 236325.     | XXXXXXXXXXXX              |
| Am-YokIs          | 2            | 236994.     | XXXXXXXXXXXX              |

|              |   |           |              |
|--------------|---|-----------|--------------|
| La-OgenBul   | 3 | 240943.   | XXXXXXXXXXXX |
| La-ErizoSp   | 3 | 286511.   | XXXXXXXXXXXX |
| Can-SucrFran | 3 | 303003.   | XXXXXXXXXXXX |
| Am-HassanTur | 3 | 384472.   | XXXXXXXXXXXX |
| Mom-MRIInd   | 3 | 427391.   | X XXXXXXXXX  |
| Am-KafEgy    | 2 | 430013.   | XXXXXXXXXXXX |
| Can-NOFran   | 2 | 446001.   | X XXXXXXXXX  |
| Can-EfJa     | 3 | 452471.   | XXXXXXXXXXXX |
| La-ZatIta    | 3 | 468803.   | XXXXXXXXXX   |
| Can-VedFran  | 3 | 511866.   | XXXXXXXXXX   |
| Am-korcaRus  | 3 | 536191.   | XXXXXXXXXX   |
| Con-PauPol   | 3 | 561329.   | XXXXXX       |
| Am-NesviGeor | 3 | 562306.   | XXXXXX       |
| Can-Ogen2Is  | 3 | 578283.   | XXXXXX       |
| Can-GCHUSA   | 3 | 704153.   | XXXXXX       |
| La-KroFran   | 4 | 733370.   | XXXXXX       |
| Am-AnaFran   | 3 | 737835.   | XXXXXX       |
| Can-DulUSA   | 3 | 763074.   | XXXX         |
| Can-WiUSA    | 3 | 815714.   | XXX          |
| In-LaBolasSp | 3 | 818315.   | XXX          |
| Can-GyFran   | 2 | 869255.   | XXX          |
| Can-PGRFran  | 3 | 870508.   | XX           |
| In-ComunSp   | 2 | 993523.   | XX           |
| La-CascaPor  | 2 | 1.45257E6 | X            |

#### LSD analysis for AE.5 per accessions

Method: 95.0 percentage LSD

| <i>accessions</i> | <i>Cases</i> | <i>Mean</i> | <i>Homogeneous groups</i> |
|-------------------|--------------|-------------|---------------------------|
| Ac-SRKSLan        | 3            | 750.0       | X                         |
| Con-FreeCJa       | 3            | 750.0       | X                         |
| Flex-AryaInd      | 3            | 750.0       | X                         |
| Ac-TGR1551Zimb    | 3            | 750.0       | X                         |
| Ag-CallInd        | 3            | 750.0       | X                         |
| In-CrabPor        | 2            | 750.0       | XX                        |
| In-BBredSp        | 3            | 750.0       | X                         |
| In-RoMoch1Sp      | 3            | 750.0       | X                         |
| In-CGBUSA         | 3            | 750.0       | X                         |
| Tibish-Ksud       | 3            | 750.0       | X                         |
| Con-ShiroJa       | 3            | 750.0       | X                         |
| Ac-SVIInd         | 2            | 750.0       | XX                        |
| In-PsPiñSp        | 3            | 750.0       | X                         |
| Ag-WChInd         | 3            | 750.0       | X                         |
| Flex-Co20Ind      | 3            | 750.0       | X                         |
| chate-CarIta      | 1            | 750.0       | XXXX                      |
| In-HoneyDewUSA    | 3            | 750.0       | X                         |
| In-AmAoroSp       | 2            | 1600.0      | XX                        |
| In-AmCañSp        | 3            | 2646.0      | X                         |
| Con-BaishChi      | 3            | 2657.67     | X                         |
| In-TDewUSA        | 3            | 2766.67     | X                         |
| Chi-VellInd       | 3            | 5016.0      | X                         |
| Ag-TendSud        | 3            | 5230.33     | X                         |
| Flex-SnakeSA      | 3            | 9504.67     | X                         |
| In-TeNinvSp       | 2            | 12376.5     | XX                        |
| Can-PearlJa       | 3            | 16356.3     | XX                        |
| Can-NCFran        | 2            | 18543.0     | XX                        |

|               |   |           |            |
|---------------|---|-----------|------------|
| Can-EanaHun   | 3 | 18686.7   | XX         |
| Ac-G22843Se   | 3 | 25694.3   | XX         |
| Con-GMJJa     | 3 | 25881.0   | XX         |
| Con-NanChi    | 3 | 28832.0   | XX         |
| Can-SemUSA    | 2 | 30909.0   | XXX        |
| Am-YokIs      | 2 | 36379.0   | XXXX       |
| Con-MielChi   | 3 | 36624.0   | XX         |
| Am-TokTaj     | 3 | 37236.7   | XX         |
| Con-SCKo      | 3 | 38270.0   | XX         |
| In-TeSp       | 3 | 39174.7   | XX         |
| Ag-15591Gha   | 3 | 40546.0   | XX         |
| Am-KizilUzbe  | 3 | 43381.0   | XX         |
| In-TeNinvSp2  | 2 | 45471.5   | XXXX       |
| Mom-PII24Ind  | 3 | 46725.0   | XX         |
| La-OgenBul    | 3 | 48561.0   | XX         |
| Can-Ogen2Is   | 3 | 60452.3   | XXX        |
| Am-KafEgy     | 2 | 63965.0   | XXXX       |
| Dud-QAPMGeorg | 3 | 64385.0   | XXXX       |
| Dud-QPMafg    | 3 | 67487.3   | XXXX       |
| Can-TopUSA    | 3 | 82240.7   | XXXX       |
| Mom-MR1Ind    | 3 | 100741.   | XXXX       |
| In-BBescrSp   | 3 | 106068.   | XXXX       |
| Can-HBJUSA    | 3 | 116657.   | XXXX       |
| Am-HassanTur  | 3 | 131521.   | XXXXXX     |
| Can-DulUSA    | 3 | 132379.   | XXXXXX     |
| Can-EfJa      | 3 | 156205.   | XXXXXX     |
| In-LaEscrSp   | 2 | 158148.   | XXXXXXXX   |
| In-LaBolasSp  | 3 | 159874.   | XXXXXX     |
| Can-WiUSA     | 3 | 183278.   | XXXXXX     |
| Am-NesviGeor  | 3 | 188773.   | XXXXXXX    |
| In-ComunSp    | 2 | 192583.   | XXXXXXX    |
| Am-korcaRus   | 3 | 260373.   | XXXXXXXX   |
| Can-NOFran    | 2 | 264124.   | XXXXXXXXXX |
| Mom-KhaInd    | 3 | 270741.   | XXXXXXXXXX |
| La-ErizoSp    | 3 | 315103.   | XXXXXXXX   |
| La-ZatIta     | 3 | 323807.   | XXXXXX     |
| Con-PauPol    | 3 | 379030.   | XXXX       |
| Can-VedFran   | 3 | 446809.   | XXXX       |
| Can-GCHUSA    | 3 | 491673.   | XXXX       |
| Can-SucrFran  | 3 | 526913.   | XXX        |
| Can-PGRFran   | 3 | 640881.   | XXX        |
| La-KroFran    | 4 | 724659.   | XX         |
| Am-AnaFran    | 3 | 873749.   | X          |
| Can-GyFran    | 2 | 1.34288E6 | X          |
| La-CascaPor   | 2 | 3.09681E6 | X          |

#### LSD analysis for AE.6 per accessions

Method: 95.0 percentage LSD

| <i>accessions</i> | <i>Cases</i> | <i>Mean</i> | <i>Homogeneous groups</i> |
|-------------------|--------------|-------------|---------------------------|
| In-PsPiñSp        | 3            | 750.0       | X                         |
| Tibish-Ksud       | 3            | 750.0       | X                         |
| Flex-AryaInd      | 3            | 750.0       | X                         |
| Ag-WChInd         | 3            | 750.0       | X                         |
| Con-ShiroJa       | 3            | 750.0       | X                         |
| chate-CarIta      | 1            | 750.0       | XXXXXX                    |
| Ac-SVIInd         | 2            | 750.0       | X X                       |

|                |   |           |            |
|----------------|---|-----------|------------|
| Ac-SRKSLan     | 3 | 750.0     | X          |
| In-RoMoch1Sp   | 3 | 750.0     | X          |
| In-CGBUSA      | 3 | 750.0     | X          |
| Ac-TGR1551Zimb | 3 | 1612.33   | X          |
| In-CrabPor     | 2 | 1783.0    | X X        |
| Con-FreeCJa    | 3 | 2045.0    | X          |
| In-AmAoroSp    | 2 | 2257.5    | X X        |
| Flex-Co20Ind   | 3 | 2514.67   | X          |
| In-BBredSp     | 3 | 3224.33   | X          |
| In-HoneyDewUSA | 3 | 3982.67   | X          |
| Con-GMJJa      | 3 | 8519.0    | X          |
| Ag-TendSud     | 3 | 12645.3   | X          |
| In-AmCañSp     | 3 | 12968.7   | X          |
| Con-BaishChi   | 3 | 14233.3   | X          |
| Ag-CallInd     | 3 | 18098.3   | X          |
| Can-NCFran     | 2 | 26986.0   | XX X       |
| In-TeNinvSp    | 2 | 31614.5   | XX X       |
| Chi-VellInd    | 3 | 37713.0   | X X        |
| Flex-SnakeSA   | 3 | 38169.3   | X X        |
| In-TDewUSA     | 3 | 56918.3   | X X        |
| Ag-15591Gha    | 3 | 72552.0   | X X        |
| Con-MielChi    | 3 | 73962.3   | X X        |
| Con-NanChi     | 3 | 97228.0   | XXXX       |
| Con-SCKo       | 3 | 138340.   | XXXXXX     |
| Can-PearlJa    | 3 | 145863.   | XXXXXX     |
| Dud-QPMAfg     | 3 | 150951.   | XXXXXX     |
| Ac-G22843Se    | 3 | 157239.   | XXXXXX     |
| Can-EanaHun    | 3 | 189860.   | XXXXXX     |
| Mom-KhaInd     | 3 | 196894.   | XXXXXX     |
| In-LaEscrSp    | 2 | 257136.   | XXXXXXXX   |
| Can-SemUSA     | 2 | 311863.   | XXXXXXXX   |
| Am-TokTaj      | 3 | 319060.   | XXXXXXXX   |
| Mom-PII24Ind   | 3 | 357131.   | XXXXXXXX   |
| Can-TopUSA     | 3 | 372528.   | XXXXXXXX   |
| Con-PauPol     | 3 | 380078.   | XXXXXXXX   |
| In-TeNinvSp2   | 2 | 385603.   | XXXXXXXXXX |
| Am-KizilUzbe   | 3 | 401466.   | XXXXXXXXXX |
| In-BBescrSp    | 3 | 402769.   | XXXXXXXXXX |
| La-ZatIta      | 3 | 433860.   | XXXXXXXXXX |
| Dud-QAPMGeorg  | 3 | 439978.   | XXXXXXXXXX |
| Can-HBJUSA     | 3 | 531327.   | XX XXXXXX  |
| Can-SucrFran   | 3 | 541799.   | X XXXXXX   |
| Am-KafEgy      | 2 | 543445.   | XXXXXXXXXX |
| Mom-MR1Ind     | 3 | 570815.   | XXXXXX     |
| In-TeSp        | 3 | 576891.   | XXXXXX     |
| La-OgenBul     | 3 | 654863.   | XXXXXX     |
| Can-Ogen2Is    | 3 | 667407.   | XXXXXXXX   |
| Can-NOFran     | 2 | 807612.   | XXXXXXXXXX |
| Am-YokIs       | 2 | 815557.   | XXXXXXXX   |
| Am-HassanTur   | 3 | 837481.   | XXXXXX     |
| Can-PGRFran    | 3 | 869868.   | XXXXXX     |
| Can-VedFran    | 3 | 940451.   | XXXXXX     |
| Am-AnaFran     | 3 | 947663.   | XXXXXX     |
| Can-EfJa       | 3 | 969247.   | XXXXXX     |
| Can-GyFran     | 2 | 976015.   | XXXXXX     |
| La-KroFran     | 4 | 1.01255E6 | XXXXX      |
| In-LaBolasSp   | 3 | 1.06456E6 | XXXXX      |



|              |   |           |      |
|--------------|---|-----------|------|
| La-ErizoSp   | 3 | 1.10928E6 | XXXX |
| Am-korcaRus  | 3 | 1.11011E6 | XXXX |
| Am-NesviGeor | 3 | 1.1395E6  | XXX  |
| Can-GCHUSA   | 3 | 1.22854E6 | XXX  |
| Can-WiUSA    | 3 | 1.28059E6 | XXX  |
| Can-DulUSA   | 3 | 1.32829E6 | XX   |
| La-CascaPor  | 2 | 1.39603E6 | XX   |
| In-ComunSp   | 2 | 1.54365E6 | X    |

#### LSD analysis for AE.7 per accessions

Method: 95.0 percentage LSD

| <i>accessions</i> | <i>Cases</i> | <i>Mean</i> | <i>Homogeneous groups</i> |
|-------------------|--------------|-------------|---------------------------|
| In-RoMoch1Sp      | 3            | 750.0       | X                         |
| Tibish-Ksud       | 3            | 750.0       | X                         |
| In-CrabPor        | 2            | 750.0       | XXX                       |
| Flex-Co20Ind      | 3            | 750.0       | X                         |
| In-HoneyDewUSA    | 3            | 750.0       | X                         |
| Flex-AryaInd      | 3            | 750.0       | X                         |
| In-AmCañSp        | 3            | 750.0       | X                         |
| Ac-SRKSLan        | 3            | 750.0       | X                         |
| Ac-TGR1551Zimb    | 3            | 750.0       | X                         |
| Ag-TendSud        | 3            | 750.0       | X                         |
| chate-CarIta      | 1            | 750.0       | XXXXXX                    |
| Con-ShiroJa       | 3            | 750.0       | X                         |
| In-BBredSp        | 3            | 750.0       | X                         |
| Con-GMJJa         | 3            | 750.0       | X                         |
| In-AmAoroSp       | 2            | 750.0       | XXX                       |
| Con-FreeCJa       | 3            | 1566.33     | X                         |
| In-CGBUSA         | 3            | 1598.33     | X                         |
| Ag-WChInd         | 3            | 1623.67     | X                         |
| In-PsPiñSp        | 3            | 1891.67     | X                         |
| Ag-CallInd        | 3            | 1932.67     | X                         |
| Ac-SVIIInd        | 2            | 2325.5      | XXX                       |
| Con-BaishChi      | 3            | 2617.67     | X                         |
| Chi-VellInd       | 3            | 2693.67     | X                         |
| In-TDewUSA        | 3            | 3007.0      | XX                        |
| Con-NanChi        | 3            | 8560.0      | XXX                       |
| Ac-G22843Se       | 3            | 8831.0      | XXX                       |
| Can-PearlJa       | 3            | 9883.0      | XXX                       |
| In-TeNinvSp       | 2            | 11606.0     | XXX                       |
| Dud-QPMAfg        | 3            | 12052.0     | XXX                       |
| Con-MielChi       | 3            | 12802.7     | XXX                       |
| Flex-SnakeSA      | 3            | 13562.3     | XXX                       |
| Can-SemUSA        | 2            | 15308.5     | XXXX                      |
| Con-SCKo          | 3            | 15943.3     | XXX                       |
| Can-NCFran        | 2            | 15976.5     | XXXX                      |
| Mom-KhaInd        | 3            | 16073.7     | XXX                       |
| Am-TokTaj         | 3            | 18722.0     | XXX                       |
| Ag-15591Gha       | 3            | 21768.7     | XXX                       |
| In-LaEscrSp       | 2            | 25410.5     | XXXX                      |
| Can-SucrFran      | 3            | 31827.7     | XXXX                      |
| Can-EanaHun       | 3            | 35732.0     | XXXX                      |
| In-BBescrSp       | 3            | 37025.0     | XXXX                      |
| Am-KizilUzbe      | 3            | 48701.0     | XXXXXX                    |
| Dud-QAPMGeorg     | 3            | 49453.7     | XXXXXX                    |

|              |   |         |            |
|--------------|---|---------|------------|
| In-TeNinvSp2 | 2 | 52608.0 | XXXXXX     |
| Can-HBJUSA   | 3 | 53196.0 | XXXXXX     |
| Mom-PII24Ind | 3 | 59550.7 | XXXXXX     |
| La-OgenBul   | 3 | 61072.3 | XXXXXX     |
| Con-PauPol   | 3 | 68387.3 | XXXXXXX    |
| Can-TopUSA   | 3 | 68853.0 | XXXXXXX    |
| In-TeSp      | 3 | 88278.0 | XXXXXXXX   |
| Can-Ogen2Is  | 3 | 89076.0 | XXXXXXXX   |
| Can-VedFran  | 3 | 93657.7 | XXXXXXXX   |
| La-ErizoSp   | 3 | 102010. | XXXXXXXX   |
| Am-YokIs     | 2 | 102586. | XXXXXXXXXX |
| Can-WiUSA    | 3 | 113830. | XXXXXXXXXX |
| Mom-MR1Ind   | 3 | 122493. | XXXXXXXX   |
| La-ZatIta    | 3 | 127218. | XXXXXX     |
| Am-KafEgy    | 2 | 138705. | XXXXXX     |
| Am-HassanTur | 3 | 146405. | XXXXXX     |
| Can-PGRFran  | 3 | 163130. | XXXXX      |
| In-LaBolasSp | 3 | 165824. | XXXXX      |
| Can-NOFran   | 2 | 177277. | XXXXX      |
| Am-korcaRus  | 3 | 186101. | XXX        |
| Am-NesviGeor | 3 | 191119. | XX         |
| Can-EfJa     | 3 | 202024. | XX         |
| Can-GyFran   | 2 | 216608. | XX         |
| La-KroFran   | 4 | 220745. | X          |
| Am-AnaFran   | 3 | 381198. | X          |
| La-CascaPor  | 2 | 408052. | XX         |
| In-ComunSp   | 2 | 439956. | XX         |
| Can-DulUSA   | 3 | 503491. | X          |
| Can-GCHUSA   | 3 | 528960. | X          |

#### LSD analysis for AE.8 per accessions

Method: 95.0 percentage LSD

| <i>accessions</i> | <i>Cases</i> | <i>Mean</i> | <i>Homogeneous groups</i> |
|-------------------|--------------|-------------|---------------------------|
| Con-FreeCJa       | 3            | 750.0       | X                         |
| Flex-Co20Ind      | 3            | 750.0       | X                         |
| In-BBredSp        | 3            | 750.0       | X                         |
| Tibish-Ksud       | 3            | 750.0       | X                         |
| In-HoneyDewUSA    | 3            | 750.0       | X                         |
| Ac-SRKSLan        | 3            | 750.0       | X                         |
| Con-ShiroJa       | 3            | 750.0       | X                         |
| Ag-TendSud        | 3            | 750.0       | X                         |
| Con-BaishChi      | 3            | 750.0       | X                         |
| In-CGBUSA         | 3            | 750.0       | X                         |
| In-RoMoch1Sp      | 3            | 750.0       | X                         |
| In-CrabPor        | 2            | 750.0       | X                         |
| In-PsPiñSp        | 3            | 750.0       | X                         |
| Ag-WChInd         | 3            | 750.0       | X                         |
| Flex-AryaInd      | 3            | 750.0       | X                         |
| Con-GMJJa         | 3            | 750.0       | X                         |
| Ac-TGR1551Zimb    | 3            | 750.0       | X                         |
| chate-CarIta      | 1            | 750.0       | XXXX                      |
| In-AmAoroSp       | 2            | 750.0       | X                         |
| Ac-SVIIInd        | 2            | 750.0       | X                         |
| Ag-CallInd        | 3            | 1105.33     | X                         |
| In-AmCañSp        | 3            | 1634.67     | X                         |

|               |   |         |          |
|---------------|---|---------|----------|
| Con-SCKo      | 3 | 2602.0  | X        |
| Chi-VellInd   | 3 | 2781.67 | X        |
| Con-NanChi    | 3 | 3014.33 | X        |
| Con-MielChi   | 3 | 3726.67 | X        |
| Can-PearlJa   | 3 | 4756.67 | X        |
| Can-NCFran    | 2 | 4874.0  | XX       |
| Ag-15591Gha   | 3 | 5039.33 | X        |
| In-TDewUSA    | 3 | 6253.67 | X        |
| Flex-SnakeSA  | 3 | 7126.67 | X        |
| Can-SemUSA    | 2 | 10963.0 | XXX      |
| In-LaEscrSp   | 2 | 11289.5 | XXXX     |
| In-TeNinvSp2  | 2 | 13184.5 | XXXX     |
| Ac-G22843Se   | 3 | 13193.7 | X        |
| Dud-QAPMGeorg | 3 | 13569.0 | X        |
| Can-HBJUSA    | 3 | 16207.0 | XX       |
| Con-PauPol    | 3 | 17505.0 | XX       |
| La-OgenBul    | 3 | 20527.7 | XX       |
| In-TeSp       | 3 | 24714.0 | XXXX     |
| Mom-PII24Ind  | 3 | 26164.7 | XXXX     |
| Am-KizilUzbe  | 3 | 30099.0 | XXXX     |
| Dud-QPMAfg    | 3 | 31755.3 | XXXX     |
| Can-EfJa      | 3 | 32066.7 | XXXX     |
| Can-Ogen2Is   | 3 | 32562.0 | XXXX     |
| La-Zatlta     | 3 | 34126.0 | XXXX     |
| In-TeNinvSp   | 2 | 35132.0 | XXXX     |
| In-BBescrSp   | 3 | 35629.7 | XXXX     |
| Am-TokTaj     | 3 | 38378.0 | XXXX     |
| Mom-KhaInd    | 3 | 50593.7 | XXXXXX   |
| La-ErizoSp    | 3 | 53594.0 | XXXXXX   |
| Can-TopUSA    | 3 | 55520.0 | XXXXXX   |
| Can-SucrFran  | 3 | 58810.0 | XXXXXX   |
| In-LaBolasSp  | 3 | 60113.3 | XXXXXX   |
| Can-EanaHun   | 3 | 61439.3 | XXXXXX   |
| Can-GCHUSA    | 3 | 73134.7 | XXXXXX   |
| Am-KafEgy     | 2 | 78228.5 | XXXXXXXX |
| Am-AnaFran    | 3 | 82683.3 | XXXXXXXX |
| Can-PGRFran   | 3 | 88795.7 | XXXXXXXX |
| Can-NOFran    | 2 | 92081.5 | XXXXXXXX |
| Can-DulUSA    | 3 | 110094. | XXXXXXXX |
| Am-NesviGeor  | 3 | 116058. | XXXXXXXX |
| Am-korcaRus   | 3 | 116810. | XXXXXX   |
| Can-VedFran   | 3 | 141626. | XXXXXX   |
| Can-WiUSA     | 3 | 164930. | XXXX     |
| Mom-MRIInd    | 3 | 175930. | XXX      |
| Am-YokIs      | 2 | 183183. | XXX      |
| Am-HassanTur  | 3 | 209084. | XX       |
| La-KroFran    | 4 | 215470. | X        |
| In-ComunSp    | 2 | 216998. | XX       |
| Can-GyFran    | 2 | 246251. | X        |
| La-CascaPor   | 2 | 920668. | X        |

#### LSD analysis for AE.9 per accessions

Method: 95.0 percentage LSD

| <i>accessions</i> | <i>Cases</i> | <i>Mean</i> | <i>Homogeneous groups</i> |
|-------------------|--------------|-------------|---------------------------|
| Ac-SVIIInd        | 2            | 9850.0      | XX                        |

|                |   |           |            |
|----------------|---|-----------|------------|
| Ac-SRKSLan     | 3 | 17373.3   | X          |
| Con-BaishChi   | 3 | 17619.0   | X          |
| Con-ShiroJa    | 3 | 19718.7   | X          |
| Ac-TGR1551Zimb | 3 | 24518.3   | X          |
| Con-GMJJa      | 3 | 29595.7   | X          |
| In-RoMoch1Sp   | 3 | 33833.7   | X          |
| In-AmAoroSp    | 2 | 38334.5   | XXX        |
| Chi-VellInd    | 3 | 43200.7   | XX         |
| In-AmCañSp     | 3 | 48613.3   | XX         |
| In-HoneyDewUSA | 3 | 51677.3   | XX         |
| In-CrabPor     | 2 | 57474.5   | XXX        |
| In-BBescrSp    | 3 | 62439.3   | XX         |
| Con-NanChi     | 3 | 66633.7   | XX         |
| Con-SCKo       | 3 | 66972.0   | XX         |
| In-TeNinvSp2   | 2 | 67106.0   | XXX        |
| In-PsPiñSp     | 3 | 67491.0   | XX         |
| In-BBredSp     | 3 | 72289.3   | XX         |
| chate-Carlta   | 1 | 95647.0   | XXXXXXX    |
| Ag-CallInd     | 3 | 112948.   | XX         |
| Flex-AryaInd   | 3 | 117368.   | XX         |
| In-CGBUSA      | 3 | 118537.   | XX         |
| Tibish-Ksud    | 3 | 118566.   | XX         |
| In-TeNinvSp    | 2 | 120642.   | XXX        |
| Con-FreeCJa    | 3 | 120725.   | XX         |
| Flex-Co20Ind   | 3 | 123868.   | XX         |
| Ag-TendSud     | 3 | 132981.   | XX         |
| Can-PearlJa    | 3 | 143421.   | XX         |
| In-TDewUSA     | 3 | 183244.   | XX         |
| Ag-WChInd      | 3 | 183324.   | XX         |
| Con-MielChi    | 3 | 200806.   | XX         |
| Ac-G22843Se    | 3 | 307583.   | XXX        |
| In-TeSp        | 3 | 309123.   | XXX        |
| Can-EanaHun    | 3 | 391188.   | XXX        |
| Ag-15591Gha    | 3 | 409495.   | XXX        |
| Can-NCFran     | 2 | 446649.   | XXXXXX     |
| La-ErizoSp     | 3 | 467935.   | XXX        |
| Flex-SnakeSA   | 3 | 510132.   | XXX        |
| Con-PauPol     | 3 | 554927.   | XXXX       |
| Can-SucrFran   | 3 | 806131.   | XXXXXXX    |
| In-ComunSp     | 2 | 878963.   | XXXXXXXX   |
| In-LaEscrSp    | 2 | 922083.   | XXXXXXXX   |
| Can-HBJUSA     | 3 | 986207.   | XXXXXXXX   |
| In-LaBolasSp   | 3 | 1.07803E6 | XXXXXXXX   |
| Dud-QAPMGeorg  | 3 | 1.31491E6 | XXXXXXXXXX |
| Can-NOFran     | 2 | 1.35247E6 | XXXXXXXXXX |
| Mom-PII24Ind   | 3 | 1.75632E6 | XXXXXXXXXX |
| La-KroFran     | 4 | 1.84529E6 | XXXXXXXX   |
| Can-GyFran     | 2 | 1.8881E6  | XXXXXXXXXX |
| Am-TokTaj      | 3 | 2.23676E6 | XXXXXXXXXX |
| Mom-KhaInd     | 3 | 2.2843E6  | XXXXXXXXXX |
| La-ZatIta      | 3 | 2.50696E6 | XXXXXXXX   |
| Am-KizilUzbe   | 3 | 2.56084E6 | XXXXXX     |
| Am-NesviGeor   | 3 | 2.99885E6 | XXXXX      |
| Am-KafEgy      | 2 | 3.01859E6 | XXXXXXXX   |
| Can-TopUSA     | 3 | 3.07026E6 | XXXX       |
| Can-VedFran    | 3 | 3.20546E6 | XXXXX      |
| Am-HassanTur   | 3 | 3.55666E6 | XXXX       |

|             |   |           |      |
|-------------|---|-----------|------|
| Dud-QPMAfg  | 3 | 3.92827E6 | XXXX |
| Can-Ogen2Is | 3 | 4.27976E6 | XXXX |
| La-OgenBul  | 3 | 4.47283E6 | XXXX |
| Mom-MR1Ind  | 3 | 4.8652E6  | XXX  |
| Can-PGRFran | 3 | 5.47049E6 | XX   |
| Can-WiUSA   | 3 | 5.5444E6  | XX   |
| Am-korcaRus | 3 | 5.58964E6 | XX   |
| Can-EfJa    | 3 | 5.62532E6 | XX   |
| Can-SemUSA  | 2 | 5.86769E6 | X    |
| Am-YokIs    | 2 | 5.88795E6 | X    |
| Can-DulUSA  | 3 | 5.8924E6  | X    |
| Can-GCHUSA  | 3 | 5.89343E6 | X    |
| Am-AnaFran  | 3 | 5.89349E6 | X    |
| La-CascaPor | 2 | 5.89372E6 | X    |

### LSD analysis for AE.10 per accessions

Method: 95.0 percentage LSD

| <i>accessions</i> | <i>Cases</i> | <i>Mean</i> | <i>Homogeneous groups</i> |
|-------------------|--------------|-------------|---------------------------|
| Ag-WChInd         | 3            | 750.0       | X                         |
| Con-GMJJa         | 3            | 750.0       | X                         |
| Flex-AryaInd      | 3            | 750.0       | X                         |
| Con-MielChi       | 3            | 750.0       | X                         |
| Con-NanChi        | 3            | 750.0       | X                         |
| Ac-SRKSLan        | 3            | 750.0       | X                         |
| In-CGBUSA         | 3            | 750.0       | X                         |
| Flex-SnakeSA      | 3            | 750.0       | X                         |
| In-RoMoch1Sp      | 3            | 750.0       | X                         |
| Ag-TendSud        | 3            | 750.0       | X                         |
| Flex-Co20Ind      | 3            | 750.0       | X                         |
| In-AmAoroSp       | 2            | 750.0       | XX                        |
| Ac-G22843Se       | 3            | 750.0       | X                         |
| In-TeNinvSp2      | 2            | 750.0       | XX                        |
| In-PsPiñSp        | 3            | 750.0       | X                         |
| In-TeNinvSp       | 2            | 750.0       | XX                        |
| Can-EanaHun       | 3            | 750.0       | X                         |
| Ag-CallInd        | 3            | 750.0       | X                         |
| In-HoneyDewUSA    | 3            | 750.0       | X                         |
| Con-ShiroJa       | 3            | 750.0       | X                         |
| In-CrabPor        | 2            | 750.0       | XX                        |
| Con-FreeCJa       | 3            | 750.0       | X                         |
| In-AmCañSp        | 3            | 750.0       | X                         |
| Am-KizilUzbe      | 3            | 750.0       | X                         |
| In-TDewUSA        | 3            | 750.0       | X                         |
| chate-CarIta      | 1            | 750.0       | XX                        |
| In-BBredSp        | 3            | 750.0       | X                         |
| Ac-TGR1551Zimb    | 3            | 750.0       | X                         |
| In-TeSp           | 3            | 750.0       | X                         |
| Con-BaishChi      | 3            | 750.0       | X                         |
| Ac-SVIInd         | 2            | 750.0       | XX                        |
| Chi-VellInd       | 3            | 750.0       | X                         |
| Tibish-Ksud       | 3            | 750.0       | X                         |
| Ag-15591Gha       | 3            | 830.0       | X                         |
| In-BBescrSp       | 3            | 1939.33     | X                         |
| Con-SCKo          | 3            | 1960.67     | X                         |
| In-LaEscrSp       | 2            | 2068.5      | XX                        |

|               |   |         |      |
|---------------|---|---------|------|
| Can-SucrFran  | 3 | 2513.67 | X    |
| Can-NCFran    | 2 | 3271.5  | XX   |
| La-ErizoSp    | 3 | 3598.67 | X    |
| Can-PearlJa   | 3 | 3918.67 | X    |
| La-ZatlIta    | 3 | 8669.0  | XX   |
| Can-WiUSA     | 3 | 10847.3 | XX   |
| Can-NOFran    | 2 | 11290.5 | XX   |
| Am-KafEgy     | 2 | 14909.5 | XX   |
| In-ComunSp    | 2 | 16348.0 | XX   |
| Can-TopUSA    | 3 | 19156.7 | XX   |
| Con-PauPol    | 3 | 21219.0 | XX   |
| In-LaBolasSp  | 3 | 29790.7 | XX   |
| Mom-KhaInd    | 3 | 30479.3 | XX   |
| Dud-QAPMGeorg | 3 | 30907.7 | XX   |
| Can-GCHUSA    | 3 | 31031.3 | XX   |
| Dud-QPMAfg    | 3 | 31869.3 | XX   |
| Can-Ogen2Is   | 3 | 39586.3 | XX   |
| La-OgenBul    | 3 | 45957.3 | XX   |
| Can-HBJUSA    | 3 | 50295.7 | XX   |
| Am-korcaRus   | 3 | 58966.3 | XX   |
| Can-VedFran   | 3 | 68665.7 | XX   |
| La-KroFran    | 4 | 74093.8 | XX   |
| Am-TokTaj     | 3 | 75448.3 | XX   |
| Am-NesviGeor  | 3 | 79627.0 | XX   |
| Can-GyFran    | 2 | 81013.5 | XXX  |
| Can-EfJa      | 3 | 87468.7 | XXX  |
| La-CascaPor   | 2 | 97453.5 | XXXX |
| Mom-MR1Ind    | 3 | 105415. | XXX  |
| Mom-PI124Ind  | 3 | 121552. | XXXX |
| Am-YokIs      | 2 | 124671. | XXXX |
| Can-PGRFran   | 3 | 142753. | XXX  |
| Am-AnaFran    | 3 | 219346. | XXX  |
| Am-HassanTur  | 3 | 242647. | XX   |
| Can-SemUSA    | 2 | 363857. | X    |
| Can-DulUSA    | 3 | 611112. | X    |

#### LSD analysis for AE.11 per accessions

Method: 95.0 percentage LSD

| <i>accessions</i> | <i>Cases</i> | <i>Mean</i> | <i>Homogeneous groups</i> |
|-------------------|--------------|-------------|---------------------------|
| Tibish-Ksud       | 3            | 750.0       | X                         |
| In-TeSp           | 3            | 750.0       | X                         |
| Ac-SVIInd         | 2            | 750.0       | XX                        |
| Chi-VellInd       | 3            | 750.0       | X                         |
| In-RoMoch1Sp      | 3            | 750.0       | X                         |
| In-LaEscrSp       | 2            | 750.0       | XX                        |
| Con-SCKo          | 3            | 750.0       | X                         |
| Con-ShiroJa       | 3            | 750.0       | X                         |
| Ac-SRKSLan        | 3            | 750.0       | X                         |
| In-AmCañSp        | 3            | 750.0       | X                         |
| In-AmAoroSp       | 2            | 750.0       | XX                        |
| Ac-TGR1551Zimb    | 3            | 750.0       | X                         |
| Con-FreeCJa       | 3            | 750.0       | X                         |
| Can-PearlJa       | 3            | 750.0       | X                         |
| Con-NanChi        | 3            | 750.0       | X                         |
| Can-NCFran        | 2            | 750.0       | XX                        |
| In-CrabPor        | 2            | 750.0       | XX                        |

|                |   |           |    |
|----------------|---|-----------|----|
| In-HoneyDewUSA | 3 | 750.0     | X  |
| Con-GMJJa      | 3 | 786.0     | X  |
| In-TDewUSA     | 3 | 804.667   | X  |
| Con-BaishChi   | 3 | 806.667   | X  |
| In-BBredSp     | 3 | 823.333   | X  |
| In-TeNinvSp    | 2 | 827.0     | XX |
| Con-MielChi    | 3 | 842.0     | X  |
| Flex-Co20Ind   | 3 | 938.333   | X  |
| In-PsPiñSp     | 3 | 1005.33   | X  |
| Ac-G22843Se    | 3 | 1073.33   | X  |
| Ag-WChInd      | 3 | 1112.67   | X  |
| Flex-SnakeSA   | 3 | 1379.33   | X  |
| In-CGBUSA      | 3 | 1385.33   | X  |
| Flex-AryaInd   | 3 | 1518.0    | X  |
| Ag-TendSud     | 3 | 1627.0    | X  |
| chate-CarIta   | 1 | 1683.0    | XX |
| Ag-CallInd     | 3 | 1739.0    | X  |
| Can-EanaHun    | 3 | 3163.0    | X  |
| In-BBescrSp    | 3 | 5872.67   | X  |
| Ag-15591Gha    | 3 | 7774.0    | X  |
| In-TeNinvSp2   | 2 | 12943.0   | XX |
| Am-KizilUzbe   | 3 | 15547.3   | X  |
| Can-TopUSA     | 3 | 18543.0   | X  |
| La-OgenBul     | 3 | 21582.7   | X  |
| La-ErizoSp     | 3 | 32348.7   | XX |
| Can-HBJUSA     | 3 | 34474.3   | XX |
| Mom-KhaInd     | 3 | 36034.0   | XX |
| Am-KafEgy      | 2 | 44368.0   | XX |
| Con-PauPol     | 3 | 44990.7   | XX |
| Can-Ogen2Is    | 3 | 45381.0   | XX |
| La-ZatIta      | 3 | 49917.0   | XX |
| Can-EfJa       | 3 | 58795.3   | XX |
| Can-SemUSA     | 2 | 62705.5   | XX |
| Am-YokIs       | 2 | 65835.5   | XX |
| Am-korcaRus    | 3 | 92772.7   | XX |
| Can-WiUSA      | 3 | 103921.   | XX |
| In-ComunSp     | 2 | 108962.   | XX |
| Am-TokTaj      | 3 | 119137.   | XX |
| Can-GCHUSA     | 3 | 128452.   | XX |
| Can-VedFran    | 3 | 219288.   | XX |
| Mom-MR1Ind     | 3 | 224908.   | XX |
| Can-SucrFran   | 3 | 241608.   | XX |
| Can-DulUSA     | 3 | 294621.   | XX |
| Am-AnaFran     | 3 | 312917.   | XX |
| Am-HassanTur   | 3 | 361941.   | XX |
| Dud-QPMAfg     | 3 | 369299.   | XX |
| Mom-PII24Ind   | 3 | 370941.   | XX |
| In-LaBolasSp   | 3 | 387170.   | XX |
| Dud-QAPMGeorg  | 3 | 411432.   | XX |
| Can-PGRFran    | 3 | 484597.   | XX |
| Can-NOFran     | 2 | 510165.   | XX |
| La-CascaPor    | 2 | 570386.   | XX |
| Am-NesviGeor   | 3 | 575846.   | X  |
| La-KroFran     | 4 | 1.68101E6 | X  |
| Can-GyFran     | 2 | 1.70283E6 | X  |

# LSD analysis for AE.12 per accessions

Method: 95.0 percentage LSD

| <i>accessions</i> | <i>Cases</i> | <i>Mean</i> | <i>Homogeneous groups</i> |
|-------------------|--------------|-------------|---------------------------|
| Ac-SVInd          | 2            | 750.0       | XX                        |
| Con-BaishChi      | 3            | 750.0       | X                         |
| In-PsPiñSp        | 3            | 750.0       | X                         |
| Can-EanaHun       | 3            | 750.0       | X                         |
| Dud-QPMAfg        | 3            | 750.0       | X                         |
| Can-NCFran        | 2            | 750.0       | XX                        |
| Con-SCKo          | 3            | 750.0       | X                         |
| Con-ShiroJa       | 3            | 750.0       | X                         |
| Con-MielChi       | 3            | 750.0       | X                         |
| In-TeSp           | 3            | 750.0       | X                         |
| Tibish-Ksud       | 3            | 750.0       | X                         |
| In-AmCañSp        | 3            | 750.0       | X                         |
| In-AmAoroSp       | 2            | 750.0       | XX                        |
| Am-TokTaj         | 3            | 750.0       | X                         |
| Ac-TGR1551Zimb    | 3            | 750.0       | X                         |
| Con-FreeCJa       | 3            | 750.0       | X                         |
| In-RoMoch1Sp      | 3            | 750.0       | X                         |
| Mom-PII24Ind      | 3            | 750.0       | X                         |
| In-BBescrSp       | 3            | 750.0       | X                         |
| Can-SemUSA        | 2            | 750.0       | XX                        |
| In-TeNinvSp2      | 2            | 750.0       | XX                        |
| Con-GMJJa         | 3            | 750.0       | X                         |
| Can-NOFran        | 2            | 750.0       | XX                        |
| In-CrabPor        | 2            | 750.0       | XX                        |
| Can-DulUSA        | 3            | 750.0       | X                         |
| La-ZatIta         | 3            | 750.0       | X                         |
| In-BBredSp        | 3            | 750.0       | X                         |
| In-HoneyDewUSA    | 3            | 750.0       | X                         |
| La-CascaPor       | 2            | 750.0       | XX                        |
| In-CGBUSA         | 3            | 751.0       | X                         |
| Mom-KhaInd        | 3            | 761.333     | X                         |
| Chi-VellInd       | 3            | 761.333     | X                         |
| Mom-MR1Ind        | 3            | 775.333     | X                         |
| Ac-SRKSLan        | 3            | 850.333     | X                         |
| Can-GyFran        | 2            | 860.0       | XX                        |
| Ag-WChInd         | 3            | 1418.0      | X                         |
| Flex-AryaInd      | 3            | 2208.67     | X                         |
| Con-PauPol        | 3            | 2239.33     | X                         |
| Con-NanChi        | 3            | 2425.67     | X                         |
| Dud-QAPMGeorg     | 3            | 2788.33     | X                         |
| Am-AnaFran        | 3            | 3493.33     | X                         |
| In-LaBolasSp      | 3            | 3637.33     | X                         |
| La-KroFran        | 4            | 3808.0      | X                         |
| In-LaEscrSp       | 2            | 4121.0      | XX                        |
| Can-SucrFran      | 3            | 4308.67     | X                         |
| Can-PearlJa       | 3            | 5374.33     | XX                        |
| In-TDewUSA        | 3            | 7223.0      | XX                        |
| Flex-Co20Ind      | 3            | 7436.33     | XX                        |
| Can-TopUSA        | 3            | 7633.33     | XX                        |
| Can-Ogen2Is       | 3            | 8451.0      | XX                        |
| Ag-CallInd        | 3            | 11043.3     | XX                        |
| Can-PGRFran       | 3            | 12293.0     | XX                        |
| Am-NesviGeor      | 3            | 12293.7     | XX                        |



|              |   |         |      |
|--------------|---|---------|------|
| Am-YokIs     | 2 | 12879.0 | XX   |
| Can-EfJa     | 3 | 13388.3 | XX   |
| La-OgenBul   | 3 | 14509.3 | XX   |
| Can-WiUSA    | 3 | 16831.0 | XX   |
| In-TeNinvSp  | 2 | 18019.0 | XX   |
| Am-HassanTur | 3 | 18307.0 | XX   |
| Can-HBJUSA   | 3 | 20846.3 | XX   |
| Am-korcaRus  | 3 | 22073.7 | XX   |
| In-ComunSp   | 2 | 26814.5 | XXX  |
| Am-KizilUzbe | 3 | 29076.0 | XXX  |
| La-ErizoSp   | 3 | 32451.7 | XXX  |
| chate-CarIta | 1 | 37059.0 | XXXX |
| Can-VedFran  | 3 | 52674.3 | XXX  |
| Flex-SnakeSA | 3 | 72591.0 | XX   |
| Ag-TendSud   | 3 | 74250.7 | XX   |
| Ac-G22843Se  | 3 | 84383.3 | X    |
| Am-KafEgy    | 2 | 89705.0 | X    |
| Ag-15591Gha  | 3 | 152603. | X    |
| Can-GCHUSA   | 3 | 165835. | X    |

#### LSD analysis for AE.13 per accessions

Method: 95.0 percentage LSD

| <i>accessions</i> | <i>Cases</i> | <i>Mean</i> | <i>Homogeneous groups</i> |
|-------------------|--------------|-------------|---------------------------|
| chate-CarIta      | 1            | 750.0       | X                         |
| In-PsPiñSp        | 3            | 750.0       | X                         |
| Con-GMJJa         | 3            | 750.0       | X                         |
| Am-YokIs          | 2            | 750.0       | X                         |
| Con-ShiroJa       | 3            | 750.0       | X                         |
| Con-MielChi       | 3            | 750.0       | X                         |
| In-CGBUSA         | 3            | 750.0       | X                         |
| In-AmCañSp        | 3            | 750.0       | X                         |
| Ac-SVIInd         | 2            | 750.0       | X                         |
| Flex-Co20Ind      | 3            | 750.0       | X                         |
| In-AmAoroSp       | 2            | 750.0       | X                         |
| Ag-TendSud        | 3            | 750.0       | X                         |
| Flex-AryaInd      | 3            | 750.0       | X                         |
| Con-FreeCJa       | 3            | 750.0       | X                         |
| In-RoMoch1Sp      | 3            | 750.0       | X                         |
| Can-PearlJa       | 3            | 750.0       | X                         |
| Dud-QPMAfg        | 3            | 750.0       | X                         |
| Flex-SnakeSA      | 3            | 750.0       | X                         |
| Con-PauPol        | 3            | 750.0       | X                         |
| Ag-WChInd         | 3            | 750.0       | X                         |
| Ac-SRKSLan        | 3            | 750.0       | X                         |
| Can-NCFran        | 2            | 750.0       | X                         |
| In-HoneyDewUSA    | 3            | 750.0       | X                         |
| In-TeNinvSp       | 2            | 750.0       | X                         |
| Ac-TGR1551Zimb    | 3            | 750.0       | X                         |
| Ag-CalInd         | 3            | 750.0       | X                         |
| Tibish-Ksud       | 3            | 750.0       | X                         |
| In-CrabPor        | 2            | 750.0       | X                         |
| Chi-VellInd       | 3            | 750.0       | X                         |
| Con-BaishChi      | 3            | 750.0       | X                         |
| Can-GyFran        | 2            | 862.5       | X                         |
| Ag-15591Gha       | 3            | 869.667     | X                         |
| Can-EanaHun       | 3            | 1717.67     | X                         |

|               |   |         |    |
|---------------|---|---------|----|
| In-TeNinvSp2  | 2 | 2004.0  | X  |
| Am-HassanTur  | 3 | 2209.33 | X  |
| In-LaEscrSp   | 2 | 3564.0  | X  |
| Am-KafEgy     | 2 | 3665.5  | X  |
| Am-AnaFran    | 3 | 3780.67 | X  |
| In-BBredSp    | 3 | 3829.67 | X  |
| In-TDewUSA    | 3 | 4103.67 | X  |
| Con-NanChi    | 3 | 4153.33 | X  |
| Con-SCKo      | 3 | 4393.0  | X  |
| Am-KizilUzbe  | 3 | 5363.0  | X  |
| Can-EfJa      | 3 | 5409.0  | X  |
| Can-GCHUSA    | 3 | 5679.0  | X  |
| Can-Ogen2Is   | 3 | 5775.33 | X  |
| Ac-G22843Se   | 3 | 5881.33 | X  |
| La-ZatIta     | 3 | 6553.67 | X  |
| Am-TokTaj     | 3 | 6689.0  | X  |
| Can-DulUSA    | 3 | 9296.0  | X  |
| Can-VedFran   | 3 | 9976.67 | X  |
| In-BBescrSp   | 3 | 10207.7 | X  |
| Can-SemUSA    | 2 | 10365.5 | X  |
| La-OgenBul    | 3 | 11826.0 | X  |
| Am-korcaRus   | 3 | 12036.0 | X  |
| Can-WiUSA     | 3 | 12967.3 | X  |
| La-ErizoSp    | 3 | 13045.7 | X  |
| In-ComunSp    | 2 | 13720.5 | XX |
| Can-PGRFran   | 3 | 17584.3 | XX |
| In-TeSp       | 3 | 18072.3 | XX |
| Mom-MR1Ind    | 3 | 18511.7 | XX |
| Mom-KhaInd    | 3 | 20067.0 | XX |
| Can-NOFran    | 2 | 20246.0 | XX |
| Can-TopUSA    | 3 | 21098.3 | XX |
| La-KroFran    | 4 | 22023.0 | XX |
| Can-HBJUSA    | 3 | 22023.3 | XX |
| Am-NesviGeor  | 3 | 23156.7 | XX |
| In-LaBolasSp  | 3 | 24544.0 | XX |
| Mom-PII24Ind  | 3 | 51759.0 | XX |
| Can-SucrFran  | 3 | 66495.0 | X  |
| La-CascaPor   | 2 | 204372. | X  |
| Dud-QAPMGeorg | 3 | 426907. | X  |

#### LSD analysis for AE.14 per accessions

Method: 95.0 percentage LSD

| <i>accessions</i> | <i>Cases</i> | <i>Mean</i> | <i>Homogeneous groups</i> |
|-------------------|--------------|-------------|---------------------------|
| Flex-Co20Ind      | 3            | 750.0       | X                         |
| Ac-TGR1551Zimb    | 3            | 750.0       | X                         |
| Con-PauPol        | 3            | 4724.33     | XX                        |
| Con-ShiroJa       | 3            | 6517.67     | XX                        |
| Con-FreeCJa       | 3            | 9030.33     | XX                        |
| Tibish-Ksud       | 3            | 19820.3     | XXX                       |
| Con-SCKo          | 3            | 24621.3     | XXX                       |
| Ag-TendSud        | 3            | 26546.3     | XXX                       |
| Con-NanChi        | 3            | 32951.7     | XXX                       |
| Can-SucrFran      | 3            | 33923.7     | XXX                       |
| Flex-SnakeSA      | 3            | 34213.7     | XXX                       |
| Chi-VellInd       | 3            | 45622.7     | XXXX                      |
| Am-HassanTur      | 3            | 95717.7     | XXXXX                     |

|                |   |           |              |
|----------------|---|-----------|--------------|
| La-KroFran     | 4 | 98803.0   | XXXX         |
| Dud-QPMAfg     | 3 | 112171.   | XXXXXX       |
| Ag-15591Gha    | 3 | 134619.   | XXXXXX       |
| Dud-QAPMGeorg  | 3 | 140817.   | XXXXXX       |
| Can-EanaHun    | 3 | 155540.   | XXXXXX       |
| chate-CarIta   | 1 | 157287.   | XXXXXXXXXX   |
| In-PsPiñSp     | 3 | 164075.   | XXXXXX       |
| Am-KafEgy      | 2 | 170065.   | XXXXXX       |
| Ag-WChInd      | 3 | 170465.   | XXXXXX       |
| In-HoneyDewUSA | 3 | 171760.   | XXXXXX       |
| Flex-AryaInd   | 3 | 191575.   | XXXXXX       |
| La-ZatIta      | 3 | 206021.   | XXXXXX       |
| Ag-CallInd     | 3 | 223912.   | XXXXXX       |
| Ac-SVInd       | 2 | 228050.   | XXXXXXXX     |
| Ac-SRKSLan     | 3 | 237795.   | XXXXXX       |
| Con-GMJa       | 3 | 260540.   | XXXXXXXX     |
| Can-NCFran     | 2 | 264335.   | XXXXXXXXXX   |
| Am-NesviGeor   | 3 | 271597.   | XXXXXXXXXX   |
| Mom-MRIInd     | 3 | 311524.   | XXXXXXXXXX   |
| In-TDewUSA     | 3 | 313415.   | XXXXXXXXXX   |
| In-TeSp        | 3 | 335762.   | XXXXXXXXXX   |
| In-BBescrSp    | 3 | 347226.   | XXXXXXXXXX   |
| Con-MielChi    | 3 | 375553.   | XXXXXXXXXX   |
| In-TeNinvSp2   | 2 | 386490.   | XXXXXXXXXX   |
| Am-korcaRus    | 3 | 398623.   | XXXXXXXXXX   |
| In-RoMoch1Sp   | 3 | 400205.   | XXXXXXXXXX   |
| Mom-KhaInd     | 3 | 407367.   | XXXXXXXXXX   |
| Mom-PII24Ind   | 3 | 431104.   | XXXXXXXXXX   |
| In-LaEscrSp    | 2 | 440205.   | XXXXXXXXXXXX |
| Can-NOFran     | 2 | 463470.   | XXXXXXXXXXXX |
| Ac-G22843Se    | 3 | 463477.   | XXXXXXXXXXXX |
| Con-BaishChi   | 3 | 541249.   | XXXXXXXXXXXX |
| In-AmCañSp     | 3 | 542154.   | XXXXXXXXXXXX |
| In-LaBolasSp   | 3 | 548080.   | XXXXXXXXXXXX |
| Can-WiUSA      | 3 | 550868.   | XXXXXXXXXXXX |
| Can-PGRFran    | 3 | 565313.   | XXXXXXXXXXXX |
| Am-KizilUzbe   | 3 | 620705.   | XXXXXXXXXXXX |
| Am-TokTaj      | 3 | 643437.   | XXXXXXXXXXXX |
| In-CrabPor     | 2 | 649477.   | XXXXXXXXXXXX |
| In-ComunSp     | 2 | 707879.   | XXXXXXXXXXXX |
| In-AmAoroSp    | 2 | 776787.   | XXXXXXXXXXXX |
| La-ErizoSp     | 3 | 794686.   | XXXXXXXXXX   |
| Can-GCHUSA     | 3 | 817243.   | XXXXXXXXXX   |
| In-BBredSp     | 3 | 872096.   | XXXXXXXXXX   |
| Can-VedFran    | 3 | 895571.   | XXXXXXXXXX   |
| Can-DulUSA     | 3 | 1.03564E6 | XXXXXXXXXX   |
| Can-HBJUSA     | 3 | 1.04189E6 | XXXXXXXXXX   |
| La-CascaPor    | 2 | 1.05485E6 | XXXXXXXXXX   |
| Can-PearlJa    | 3 | 1.13332E6 | XXXXXX       |
| In-TeNinvSp    | 2 | 1.17374E6 | XXXXXX       |
| In-CGBUSA      | 3 | 1.31706E6 | XXXXXX       |
| Can-TopUSA     | 3 | 1.34615E6 | XXXXXX       |
| La-OgenBul     | 3 | 1.41361E6 | XXXX         |
| Can-EfJa       | 3 | 1.43079E6 | XXX          |
| Am-AnaFran     | 3 | 1.44241E6 | XXXX         |
| Can-Ogen2Is    | 3 | 1.56773E6 |              |

|            |   |           |     |
|------------|---|-----------|-----|
|            |   |           | XXX |
| Am-YokIs   | 2 | 1.8975E6  | XXX |
| Can-GyFran | 2 | 2.04588E6 | XX  |
| Can-SemUSA | 2 | 2.47208E6 | X   |

# LSD analysis for BE.2 per accessions

Method: 95.0 percentage LSD

| <i>accessions</i> | <i>Cases</i> | <i>Mean</i> | <i>Homogeneous groups</i> |
|-------------------|--------------|-------------|---------------------------|
| In-RoMoch1Sp      | 3            | 750.0       | X                         |
| In-CGBUSA         | 3            | 750.0       | X                         |
| Ac-SRKSLan        | 3            | 750.0       | X                         |
| Ac-TGR1551Zimb    | 3            | 750.0       | X                         |
| In-AmCañSp        | 3            | 750.0       | X                         |
| In-AmAoroSp       | 2            | 750.0       | X                         |
| In-PsPiñSp        | 3            | 750.0       | X                         |
| In-HoneyDewUSA    | 3            | 750.0       | X                         |
| In-CrabPor        | 2            | 750.0       | X                         |
| Ac-SVInd          | 2            | 750.0       | X                         |
| chate-Carlta      | 1            | 750.0       | XXX                       |
| Tibish-Ksud       | 3            | 761.333     | X                         |
| Ag-WChInd         | 3            | 793.667     | X                         |
| Ac-G22843Se       | 3            | 795.667     | X                         |
| Flex-Co20Ind      | 3            | 806.333     | X                         |
| In-BBredSp        | 3            | 818.667     | X                         |
| Con-FreeCJa       | 3            | 835.333     | X                         |
| Flex-SnakeSA      | 3            | 852.333     | X                         |
| Ag-TendSud        | 3            | 858.333     | X                         |
| Con-BaishChi      | 3            | 966.0       | X                         |
| Chi-VellInd       | 3            | 967.667     | X                         |
| Ag-15591Gha       | 3            | 1048.67     | X                         |
| Con-GMJJa         | 3            | 4560.0      | X                         |
| Con-ShiroJa       | 3            | 5445.67     | X                         |
| Mom-KhaInd        | 3            | 7436.67     | X                         |
| Am-TokTaj         | 3            | 9802.67     | X                         |
| Con-MielChi       | 3            | 10752.7     | X                         |
| Can-HBJUSA        | 3            | 12200.7     | X                         |
| In-BBescrSp       | 3            | 14091.7     | X                         |
| In-LaEscrSp       | 2            | 16572.5     | X                         |
| Can-PearlJa       | 3            | 18551.7     | X                         |
| In-TeNinvSp       | 2            | 19973.5     | X                         |
| In-TDewUSA        | 3            | 23628.7     | X                         |
| Ag-CallInd        | 3            | 27217.7     | X                         |
| Can-NCFran        | 2            | 30625.5     | X                         |
| Am-HassanTur      | 3            | 33788.3     | X                         |
| Can-SucrFran      | 3            | 34303.0     | X                         |
| Con-PauPol        | 3            | 37739.7     | X                         |
| Can-SemUSA        | 2            | 39172.5     | XX                        |
| Can-EanaHun       | 3            | 49923.7     | X                         |
| Flex-AryaInd      | 3            | 50684.7     | X                         |
| Am-KizilUzbe      | 3            | 50998.3     | X                         |
| Dud-QPMAfg        | 3            | 54053.3     | X                         |
| Can-WiUSA         | 3            | 56617.0     | X                         |
| Con-SCKo          | 3            | 85624.0     | X                         |

|               |   |           |          |
|---------------|---|-----------|----------|
| Mom-PII24Ind  | 3 | 102331.   | XX       |
| Am-korcaRus   | 3 | 108406.   | XX       |
| La-ErizoSp    | 3 | 109949.   | XX       |
| Con-NanChi    | 3 | 122109.   | XX       |
| La-CascaPor   | 2 | 125324.   | XXX      |
| Can-GyFran    | 2 | 177781.   | XXX      |
| La-ZatIta     | 3 | 185820.   | XXX      |
| Am-KafEgy     | 2 | 243628.   | XXXX     |
| In-TeNinvSp2  | 2 | 253087.   | XXXXXX   |
| Can-VedFran   | 3 | 253680.   | XXX      |
| In-ComunSp    | 2 | 284170.   | XXXXXX   |
| Can-TopUSA    | 3 | 297529.   | XXXX     |
| Can-DulUSA    | 3 | 306559.   | XXXX     |
| Am-NesviGeor  | 3 | 316681.   | XXXXXX   |
| La-KroFran    | 4 | 412828.   | XXXXXXX  |
| Can-EfJa      | 3 | 447350.   | XXXXXXX  |
| Can-Ogen2Is   | 3 | 536555.   | XXXXXXXX |
| Can-PGRFran   | 3 | 639702.   | XXXXXXXX |
| Mom-MRIInd    | 3 | 692018.   | XXXXXXXX |
| In-LaBolasSp  | 3 | 805048.   | XXXXXX   |
| Dud-QAPMGeorg | 3 | 827136.   | XXXXXX   |
| In-TeSp       | 3 | 848292.   | XXXX     |
| Can-NOFran    | 2 | 943359.   | XXXX     |
| Am-AnaFran    | 3 | 1.05541E6 | XXXX     |
| Am-YokIs      | 2 | 1.15345E6 | XXX      |
| La-OgenBul    | 3 | 1.43433E6 | XX       |
| Can-GCHUSA    | 3 | 1.5634E6  | X        |

#### LSD analysis for BE.1 per accessions

Method: 95.0 percentage LSD

| <i>accessions</i> | <i>Cases</i> | <i>Mean</i> | <i>Homogeneous groups</i> |
|-------------------|--------------|-------------|---------------------------|
| In-HoneyDewUSA    | 3            | 750.0       | X                         |
| Ag-TendSud        | 3            | 750.0       | X                         |
| Ag-WChInd         | 3            | 750.0       | X                         |
| Con-GMJJa         | 3            | 750.0       | X                         |
| Ac-G22843Se       | 3            | 750.0       | X                         |
| Con-ShiroJa       | 3            | 750.0       | X                         |
| In-AmAoroSp       | 2            | 750.0       | X                         |
| In-AmCañSp        | 3            | 750.0       | X                         |
| Con-MielChi       | 3            | 750.0       | X                         |
| Ac-SVIIInd        | 2            | 750.0       | X                         |
| In-CGBUSA         | 3            | 750.0       | X                         |
| Flex-Co20Ind      | 3            | 750.0       | X                         |
| Ag-15591Gha       | 3            | 750.0       | X                         |
| In-BBescrSp       | 3            | 750.0       | X                         |
| In-CrabPor        | 2            | 750.0       | X                         |
| In-BBredSp        | 3            | 750.0       | X                         |
| Ac-SRKSLan        | 3            | 750.0       | X                         |
| Can-HBJUSA        | 3            | 750.0       | X                         |
| Tibish-Ksud       | 3            | 750.0       | X                         |
| In-RoMoch1Sp      | 3            | 750.0       | X                         |
| Ac-TGR1551Zimb    | 3            | 750.0       | X                         |
| Can-NCFran        | 2            | 750.0       | X                         |
| Flex-SnakeSA      | 3            | 750.0       | X                         |
| Con-FreeCJa       | 3            | 750.0       | X                         |
| Mom-KhaInd        | 3            | 750.0       | X                         |

|               |   |         |         |
|---------------|---|---------|---------|
| Chi-VellInd   | 3 | 750.0   | X       |
| Con-BaishChi  | 3 | 750.0   | X       |
| chate-CarIta  | 1 | 750.0   | XXX     |
| In-PsPiñSp    | 3 | 750.0   | X       |
| In-TeNinvSp   | 2 | 750.0   | X       |
| Can-SemUSA    | 2 | 2044.5  | X       |
| Can-PearlJa   | 3 | 3835.33 | X       |
| Con-PauPol    | 3 | 4325.33 | X       |
| Con-SCKo      | 3 | 4601.33 | X       |
| In-TDewUSA    | 3 | 4915.33 | X       |
| Dud-QPMAfg    | 3 | 5938.0  | X       |
| Con-NanChi    | 3 | 6185.0  | X       |
| Am-TokTaj     | 3 | 6945.67 | X       |
| Can-WiUSA     | 3 | 8092.67 | X       |
| In-LaEscrSp   | 2 | 8610.5  | X       |
| Can-TopUSA    | 3 | 13338.7 | X       |
| Ag-CallInd    | 3 | 13388.3 | X       |
| La-ErizoSp    | 3 | 14345.3 | X       |
| Am-KizilUzbe  | 3 | 14527.7 | X       |
| Can-SucrFran  | 3 | 18926.0 | X       |
| Am-HassanTur  | 3 | 20179.3 | X       |
| Can-EanaHun   | 3 | 21952.7 | X       |
| La-CascaPor   | 2 | 26259.0 | X X     |
| Can-DulUSA    | 3 | 27481.7 | X       |
| Am-korcaRus   | 3 | 29104.3 | X       |
| Can-Ogen2Is   | 3 | 36757.3 | X       |
| Mom-PII24Ind  | 3 | 39004.0 | X X     |
| Can-GyFran    | 2 | 42064.5 | XXXXX   |
| In-ComunSp    | 2 | 44799.0 | XXXXX   |
| Can-VedFran   | 3 | 45371.3 | X X     |
| In-TeNinvSp2  | 2 | 46411.5 | XXXXX   |
| Flex-AryaInd  | 3 | 50247.7 | XXX     |
| Am-KafEgy     | 2 | 57416.0 | XXXXXX  |
| Am-YokIs      | 2 | 64706.5 | XXXXXX  |
| La-KroFran    | 4 | 65318.3 | XXX     |
| Can-EfJa      | 3 | 67517.3 | XXXXXX  |
| Am-AnaFran    | 3 | 73833.0 | XXXXXX  |
| Dud-QAPMGeorg | 3 | 90077.3 | XXXXXXX |
| Can-PGRFran   | 3 | 91332.0 | XXXXXXX |
| In-LaBolasSp  | 3 | 95832.3 | XXXXXXX |
| La-ZatIta     | 3 | 121890. | XXXXXXX |
| Am-NesviGeor  | 3 | 176895. | X XXX   |
| Can-NOFran    | 2 | 182965. | XXXXXX  |
| In-TeSp       | 3 | 186557. | XXX     |
| Can-GCHUSA    | 3 | 193816. | XX      |
| La-OgenBul    | 3 | 214202. | X       |
| Mom-MR1Ind    | 3 | 542191. | X       |

#### LSD analysis for BE.3 per accessions

Method: 95.0 percentage LSD

| <i>accessions</i> | <i>Cases</i> | <i>Mean</i> | <i>Homogeneous groups</i> |
|-------------------|--------------|-------------|---------------------------|
| In-HoneyDewUSA    | 3            | 750.0       | X                         |
| In-RoMoch1Sp      | 3            | 750.0       | X                         |
| Ac-TGR1551Zimb    | 3            | 750.0       | X                         |
| In-TDewUSA        | 3            | 750.0       | X                         |
| Ag-WChInd         | 3            | 750.0       | X                         |

|              |   |         |          |
|--------------|---|---------|----------|
| Tibish-Ksud  | 3 | 750.0   | X        |
| In-AmCañSp   | 3 | 750.0   | X        |
| Ac-G22843Se  | 3 | 750.0   | X        |
| Can-HBJUSA   | 3 | 750.0   | X        |
| Con-BaishChi | 3 | 750.0   | X        |
| Ac-SRKSLan   | 3 | 750.0   | X        |
| Flex-SnakeSA | 3 | 750.0   | X        |
| In-CGBUSA    | 3 | 750.0   | X        |
| Con-ShiroJa  | 3 | 750.0   | X        |
| In-PsPiñSp   | 3 | 750.0   | X        |
| Chi-VellInd  | 3 | 750.0   | X        |
| Ag-TendSud   | 3 | 750.0   | X        |
| In-AmAoroSp  | 2 | 750.0   | X        |
| Flex-Co20Ind | 3 | 750.0   | X        |
| Can-PearlJa  | 3 | 750.0   | X        |
| In-BBredSp   | 3 | 750.0   | X        |
| Mom-KhaInd   | 3 | 750.0   | X        |
| In-CrabPor   | 2 | 750.0   | X        |
| Ac-SVIIInd   | 2 | 750.0   | X        |
| Con-GMJJa    | 3 | 750.0   | X        |
| Con-FreeCJa  | 3 | 750.0   | X        |
| Ag-CallInd   | 3 | 750.0   | X        |
| Am-TokTaj    | 3 | 750.0   | X        |
| Con-SCKo     | 3 | 1797.0  | X        |
| Con-MielChi  | 3 | 1895.0  | X        |
| In-BBescrSp  | 3 | 2167.67 | X        |
| In-LaEscrSp  | 2 | 2496.0  | XX       |
| Flex-AryaInd | 3 | 2891.0  | X        |
| Can-SemUSA   | 2 | 3101.0  | XX       |
| Can-NCFran   | 2 | 3167.5  | XX       |
| chate-Carlta | 1 | 3301.0  | XXXX     |
| Dud-QPMAfg   | 3 | 3607.0  | X        |
| Can-EanaHun  | 3 | 3687.33 | X        |
| Con-PauPol   | 3 | 3876.67 | X        |
| In-TeNinvSp  | 2 | 4205.0  | XX       |
| Am-KizilUzbe | 3 | 4764.33 | X        |
| Can-WiUSA    | 3 | 5117.67 | X        |
| Am-HassanTur | 3 | 5313.67 | X        |
| Mom-PII24Ind | 3 | 6652.67 | X        |
| Can-SucrFran | 3 | 8299.33 | X        |
| La-ErizoSp   | 3 | 10227.3 | XX       |
| Con-NanChi   | 3 | 10619.0 | XX       |
| Am-korcaRus  | 3 | 15898.7 | XX       |
| Ag-15591Gha  | 3 | 20357.3 | XX X     |
| Can-TopUSA   | 3 | 21998.7 | XX X     |
| In-ComunSp   | 2 | 23958.5 | XXXX     |
| La-CascaPor  | 2 | 24361.0 | XXXX     |
| In-TeNinvSp2 | 2 | 27235.5 | XXXX     |
| La-ZatIta    | 3 | 28279.0 | XXXX     |
| Can-VedFran  | 3 | 28780.3 | XXXX     |
| Can-DulUSA   | 3 | 32973.3 | XXXX     |
| Am-KafEgy    | 2 | 34367.5 | XXXXXX   |
| Can-Ogen2Is  | 3 | 37041.7 | XXXX     |
| In-TeSp      | 3 | 39619.3 | XXXX     |
| Am-NesviGeor | 3 | 45341.3 | XXXXXX   |
| Can-GyFran   | 2 | 51031.5 | XXXXXXXX |
| Can-EfJa     | 3 | 56021.7 | XXXXXXXX |

|               |   |         |        |
|---------------|---|---------|--------|
| La-KroFran    | 4 | 57173.8 | XXXXXX |
| Dud-QAPMGeorg | 3 | 84425.7 | XXXXXX |
| Can-PGRFran   | 3 | 102473. | X XXXX |
| Am-YokIs      | 2 | 102840. | XXXXXX |
| Can-NOFran    | 2 | 123671. | XXXX   |
| Mom-MR1Ind    | 3 | 125442. | XXX    |
| In-LaBolasSp  | 3 | 128881. | XX     |
| Am-AnaFran    | 3 | 171842. | XX     |
| La-OgenBul    | 3 | 210852. | XX     |
| Can-GCHUSA    | 3 | 257258. | X      |

#### LSD analysis for E.8 per accessions

Method: 95.0 percentage LSD

| <i>accessions</i> | <i>Cases</i> | <i>Mean</i> | <i>Homogeneous groups</i> |
|-------------------|--------------|-------------|---------------------------|
| chate-CarIta      | 1            | 750.0       | XXXXX                     |
| In-PsPiñSp        | 3            | 750.0       | X                         |
| Flex-Co20Ind      | 3            | 750.0       | X                         |
| Ac-TGR1551Zimb    | 3            | 750.0       | X                         |
| Con-FreeCJa       | 3            | 765.667     | X                         |
| In-RoMoch1Sp      | 3            | 777.0       | X                         |
| Tibish-Ksud       | 3            | 780.0       | X                         |
| Ag-TendSud        | 3            | 781.667     | X                         |
| In-AmAoroSp       | 2            | 796.5       | XXX                       |
| Ac-SV1Ind         | 2            | 901.0       | XXX                       |
| Ac-SRKSLan        | 3            | 2024.33     | X                         |
| Ag-15591Gha       | 3            | 2761.33     | X                         |
| In-HoneyDewUSA    | 3            | 4048.67     | X X                       |
| In-CrabPor        | 2            | 4963.0      | XXX                       |
| In-CGBUSA         | 3            | 5187.0      | X X                       |
| Mom-KhaInd        | 3            | 9140.0      | X X                       |
| Flex-SnakeSA      | 3            | 9458.67     | X X                       |
| Ag-WChInd         | 3            | 10543.3     | X X                       |
| In-BBredSp        | 3            | 12854.7     | X X                       |
| Con-ShiroJa       | 3            | 14340.0     | X X                       |
| Con-MielChi       | 3            | 17932.0     | X X                       |
| Can-NCFran        | 2            | 17994.0     | XXX                       |
| Can-SucrFran      | 3            | 22601.3     | X X                       |
| In-TeNinvSp       | 2            | 28122.5     | XXX X                     |
| Con-GMJJa         | 3            | 30546.7     | X X                       |
| Chi-VellInd       | 3            | 32247.0     | X X                       |
| In-LaEscrSp       | 2            | 39064.0     | XXX X                     |
| Con-PauPol        | 3            | 41628.0     | X X                       |
| Ac-G22843Se       | 3            | 46443.0     | X X                       |
| In-BBescrSp       | 3            | 48950.7     | X X                       |
| Am-TokTaj         | 3            | 59617.0     | XXX                       |
| La-ZatIta         | 3            | 61489.0     | XXX                       |
| Dud-QPMAfg        | 3            | 71036.3     | XXX X                     |
| Con-NanChi        | 3            | 71347.0     | XXX X                     |
| In-TDewUSA        | 3            | 72399.7     | XXX X                     |
| Can-EanaHun       | 3            | 78067.3     | XXX X                     |
| Ag-CallInd        | 3            | 78753.7     | XXX X                     |
| Can-GyFran        | 2            | 79027.5     | XXXXX                     |
| Can-WiUSA         | 3            | 95344.7     | XXX X                     |
| Am-HassanTur      | 3            | 96541.7     | XXX X                     |
| Con-BaishChi      | 3            | 98284.3     | XXX X                     |
| Can-PGRFran       | 3            | 131117.     | XXXXX                     |



|               |   |           |            |
|---------------|---|-----------|------------|
| La-CascaPor   | 2 | 134559.   | XXXXX      |
| Flex-AryaInd  | 3 | 145331.   | XXXXX      |
| Mom-MR1Ind    | 3 | 152064.   | XXXXX      |
| Con-SCKo      | 3 | 159805.   | XXXXX      |
| Am-KizilUzbe  | 3 | 169586.   | XXXXX      |
| Mom-PII24Ind  | 3 | 205656.   | XXXXXX     |
| Am-KafEgy     | 2 | 248000.   | XXXXXXXX   |
| In-LaBolasSp  | 3 | 314774.   | XXXXXXXX   |
| Can-TopUSA    | 3 | 315849.   | XXXXXXXX   |
| Can-VedFran   | 3 | 321341.   | XXXXXXXXXX |
| Am-korcaRus   | 3 | 348486.   | XXXXXXXXXX |
| Can-DulUSA    | 3 | 351862.   | XXXXXXXXXX |
| Can-HBJUSA    | 3 | 365188.   | XXXXXXXXXX |
| In-AmCañSp    | 3 | 382755.   | XXXXXXXXXX |
| Can-Ogen2Is   | 3 | 424806.   | XXXXXXXXXX |
| Am-AnaFran    | 3 | 444422.   | XXXXXXXXXX |
| Dud-QAPMGeorg | 3 | 494147.   | X XXXXXXX  |
| Can-NOFran    | 2 | 500770.   | XXXXXXXXXX |
| Can-PearlJa   | 3 | 549092.   | X XXXXX    |
| In-ComunSp    | 2 | 563056.   | XXXXXXXX   |
| Can-SemUSA    | 2 | 684966.   | XXXXXXXX   |
| La-ErizoSp    | 3 | 709610.   | XXXXXX     |
| La-KroFran    | 4 | 733685.   | XXXX       |
| Am-NesviGeor  | 3 | 803974.   | XXX        |
| Can-EfJa      | 3 | 861504.   | XXX        |
| In-TeSp       | 3 | 1.09505E6 | XXX        |
| La-OgenBul    | 3 | 1.11587E6 | XXX        |
| Can-GCHUSA    | 3 | 1.29408E6 | XX         |
| In-TeNinvSp2  | 2 | 1.37271E6 | X          |
| Am-YokIs      | 2 | 2.19352E6 | X          |

#### LSD analysis for E.13 per accessions

Method: 95.0 percentage LSD

| <i>accessions</i> | <i>Cases</i> | <i>Mean</i> | <i>Homogeneous groups</i> |
|-------------------|--------------|-------------|---------------------------|
| Ac-TGR1551Zimb    | 3            | 750.0       | X                         |
| Tibish-Ksud       | 3            | 750.0       | X                         |
| In-RoMoch1Sp      | 3            | 750.0       | X                         |
| In-AmAoroSp       | 2            | 750.0       | XXX                       |
| Can-NCFran        | 2            | 750.0       | XXX                       |
| In-CrabPor        | 2            | 750.0       | XXX                       |
| In-CGBUSA         | 3            | 750.0       | X                         |
| Con-FreeCJa       | 3            | 750.0       | X                         |
| In-PsPiñSp        | 3            | 750.0       | X                         |
| Ac-SRKSLan        | 3            | 750.0       | X                         |
| In-HoneyDewUSA    | 3            | 750.0       | X                         |
| chate-CarIta      | 1            | 750.0       | XXXX                      |
| Flex-Co20Ind      | 3            | 756.0       | X                         |
| Con-MielChi       | 3            | 758.0       | X                         |
| Ag-WChInd         | 3            | 779.0       | X                         |
| In-BBredSp        | 3            | 789.667     | X                         |
| Ac-SVIInd         | 2            | 802.0       | XXX                       |
| Ag-15591Gha       | 3            | 825.0       | X                         |
| Flex-SnakeSA      | 3            | 839.0       | X                         |
| Ag-TendSud        | 3            | 858.333     | X                         |
| Mom-KhaInd        | 3            | 890.333     | X                         |
| Chi-VellInd       | 3            | 967.667     | X                         |

|               |   |           |       |
|---------------|---|-----------|-------|
| Con-GMJa      | 3 | 2957.67   | X     |
| In-LaEscrSp   | 2 | 4309.0    | XXX   |
| In-TeNinvSp   | 2 | 4777.5    | XXX   |
| Ac-G22843Se   | 3 | 5644.33   | X     |
| Con-ShiroJa   | 3 | 6203.33   | X     |
| Con-PauPol    | 3 | 6758.67   | XX    |
| Can-WiUSA     | 3 | 11819.0   | XX    |
| Dud-QPMAfg    | 3 | 17700.3   | XX    |
| Con-SCKo      | 3 | 17764.7   | XX    |
| Can-SucrFran  | 3 | 17903.0   | XX    |
| In-BBescrSp   | 3 | 18428.7   | XX    |
| Am-TokTaj     | 3 | 23043.0   | XXX   |
| In-TDewUSA    | 3 | 23996.3   | XXX   |
| Am-HassanTur  | 3 | 24382.0   | XXX   |
| Can-EanaHun   | 3 | 24867.7   | XXX   |
| Con-BaishChi  | 3 | 25733.0   | XXX   |
| Ag-CallInd    | 3 | 26510.0   | XXX   |
| Can-PGRFran   | 3 | 29659.0   | XXX   |
| In-AmCañSp    | 3 | 31978.3   | XXX   |
| Con-NanChi    | 3 | 35532.3   | XXX   |
| Flex-AryaInd  | 3 | 49862.3   | XXX   |
| Can-GyFran    | 2 | 52377.5   | XXX   |
| Am-KizilUzbe  | 3 | 55324.3   | XXX   |
| Can-SemUSA    | 2 | 56134.0   | XXX   |
| Am-KafEgy     | 2 | 57614.0   | XXX   |
| La-CascaPor   | 2 | 62394.5   | XXX   |
| Can-HBJUSA    | 3 | 68133.0   | XXX   |
| Can-TopUSA    | 3 | 70550.7   | XXX   |
| Can-Ogen2Is   | 3 | 71851.7   | XXX   |
| Am-AnaFran    | 3 | 75326.7   | XXX   |
| In-ComunSp    | 2 | 82481.0   | XXX   |
| Can-VedFran   | 3 | 85680.0   | XXX   |
| Can-NOFran    | 2 | 108483.   | XXXX  |
| La-KroFran    | 4 | 119775.   | XXX   |
| Mom-MR1Ind    | 3 | 140496.   | XXXX  |
| La-ZatIta     | 3 | 142612.   | XXXX  |
| Can-PearlJa   | 3 | 147214.   | XXXX  |
| Can-DulUSA    | 3 | 148318.   | XXXX  |
| Dud-QAPMGeorg | 3 | 159521.   | XXXX  |
| In-LaBolasSp  | 3 | 159918.   | XXXX  |
| Am-korcaRus   | 3 | 199773.   | XXXX  |
| Mom-PII24Ind  | 3 | 242398.   | XXXX  |
| Am-YokIs      | 2 | 301221.   | XXXXX |
| La-ErizoSp    | 3 | 312298.   | XXXX  |
| Can-EfJa      | 3 | 338079.   | XXXX  |
| Can-GCHUSA    | 3 | 350643.   | XXX   |
| In-TeSp       | 3 | 453832.   | XX    |
| Am-NesviGeor  | 3 | 649102.   | XX    |
| La-OgenBul    | 3 | 804416.   | X     |
| In-TeNinvSp2  | 2 | 1.29839E6 | X     |

#### LSD analysis for E.10 per accessions

Method: 95.0 percentage LSD

| <i>accessions</i> | <i>Cases</i> | <i>Mean</i> | <i>Homogeneous groups</i> |
|-------------------|--------------|-------------|---------------------------|
| Tibish-Ksud       | 3            | 750.0       | X                         |
| Ac-SRKSLan        | 3            | 750.0       | X                         |

|                |   |         |    |
|----------------|---|---------|----|
| In-ComunSp     | 2 | 750.0   | XX |
| Ac-TGR1551Zimb | 3 | 750.0   | X  |
| Am-TokTaj      | 3 | 750.0   | X  |
| In-AmAoroSp    | 2 | 750.0   | XX |
| In-RoMoch1Sp   | 3 | 750.0   | X  |
| Ac-SV1Ind      | 2 | 750.0   | XX |
| Can-DulUSA     | 3 | 750.0   | X  |
| Con-ShiroJa    | 3 | 750.0   | X  |
| Dud-QPMAfg     | 3 | 750.0   | X  |
| Chi-VellInd    | 3 | 750.0   | X  |
| In-PsPiñSp     | 3 | 750.0   | X  |
| Can-SemUSA     | 2 | 759.0   | XX |
| In-TeNinvSp    | 2 | 771.5   | XX |
| Can-PearlJa    | 3 | 772.667 | X  |
| In-CGBUSA      | 3 | 774.0   | X  |
| Mom-PII24Ind   | 3 | 777.667 | X  |
| Am-HassanTur   | 3 | 778.333 | X  |
| Ag-TendSud     | 3 | 780.0   | X  |
| Flex-AryaInd   | 3 | 783.333 | X  |
| Con-MielChi    | 3 | 791.333 | X  |
| In-LaEscrSp    | 2 | 795.5   | XX |
| Can-WiUSA      | 3 | 800.0   | X  |
| Flex-SnakeSA   | 3 | 803.333 | X  |
| Am-KizilUzbe   | 3 | 808.333 | X  |
| Am-KafEgy      | 2 | 811.0   | XX |
| In-BBredSp     | 3 | 816.667 | X  |
| In-HoneyDewUSA | 3 | 818.667 | X  |
| Con-GMJJa      | 3 | 819.667 | X  |
| In-AmCañSp     | 3 | 831.333 | X  |
| Ag-WChInd      | 3 | 845.667 | X  |
| Can-NCFran     | 2 | 853.5   | XX |
| In-TDewUSA     | 3 | 878.0   | X  |
| Con-SCKo       | 3 | 879.0   | X  |
| Con-PauPol     | 3 | 890.667 | X  |
| Can-HBJUSA     | 3 | 900.0   | X  |
| In-CrabPor     | 2 | 902.5   | XX |
| chate-CarIta   | 1 | 908.0   | XX |
| In-BBescrSp    | 3 | 911.667 | X  |
| Can-EanaHun    | 3 | 913.333 | X  |
| Con-BaishChi   | 3 | 917.0   | X  |
| Con-FreeCJa    | 3 | 945.0   | X  |
| Mom-KhaInd     | 3 | 957.667 | X  |
| Flex-Co20Ind   | 3 | 971.333 | X  |
| Ac-G22843Se    | 3 | 1018.0  | X  |
| Ag-15591Gha    | 3 | 1131.67 | X  |
| Am-NesviGeor   | 3 | 2925.67 | XX |
| Can-Ogen2Is    | 3 | 4311.33 | XX |
| Am-korcaRus    | 3 | 4889.67 | XX |
| Ag-CallInd     | 3 | 6434.0  | XX |
| Can-SucrFran   | 3 | 6444.67 | XX |
| La-ZatIta      | 3 | 8568.0  | XX |
| Can-EfJa       | 3 | 9207.0  | XX |
| Con-NanChi     | 3 | 10640.7 | XX |
| La-CascaPor    | 2 | 11135.5 | XX |
| Dud-QAPMGeorg  | 3 | 11194.7 | XX |
| In-TeSp        | 3 | 14676.0 | XX |
| La-ErizoSp     | 3 | 16332.0 | XX |

|              |   |         |      |
|--------------|---|---------|------|
| Mom-MR1Ind   | 3 | 17002.3 | XX   |
| In-LaBolasSp | 3 | 22505.7 | XXX  |
| La-OgenBul   | 3 | 22982.0 | XXX  |
| Can-VedFran  | 3 | 24346.7 | XXX  |
| Can-TopUSA   | 3 | 25202.0 | XXXX |
| Can-GyFran   | 2 | 27912.0 | XXXX |
| Am-YokIs     | 2 | 28485.5 | XXXX |
| In-TeNinvSp2 | 2 | 34724.5 | XXXX |
| La-KroFran   | 4 | 35579.8 | XXX  |
| Can-PGRFran  | 3 | 53851.7 | XX   |
| Can-NOFran   | 2 | 63797.5 | XX   |
| Can-GCHUSA   | 3 | 97306.3 | X    |
| Am-AnaFran   | 3 | 141370. | X    |

#### LSD analysis for E.4 per accessions

Method: 95.0 percentage LSD

| <i>accessions</i> | <i>Cases</i> | <i>Mean</i> | <i>Homogeneous groups</i> |
|-------------------|--------------|-------------|---------------------------|
| Ag-TendSud        | 3            | 1066.0      | X                         |
| Con-ShiroJa       | 3            | 1211.0      | X                         |
| Ac-TGR1551Zimb    | 3            | 1235.0      | X                         |
| Ac-SRKSLan        | 3            | 1238.67     | X                         |
| Ac-SV1Ind         | 2            | 1245.5      | XXXX                      |
| In-CGBUSA         | 3            | 1261.33     | X                         |
| Tibish-Ksud       | 3            | 1268.67     | X                         |
| In-PsPiñSp        | 3            | 1340.33     | X                         |
| In-HoneyDewUSA    | 3            | 1343.0      | X                         |
| Con-FreeCJa       | 3            | 1697.33     | X                         |
| In-CrabPor        | 2            | 1702.0      | XXXXX                     |
| In-BBredSp        | 3            | 1744.0      | X                         |
| chate-Carlta      | 1            | 1796.0      | XXXXXXXX                  |
| Can-NCFran        | 2            | 1829.5      | XXXXX                     |
| Flex-Co20Ind      | 3            | 1904.0      | X                         |
| Ag-WChInd         | 3            | 1951.33     | X                         |
| Ag-15591Gha       | 3            | 10971.0     | X                         |
| Chi-VellInd       | 3            | 15144.7     | X                         |
| In-AmAoroSp       | 2            | 24789.0     | XXXXX                     |
| Can-EanaHun       | 3            | 45130.7     | X                         |
| In-TeNinvSp       | 2            | 48838.0     | XXXXXXX                   |
| Dud-QPMAfg        | 3            | 62224.3     | X X                       |
| In-RoMoch1Sp      | 3            | 65572.0     | X X                       |
| Ag-CallInd        | 3            | 72897.3     | X X                       |
| In-AmCañSp        | 3            | 77005.7     | X X                       |
| Ac-G22843Se       | 3            | 85608.0     | XX X                      |
| In-TDewUSA        | 3            | 94193.7     | XXXX                      |
| In-LaEscrSp       | 2            | 95363.0     | XXXXXXX                   |
| Mom-KhaInd        | 3            | 102843.     | XXXX                      |
| Flex-AryaInd      | 3            | 109623.     | XXXXX                     |
| In-BBescrSp       | 3            | 119250.     | XXXXX                     |
| Am-KizilUzbe      | 3            | 123043.     | XXXXX                     |
| La-CascaPor       | 2            | 126665.     | XXXXXXX                   |
| Am-TokTaj         | 3            | 127829.     | XXXXX                     |
| Con-PauPol        | 3            | 135698.     | XXXXX                     |
| Flex-SnakeSA      | 3            | 199130.     | XXXXXXX                   |
| Can-SemUSA        | 2            | 227289.     | XXXXXXX                   |
| Am-HassanTur      | 3            | 228825.     | XXXXXXX                   |
| Can-PearlJa       | 3            | 254027.     | XXXXXXX                   |

|               |   |           |          |
|---------------|---|-----------|----------|
| Can-HBJUSA    | 3 | 338239.   | XXXXXXX  |
| Con-GMJJa     | 3 | 350687.   | XXXXXXX  |
| Am-KaIEgy     | 2 | 351283.   | XXXXXXXX |
| Can-WiUSA     | 3 | 363198.   | XXXXXXX  |
| Con-SCKo      | 3 | 369277.   | XXXXXXXX |
| In-ComunSp    | 2 | 385805.   | XXXXXXXX |
| Mom-PII24Ind  | 3 | 389671.   | XXXXXXXX |
| Am-korcaRus   | 3 | 403770.   | XXXXXXXX |
| La-KroFran    | 4 | 411698.   | XXXXXXX  |
| Con-BaishChi  | 3 | 461172.   | XXXXXXXX |
| Con-NanChi    | 3 | 502435.   | XXXXXXXX |
| Can-TopUSA    | 3 | 534830.   | XXXXXXXX |
| Am-NesviGeor  | 3 | 576190.   | XXXXXXXX |
| Can-PGRFran   | 3 | 577212.   | XXXXXXXX |
| Can-DulUSA    | 3 | 664053.   | XXXXXXXX |
| La-ErizoSp    | 3 | 671020.   | XXXXXXXX |
| Can-EfJa      | 3 | 735454.   | XXXXXXXX |
| Can-Ogen2Is   | 3 | 788297.   | XXXXXXXX |
| Mom-MRIInd    | 3 | 952940.   | XX XXXXX |
| La-ZatIta     | 3 | 957152.   | X XXXXX  |
| In-LaBolasSp  | 3 | 973893.   | XXXXXX   |
| Am-AnaFran    | 3 | 1.00774E6 | XXXX     |
| Can-GyFran    | 2 | 1.03185E6 | XXXXXXXX |
| Can-VedFran   | 3 | 1.16686E6 | XXXX     |
| Dud-QAPMGeorg | 3 | 1.23613E6 | XXX      |
| Con-MielChi   | 3 | 1.23818E6 | XXX      |
| Can-SucrFran  | 3 | 1.67509E6 | XX       |
| In-TeSp       | 3 | 1.77441E6 | XXX      |
| In-TeNinvSp2  | 2 | 1.88603E6 | XXXX     |
| Can-NOFran    | 2 | 1.90475E6 | XXXX     |
| Can-GCHUSA    | 3 | 2.00714E6 | XXX      |
| La-OgenBul    | 3 | 2.5558E6  | XX       |
| Am-YokIs      | 2 | 2.83075E6 | X        |

#### LSD analysis for E.14 per accessions

Method: 95.0 percentage LSD

| <i>accessions</i> | <i>Cases</i> | <i>Mean</i> | <i>Homogeneous groups</i> |
|-------------------|--------------|-------------|---------------------------|
| In-PsPiñSp        | 3            | 750.0       | X                         |
| Ac-SVIInd         | 2            | 750.0       | XX                        |
| In-AmAoroSp       | 2            | 750.0       | XX                        |
| Con-FreeCJa       | 3            | 750.0       | X                         |
| Flex-Co20Ind      | 3            | 846.0       | X                         |
| Tibish-Ksud       | 3            | 2103.0      | X                         |
| In-CGBUSA         | 3            | 3154.67     | X                         |
| In-HoneyDewUSA    | 3            | 4167.67     | X                         |
| Ag-TendSud        | 3            | 5383.0      | X                         |
| Ac-SRKSLan        | 3            | 5557.0      | X                         |
| In-RoMoch1Sp      | 3            | 6030.67     | X                         |
| In-CrabPor        | 2            | 6515.0      | XX                        |
| Ac-TGR1551Zimb    | 3            | 6728.33     | X                         |
| Ag-WChInd         | 3            | 7354.33     | X                         |
| Ag-15591Gha       | 3            | 8320.67     | X                         |
| Con-ShiroJa       | 3            | 15927.3     | XX                        |
| chate-CarIta      | 1            | 16012.0     | XXXXX                     |
| Flex-SnakeSA      | 3            | 17058.0     | XX                        |
| In-BBredSp        | 3            | 18702.3     | XX                        |

|               |   |           |          |
|---------------|---|-----------|----------|
| Can-NCFran    | 2 | 25406.5   | XX       |
| Chi-VellInd   | 3 | 28561.7   | XX       |
| Con-MielChi   | 3 | 71717.3   | XX       |
| Con-PauPol    | 3 | 75068.3   | XX       |
| Ac-G22843Se   | 3 | 75261.3   | XX       |
| Con-GMJJa     | 3 | 77651.3   | XX       |
| Mom-KhaInd    | 3 | 77904.0   | XX       |
| In-AmCañSp    | 3 | 91272.7   | XX       |
| Con-BaishChi  | 3 | 105381.   | XX       |
| In-LaEscrSp   | 2 | 105626.   | XXX      |
| Dud-QPMAfg    | 3 | 110255.   | XX       |
| Can-EanaHun   | 3 | 116258.   | XX       |
| Am-HassanTur  | 3 | 156179.   | XX       |
| In-TeNinvSp   | 2 | 162850.   | XXXX     |
| Can-WiUSA     | 3 | 190262.   | XX       |
| Can-SucrFran  | 3 | 196879.   | XX       |
| Ag-CallInd    | 3 | 219952.   | XX       |
| Can-HBJUSA    | 3 | 244870.   | XX       |
| La-CascaPor   | 2 | 281959.   | XXXX     |
| Con-SCKo      | 3 | 300055.   | XXXX     |
| In-TDewUSA    | 3 | 303104.   | XXXX     |
| In-BBescrSp   | 3 | 315559.   | XXXX     |
| Am-KizilUzbe  | 3 | 358308.   | XXXX     |
| Flex-AryaInd  | 3 | 369710.   | XXXX     |
| Am-TokTaj     | 3 | 404946.   | XXXX     |
| Con-NanChi    | 3 | 469976.   | XXXX     |
| Can-GyFran    | 2 | 487091.   | XXXXXX   |
| La-ZatIta     | 3 | 530276.   | XXXX     |
| Can-PearlJa   | 3 | 694854.   | XXXXXX   |
| Can-SemUSA    | 2 | 741435.   | XXXXXXX  |
| Am-KafEgy     | 2 | 1.11955E6 | XXXXXXXX |
| In-ComunSp    | 2 | 1.1886E6  | XXXXXXXX |
| Mom-PII24Ind  | 3 | 1.21405E6 | XXXXXXXX |
| La-KroFran    | 4 | 1.31853E6 | XXXXXXXX |
| Am-korcaRus   | 3 | 1.34421E6 | XXXXXXXX |
| Can-TopUSA    | 3 | 1.49948E6 | XXXXXXXX |
| Can-VedFran   | 3 | 1.54924E6 | XXXXXXXX |
| Can-DulUSA    | 3 | 1.78423E6 | XXXXXXXX |
| Can-PGRFran   | 3 | 1.82783E6 | XXXXXXXX |
| Am-NesviGeor  | 3 | 1.83014E6 | XXXXXXXX |
| La-ErizoSp    | 3 | 2.13855E6 | XXXXXXXX |
| Can-EfJa      | 3 | 2.27723E6 | XXXXXX   |
| Can-Ogen2Is   | 3 | 2.48861E6 | XXXXXX   |
| Dud-QAPMGeorg | 3 | 2.56098E6 | XXXXXX   |
| Am-AnaFran    | 3 | 3.00767E6 | XXXXXX   |
| Mom-MR1Ind    | 3 | 3.08191E6 | XXXX     |
| In-LaBolasSp  | 3 | 3.24263E6 | XXX      |
| Can-NOFran    | 2 | 3.26577E6 | XXX      |
| In-TeNinvSp2  | 2 | 3.56877E6 | XXX      |
| In-TeSp       | 3 | 3.85843E6 | XX       |
| La-OgenBul    | 3 | 5.11617E6 | XX       |
| Can-GCHUSA    | 3 | 5.69599E6 | X        |
| Am-YokIs      | 2 | 5.89171E6 | X        |

#### LSD analysis for E.3 per accessions

Method: 95.0 percentage LSD

| <i>accessions</i> | <i>Cases</i> | <i>Mean</i> | <i>Homogeneous groups</i> |
|-------------------|--------------|-------------|---------------------------|
| Ac-TGR1551Zimb    | 3            | 750.0       | X                         |
| Flex-SnakeSA      | 3            | 750.0       | X                         |
| In-AmAoroSp       | 2            | 750.0       | X                         |
| Con-MielChi       | 3            | 750.0       | X                         |
| In-CGBUSA         | 3            | 750.0       | X                         |
| Can-NCFran        | 2            | 750.0       | X                         |
| Ac-SVInd          | 2            | 750.0       | X                         |
| In-HoneyDewUSA    | 3            | 750.0       | X                         |
| In-PsPiñSp        | 3            | 750.0       | X                         |
| Con-FreeCJa       | 3            | 750.0       | X                         |
| Ac-SRKSLan        | 3            | 750.0       | X                         |
| Tibish-Ksud       | 3            | 750.0       | X                         |
| Con-ShiroJa       | 3            | 750.0       | X                         |
| In-RoMoch1Sp      | 3            | 750.0       | X                         |
| In-CrabPor        | 2            | 750.0       | X                         |
| Ag-WChInd         | 3            | 750.0       | X                         |
| Flex-Co20Ind      | 3            | 750.0       | X                         |
| In-BBredSp        | 3            | 750.0       | X                         |
| Ag-TendSud        | 3            | 863.667     | X                         |
| Con-GMJJa         | 3            | 6008.33     | X                         |
| chate-Carlta      | 1            | 6344.0      | XX                        |
| Chi-VellInd       | 3            | 6668.0      | X                         |
| Mom-KhaInd        | 3            | 7408.33     | X                         |
| Con-PauPol        | 3            | 8775.0      | X                         |
| Ag-15591Gha       | 3            | 11202.0     | X                         |
| Con-BaishChi      | 3            | 13651.7     | X                         |
| Can-HBJUSA        | 3            | 14100.3     | X                         |
| Dud-QPMAfg        | 3            | 15209.7     | X                         |
| Ac-G22843Se       | 3            | 20035.7     | X                         |
| In-BBescrSp       | 3            | 20669.7     | X                         |
| Con-SCKo          | 3            | 21522.0     | X                         |
| In-TeNinvSp       | 2            | 22546.0     | X                         |
| Can-WiUSA         | 3            | 27015.0     | X                         |
| Con-NanChi        | 3            | 37488.3     | X                         |
| In-LaEscrSp       | 2            | 39854.0     | XX                        |
| In-AmCañSp        | 3            | 44747.7     | X                         |
| Can-SucrFran      | 3            | 46498.0     | X                         |
| Can-EanaHun       | 3            | 55010.7     | X                         |
| La-CascaPor       | 2            | 55698.5     | XX                        |
| In-TDewUSA        | 3            | 77086.7     | X                         |
| Am-HassanTur      | 3            | 87304.0     | X                         |
| Can-SemUSA        | 2            | 94106.5     | XX                        |
| Can-GyFran        | 2            | 98502.5     | XX                        |
| Can-TopUSA        | 3            | 106162.     | X                         |
| Ag-CallInd        | 3            | 119615.     | X                         |
| Am-KizilUzbe      | 3            | 121963.     | X                         |
| La-KroFran        | 4            | 163968.     | X                         |
| Am-TokTaj         | 3            | 169143.     | XX                        |
| Can-DulUSA        | 3            | 179730.     | XX                        |
| In-ComunSp        | 2            | 192058.     | XX                        |
| Am-AnaFran        | 3            | 200102.     | XX                        |
| La-ZatIta         | 3            | 225272.     | XX                        |
| Can-PGRFran       | 3            | 227890.     | XX                        |
| La-ErizoSp        | 3            | 231910.     | XX                        |
| Can-VedFran       | 3            | 237867.     | XX                        |
| Can-PearlJa       | 3            | 246937.     | XX                        |

|               |   |           |     |
|---------------|---|-----------|-----|
| Can-Ogen2Is   | 3 | 254599.   | XX  |
| Dud-QAPMGeorg | 3 | 345630.   | XX  |
| Am-korcaRus   | 3 | 358312.   | XX  |
| Am-KafEgy     | 2 | 372560.   | XX  |
| Mom-PII24Ind  | 3 | 439176.   | XX  |
| Can-EfJa      | 3 | 442416.   | XX  |
| In-LaBolasSp  | 3 | 466288.   | XX  |
| Flex-AryaInd  | 3 | 606755.   | XX  |
| Am-YokIs      | 2 | 611308.   | XX  |
| Can-GCHUSA    | 3 | 701703.   | XX  |
| Can-NOFran    | 2 | 855725.   | XXX |
| Am-NesviGeor  | 3 | 905973.   | XX  |
| In-TeSp       | 3 | 1.60474E6 | XX  |
| In-TeNinvSp2  | 2 | 1.60701E6 | XX  |
| Mom-MR1Ind    | 3 | 2.03605E6 | X   |
| La-OgenBul    | 3 | 2.2009E6  | X   |

#### LSD analysis for E.6 per accessions

Method: 95.0 percentage LSD

| <i>accessions</i> | <i>Cases</i> | <i>Mean</i> | <i>Homogeneous groups</i> |
|-------------------|--------------|-------------|---------------------------|
| chate-CarIta      | 1            | 750.0       | XXX                       |
| Mom-KhaInd        | 3            | 750.0       | X                         |
| In-CrabPor        | 2            | 750.0       | X                         |
| Ac-TGR1551Zimb    | 3            | 750.0       | X                         |
| Tibish-Ksud       | 3            | 750.0       | X                         |
| Ac-SRKSLan        | 3            | 750.0       | X                         |
| In-HoneyDewUSA    | 3            | 750.0       | X                         |
| In-AmAoroSp       | 2            | 750.0       | X                         |
| Ag-TendSud        | 3            | 750.0       | X                         |
| In-PsPiñSp        | 3            | 750.0       | X                         |
| Ac-SVIInd         | 2            | 750.0       | X                         |
| In-CGBUSA         | 3            | 750.0       | X                         |
| Con-FreeCJa       | 3            | 750.0       | X                         |
| Ag-15591Gha       | 3            | 750.0       | X                         |
| Flex-SnakeSA      | 3            | 750.0       | X                         |
| In-RoMoch1Sp      | 3            | 750.0       | X                         |
| Chi-VellInd       | 3            | 868.333     | X                         |
| Con-ShiroJa       | 3            | 1181.0      | X                         |
| Ac-G22843Se       | 3            | 1276.67     | X                         |
| Flex-Co20Ind      | 3            | 1635.0      | X                         |
| Ag-WChInd         | 3            | 1716.67     | X                         |
| Ag-CallInd        | 3            | 2717.33     | X                         |
| Can-NCFran        | 2            | 2919.5      | X                         |
| In-LaEscrSp       | 2            | 3470.0      | X                         |
| In-BBredSp        | 3            | 4077.67     | X                         |
| Con-GMJJa         | 3            | 4225.33     | X                         |
| Can-EanaHun       | 3            | 4537.0      | X                         |
| In-AmCañSp        | 3            | 6274.67     | X                         |
| Con-MielChi       | 3            | 8174.33     | X                         |
| Con-PauPol        | 3            | 8838.0      | X                         |
| In-TeNinvSp       | 2            | 10209.5     | XX                        |
| Am-TokTaj         | 3            | 10329.0     | X                         |
| Con-BaishChi      | 3            | 10464.0     | X                         |
| Can-WiUSA         | 3            | 10763.7     | X                         |
| Am-HassanTur      | 3            | 10795.3     | X                         |
| Dud-QPMAfg        | 3            | 10820.0     | X                         |



|               |   |         |     |
|---------------|---|---------|-----|
| In-TDewUSA    | 3 | 10935.0 | X   |
| Flex-AryaInd  | 3 | 11731.0 | X   |
| In-BBescrSp   | 3 | 12329.7 | X   |
| Con-SCKo      | 3 | 14611.3 | X   |
| Am-KizilUzbe  | 3 | 15857.0 | X   |
| Can-HBJUSA    | 3 | 19509.0 | X   |
| Can-SucrFran  | 3 | 22548.7 | X   |
| Con-NanChi    | 3 | 24803.3 | X   |
| Mom-PII24Ind  | 3 | 24947.0 | X   |
| La-CascaPor   | 2 | 35547.0 | XX  |
| La-ZatIta     | 3 | 50980.0 | XX  |
| Can-PearlJa   | 3 | 52682.3 | XX  |
| Am-KafEgy     | 2 | 58142.5 | XXX |
| Can-SemUSA    | 2 | 59240.5 | XXX |
| In-ComunSp    | 2 | 65382.0 | XXX |
| Can-GyFran    | 2 | 67195.0 | XXX |
| Am-korcaRus   | 3 | 69520.0 | XX  |
| La-ErizoSp    | 3 | 73094.3 | XX  |
| Can-PGRFran   | 3 | 89968.3 | XXX |
| In-TeSp       | 3 | 95014.7 | XXX |
| Mom-MR1Ind    | 3 | 96581.7 | XXX |
| Am-NesviGeor  | 3 | 99750.3 | XXX |
| Can-Ogen2Is   | 3 | 102194. | XXX |
| Can-TopUSA    | 3 | 108285. | XXX |
| Can-DulUSA    | 3 | 108360. | XXX |
| Can-VedFran   | 3 | 126072. | XXX |
| La-KroFran    | 4 | 139240. | XXX |
| Can-EfJa      | 3 | 158699. | XXX |
| In-LaBolasSp  | 3 | 165403. | XXX |
| Can-NOFran    | 2 | 256197. | XXX |
| Dud-QAPMGeorg | 3 | 313887. | XXX |
| Am-AnaFran    | 3 | 350641. | XX  |
| In-TeNinvSp2  | 2 | 601155. | XX  |
| Am-YokIs      | 2 | 664714. | XX  |
| Can-GCHUSA    | 3 | 676433. | XX  |
| La-OgenBul    | 3 | 921495. | X   |

#### LSD analysis for E.1 per accessions

Method: 95.0 percentage LSD

| <i>accessions</i> | <i>Cases</i> | <i>Mean</i> | <i>Homogeneous groups</i> |
|-------------------|--------------|-------------|---------------------------|
| In-LaBolasSp      | 3            | 750.0       | XX                        |
| In-TDewUSA        | 3            | 750.0       | XX                        |
| In-LaEscrSp       | 2            | 750.0       | XX                        |
| In-PsPiñSp        | 3            | 750.0       | XX                        |
| In-TeNinvSp       | 2            | 750.0       | XX                        |
| In-TeNinvSp2      | 2            | 750.0       | XX                        |
| In-RoMoch1Sp      | 3            | 750.0       | XX                        |
| Chi-VellInd       | 3            | 750.0       | XX                        |
| In-TeSp           | 3            | 750.0       | XX                        |
| Ac-TGR1551Zimb    | 3            | 750.0       | XX                        |
| Mom-KhaInd        | 3            | 750.0       | XX                        |
| Ac-SVIInd         | 2            | 750.0       | XX                        |
| Am-TokTaj         | 3            | 750.0       | XX                        |
| La-ErizoSp        | 3            | 750.0       | XX                        |
| Can-WiUSA         | 3            | 750.0       | XX                        |
| Con-GMJJa         | 3            | 750.0       | XX                        |

|                |   |         |    |
|----------------|---|---------|----|
| Am-AnaFran     | 3 | 750.0   | XX |
| Can-EfJa       | 3 | 750.0   | XX |
| Am-HassanTur   | 3 | 750.0   | XX |
| La-CascaPor    | 2 | 750.0   | XX |
| Tibish-Ksud    | 3 | 750.0   | XX |
| Con-BaishChi   | 3 | 750.0   | XX |
| Can-NOFran     | 2 | 750.0   | XX |
| Can-Ogen2Is    | 3 | 750.0   | XX |
| Am-NesviGeor   | 3 | 750.0   | XX |
| Can-PearlJa    | 3 | 750.0   | XX |
| Can-SemUSA     | 2 | 750.0   | XX |
| Can-SucrFran   | 3 | 750.0   | XX |
| Can-TopUSA     | 3 | 750.0   | XX |
| Can-VedFran    | 3 | 750.0   | XX |
| Mom-PII24Ind   | 3 | 750.0   | XX |
| Ac-SRKSLan     | 3 | 750.0   | XX |
| Can-DulUSA     | 3 | 750.0   | XX |
| Con-FreeCJa    | 3 | 750.0   | XX |
| Can-EanaHun    | 3 | 750.0   | XX |
| Con-MielChi    | 3 | 750.0   | XX |
| Con-NanChi     | 3 | 750.0   | XX |
| Con-PauPol     | 3 | 750.0   | XX |
| Con-SCKo       | 3 | 750.0   | XX |
| Con-ShiroJa    | 3 | 750.0   | XX |
| Can-GyFran     | 2 | 750.0   | XX |
| Dud-QPMAfg     | 3 | 750.0   | XX |
| Can-HBJUSA     | 3 | 750.0   | XX |
| Flex-Co20Ind   | 3 | 750.0   | XX |
| Can-NCFran     | 2 | 750.0   | XX |
| In-AmAoroSp    | 2 | 750.0   | XX |
| In-AmCañSp     | 3 | 750.0   | XX |
| In-BBescrSp    | 3 | 750.0   | XX |
| In-BBredSp     | 3 | 750.0   | XX |
| In-CGBUSA      | 3 | 750.0   | XX |
| In-ComunSp     | 2 | 750.0   | XX |
| In-CrabPor     | 2 | 750.0   | XX |
| In-HoneyDewUSA | 3 | 750.0   | XX |
| La-KroFran     | 4 | 754.5   | X  |
| Dud-QAPMGeorg  | 3 | 756.333 | XX |
| Ac-G22843Se    | 3 | 758.667 | XX |
| Can-GCHUSA     | 3 | 760.333 | XX |
| Am-KizilUzbe   | 3 | 783.0   | XX |
| Ag-TendSud     | 3 | 946.333 | XX |
| Am-YokIs       | 2 | 1013.0  | XX |
| Flex-SnakeSA   | 3 | 1083.67 | XX |
| chate-CarIta   | 1 | 1100.0  | XX |
| Ag-CallInd     | 3 | 1124.67 | XX |
| Ag-WChInd      | 3 | 1152.67 | XX |
| Flex-AryaInd   | 3 | 1374.33 | XX |
| Ag-15591Gha    | 3 | 2482.33 | XX |
| Can-PGRFran    | 3 | 3366.0  | XX |
| Am-korcaRus    | 3 | 3833.0  | XX |
| Am-KafEgy      | 2 | 4835.0  | XX |
| La-ZatIta      | 3 | 5839.67 | XX |
| La-OgenBul     | 3 | 13771.7 | X  |
| Mom-MR1Ind     | 3 | 73471.7 | X  |

# LSD analysis for E.12 per accessions

Method: 95.0 percentage LSD

| <i>accessions</i> | <i>Cases</i> | <i>Mean</i> | <i>Homogeneous groups</i> |
|-------------------|--------------|-------------|---------------------------|
| In-AmCañSp        | 3            | 750.0       | X                         |
| In-AmAoroSp       | 2            | 750.0       | X                         |
| In-CGBUSA         | 3            | 750.0       | X                         |
| In-BBredSp        | 3            | 750.0       | X                         |
| In-PsPiñSp        | 3            | 750.0       | X                         |
| In-BBescrSp       | 3            | 750.0       | X                         |
| Ag-CallInd        | 3            | 750.0       | X                         |
| In-TDewUSA        | 3            | 750.0       | X                         |
| In-CrabPor        | 2            | 750.0       | X                         |
| Ag-TendSud        | 3            | 750.0       | X                         |
| Ac-G22843Se       | 3            | 750.0       | X                         |
| Ac-TGR1551Zimb    | 3            | 750.0       | X                         |
| In-LaEscrSp       | 2            | 750.0       | X                         |
| In-RoMoch1Sp      | 3            | 750.0       | X                         |
| Can-PearlJa       | 3            | 750.0       | X                         |
| In-TeNinvSp       | 2            | 750.0       | X                         |
| Can-EanaHun       | 3            | 750.0       | X                         |
| Can-WiUSA         | 3            | 750.0       | X                         |
| Ag-15591Gha       | 3            | 750.0       | X                         |
| In-HoneyDewUSA    | 3            | 750.0       | X                         |
| Con-FreeCJa       | 3            | 750.0       | X                         |
| Can-NCFran        | 2            | 750.0       | X                         |
| Am-KizilUzbe      | 3            | 750.0       | X                         |
| Ac-SVIIInd        | 2            | 750.0       | X                         |
| Chi-VellInd       | 3            | 750.0       | X                         |
| Con-BaishChi      | 3            | 750.0       | X                         |
| Can-SemUSA        | 2            | 750.0       | X                         |
| Am-TokTaj         | 3            | 750.0       | X                         |
| Am-YokIs          | 2            | 750.0       | X                         |
| Can-TopUSA        | 3            | 750.0       | X                         |
| chate-CarIta      | 1            | 750.0       | XX                        |
| Ac-SRKSLan        | 3            | 750.0       | X                         |
| Tibish-Ksud       | 3            | 750.0       | X                         |
| Ag-WChInd         | 3            | 750.0       | X                         |
| Con-GMJJa         | 3            | 750.0       | X                         |
| Con-MielChi       | 3            | 750.0       | X                         |
| Con-NanChi        | 3            | 750.0       | X                         |
| Con-PauPol        | 3            | 750.0       | X                         |
| Con-SCKo          | 3            | 750.0       | X                         |
| Con-ShiroJa       | 3            | 750.0       | X                         |
| Mom-KhaInd        | 3            | 750.0       | X                         |
| Dud-QPMAfg        | 3            | 750.0       | X                         |
| Can-HBJUSA        | 3            | 750.0       | X                         |
| Flex-Co20Ind      | 3            | 750.0       | X                         |
| Flex-SnakeSA      | 3            | 750.0       | X                         |
| Can-SucrFran      | 3            | 1854.33     | X                         |
| Am-HassanTur      | 3            | 2012.67     | X                         |
| Can-VedFran       | 3            | 2298.0      | X                         |
| La-ErizoSp        | 3            | 2456.33     | X                         |
| Can-DulUSA        | 3            | 2476.67     | X                         |
| Dud-QAPMGeorg     | 3            | 3170.33     | X                         |
| Flex-AryaInd      | 3            | 3917.0      | X                         |
| Can-EfJa          | 3            | 4649.67     | X                         |

|              |   |         |    |
|--------------|---|---------|----|
| Mom-PII24Ind | 3 | 4669.67 | X  |
| Can-Ogen2Is  | 3 | 4828.0  | X  |
| La-CascaPor  | 2 | 5448.5  | XX |
| In-TeSp      | 3 | 6019.0  | XX |
| Am-AnaFran   | 3 | 6226.33 | XX |
| La-KroFran   | 4 | 7003.75 | XX |
| In-ComunSp   | 2 | 7847.0  | XX |
| Can-GCHUSA   | 3 | 9525.67 | XX |
| Am-KafEgy    | 2 | 12033.5 | XX |
| In-TeNinvSp2 | 2 | 13301.0 | XX |
| In-LaBolasSp | 3 | 13726.7 | XX |
| Can-PGRFran  | 3 | 14250.0 | XX |
| Can-NOFran   | 2 | 16990.0 | XX |
| Can-GyFran   | 2 | 17264.5 | XX |
| Am-NesviGeor | 3 | 21138.7 | XX |
| La-OgenBul   | 3 | 21757.7 | XX |
| La-ZatlIta   | 3 | 23003.0 | XX |
| Am-korcaRus  | 3 | 27642.3 | X  |
| Mom-MRIInd   | 3 | 98662.3 | X  |

#### LSD analysis for E.5 per accessions

Method: 95.0 percentage LSD

| <i>accessions</i> | <i>Cases</i> | <i>Mean</i> | <i>Homogeneous groups</i> |
|-------------------|--------------|-------------|---------------------------|
| Ac-SVInd          | 2            | 750.0       | X                         |
| Ac-TGR1551Zimb    | 3            | 750.0       | X                         |
| In-RoMoch1Sp      | 3            | 750.0       | X                         |
| In-PsPiñSp        | 3            | 750.0       | X                         |
| In-HoneyDewUSA    | 3            | 750.0       | X                         |
| In-CrabPor        | 2            | 750.0       | X                         |
| Tibish-Ksud       | 3            | 750.0       | X                         |
| Ac-SRKSLan        | 3            | 750.0       | X                         |
| Chi-VellInd       | 3            | 868.333     | X                         |
| Con-ShiroJa       | 3            | 1268.0      | X                         |
| Can-EanaHun       | 3            | 1276.67     | X                         |
| In-BBredSp        | 3            | 1370.33     | X                         |
| In-AmAoroSp       | 2            | 1448.0      | X                         |
| Can-NCFran        | 2            | 1677.5      | X                         |
| Con-FreeCJa       | 3            | 1963.0      | X                         |
| Flex-SnakeSA      | 3            | 2202.0      | X                         |
| Ag-TendSud        | 3            | 2342.67     | X                         |
| Con-GMJJa         | 3            | 2351.33     | X                         |
| Ag-WChInd         | 3            | 2374.67     | X                         |
| Ag-15591Gha       | 3            | 2400.67     | X                         |
| In-AmCañSp        | 3            | 2426.0      | X                         |
| Ac-G22843Se       | 3            | 3703.33     | X                         |
| Flex-Co20Ind      | 3            | 4033.0      | X                         |
| chate-CarIta      | 1            | 4237.0      | XXXX                      |
| Con-BaishChi      | 3            | 4315.33     | X                         |
| Con-SCKo          | 3            | 5183.67     | X                         |
| Mom-KhaInd        | 3            | 5753.0      | X                         |
| Dud-QPMAfg        | 3            | 7240.67     | X                         |
| Con-MielChi       | 3            | 7342.33     | X                         |
| Ag-CallInd        | 3            | 8121.67     | X                         |
| Can-WiUSA         | 3            | 8318.0      | X                         |
| In-LaEscrSp       | 2            | 9873.0      | XX                        |
| Con-PauPol        | 3            | 12827.3     | X                         |

|               |   |          |       |
|---------------|---|----------|-------|
| Can-HBJUSA    | 3 | 14362.7  | X     |
| In-TDewUSA    | 3 | 23166.3  | X     |
| Am-HassanTur  | 3 | 23421.7  | X     |
| In-CGBUSA     | 3 | 23610.3  | X     |
| In-TeNinvSp   | 2 | 25641.5  | XX    |
| Flex-AryaInd  | 3 | 27187.7  | X     |
| Am-KizilUzbe  | 3 | 27530.3  | X     |
| Can-SucrFran  | 3 | 29096.0  | X     |
| Am-TokTaj     | 3 | 37568.7  | X     |
| Can-PearlJa   | 3 | 47481.3  | X     |
| Can-SemUSA    | 2 | 52934.0  | XXX   |
| La-CascaPor   | 2 | 57470.0  | XXX   |
| Con-NanChi    | 3 | 58401.3  | X     |
| La-ZatIta     | 3 | 67019.0  | X     |
| In-BBescrSp   | 3 | 70851.3  | X     |
| Can-TopUSA    | 3 | 91541.0  | XX    |
| Can-GyFran    | 2 | 93464.0  | XXX   |
| Mom-PII24Ind  | 3 | 94697.7  | XX    |
| Can-DulUSA    | 3 | 123008.  | XXX   |
| Can-VedFran   | 3 | 123961.  | XXX   |
| In-ComunSp    | 2 | 128243.  | XXX   |
| La-KroFran    | 4 | 155343.  | XXX   |
| Can-Ogen2Is   | 3 | 173019.  | XXX   |
| Am-KafEgy     | 2 | 185425.  | XXXX  |
| Am-NesviGeor  | 3 | 209469.  | XXX   |
| Am-korcaRus   | 3 | 218663.  | XXX   |
| Can-EfJa      | 3 | 226384.  | XXXX  |
| La-ErizoSp    | 3 | 232627.  | XXXX  |
| Can-PGRFran   | 3 | 315907.  | XXXX  |
| In-TeSp       | 3 | 321713.  | XXXX  |
| Am-AnaFran    | 3 | 357732.  | XXXXX |
| Mom-MRIInd    | 3 | 432334.  | XXXXX |
| Can-NOFran    | 2 | 435265.  | XXXXX |
| Dud-QAPMGeorg | 3 | 471845.  | XXXXX |
| Can-GCHUSA    | 3 | 632206.  | XXXX  |
| Am-YokIs      | 2 | 735576.  | XXX   |
| In-LaBolasSp  | 3 | 777384.  | XX    |
| In-TeNinvSp2  | 2 | 959885.  | X     |
| La-OgenBul    | 3 | 1.8888E6 | X     |

#### LSD analysis for E.7 per accessions

Method: 95.0 percentage LSD

| <i>accessions</i> | <i>Cases</i> | <i>Mean</i> | <i>Homogeneous groups</i> |
|-------------------|--------------|-------------|---------------------------|
| Can-HBJUSA        | 3            | 750.0       | X                         |

|                |   |         |     |
|----------------|---|---------|-----|
| In-TDewUSA     | 3 | 750.0   | X   |
| Can-SemUSA     | 2 | 750.0   | XX  |
| Tibish-Ksud    | 3 | 750.0   | X   |
| Con-SCKo       | 3 | 750.0   | X   |
| Ac-SVIIInd     | 2 | 750.0   | XX  |
| Am-TokTaj      | 3 | 750.0   | X   |
| In-RoMoch1Sp   | 3 | 750.0   | X   |
| Con-BaishChi   | 3 | 750.0   | X   |
| In-AmAoroSp    | 2 | 750.0   | XX  |
| Can-EfJa       | 3 | 750.0   | X   |
| La-ZatIta      | 3 | 750.0   | X   |
| Can-NCFran     | 2 | 752.0   | XX  |
| In-LaEscrSp    | 2 | 755.0   | XX  |
| In-CrabPor     | 2 | 759.5   | XX  |
| Dud-QPMAfg     | 3 | 761.667 | X   |
| La-ErizoSp     | 3 | 770.667 | X   |
| Ac-SRKSLan     | 3 | 772.333 | X   |
| Ac-TGR1551Zimb | 3 | 772.333 | X   |
| Can-SucrFran   | 3 | 773.333 | X   |
| In-TeNinvSp    | 2 | 773.5   | XX  |
| Ag-TendSud     | 3 | 781.667 | X   |
| In-TeSp        | 3 | 782.333 | X   |
| Con-GMJJa      | 3 | 785.0   | X   |
| In-AmCañSp     | 3 | 791.0   | X   |
| In-HoneyDewUSA | 3 | 797.667 | X   |
| Con-PauPol     | 3 | 799.0   | X   |
| In-TeNinvSp2   | 2 | 800.0   | XX  |
| Ac-G22843Se    | 3 | 832.667 | X   |
| Am-KizilUzbe   | 3 | 835.667 | X   |
| Con-FreeCJa    | 3 | 839.0   | X   |
| Con-NanChi     | 3 | 842.333 | X   |
| Ag-15591Gha    | 3 | 852.667 | X   |
| In-ComunSp     | 2 | 858.0   | XX  |
| Con-ShiroJa    | 3 | 877.667 | X   |
| Can-WiUSA      | 3 | 883.0   | X   |
| In-BBredSp     | 3 | 891.333 | X   |
| Can-DulUSA     | 3 | 914.333 | X   |
| Ag-WChInd      | 3 | 915.333 | X   |
| Chi-VellInd    | 3 | 918.667 | X   |
| In-PsPiñSp     | 3 | 922.667 | X   |
| Am-HassanTur   | 3 | 929.667 | X   |
| Flex-SnakeSA   | 3 | 938.333 | X   |
| In-CGBUSA      | 3 | 946.0   | X   |
| Mom-PII24Ind   | 3 | 948.0   | X   |
| Flex-Co20Ind   | 3 | 953.333 | X   |
| Can-TopUSA     | 3 | 959.0   | X   |
| Ag-CallInd     | 3 | 962.333 | X   |
| Can-GyFran     | 2 | 1007.0  | XX  |
| Mom-KhaInd     | 3 | 1014.0  | XX  |
| Con-MielChi    | 3 | 1022.33 | XX  |
| Can-EanaHun    | 3 | 1057.0  | XX  |
| In-BBescrSp    | 3 | 1065.67 | XX  |
| chate-CarIta   | 1 | 1091.0  | XXX |
| Flex-AryaInd   | 3 | 1231.67 | XX  |
| Can-PearlJa    | 3 | 1398.0  | XX  |
| Can-VedFran    | 3 | 1419.33 | XX  |
| Can-PGRFran    | 3 | 1508.33 | XX  |

|               |   |         |      |
|---------------|---|---------|------|
| Mom-MR1Ind    | 3 | 1524.0  | XX   |
| La-CascaPor   | 2 | 3590.5  | XXX  |
| Am-KafEgy     | 2 | 4039.5  | XXX  |
| Am-korcaRus   | 3 | 4515.67 | XXX  |
| Am-NesviGeor  | 3 | 4919.67 | XXX  |
| Can-Ogen2Is   | 3 | 5535.33 | XXX  |
| Can-NOFran    | 2 | 8212.5  | XXXX |
| Dud-QAPMGeorg | 3 | 9385.33 | XXXX |
| In-LaBolasSp  | 3 | 10411.7 | XXX  |
| La-KroFran    | 4 | 11159.8 | XX   |
| Am-AnaFran    | 3 | 15349.3 | X    |
| Can-GCHUSA    | 3 | 18118.7 | X    |
| Am-YokIs      | 2 | 19236.5 | X    |
| La-OgenBul    | 3 | 33262.7 | X    |

### LSD analysis for E.9 per accessions

Method: 95.0 percentage LSD

| <i>accessions</i> | <i>Cases</i> | <i>Mean</i> | <i>Homogeneous groups</i> |
|-------------------|--------------|-------------|---------------------------|
| Con-FreeCJa       | 3            | 750.0       | X                         |
| In-TeNinvSp2      | 2            | 750.0       | X                         |
| Can-EanaHun       | 3            | 750.0       | X                         |
| Con-NanChi        | 3            | 750.0       | X                         |
| Con-MielChi       | 3            | 750.0       | X                         |
| Ag-WChInd         | 3            | 750.0       | X                         |
| In-HoneyDewUSA    | 3            | 750.0       | X                         |
| In-LaEscrSp       | 2            | 750.0       | X                         |
| In-AmCañSp        | 3            | 750.0       | X                         |
| Con-PauPol        | 3            | 750.0       | X                         |
| Tibish-Ksud       | 3            | 750.0       | X                         |
| Con-SCKo          | 3            | 750.0       | X                         |
| Can-NCFran        | 2            | 750.0       | X                         |
| In-ComunSp        | 2            | 750.0       | X                         |
| In-AmAoroSp       | 2            | 750.0       | X                         |
| Mom-PII24Ind      | 3            | 750.0       | X                         |
| Con-GMJJa         | 3            | 750.0       | X                         |
| Ac-G22843Se       | 3            | 750.0       | X                         |
| Ac-SRKSLan        | 3            | 750.0       | X                         |
| In-RoMoch1Sp      | 3            | 750.0       | X                         |
| Ac-TGR1551Zimb    | 3            | 750.0       | X                         |
| In-CrabPor        | 2            | 750.0       | X                         |
| Con-BaishChi      | 3            | 750.0       | X                         |
| Can-VedFran       | 3            | 750.0       | X                         |
| In-BBredSp        | 3            | 750.0       | X                         |
| Con-ShiroJa       | 3            | 750.0       | X                         |
| In-TDewUSA        | 3            | 750.0       | X                         |
| Ac-SVIInd         | 2            | 750.0       | X                         |
| Can-WiUSA         | 3            | 750.0       | X                         |
| In-TeNinvSp       | 2            | 750.0       | X                         |
| In-BBescrSp       | 3            | 750.0       | X                         |
| In-TeSp           | 3            | 750.0       | X                         |
| Can-PearlJa       | 3            | 751.667     | X                         |
| La-ErizoSp        | 3            | 759.667     | X                         |
| Can-HBJUSA        | 3            | 767.0       | X                         |
| Am-NesviGeor      | 3            | 768.667     | X                         |
| Flex-SnakeSA      | 3            | 770.0       | X                         |
| Am-HassanTur      | 3            | 794.0       | X                         |

|               |   |         |     |
|---------------|---|---------|-----|
| Am-KizilUzbe  | 3 | 828.667 | X   |
| Ag-CallInd    | 3 | 859.0   | X   |
| Am-TokTaj     | 3 | 884.0   | X   |
| Chi-VellInd   | 3 | 890.0   | X   |
| Mom-KhaInd    | 3 | 904.0   | X   |
| Ag-TendSud    | 3 | 909.0   | X   |
| In-LaBolasSp  | 3 | 930.0   | X   |
| Ag-15591Gha   | 3 | 967.667 | X   |
| chate-CarIta  | 1 | 1007.0  | XX  |
| Flex-Co20Ind  | 3 | 1051.0  | X   |
| In-PsPiñSp    | 3 | 1188.33 | X   |
| Flex-AryaInd  | 3 | 1346.0  | X   |
| In-CGBUSA     | 3 | 1544.67 | X   |
| Can-GyFran    | 2 | 1552.0  | X   |
| Dud-QPMAfg    | 3 | 3569.67 | X   |
| Can-DulUSA    | 3 | 5556.0  | X   |
| La-KroFran    | 4 | 6842.5  | X   |
| La-ZatIta     | 3 | 7066.33 | X   |
| Can-TopUSA    | 3 | 7696.0  | X   |
| Can-SucrFran  | 3 | 9650.33 | X   |
| Can-NOFran    | 2 | 9711.0  | X   |
| Am-korcaRus   | 3 | 12247.7 | X   |
| Am-KafEgy     | 2 | 12294.5 | XX  |
| La-CascaPor   | 2 | 12776.0 | XX  |
| Can-SemUSA    | 2 | 16706.5 | XX  |
| Can-Ogen2Is   | 3 | 19117.0 | XX  |
| Can-PGRFran   | 3 | 24678.3 | XXX |
| Dud-QAPMGeorg | 3 | 26981.3 | XXX |
| Can-EfJa      | 3 | 30392.0 | XXX |
| Am-YokIs      | 2 | 30744.5 | XXX |
| Can-GCHUSA    | 3 | 51409.7 | XX  |
| Am-AnaFran    | 3 | 59972.3 | XX  |
| La-OgenBul    | 3 | 95796.3 | XX  |
| Mom-MR1Ind    | 3 | 113155. | X   |

#### LSD analysis for E.11 per accessions

Method: 95.0 percentage LSD

| <i>accessions</i> | <i>Cases</i> | <i>Mean</i> | <i>Homogeneous groups</i> |
|-------------------|--------------|-------------|---------------------------|
| In-CrabPor        | 2            | 750.0       | X                         |
| Con-GMJJa         | 3            | 750.0       | X                         |
| Con-MielChi       | 3            | 750.0       | X                         |
| Con-ShiroJa       | 3            | 750.0       | X                         |
| Can-GyFran        | 2            | 750.0       | X                         |
| Flex-Co20Ind      | 3            | 750.0       | X                         |
| Con-SCKo          | 3            | 750.0       | X                         |
| chate-CarIta      | 1            | 750.0       | XXXX                      |
| Con-FreeCJa       | 3            | 750.0       | X                         |
| Flex-SnakeSA      | 3            | 750.0       | X                         |
| Dud-QPMAfg        | 3            | 750.0       | X                         |
| Ag-WChInd         | 3            | 750.0       | X                         |
| In-AmAoroSp       | 2            | 750.0       | X                         |
| Chi-VellInd       | 3            | 750.0       | X                         |
| In-HoneyDewUSA    | 3            | 750.0       | X                         |
| In-CGBUSA         | 3            | 750.0       | X                         |
| Can-EanaHun       | 3            | 750.0       | X                         |
| Ac-SV1Ind         | 2            | 750.0       | X                         |



|                |   |         |        |
|----------------|---|---------|--------|
| Am-HassanTur   | 3 | 750.0   | X      |
| Ag-15591Gha    | 3 | 750.0   | X      |
| Ag-TendSud     | 3 | 750.0   | X      |
| Can-NCFran     | 2 | 750.0   | X      |
| In-PsPiñSp     | 3 | 750.0   | X      |
| Can-WiUSA      | 3 | 750.0   | X      |
| Ac-SRKSLan     | 3 | 750.0   | X      |
| Tibish-Ksud    | 3 | 750.0   | X      |
| In-AmCañSp     | 3 | 750.0   | X      |
| In-RoMoch1Sp   | 3 | 750.0   | X      |
| In-TDewUSA     | 3 | 750.0   | X      |
| Ac-G22843Se    | 3 | 750.0   | X      |
| Con-BaishChi   | 3 | 750.0   | X      |
| Mom-KhaInd     | 3 | 750.0   | X      |
| Ac-TGR1551Zimb | 3 | 750.0   | X      |
| Con-PauPol     | 3 | 1511.67 | X      |
| In-BBredSp     | 3 | 1517.0  | X      |
| In-LaEscrSp    | 2 | 1763.5  | XX     |
| In-TeNinvSp    | 2 | 2267.0  | XX     |
| Con-NanChi     | 3 | 2320.33 | X      |
| Can-HBJUSA     | 3 | 2438.67 | X      |
| Flex-AryaInd   | 3 | 2789.67 | X      |
| Can-PearlJa    | 3 | 2818.67 | X      |
| Ag-CallInd     | 3 | 3430.0  | X      |
| Can-SemUSA     | 2 | 3566.0  | XXX    |
| Am-TokTaj      | 3 | 4830.67 | X      |
| Mom-PI124Ind   | 3 | 5097.67 | X      |
| Can-TopUSA     | 3 | 5635.0  | X      |
| Am-KizilUzbe   | 3 | 5793.33 | X      |
| In-BBescrSp    | 3 | 5849.67 | X      |
| La-ZatIta      | 3 | 6723.67 | XX     |
| Can-VedFran    | 3 | 8408.0  | XXX    |
| Can-SucrFran   | 3 | 8679.0  | XXX    |
| Can-EfJa       | 3 | 10910.3 | XXX    |
| Can-DulUSA     | 3 | 12068.0 | XXX    |
| In-ComunSp     | 2 | 12928.5 | XXXX   |
| La-ErizoSp     | 3 | 15743.7 | XXXX   |
| In-TeSp        | 3 | 16707.7 | XXXX   |
| La-CascaPor    | 2 | 21564.0 | XXXXXX |
| In-TeNinvSp2   | 2 | 21858.0 | XXXXXX |
| Am-KafEgy      | 2 | 23876.5 | XXXXXX |
| La-KroFran     | 4 | 28325.5 | XXXXXX |
| Am-NesviGeor   | 3 | 30979.0 | XXXXXX |
| Dud-QAPMGeorg  | 3 | 31703.3 | XXXXXX |
| Can-PGRFran    | 3 | 34248.7 | XXXXXX |
| Can-Ogen2Is    | 3 | 34269.0 | XXXXXX |
| Can-NOFran     | 2 | 36175.0 | XXXXXX |
| Am-korcaRus    | 3 | 38152.0 | XXXXXX |
| Am-AnaFran     | 3 | 45949.7 | XXXX   |
| Can-GCHUSA     | 3 | 47775.7 | XXX    |
| Mom-MR1Ind     | 3 | 53892.0 | XX     |
| Am-YokIs       | 2 | 61670.0 | X      |
| La-OgenBul     | 3 | 112361. | X      |
| In-LaBolasSp   | 3 | 114284. | X      |

LSD analysis for E.2 per accessions

Method: 95.0 percentage LSD

| <i>accessions</i> | <i>Cases</i> | <i>Mean</i> | <i>Homogeneous groups</i> |
|-------------------|--------------|-------------|---------------------------|
| Can-GyFran        | 2            | 21732.0     | XX                        |
| Can-SemUSA        | 2            | 23171.5     | XX                        |
| Am-YokIs          | 2            | 27548.5     | XX                        |
| In-BBredSp        | 3            | 30609.0     | X                         |
| In-LaEscrSp       | 2            | 36707.5     | XXX                       |
| La-OgenBul        | 3            | 40152.7     | XX                        |
| Can-WiUSA         | 3            | 42255.7     | XX                        |
| In-CrabPor        | 2            | 42458.0     | XXX                       |
| Am-KizilUzbe      | 3            | 42690.0     | XX                        |
| Am-KafEgy         | 2            | 43320.5     | XXX                       |
| In-TeNinvSp       | 2            | 44122.5     | XXX                       |
| In-PsPiñSp        | 3            | 44418.7     | XX                        |
| Can-DulUSA        | 3            | 44725.7     | XX                        |
| Ag-15591Gha       | 3            | 45239.3     | XX                        |
| Mom-MR1Ind        | 3            | 45917.7     | XXX                       |
| In-BBescrSp       | 3            | 46054.7     | XXX                       |
| Can-Ogen2Is       | 3            | 47567.3     | XXX                       |
| Ag-CallInd        | 3            | 47662.7     | XXX                       |
| In-AmCañSp        | 3            | 48218.3     | XXX                       |
| Ac-G22843Se       | 3            | 48364.0     | XXX                       |
| Con-BaishChi      | 3            | 53022.0     | XXX                       |
| Can-TopUSA        | 3            | 53899.7     | XXX                       |
| In-TeNinvSp2      | 2            | 54242.0     | XXX                       |
| Mom-PI124Ind      | 3            | 54457.0     | XXX                       |
| In-LaBolasSp      | 3            | 56095.3     | XXX                       |
| Ac-SRKSLan        | 3            | 56190.7     | XXX                       |
| Dud-QAPMGeorg     | 3            | 59079.7     | XXX                       |
| Con-FreeCJa       | 3            | 61009.7     | XXX                       |
| In-AmAoroSp       | 2            | 61254.0     | XXX                       |
| Ac-SVIIInd        | 2            | 62474.0     | XXX                       |
| Flex-Co20Ind      | 3            | 62840.0     | XXX                       |
| Chi-VellInd       | 3            | 63118.3     | XXX                       |
| Am-AnaFran        | 3            | 63985.7     | XXX                       |
| Con-GMJa          | 3            | 65344.0     | XXX                       |
| Am-HassanTur      | 3            | 65437.0     | XXX                       |
| La-CascaPor       | 2            | 65523.5     | XXX                       |
| Con-NanChi        | 3            | 70958.3     | XXX                       |
| Can-EfJa          | 3            | 71662.3     | XXX                       |
| Can-PearlJa       | 3            | 76044.0     | XXX                       |
| In-TeSp           | 3            | 79114.3     | XXX                       |
| Can-GCHUSA        | 3            | 79568.3     | XXX                       |
| Am-TokTaj         | 3            | 83770.7     | XXX                       |
| Con-MielChi       | 3            | 84934.0     | XXX                       |
| Can-HBJUSA        | 3            | 85232.7     | XXX                       |
| Mom-KhaInd        | 3            | 85624.3     | XXX                       |
| Con-SCKo          | 3            | 86275.0     | XXX                       |
| Can-PGRFran       | 3            | 86384.0     | XXX                       |
| La-ErizoSp        | 3            | 87316.3     | XXX                       |
| La-ZatIta         | 3            | 89981.0     | XXX                       |
| Con-PauPol        | 3            | 93501.7     | XXX                       |
| Can-NCFran        | 2            | 98522.0     | XXXX                      |
| Con-ShiroJa       | 3            | 102713.     | XXX                       |
| Ag-WChInd         | 3            | 108478.     | XXXX                      |
| In-CGBUSA         | 3            | 109039.     | XXXX                      |
| In-TDewUSA        | 3            | 110298.     | XXXX                      |

|                |   |         |      |
|----------------|---|---------|------|
| Can-EanaHun    | 3 | 114277. | XXXX |
| Tibish-Ksud    | 3 | 114461. | XXXX |
| In-HoneyDewUSA | 3 | 118237. | XXXX |
| Ag-TendSud     | 3 | 119375. | XXXX |
| Am-korcaRus    | 3 | 119502. | XXXX |
| Flex-SnakeSA   | 3 | 119757. | XXXX |
| In-RoMoch1Sp   | 3 | 120369. | XXXX |
| La-KroFran     | 4 | 124447. | XXXX |
| Am-NesviGeor   | 3 | 125834. | XXXX |
| Can-NOFran     | 2 | 129232. | XXXX |
| Dud-QPMAfg     | 3 | 137564. | XXX  |
| Can-SucrFran   | 3 | 138959. | XXX  |
| Can-VedFran    | 3 | 152297. | XX   |
| Ac-TGR1551Zimb | 3 | 211819. | XX   |
| In-ComunSp     | 2 | 291741. | XX   |
| Flex-AryaInd   | 3 | 298124. | XX   |
| chate-CarIta   | 1 | 406293. | X    |

#### LSD analysis for EE.10 per accessions

Method: 95.0 percentage LSD

| <i>accessions</i> | <i>Cases</i> | <i>Mean</i> | <i>Homogeneous groups</i> |
|-------------------|--------------|-------------|---------------------------|
| In-PsPiñSp        | 3            | 750.0       | X                         |
| Ac-SVIIInd        | 2            | 750.0       | XXX                       |
| Con-FreeCJa       | 3            | 750.0       | X                         |
| Chi-VellInd       | 3            | 750.0       | X                         |
| Ac-TGR1551Zimb    | 3            | 750.0       | X                         |
| In-CGBUSA         | 3            | 750.0       | X                         |
| Ag-WChInd         | 3            | 750.0       | X                         |
| Tibish-Ksud       | 3            | 750.0       | X                         |
| In-CrabPor        | 2            | 750.0       | XXX                       |
| Ac-SRKSLan        | 3            | 750.0       | X                         |
| In-AmAoroSp       | 2            | 750.0       | XXX                       |
| Ag-CallInd        | 3            | 934.333     | X                         |
| In-HoneyDewUSA    | 3            | 1436.67     | X                         |
| chate-CarIta      | 1            | 1618.0      | XXXXXXXXXX                |
| In-BBredSp        | 3            | 2292.0      | X                         |
| In-BBescrSp       | 3            | 4002.33     | X                         |
| In-TDewUSA        | 3            | 4911.33     | X                         |
| In-TeNinvSp2      | 2            | 5602.5      | XXXX                      |
| Flex-Co20Ind      | 3            | 6372.33     | X X                       |
| Am-TokTaj         | 3            | 6673.33     | X X                       |
| Can-SemUSA        | 2            | 6758.5      | XXXXXX                    |
| In-RoMoch1Sp      | 3            | 7193.0      | XXX                       |
| Flex-AryaInd      | 3            | 7743.0      | XXX                       |
| In-TeNinvSp       | 2            | 8028.0      | XXXXXX                    |
| Con-ShiroJa       | 3            | 8205.67     | XXX                       |
| Ag-TendSud        | 3            | 8792.0      | XXX                       |
| Con-NanChi        | 3            | 10027.7     | XXX                       |
| Flex-SnakeSA      | 3            | 10232.3     | XXX                       |
| Can-NCFran        | 2            | 13544.5     | XXXXXX                    |
| Con-PauPol        | 3            | 14116.3     | XXXXXX                    |
| Can-HBJUSA        | 3            | 17631.7     | XXXXXX                    |
| La-ErizoSp        | 3            | 20256.0     | XXXXXX                    |
| In-LaBolasSp      | 3            | 20672.3     | XXXXXX                    |
| Am-HassanTur      | 3            | 24450.7     | XXXXXX                    |
| Dud-QPMAfg        | 3            | 25381.0     | XXXXXX                    |

|               |   |         |               |
|---------------|---|---------|---------------|
| Con-SCKo      | 3 | 30081.3 | XXXXXXXXXX    |
| La-KroFran    | 4 | 30789.3 | XXXXXXXXXX    |
| Am-korcaRus   | 3 | 31568.7 | XXXXXXXXXX    |
| Can-PGRFran   | 3 | 32154.3 | XXXXXXXXXX    |
| Con-MielChi   | 3 | 33365.0 | XXXXXXXXXX    |
| Con-GMJJa     | 3 | 34909.7 | XXXXXXXXXX    |
| Am-KizilUzbe  | 3 | 37135.3 | XXXXXXXXXX    |
| Mom-PII24Ind  | 3 | 38789.3 | XXXXXXXXXX    |
| Am-NesviGeor  | 3 | 43182.7 | XXXXXXXXXX    |
| La-OgenBul    | 3 | 46280.3 | XXXXXXXXXX    |
| Dud-QAPMGeorg | 3 | 48165.7 | XXXXXXXXXX    |
| Am-AnaFran    | 3 | 48853.0 | XXXXXXXXXX    |
| Mom-KhaInd    | 3 | 49553.3 | XXXXXXXXXX    |
| Can-GCHUSA    | 3 | 49813.3 | XXXXXXXXXX    |
| Can-EanaHun   | 3 | 53432.3 | XXXXXXXXXX    |
| Ac-G22843Se   | 3 | 56714.7 | XXXXXXXXXXXX  |
| In-AmCañSp    | 3 | 57083.3 | XXXXXXXXXXXX  |
| Can-PearlJa   | 3 | 70533.0 | X XXXXXXXXXXX |
| Con-BaishChi  | 3 | 74781.3 | XXXXXXXXXXXX  |
| In-ComunSp    | 2 | 76360.0 | XXXXXXXXXXXX  |
| Can-EfJa      | 3 | 76712.7 | XXXXXXXXXXXX  |
| Can-DulUSA    | 3 | 82111.3 | XXXXXXXXXX    |
| Can-Ogen2Is   | 3 | 83261.3 | XXXXXXXXXX    |
| Mom-MR1Ind    | 3 | 86750.0 | XXXXXXXXXX    |
| In-LaEscrSp   | 2 | 95540.5 | XXXXXXX       |
| Am-KafEgy     | 2 | 96998.0 | XXXXXX        |
| Can-VedFran   | 3 | 111207. | XXXX          |
| Can-NOFran    | 2 | 113567. | XXXXXX        |
| Can-WiUSA     | 3 | 114606. | XXXX          |
| In-TeSp       | 3 | 118959. | XXX           |
| Can-TopUSA    | 3 | 127921. | XXX           |
| La-ZatIta     | 3 | 130064. | XXX           |
| Can-GyFran    | 2 | 184282. | XXX           |
| La-CascaPor   | 2 | 193043. | XXX           |
| Am-YokIs      | 2 | 252526. | XXX           |
| Can-SucrFran  | 3 | 261427. | XX            |
| Ag-15591Gha   | 3 | 281758. | X             |

#### LSD analysis for EE.2 per accessions

Method: 95.0 percentage LSD

| <i>accessions</i> | <i>Cases</i> | <i>Mean</i> | <i>Homogeneous groups</i> |
|-------------------|--------------|-------------|---------------------------|
| Flex-Co20Ind      | 3            | 750.0       | X                         |
| In-HoneyDewUSA    | 3            | 750.0       | X                         |
| In-CGBUSA         | 3            | 750.0       | X                         |
| Ag-WChInd         | 3            | 750.0       | X                         |
| Ag-CallInd        | 3            | 750.0       | X                         |
| Tibish-Ksud       | 3            | 750.0       | X                         |
| Ac-SVIIInd        | 2            | 750.0       | XX                        |
| Con-FreeCJa       | 3            | 750.0       | X                         |
| In-AmAoroSp       | 2            | 750.0       | XX                        |
| In-PsPiñSp        | 3            | 750.0       | X                         |
| Ac-TGR1551Zimb    | 3            | 750.0       | X                         |
| chate-CarIta      | 1            | 750.0       | XXXXXX                    |
| Ac-SRKSLan        | 3            | 750.0       | X                         |
| Flex-AryaInd      | 3            | 782.0       | X                         |
| In-TeNinvSp       | 2            | 786.5       | XX                        |

|               |   |         |          |
|---------------|---|---------|----------|
| Flex-SnakeSA  | 3 | 839.0   | X        |
| In-BBescrSp   | 3 | 848.667 | X        |
| Ag-TendSud    | 3 | 858.333 | X        |
| Chi-VellInd   | 3 | 893.667 | X        |
| Ag-15591Gha   | 3 | 2897.0  | X        |
| Mom-MR1Ind    | 3 | 3687.67 | X        |
| In-CrabPor    | 2 | 3723.5  | XX X     |
| In-BBredSp    | 3 | 3727.0  | X        |
| Am-TokTaj     | 3 | 3818.67 | X        |
| Ac-G22843Se   | 3 | 6662.0  | X        |
| In-TDewUSA    | 3 | 6828.33 | X        |
| Con-PauPol    | 3 | 9365.33 | X        |
| Mom-PI124Ind  | 3 | 9863.33 | X        |
| Con-ShiroJa   | 3 | 10328.0 | X        |
| Con-NanChi    | 3 | 10859.3 | X        |
| In-LaBolasSp  | 3 | 11558.3 | X        |
| In-TeNinvSp2  | 2 | 12900.0 | XXXX     |
| Can-SemUSA    | 2 | 14026.0 | XXXX     |
| Can-NCFran    | 2 | 15198.5 | XXXX     |
| Am-KizilUzbe  | 3 | 19328.7 | XX X     |
| Mom-KhaInd    | 3 | 24355.3 | XX X     |
| In-RoMoch1Sp  | 3 | 25528.0 | XXXX     |
| Can-PGRFran   | 3 | 26677.3 | XXXX     |
| Can-EanaHun   | 3 | 26713.3 | XXXX     |
| Con-GMJJa     | 3 | 29348.3 | XXXX     |
| Am-korcaRus   | 3 | 30117.7 | XXXX     |
| Am-NesviGeor  | 3 | 32952.3 | XXXX     |
| La-ErizoSp    | 3 | 33735.7 | XXXX     |
| La-KroFran    | 4 | 34665.0 | XXXX     |
| Dud-QMAfg     | 3 | 35285.7 | XXXX     |
| Can-GCHUSA    | 3 | 35833.7 | XXXX     |
| Can-HBJUSA    | 3 | 42462.3 | XXXX X   |
| Am-HassanTur  | 3 | 50644.3 | XXXX X   |
| Con-SCKo      | 3 | 52621.0 | XXXX X   |
| Dud-QAPMGeorg | 3 | 71447.0 | XXXXXXX  |
| Can-WiUSA     | 3 | 74460.3 | XXXXXXXX |
| Con-MielChi   | 3 | 75428.3 | XXXXXXXX |
| In-LaEscrSp   | 2 | 84015.0 | XXXXXXXX |
| Am-KafEgy     | 2 | 106810. | XXXXXXXX |
| Con-BaishChi  | 3 | 109131. | XXXXXXXX |
| La-OgenBul    | 3 | 116665. | XXXXXXXX |
| In-TeSp       | 3 | 124252. | XXXXXXXX |
| Can-DulUSA    | 3 | 163573. | XXXXXXXX |
| Am-AnaFran    | 3 | 172314. | X XXXXX  |
| Can-NOFran    | 2 | 183086. | XXXXXXXX |
| Can-EfJa      | 3 | 205999. | X XXXXX  |
| In-ComunSp    | 2 | 206619. | XXXXXXXX |
| In-AmCañSp    | 3 | 220636. | XXXXX    |
| Can-PearlJa   | 3 | 249707. | XXXXX    |
| Can-SucrFran  | 3 | 294121. | XXXXX    |
| Can-Ogen2Is   | 3 | 320393. | XXXX     |
| Can-TopUSA    | 3 | 327458. | XXXX     |
| Can-VedFran   | 3 | 348736. | XXX      |
| La-ZatIta     | 3 | 371862. | XX       |
| Am-YokIs      | 2 | 407873. | XXX      |
| Can-GyFran    | 2 | 418774. | XX       |
| La-CascaPor   | 2 | 556793. | X        |

# **LSD analysis for EE.7 per accessions**

Method: 95.0 percentage LSD

| <i>accessions</i> | <i>Cases</i> | <i>Mean</i> | <i>Homogeneous groups</i> |
|-------------------|--------------|-------------|---------------------------|
| Ag-WChInd         | 3            | 750.0       | X                         |
| In-PsPiñSp        | 3            | 750.0       | X                         |
| In-CGBUSA         | 3            | 750.0       | X                         |
| Tibish-Ksud       | 3            | 750.0       | X                         |
| Ac-SRKSLan        | 3            | 750.0       | X                         |
| Ac-TGR1551Zimb    | 3            | 2344.0      | X                         |
| Con-FreeCJa       | 3            | 2873.67     | X                         |
| Ac-SVIIInd        | 2            | 3321.0      | XXX                       |
| Flex-Co20Ind      | 3            | 3516.0      | X                         |
| In-HoneyDewUSA    | 3            | 3826.67     | X                         |
| Chi-VellInd       | 3            | 4202.0      | X                         |
| Ag-CalInd         | 3            | 5531.67     | X                         |
| Ag-TendSud        | 3            | 6409.33     | X                         |
| In-AmAoroSp       | 2            | 6828.5      | XXX                       |
| In-BBescrSp       | 3            | 6862.0      | X                         |
| In-RoMoch1Sp      | 3            | 7412.33     | X                         |
| In-CrabPor        | 2            | 7444.5      | XXX                       |
| In-BBredSp        | 3            | 8521.33     | X                         |
| chate-Carlta      | 1            | 10328.0     | XXXXXXXX                  |
| Can-SemUSA        | 2            | 14900.5     | XXX                       |
| In-TDewUSA        | 3            | 18657.0     | X                         |
| In-TeNinvSp2      | 2            | 20917.0     | XXX                       |
| Am-TokTaj         | 3            | 31733.7     | X X                       |
| Flex-AryaInd      | 3            | 44110.7     | X X                       |
| Can-HBJUSA        | 3            | 52085.0     | X X                       |
| In-TeNinvSp       | 2            | 53877.5     | XXX                       |
| Am-HassanTur      | 3            | 63209.3     | X X                       |
| La-ErizoSp        | 3            | 67923.3     | X X                       |
| Flex-SnakeSA      | 3            | 70927.0     | X X                       |
| Con-ShiroJa       | 3            | 75936.3     | X X                       |
| In-AmCañSp        | 3            | 80598.0     | X X                       |
| Con-GMJJa         | 3            | 90648.3     | XXX                       |
| Am-korcaRus       | 3            | 137164.     | XXX                       |
| Ac-G22843Se       | 3            | 154346.     | XXX                       |
| Mom-PII24Ind      | 3            | 162917.     | XXX                       |
| Can-PearlJa       | 3            | 188685.     | XXXX                      |
| In-LaBolasSp      | 3            | 194535.     | XXXX                      |
| Con-NanChi        | 3            | 201866.     | XXXXX                     |
| Am-NesviGeor      | 3            | 250247.     | XXXXX                     |
| Con-SCKo          | 3            | 251907.     | XXXXX                     |
| Can-NCFran        | 2            | 257511.     | XXXXXXXX                  |
| Dud-QPMAfg        | 3            | 269668.     | XXXXXX                    |
| Con-PauPol        | 3            | 306912.     | XXXXXX                    |
| In-LaEscrSp       | 2            | 314853.     | XXXXXX                    |
| Con-MielChi       | 3            | 322572.     | XXXXXX                    |
| Con-BaishChi      | 3            | 345255.     | XXXXXX                    |
| La-OgenBul        | 3            | 354087.     | XXXXXX                    |
| Ag-15591Gha       | 3            | 388478.     | XXXXXX                    |
| La-KroFran        | 4            | 396646.     | XXXXXX                    |
| Mom-KhaInd        | 3            | 447844.     | XXXXXX                    |
| Am-KizilUzbe      | 3            | 454926.     | XXXXXX                    |
| In-ComunSp        | 2            | 471780.     | XXXXXX                    |

|               |   |           |         |
|---------------|---|-----------|---------|
| Can-DulUSA    | 3 | 512468.   | XXXXXXX |
| Can-EfJa      | 3 | 515591.   | XXXXXXX |
| Can-EanaHun   | 3 | 586081.   | XXXXXXX |
| Am-KafEgy     | 2 | 596690.   | XXXXXXX |
| Can-Ogen2Is   | 3 | 596991.   | XXXXXXX |
| Can-PGRFran   | 3 | 606737.   | XXXXXXX |
| Can-WiUSA     | 3 | 623164.   | XXXXXXX |
| Dud-QAPMGeorg | 3 | 632558.   | XXXXXXX |
| In-TeSp       | 3 | 770164.   | X XXXXX |
| Am-YokIs      | 2 | 793070.   | XXXXXXX |
| Can-VedFran   | 3 | 875521.   | XXXXXX  |
| Can-TopUSA    | 3 | 881683.   | XXXXX   |
| Mom-MR1Ind    | 3 | 952605.   | XXX     |
| Am-AnaFran    | 3 | 980450.   | XX      |
| Can-GCHUSA    | 3 | 1.38612E6 | XX      |
| La-CascaPor   | 2 | 1.77433E6 | XX      |
| Can-SucrFran  | 3 | 1.98586E6 | XX      |
| Can-NOFran    | 2 | 2.15003E6 | XXX     |
| La-ZatIta     | 3 | 2.37188E6 | XX      |
| Can-GyFran    | 2 | 2.76698E6 | X       |

#### LSD analysis for EE.1 per accessions

Method: 95.0 percentage LSD

| <i>accessions</i> | <i>Cases</i> | <i>Mean</i> | <i>Homogeneous groups</i> |
|-------------------|--------------|-------------|---------------------------|
| In-PsPiñSp        | 3            | 750.0       | X                         |
| Tibish-Ksud       | 3            | 750.0       | X                         |
| In-CGBUSA         | 3            | 914.0       | X                         |
| Ag-WChInd         | 3            | 970.667     | X                         |
| Ac-SVIIInd        | 2            | 1440.0      | X                         |
| Ac-TGR1551Zimb    | 3            | 1731.0      | X                         |
| Flex-Co20Ind      | 3            | 1884.0      | X                         |
| Ac-SRKSLan        | 3            | 2040.33     | X                         |
| Con-FreeCJa       | 3            | 2316.0      | X                         |
| Ag-TendSud        | 3            | 2491.0      | X                         |
| Chi-VellInd       | 3            | 3673.33     | X                         |
| In-CrabPor        | 2            | 5025.5      | XX                        |
| In-AmAoroSp       | 2            | 6279.0      | XX                        |
| chate-Carlta      | 1            | 7996.0      | XXX                       |
| In-HoneyDewUSA    | 3            | 9163.0      | X                         |
| In-BBescrSp       | 3            | 11799.0     | X                         |
| In-TDewUSA        | 3            | 13039.0     | X                         |
| Ag-CallInd        | 3            | 13805.3     | X                         |
| In-BBredSp        | 3            | 15013.0     | X                         |
| In-TeNinvSp       | 2            | 19638.0     | XX                        |
| In-RoMoch1Sp      | 3            | 23562.7     | X                         |
| Con-ShiroJa       | 3            | 36891.0     | X                         |
| Flex-AryaInd      | 3            | 42910.0     | X                         |
| Can-SemUSA        | 2            | 47230.0     | XX                        |
| Flex-SnakeSA      | 3            | 53337.7     | X                         |
| In-TeNinvSp2      | 2            | 53360.0     | XX                        |
| Am-TokTaj         | 3            | 101820.     | X                         |
| Con-NanChi        | 3            | 110381.     | X                         |
| Con-PauPol        | 3            | 113415.     | X                         |
| Con-GMJJa         | 3            | 128293.     | X                         |
| Ag-15591Gha       | 3            | 130380.     | X                         |
| Can-NCFran        | 2            | 162413.     | XXX                       |

|               |   |           |        |
|---------------|---|-----------|--------|
| In-LaBolasSp  | 3 | 203377.   | XX     |
| Dud-QPMAfg    | 3 | 204094.   | XX     |
| Can-HBJUSA    | 3 | 208441.   | XX     |
| Mom-PII24Ind  | 3 | 232262.   | XXX    |
| Am-HassanTur  | 3 | 253882.   | XXX    |
| Con-SCKo      | 3 | 263757.   | XXX    |
| Ac-G22843Se   | 3 | 272748.   | XXX    |
| Can-EanaHun   | 3 | 307686.   | XXX    |
| La-ErizoSp    | 3 | 333400.   | XXX    |
| Am-korcaRus   | 3 | 363514.   | XXX    |
| La-KroFran    | 4 | 368981.   | XXX    |
| Am-KizilUzbe  | 3 | 391130.   | XXX    |
| Can-PGRFran   | 3 | 424693.   | XXX    |
| Mom-KhaInd    | 3 | 429122.   | XXX    |
| Con-BaishChi  | 3 | 458243.   | XXX    |
| Am-NesviGeor  | 3 | 472228.   | XXX    |
| Con-MielChi   | 3 | 498788.   | XXX    |
| In-LaEscrSp   | 2 | 616583.   | XXXXX  |
| Dud-QAPMGeorg | 3 | 634681.   | XXXX   |
| In-AmCañSp    | 3 | 762547.   | XXXXX  |
| La-OgenBul    | 3 | 853642.   | XXXXX  |
| Can-GCHUSA    | 3 | 894841.   | XXXXX  |
| Can-WIUSA     | 3 | 952777.   | XXXXX  |
| Am-KafEgy     | 2 | 1.04213E6 | XXXXXX |
| Mom-MRIInd    | 3 | 1.18726E6 | XXXXXX |
| Am-AnaFran    | 3 | 1.21103E6 | XXXXXX |
| Can-PearlJa   | 3 | 1.37385E6 | XXXXX  |
| In-ComunSp    | 2 | 1.58971E6 | XXXXX  |
| Can-DulUSA    | 3 | 1.75573E6 | XXXX   |
| Can-EfJa      | 3 | 1.81182E6 | XXXX   |
| In-TeSp       | 3 | 1.90041E6 | XXX    |
| Can-TopUSA    | 3 | 2.19501E6 | XX     |
| Can-Ogen2Is   | 3 | 2.20671E6 | XX     |
| Am-YokIs      | 2 | 2.47488E6 | XXX    |
| Can-VedFran   | 3 | 2.77404E6 | XXX    |
| Can-NOFran    | 2 | 2.86253E6 | XXX    |
| Can-SucrFran  | 3 | 3.80108E6 | XXX    |
| La-ZatlIta    | 3 | 3.92417E6 | XX     |
| Can-GyFran    | 2 | 4.00553E6 | XX     |
| La-CascaPor   | 2 | 4.6905E6  | X      |

#### LSD analysis for EE.5 per accessions

Method: 95.0 percentage LSD

| <i>accessions</i> | <i>Cases</i> | <i>Mean</i> | <i>Homogeneous groups</i> |
|-------------------|--------------|-------------|---------------------------|
| Ac-TGR1551Zimb    | 3            | 750.0       | XX                        |
| Chi-VellInd       | 3            | 750.0       | XX                        |
| chate-CarIta      | 1            | 750.0       | XXXXXX                    |
| In-TDewUSA        | 3            | 750.0       | XX                        |
| Tibish-Ksud       | 3            | 750.0       | XX                        |
| In-AmAoroSp       | 2            | 750.0       | XXXX                      |
| In-CGBUSA         | 3            | 750.0       | XX                        |
| In-TeNinvSp       | 2            | 750.0       | XXXX                      |
| In-PsPiñSp        | 3            | 750.0       | XX                        |
| Ac-SVIIInd        | 2            | 750.0       | XXXX                      |
| In-CrabPor        | 2            | 750.0       | XXXX                      |
| Ac-SRKSLan        | 3            | 750.0       | XX                        |



|                |   |         |          |
|----------------|---|---------|----------|
| In-RoMoch1Sp   | 3 | 750.0   | XX       |
| In-HoneyDewUSA | 3 | 750.0   | XX       |
| In-BBredSp     | 3 | 750.0   | XX       |
| Con-FreeCJa    | 3 | 750.0   | XX       |
| In-BBescrSp    | 3 | 750.0   | XX       |
| Ag-TendSud     | 3 | 750.0   | XX       |
| Ag-WChInd      | 3 | 750.0   | XX       |
| Flex-Co20Ind   | 3 | 750.0   | XX       |
| Flex-AryaInd   | 3 | 1340.0  | XX       |
| In-TeNinvSp2   | 2 | 2347.0  | XXXX     |
| La-KroFran     | 4 | 2537.0  | X        |
| Mom-PII24Ind   | 3 | 3119.33 | XXX      |
| Ag-CallInd     | 3 | 3207.67 | XXX      |
| Con-ShiroJa    | 3 | 3427.67 | XXX      |
| Can-SemUSA     | 2 | 3822.0  | XXXX     |
| Am-korcaRus    | 3 | 4016.67 | XXX      |
| Am-TokTaj      | 3 | 4361.33 | XXX      |
| Can-PGRFran    | 3 | 4380.33 | XXX      |
| In-LaBolasSp   | 3 | 4560.0  | XXX      |
| Can-NCFran     | 2 | 5312.0  | XXXXXX   |
| Ag-15591Gha    | 3 | 5852.33 | XXXX     |
| Flex-SnakeSA   | 3 | 5905.0  | XXXX     |
| Can-HBJUSA     | 3 | 5924.33 | XXXX     |
| Con-GMJJa      | 3 | 7097.0  | XXXX     |
| Can-GCHUSA     | 3 | 7508.33 | XXXX     |
| Am-KizilUzbe   | 3 | 7764.67 | XXXX     |
| Mom-MR1Ind     | 3 | 9658.67 | XXXXXX   |
| Ac-G22843Se    | 3 | 10347.0 | XXXXXX   |
| Am-HassanTur   | 3 | 10374.7 | XXXXXX   |
| Am-NesviGeor   | 3 | 10978.0 | XXXXXX   |
| La-ErizoSp     | 3 | 11897.7 | XXXXXX   |
| Can-WiUSA      | 3 | 13036.7 | XXXXXX   |
| Dud-QAPMGeorg  | 3 | 14614.3 | XXXXXX   |
| Can-PearlJa    | 3 | 15981.0 | XXXXXX   |
| Am-YokIs       | 2 | 16055.5 | XXXXXX   |
| Mom-KhaInd     | 3 | 16131.3 | XXXXXX   |
| Con-NanChi     | 3 | 18867.3 | XXXXXX   |
| Can-EanaHun    | 3 | 20677.3 | XXXXXX   |
| La-OgenBul     | 3 | 21458.7 | XXXXXX   |
| Can-VedFran    | 3 | 24057.3 | XXXXXX   |
| In-ComunSp     | 2 | 26830.5 | XXXXXXXX |
| Can-DulUSA     | 3 | 27193.7 | XXXXXX   |
| In-TeSp        | 3 | 29157.3 | XXXXXX   |
| Con-BaishChi   | 3 | 30958.3 | XXXXXXXX |
| Can-NOFran     | 2 | 32843.0 | XXXXXXXX |
| Can-GyFran     | 2 | 33056.5 | XXXXXXXX |
| In-AmCañSp     | 3 | 37735.3 | XXXXXXXX |
| Con-SCKo       | 3 | 40087.3 | XXXXXXXX |
| Con-MielChi    | 3 | 42618.0 | XXXXXXXX |
| Am-KafEgy      | 2 | 43908.5 | XXXXXXXX |
| Can-EfJa       | 3 | 44030.3 | XXXXXX   |
| Can-TopUSA     | 3 | 47183.0 | XXXXXX   |
| Dud-QPMAfg     | 3 | 47729.0 | XXXXXX   |
| Am-AnaFran     | 3 | 51834.0 | XXXXX    |
| Con-PauPol     | 3 | 56326.3 | XXXXX    |
| La-CascaPor    | 2 | 76522.5 | XXXXX    |
| In-LaEscrSp    | 2 | 82706.0 | XXXX     |

|              |   |         |     |
|--------------|---|---------|-----|
| Can-Ogen2Is  | 3 | 88777.3 | XXX |
| Can-SucrFran | 3 | 96710.3 | XX  |
| La-Zatlta    | 3 | 99799.0 | X   |

#### LSD analysis for EE.8 per accessions

Method: 95.0 percentage LSD

| <i>accessions</i> | <i>Cases</i> | <i>Mean</i> | <i>Homogeneous groups</i> |
|-------------------|--------------|-------------|---------------------------|
| Ag-WChInd         | 3            | 750.0       | X                         |
| In-CGBUSA         | 3            | 750.0       | X                         |
| In-TeNinvSp2      | 2            | 750.0       | X                         |
| Ac-SVInd          | 2            | 750.0       | X                         |
| Con-FreeCJa       | 3            | 750.0       | X                         |
| In-PsPiñSp        | 3            | 750.0       | X                         |
| Tibish-Ksud       | 3            | 750.0       | X                         |
| In-CrabPor        | 2            | 750.0       | X                         |
| In-HoneyDewUSA    | 3            | 750.0       | X                         |
| Ac-TGR1551Zimb    | 3            | 750.0       | X                         |
| Ac-SRKSLan        | 3            | 750.0       | X                         |
| Flex-Co20Ind      | 3            | 750.0       | X                         |
| Con-ShiroJa       | 3            | 1185.33     | X                         |
| In-BBredSp        | 3            | 1425.67     | X                         |
| Chi-VellInd       | 3            | 1741.0      | X                         |
| In-AmCañSp        | 3            | 1981.67     | X                         |
| In-RoMoch1Sp      | 3            | 2066.0      | X                         |
| In-BBscrSp        | 3            | 2272.33     | X                         |
| Ag-TendSud        | 3            | 2635.67     | X                         |
| Can-SemUSA        | 2            | 3582.0      | X                         |
| Ag-CallInd        | 3            | 3624.0      | X                         |
| In-TDewUSA        | 3            | 4477.33     | X                         |
| In-AmAoroSp       | 2            | 5956.0      | X                         |
| chate-Carlta      | 1            | 11520.0     | XX                        |
| Flex-AryaInd      | 3            | 12908.0     | X                         |
| La-ErizoSp        | 3            | 14358.7     | X                         |
| Can-HBJUSA        | 3            | 15440.0     | X                         |
| Con-SCKo          | 3            | 23013.3     | X                         |
| Am-TokTaj         | 3            | 24437.7     | X                         |
| Con-NanChi        | 3            | 33455.3     | X                         |
| Am-HassanTur      | 3            | 35143.0     | X                         |
| Ac-G22843Se       | 3            | 35242.7     | X                         |
| Mom-PII24Ind      | 3            | 36736.3     | X                         |
| In-TeNinvSp       | 2            | 36761.5     | XX                        |
| Am-korcaRus       | 3            | 46092.3     | X                         |
| Con-GMJJa         | 3            | 46296.0     | X                         |
| Con-BaishChi      | 3            | 88343.3     | X                         |
| Can-PearlJa       | 3            | 89465.3     | X                         |
| In-LaBolasSp      | 3            | 102393.     | X                         |
| Flex-SnakeSA      | 3            | 118431.     | X                         |
| Dud-QPMAfg        | 3            | 124163.     | X                         |
| In-LaEscrSp       | 2            | 130336.     | XX                        |
| Am-NesviGeor      | 3            | 138043.     | X                         |
| Con-PauPol        | 3            | 155318.     | X                         |
| Ag-15591Gha       | 3            | 210679.     | XX                        |
| In-ComunSp        | 2            | 224281.     | XX                        |
| La-OgenBul        | 3            | 239491.     | XX                        |
| Can-EfJa          | 3            | 244529.     | XX                        |
| Can-Ogen2Is       | 3            | 280879.     | XX                        |

|               |   |           |      |
|---------------|---|-----------|------|
| Mom-KhaInd    | 3 | 282557.   | XX   |
| Con-MielChi   | 3 | 292693.   | XX   |
| Am-KizilUzbe  | 3 | 298188.   | XX   |
| Am-KafEgy     | 2 | 348618.   | XX   |
| Can-NCFran    | 2 | 409586.   | XX   |
| Can-WiUSA     | 3 | 412495.   | XX   |
| In-TeSp       | 3 | 412838.   | XX   |
| Can-EanaHun   | 3 | 435781.   | XX   |
| La-KroFran    | 4 | 473658.   | XX   |
| Can-PGRFran   | 3 | 498495.   | XX   |
| Dud-QAPMGeorg | 3 | 519031.   | XX   |
| Am-YokIs      | 2 | 537119.   | XX   |
| Can-DulUSA    | 3 | 618634.   | XX   |
| Can-VedFran   | 3 | 698845.   | XX   |
| La-CascaPor   | 2 | 768629.   | XXXX |
| Can-TopUSA    | 3 | 791317.   | XXX  |
| Mom-MR1Ind    | 3 | 1.45921E6 | XXX  |
| Can-SucrFran  | 3 | 2.07807E6 | XX   |
| Am-AnaFran    | 3 | 2.19031E6 | X    |
| La-ZatIta     | 3 | 3.60783E6 | X    |
| Can-NOFran    | 2 | 3.64301E6 | X    |
| Can-GyFran    | 2 | 3.71252E6 | X    |
| Can-GCHUSA    | 3 | 4.22125E6 | X    |

#### LSD analysis for EE.4 per accessions

Method: 95.0 percentage LSD

| <i>accessions</i> | <i>Cases</i> | <i>Mean</i> | <i>Homogeneous groups</i> |
|-------------------|--------------|-------------|---------------------------|
| Can-SemUSA        | 2            | 750.0       | X                         |
| In-RoMoch1Sp      | 3            | 750.0       | X                         |
| In-PsPiñSp        | 3            | 754.0       | X                         |
| Con-ShiroJa       | 3            | 769.0       | X                         |
| Ac-TGR1551Zimb    | 3            | 849.667     | X                         |
| Tibish-Ksud       | 3            | 850.667     | X                         |
| In-CGBUSA         | 3            | 857.333     | X                         |
| Can-PearlJa       | 3            | 858.0       | X                         |
| La-ErizoSp        | 3            | 859.0       | X                         |
| Con-GMJJa         | 3            | 862.333     | X                         |
| In-TeSp           | 3            | 862.667     | X                         |
| Ac-SRKSLan        | 3            | 864.333     | X                         |
| In-BBescrSp       | 3            | 866.0       | X                         |
| Con-SCKo          | 3            | 877.333     | X                         |
| Con-MielChi       | 3            | 877.667     | X                         |
| In-HoneyDewUSA    | 3            | 881.0       | X                         |
| In-TeNinvSp2      | 2            | 888.5       | X                         |
| In-CrabPor        | 2            | 915.0       | X                         |
| In-AmAoroSp       | 2            | 917.5       | X                         |
| Can-HBJUSA        | 3            | 924.0       | X                         |
| Ac-SVIIInd        | 2            | 927.0       | X                         |
| In-BBredSp        | 3            | 943.667     | X                         |
| Am-HassanTur      | 3            | 946.0       | X                         |
| In-ComunSp        | 2            | 951.5       | X                         |
| Flex-AryaInd      | 3            | 986.667     | X                         |
| Chi-VellInd       | 3            | 991.0       | X                         |
| Con-NanChi        | 3            | 1002.67     | X                         |
| Ac-G22843Se       | 3            | 1051.67     | X                         |
| In-AmCañSp        | 3            | 1072.33     | X                         |

|               |   |         |    |
|---------------|---|---------|----|
| Con-FreeCJa   | 3 | 1087.67 | X  |
| Flex-Co20Ind  | 3 | 1129.0  | X  |
| Ag-WChInd     | 3 | 1132.67 | X  |
| Ag-TendSud    | 3 | 1134.67 | X  |
| Con-PauPol    | 3 | 1171.0  | X  |
| chate-CarIta  | 1 | 1172.0  | XX |
| In-TeNinvSp   | 2 | 1177.0  | X  |
| In-LaBolasSp  | 3 | 1199.33 | X  |
| In-TDewUSA    | 3 | 1264.33 | X  |
| Ag-15591Gha   | 3 | 1352.33 | X  |
| Ag-CallInd    | 3 | 1594.33 | X  |
| Am-TokTaj     | 3 | 3155.0  | X  |
| Am-korcaRus   | 3 | 4114.0  | X  |
| Flex-SnakeSA  | 3 | 4208.33 | X  |
| Mom-PII24Ind  | 3 | 4982.67 | X  |
| Dud-QPMAfg    | 3 | 5914.0  | X  |
| Con-BaishChi  | 3 | 6518.33 | X  |
| La-KroFran    | 4 | 8571.0  | X  |
| Am-NesviGeor  | 3 | 16293.0 | X  |
| In-LaEscrSp   | 2 | 16589.0 | X  |
| Can-EfJa      | 3 | 25570.3 | X  |
| Am-KafEgy     | 2 | 36734.5 | X  |
| Can-DulUSA    | 3 | 37007.7 | X  |
| La-OgenBul    | 3 | 37429.7 | X  |
| Can-SucrFran  | 3 | 38092.0 | X  |
| Can-EanaHun   | 3 | 38926.3 | X  |
| Dud-QAPMGeorg | 3 | 43209.0 | X  |
| Can-NCFran    | 2 | 49214.0 | XX |
| Am-YokIs      | 2 | 70089.0 | XX |
| Can-WiUSA     | 3 | 76117.7 | XX |
| Can-NOFran    | 2 | 103122. | XX |
| Can-VedFran   | 3 | 105088. | XX |
| Can-PGRFran   | 3 | 105423. | XX |
| Mom-KhaInd    | 3 | 131758. | XX |
| Can-Ogen2Is   | 3 | 135199. | XX |
| La-CascaPor   | 2 | 136496. | XX |
| Can-GyFran    | 2 | 149721. | XX |
| Am-KizilUzbe  | 3 | 168627. | XX |
| Can-TopUSA    | 3 | 172939. | XX |
| La-ZatIta     | 3 | 273537. | XX |
| Mom-MR1Ind    | 3 | 396178. | XX |
| Am-AnaFran    | 3 | 525013. | X  |
| Can-GCHUSA    | 3 | 933784. | X  |

#### LSD analysis for EE.6 per accessions

Method: 95.0 percentage LSD

| <i>accessions</i> | <i>Cases</i> | <i>Mean</i> | <i>Homogeneous groups</i> |
|-------------------|--------------|-------------|---------------------------|
| Dud-QAPMGeorg     | 3            | 750.0       | X                         |
| Dud-QPMAfg        | 3            | 750.0       | X                         |
| Can-DulUSA        | 3            | 750.0       | X                         |
| In-AmCañSp        | 3            | 750.0       | X                         |
| Can-HBJUSA        | 3            | 750.0       | X                         |
| In-CGBUSA         | 3            | 750.0       | X                         |
| In-AmAoroSp       | 2            | 750.0       | X                         |
| In-ComunSp        | 2            | 750.0       | X                         |
| In-BBescrSp       | 3            | 750.0       | X                         |

|                |   |         |     |
|----------------|---|---------|-----|
| In-CrabPor     | 2 | 750.0   | X   |
| Can-SemUSA     | 2 | 750.0   | X   |
| Flex-Co20Ind   | 3 | 750.0   | X   |
| In-TDewUSA     | 3 | 750.0   | X   |
| Am-YokIs       | 2 | 750.0   | X   |
| In-HoneyDewUSA | 3 | 750.0   | X   |
| In-BBredSp     | 3 | 750.0   | X   |
| Am-korcaRus    | 3 | 750.0   | X   |
| La-CascaPor    | 2 | 750.0   | X   |
| Ac-SRKSLan     | 3 | 750.0   | X   |
| Can-GyFran     | 2 | 750.0   | X   |
| Ac-TGR1551Zimb | 3 | 750.0   | X   |
| La-KroFran     | 4 | 750.0   | X   |
| In-TeNinvSp2   | 2 | 750.0   | X   |
| In-RoMoch1Sp   | 3 | 750.0   | X   |
| Can-PGRFran    | 3 | 750.0   | X   |
| Ac-SVIIInd     | 2 | 750.0   | X   |
| Mom-PII24Ind   | 3 | 750.0   | X   |
| Am-TokTaj      | 3 | 750.0   | X   |
| Chi-VellInd    | 3 | 750.0   | X   |
| La-ErizoSp     | 3 | 750.0   | X   |
| In-PsPiñSp     | 3 | 750.0   | X   |
| In-LaBolasSp   | 3 | 750.0   | X   |
| Ag-WChInd      | 3 | 750.0   | X   |
| Con-FreeCJa    | 3 | 750.0   | X   |
| Con-BaishChi   | 3 | 750.0   | X   |
| Con-MielChi    | 3 | 750.0   | X   |
| Con-NanChi     | 3 | 750.0   | X   |
| Con-PauPol     | 3 | 750.0   | X   |
| Con-SCKo       | 3 | 750.0   | X   |
| Con-ShiroJa    | 3 | 750.0   | X   |
| Tibish-Ksud    | 3 | 1392.67 | X   |
| Am-NesviGeor   | 3 | 1449.0  | X   |
| Can-Ogen2Is    | 3 | 1460.67 | X   |
| In-LaEscrSp    | 2 | 1471.5  | X   |
| La-OgenBul     | 3 | 1631.0  | X   |
| Am-HassanTur   | 3 | 1641.0  | X   |
| Can-NCFran     | 2 | 1697.0  | XX  |
| Can-EfJa       | 3 | 1703.0  | X   |
| Can-WiUSA      | 3 | 1704.33 | X   |
| Ag-CallInd     | 3 | 1834.0  | X   |
| Ac-G22843Se    | 3 | 1903.67 | X   |
| La-ZatlIta     | 3 | 2105.67 | X   |
| Mom-MR1Ind     | 3 | 2115.67 | X   |
| Con-GMJJa      | 3 | 2487.67 | X   |
| Can-NOFran     | 2 | 2497.0  | XX  |
| Am-AnaFran     | 3 | 2544.67 | X   |
| Can-TopUSA     | 3 | 3846.33 | XX  |
| Can-VedFran    | 3 | 3977.67 | XX  |
| Can-PearlJa    | 3 | 4436.0  | XX  |
| In-TeSp        | 3 | 4576.67 | XX  |
| In-TeNinvSp    | 2 | 5152.5  | XX  |
| Flex-AryaInd   | 3 | 5584.33 | XX  |
| Ag-TendSud     | 3 | 5759.33 | XX  |
| chate-CarlIta  | 1 | 7135.0  | XXX |
| Mom-KhaInd     | 3 | 8707.67 | XX  |
| Can-SucrFran   | 3 | 10795.7 | XXX |

|              |   |         |     |
|--------------|---|---------|-----|
| Am-KafEgy    | 2 | 13468.5 | XXX |
| Can-EanaHun  | 3 | 18252.0 | XXX |
| Am-KizilUzbe | 3 | 24176.0 | XX  |
| Flex-SnakeSA | 3 | 25308.0 | XX  |
| Can-GCHUSA   | 3 | 30663.0 | X   |
| Ag-15591Gha  | 3 | 144853. | X   |

### LSD analysis for EE.3 per accessions

Method: 95.0 percentage LSD

| <i>accessions</i> | <i>Cases</i> | <i>Mean</i> | <i>Homogeneous groups</i> |
|-------------------|--------------|-------------|---------------------------|
| Ac-TGR1551Zimb    | 3            | 750.0       | X                         |
| In-AmAoroSp       | 2            | 750.0       | X                         |
| Tibish-Ksud       | 3            | 750.0       | X                         |
| In-RoMoch1Sp      | 3            | 750.0       | X                         |
| Ac-SVIIInd        | 2            | 750.0       | X                         |
| Ac-SRKSLan        | 3            | 750.0       | X                         |
| Am-korcaRus       | 3            | 753.333     | X                         |
| In-HoneyDewUSA    | 3            | 805.667     | X                         |
| Am-TokTaj         | 3            | 832.0       | X                         |
| In-AmCañSp        | 3            | 867.0       | X                         |
| Can-NCFran        | 2            | 888.0       | X                         |
| In-BBredSp        | 3            | 917.667     | X                         |
| In-CrabPor        | 2            | 938.0       | X                         |
| Con-FreeCJa       | 3            | 939.0       | X                         |
| Chi-VellInd       | 3            | 974.333     | X                         |
| Can-GCHUSA        | 3            | 1062.33     | X                         |
| Flex-Co20Ind      | 3            | 1065.67     | X                         |
| chate-CarIta      | 1            | 1259.0      | XXX                       |
| Ag-15591Gha       | 3            | 2128.0      | X                         |
| Flex-AryaInd      | 3            | 4324.67     | X                         |
| Ag-CallInd        | 3            | 4969.67     | X                         |
| In-TDewUSA        | 3            | 5377.33     | X                         |
| Con-BaishChi      | 3            | 5685.33     | X                         |
| Can-HBJUSA        | 3            | 6862.0      | X                         |
| Mom-PII24Ind      | 3            | 6958.67     | X                         |
| In-TeNinvSp2      | 2            | 7019.0      | X                         |
| Con-ShiroJa       | 3            | 7331.67     | X                         |
| Can-SemUSA        | 2            | 7441.5      | X                         |
| Con-GMJJa         | 3            | 8395.33     | X                         |
| In-PsPiñSp        | 3            | 8598.0      | X                         |
| Ag-TendSud        | 3            | 8681.0      | X                         |
| La-KroFran        | 4            | 8725.5      | X                         |
| In-TeNinvSp       | 2            | 10403.0     | X                         |
| Dud-QPMAfg        | 3            | 10735.3     | X                         |
| In-BBescrSp       | 3            | 14466.7     | X                         |
| Can-EfJa          | 3            | 15118.7     | X                         |
| Con-PauPol        | 3            | 16342.3     | X                         |
| Can-EanaHun       | 3            | 16723.7     | X                         |
| Con-NanChi        | 3            | 18381.7     | X                         |
| Can-DulUSA        | 3            | 19281.3     | X                         |
| Can-TopUSA        | 3            | 19480.0     | X                         |
| Am-HassanTur      | 3            | 19900.7     | X                         |
| In-LaEscrSp       | 2            | 20707.0     | XXX                       |
| La-ErizoSp        | 3            | 22836.3     | X                         |
| In-CGBUSA         | 3            | 23096.3     | X                         |
| Am-AnaFran        | 3            | 23443.3     | X                         |

|               |   |         |        |
|---------------|---|---------|--------|
| Flex-SnakeSA  | 3 | 23894.0 | X      |
| Ag-WChInd     | 3 | 26358.3 | X      |
| Can-PGRFran   | 3 | 28178.7 | XX     |
| Ac-G22843Se   | 3 | 28775.3 | XX     |
| Con-SCKo      | 3 | 30005.7 | XXX    |
| Can-PearlJa   | 3 | 30083.3 | XXX    |
| Con-MielChi   | 3 | 30849.0 | XXX    |
| Can-Ogen2Is   | 3 | 34589.7 | XXX    |
| Am-KizilUzbe  | 3 | 39133.3 | XXX    |
| Dud-QAPMGeorg | 3 | 39641.3 | XXX    |
| Am-NesviGeor  | 3 | 39935.3 | XXXX   |
| Am-KafEgy     | 2 | 41449.0 | XXXX   |
| La-OgenBul    | 3 | 44337.0 | XXXX   |
| In-LaBolasSp  | 3 | 47724.0 | XXXX   |
| Mom-MR1Ind    | 3 | 49507.3 | XXXX   |
| La-CascaPor   | 2 | 64118.0 | XXXXXX |
| In-TeSp       | 3 | 74430.3 | XXXXXX |
| Mom-KhaInd    | 3 | 101971. | XXXXXX |
| Can-VedFran   | 3 | 104385. | XXXXXX |
| Am-YokIs      | 2 | 123743. | XXXX   |
| Can-WiUSA     | 3 | 132012. | XXX    |
| In-ComunSp    | 2 | 148188. | XXX    |
| Can-SucrFran  | 3 | 158825. | XX     |
| Can-NOFran    | 2 | 161947. | XX     |
| Can-GyFran    | 2 | 187492. | XX     |
| La-ZatIta     | 3 | 257628. | X      |

#### LSD analysis for EE.9 per accessions

Method: 95.0 percentage LSD

| <i>accessions</i> | <i>Cases</i> | <i>Mean</i> | <i>Homogeneous groups</i> |
|-------------------|--------------|-------------|---------------------------|
| Ag-WChInd         | 3            | 750.0       | X                         |
| Con-SCKo          | 3            | 750.0       | X                         |
| Con-GMJJa         | 3            | 750.0       | X                         |
| In-TeNinvSp       | 2            | 750.0       | XX                        |
| Con-NanChi        | 3            | 750.0       | X                         |
| Con-FreeCJa       | 3            | 750.0       | X                         |
| In-TDewUSA        | 3            | 750.0       | X                         |
| Con-ShiroJa       | 3            | 750.0       | X                         |
| In-BBescrSp       | 3            | 750.0       | X                         |
| In-TeNinvSp2      | 2            | 750.0       | XX                        |
| In-PsPiñSp        | 3            | 750.0       | X                         |
| Am-HassanTur      | 3            | 750.0       | X                         |
| Flex-Co20Ind      | 3            | 750.0       | X                         |
| Ac-TGR1551Zimb    | 3            | 750.0       | X                         |
| In-CrabPor        | 2            | 750.0       | XX                        |
| In-AmCañSp        | 3            | 750.0       | X                         |
| Tibish-Ksud       | 3            | 750.0       | X                         |
| In-HoneyDewUSA    | 3            | 750.0       | X                         |
| Ac-SRKSLan        | 3            | 750.0       | X                         |
| La-ErizoSp        | 3            | 750.0       | X                         |
| In-AmAoroSp       | 2            | 750.0       | XX                        |
| In-RoMoch1Sp      | 3            | 750.0       | X                         |
| Can-SemUSA        | 2            | 750.0       | XX                        |
| Ac-SVIIInd        | 2            | 750.0       | XX                        |
| Chi-VellInd       | 3            | 750.0       | X                         |
| In-BBredSp        | 3            | 750.0       | X                         |

|               |   |         |      |
|---------------|---|---------|------|
| Ag-TendSud    | 3 | 750.0   | X    |
| In-CGBUSA     | 3 | 750.0   | X    |
| Con-BaishChi  | 3 | 1403.67 | X    |
| Can-HBJUSA    | 3 | 1579.0  | X    |
| Mom-PII24Ind  | 3 | 1591.67 | X    |
| Am-korcaRus   | 3 | 2035.0  | X    |
| Ac-G22843Se   | 3 | 2159.0  | X    |
| Am-TokTaj     | 3 | 2200.33 | X    |
| Flex-AryaInd  | 3 | 2371.67 | X    |
| In-ComunSp    | 2 | 2513.5  | XX   |
| Ag-CallInd    | 3 | 2738.0  | X    |
| chate-CarIta  | 1 | 2775.0  | XXX  |
| Con-MielChi   | 3 | 2873.33 | X    |
| Can-EfJa      | 3 | 3206.67 | X    |
| Can-PearlJa   | 3 | 3485.33 | X    |
| Dud-QPMAfg    | 3 | 4435.0  | X    |
| In-LaEscrSp   | 2 | 5244.5  | XX   |
| Am-NesviGeor  | 3 | 6553.67 | X    |
| In-LaBolasSp  | 3 | 6590.67 | X    |
| Con-PauPol    | 3 | 7922.33 | XX   |
| Am-YokIs      | 2 | 9032.0  | XX   |
| Can-WiUSA     | 3 | 9262.0  | XX   |
| In-TeSp       | 3 | 10798.7 | XX   |
| Can-Ogen2Is   | 3 | 10828.0 | XX   |
| La-OgenBul    | 3 | 12858.0 | XX   |
| Am-KafEgy     | 2 | 13337.5 | XX   |
| Can-TopUSA    | 3 | 14420.3 | XX   |
| Can-PGRFran   | 3 | 17328.3 | XX   |
| Can-VedFran   | 3 | 17688.3 | XX   |
| Flex-SnakeSA  | 3 | 18637.0 | XX   |
| Can-DulUSA    | 3 | 19347.0 | XX   |
| Can-EanaHun   | 3 | 20235.3 | XX   |
| La-KroFran    | 4 | 22142.8 | XX   |
| Dud-QAPMGeorg | 3 | 23508.3 | XX   |
| Am-KizilUzbe  | 3 | 24137.0 | XX   |
| Can-NCFran    | 2 | 29312.0 | XXX  |
| Mom-KhaInd    | 3 | 48682.7 | XXX  |
| La-CascaPor   | 2 | 53602.0 | XXXX |
| Ag-15591Gha   | 3 | 114482. | XXXX |
| La-ZatIta     | 3 | 125786. | XXXX |
| Can-SucrFran  | 3 | 157445. | XXXX |
| Can-NOFran    | 2 | 168317. | XXXX |
| Can-GCHUSA    | 3 | 180323. | XXX  |
| Mom-MRIInd    | 3 | 235380. | XX   |
| Am-AnaFran    | 3 | 243494. | XX   |
| Can-GyFran    | 2 | 281391. | X    |

#### LSD analysis for ME.2 per accessions

Method: 95.0 percentage LSD

| <i>accessions</i> | <i>Cases</i> | <i>Mean</i> | <i>Homogeneous groups</i> |
|-------------------|--------------|-------------|---------------------------|
| La-CascaPor       | 2            | 750.0       | X                         |
| Can-DulUSA        | 3            | 750.0       | X                         |
| Can-SemUSA        | 2            | 750.0       | X                         |
| Am-AnaFran        | 3            | 773.667     | X                         |
| Am-YokIs          | 2            | 911.0       | X                         |
| Mom-PII24Ind      | 3            | 948.0       | X                         |



|                |   |         |   |
|----------------|---|---------|---|
| Can-VedFran    | 3 | 1419.33 | X |
| Can-TopUSA     | 3 | 2360.67 | X |
| Am-KizilUzbe   | 3 | 2569.67 | X |
| Con-GMJJa      | 3 | 2584.0  | X |
| In-LaEscrSp    | 2 | 2915.5  | X |
| In-TeNinvSp2   | 2 | 3077.0  | X |
| Am-korcaRus    | 3 | 3713.0  | X |
| In-ComunSp     | 2 | 3997.0  | X |
| Can-GyFran     | 2 | 4009.0  | X |
| Con-MielChi    | 3 | 4736.33 | X |
| Con-BaishChi   | 3 | 5760.0  | X |
| Chi-VellInd    | 3 | 5805.67 | X |
| La-OgenBul     | 3 | 5885.33 | X |
| Am-TokTaj      | 3 | 5888.67 | X |
| La-ErizoSp     | 3 | 6938.0  | X |
| In-BBescrSp    | 3 | 7417.0  | X |
| Can-EfJa       | 3 | 7444.0  | X |
| Can-NOFran     | 2 | 8393.0  | X |
| Can-GCHUSA     | 3 | 8415.0  | X |
| Can-PGRFran    | 3 | 8700.0  | X |
| Am-KafEgy      | 2 | 9100.0  | X |
| Can-WiUSA      | 3 | 9152.33 | X |
| In-LaBolasSp   | 3 | 9299.0  | X |
| Ac-SVIIInd     | 2 | 10654.5 | X |
| Can-HBJUSA     | 3 | 10712.0 | X |
| Mom-MR1Ind     | 3 | 10805.3 | X |
| Can-PearlJa    | 3 | 12035.0 | X |
| Can-Ogen2Is    | 3 | 12104.0 | X |
| Ac-SRKSLan     | 3 | 12329.0 | X |
| Mom-KhaInd     | 3 | 12633.7 | X |
| Con-SCKo       | 3 | 12909.7 | X |
| chate-CarIta   | 1 | 13026.0 | X |
| Am-HassanTur   | 3 | 14127.3 | X |
| In-TeSp        | 3 | 16284.0 | X |
| In-TeNinvSp    | 2 | 16839.5 | X |
| Am-NesviGeor   | 3 | 16892.7 | X |
| In-AmCañSp     | 3 | 17339.3 | X |
| Dud-QAPMGeorg  | 3 | 17792.0 | X |
| In-CrabPor     | 2 | 18348.0 | X |
| Ag-CallInd     | 3 | 19227.3 | X |
| Can-SucrFran   | 3 | 19784.3 | X |
| Con-ShiroJa    | 3 | 22293.0 | X |
| Ac-G22843Se    | 3 | 24295.7 | X |
| Con-NanChi     | 3 | 29144.7 | X |
| Ac-TGR1551Zimb | 3 | 29639.3 | X |
| In-AmAoroSp    | 2 | 31414.5 | X |
| In-RoMoch1Sp   | 3 | 31600.0 | X |
| La-ZatIta      | 3 | 32002.0 | X |
| In-HoneyDewUSA | 3 | 34965.7 | X |
| Can-EanaHun    | 3 | 36611.7 | X |
| Dud-QPMAfg     | 3 | 40518.7 | X |
| In-BBredSp     | 3 | 40977.3 | X |
| Ag-WChInd      | 3 | 43767.0 | X |
| Flex-AryaInd   | 3 | 45112.0 | X |
| Ag-TendSud     | 3 | 53145.7 | X |
| Can-NCFran     | 2 | 58008.5 | X |
| Con-FreeCJa    | 3 | 64856.0 | X |

|              |   |           |   |
|--------------|---|-----------|---|
| La-KroFran   | 4 | 66472.8   | X |
| In-PsPiñSp   | 3 | 77123.0   | X |
| Con-PauPol   | 3 | 77954.3   | X |
| Flex-SnakeSA | 3 | 82733.7   | X |
| In-TDewUSA   | 3 | 85586.3   | X |
| In-CGBUSA    | 3 | 88103.7   | X |
| Flex-Co20Ind | 3 | 95739.7   | X |
| Ag-15591Gha  | 3 | 100958.   | X |
| Tibish-Ksud  | 3 | 1.67409E6 | X |

### LSD analysis for ME.3 per accessions

Method: 95.0 percentage LSD

| <i>accessions</i> | <i>Cases</i> | <i>Mean</i> | <i>Homogeneous groups</i> |
|-------------------|--------------|-------------|---------------------------|
| Flex-Co20Ind      | 3            | 750.0       | X                         |
| Ac-TGR1551Zimb    | 3            | 750.0       | X                         |
| Ag-WChInd         | 3            | 750.0       | X                         |
| Ac-SVInd          | 2            | 750.0       | XXX                       |
| Tibish-Ksud       | 3            | 750.0       | X                         |
| chate-CarIta      | 1            | 750.0       | XXX                       |
| Ac-SRKSLan        | 3            | 750.0       | X                         |
| Chi-VellInd       | 3            | 750.0       | X                         |
| In-CGBUSA         | 3            | 750.0       | X                         |
| Con-FreeCJa       | 3            | 750.0       | X                         |
| In-AmAoroSp       | 2            | 750.0       | XXX                       |
| Con-ShiroJa       | 3            | 1886.33     | X                         |
| Con-SCKo          | 3            | 1895.33     | X                         |
| Ag-TendSud        | 3            | 2045.33     | X                         |
| In-HoneyDewUSA    | 3            | 2055.0      | X                         |
| Con-NanChi        | 3            | 2227.0      | X                         |
| Flex-SnakeSA      | 3            | 2393.0      | X                         |
| In-PsPiñSp        | 3            | 2768.67     | X                         |
| Con-GMJJa         | 3            | 3155.67     | X                         |
| Ag-CallInd        | 3            | 6198.33     | X                         |
| Mom-KhaInd        | 3            | 6313.33     | X                         |
| Ag-15591Gha       | 3            | 6329.33     | X                         |
| Con-BaishChi      | 3            | 8090.67     | X                         |
| In-BBredSp        | 3            | 8299.67     | X                         |
| Can-NCFran        | 2            | 8515.0      | XXX                       |
| Ac-G22843Se       | 3            | 9094.67     | X                         |
| Am-TokTaj         | 3            | 9321.67     | X                         |
| In-CrabPor        | 2            | 10336.0     | XXX                       |
| In-LaEscrSp       | 2            | 10456.0     | XXX                       |
| La-CascaPor       | 2            | 12392.0     | XXX                       |
| Can-SemUSA        | 2            | 12462.5     | XXX                       |
| In-TDewUSA        | 3            | 12550.7     | XX                        |
| Con-MielChi       | 3            | 15099.7     | XX                        |
| Flex-AryaInd      | 3            | 17518.0     | XXX                       |
| In-AmCañSp        | 3            | 18376.0     | XXX                       |
| Am-AnaFran        | 3            | 18443.0     | XXX                       |
| Can-DulUSA        | 3            | 23146.0     | XXX                       |
| Con-PauPol        | 3            | 25013.3     | XXX                       |
| In-BBescrSp       | 3            | 29132.7     | XXX                       |
| Can-HBJUSA        | 3            | 29723.7     | XXX                       |
| La-ZatIta         | 3            | 38245.3     | XXX                       |
| Am-korcaRus       | 3            | 40201.3     | XXX                       |
| Can-SucrFran      | 3            | 42969.0     | XXX                       |

|               |   |         |          |
|---------------|---|---------|----------|
| Am-HassanTur  | 3 | 45256.7 | XXX      |
| Can-TopUSA    | 3 | 45595.0 | XXX      |
| Am-KizilUzbe  | 3 | 49489.0 | XXX      |
| Mom-PII24Ind  | 3 | 53534.0 | XXX      |
| In-TeNinvSp2  | 2 | 57576.5 | XXX      |
| Am-KafEgy     | 2 | 61818.5 | XXX      |
| In-RoMoch1Sp  | 3 | 63332.3 | XXX      |
| Can-PearlJa   | 3 | 69107.0 | XXX      |
| Can-NOFran    | 2 | 70080.0 | XXX      |
| In-TeNinvSp   | 2 | 78555.0 | XXX      |
| La-OgenBul    | 3 | 88811.3 | XXX      |
| In-TeSp       | 3 | 99843.7 | XXX      |
| Am-NesviGeor  | 3 | 103472. | XXX      |
| La-KroFran    | 4 | 104417. | XXX      |
| In-ComunSp    | 2 | 106453. | XXXX     |
| Can-GCHUSA    | 3 | 116341. | XXX      |
| Dud-QPMAfg    | 3 | 128742. | XXXXXX   |
| Am-YokIs      | 2 | 133075. | XXXXXXXX |
| La-ErizoSp    | 3 | 137154. | XXXXXXXX |
| Can-WiUSA     | 3 | 139750. | XXXXXXXX |
| Can-VedFran   | 3 | 144386. | XXXXXXXX |
| Can-PGRFran   | 3 | 149372. | XXXXXXXX |
| Can-EfJa      | 3 | 152358. | XXXXXXXX |
| Can-EanaHun   | 3 | 165601. | XXXXXX   |
| Can-GyFran    | 2 | 188765. | XXXX     |
| Dud-QAPMGeorg | 3 | 271164. | XXX      |
| Mom-MR1Ind    | 3 | 282073. | XX       |
| In-LaBolasSp  | 3 | 288776. | X        |
| Can-Ogen2Is   | 3 | 462470. | X        |

#### LSD analysis for ME.1 per accessions

Method: 95.0 percentage LSD

| <i>accessions</i> | <i>Cases</i> | <i>Mean</i> | <i>Homogeneous groups</i> |
|-------------------|--------------|-------------|---------------------------|
| Ac-TGR1551Zimb    | 3            | 750.0       | X                         |
| chate-CarIta      | 1            | 750.0       | XXXXXXXXXX                |
| In-PsPiñSp        | 3            | 750.0       | X                         |
| Tibish-Ksud       | 3            | 750.0       | X                         |
| Con-FreeCJa       | 3            | 750.0       | X                         |
| Ag-WChInd         | 3            | 750.0       | X                         |
| In-CGBUSA         | 3            | 750.0       | X                         |
| Ac-SVIIInd        | 2            | 750.0       | XXXXXX                    |
| Ac-SRKSLan        | 3            | 750.0       | X                         |
| Ag-TendSud        | 3            | 1448.0      | X                         |
| In-AmAoroSp       | 2            | 1703.0      | XXXXXX                    |
| Flex-Co20Ind      | 3            | 1710.33     | X                         |
| Con-ShiroJa       | 3            | 1841.33     | X                         |
| Con-NanChi        | 3            | 2538.0      | X                         |
| Ag-15591Gha       | 3            | 5818.0      | X X                       |
| Chi-VellInd       | 3            | 6406.33     | X X                       |
| Can-NCFran        | 2            | 10824.5     | XXXXXX                    |
| Con-SCKo          | 3            | 11441.0     | X XX                      |
| Flex-SnakeSA      | 3            | 11810.0     | X XX                      |
| In-RoMoch1Sp      | 3            | 12936.3     | X XX                      |
| Mom-KhaInd        | 3            | 13636.0     | X XX                      |
| Con-GMJJa         | 3            | 13874.7     | X XX                      |
| In-HoneyDewUSA    | 3            | 15281.3     | X XX                      |

|               |   |           |            |
|---------------|---|-----------|------------|
| Flex-AryaInd  | 3 | 20314.0   | X XX       |
| Ag-CalInd     | 3 | 21723.7   | XXXX       |
| In-CrabPor    | 2 | 23224.5   | XXXXXXX    |
| Con-MielChi   | 3 | 36143.0   | XXXXXXX    |
| Can-SemUSA    | 2 | 39978.0   | XXXXXXXX   |
| Con-BaishChi  | 3 | 45392.3   | XXXXXX     |
| Ac-G22843Se   | 3 | 50073.3   | XXXXXX     |
| In-TeNinvSp   | 2 | 54868.0   | XXXXXXXX   |
| In-BBredSp    | 3 | 62636.0   | XXXXXXXX   |
| Am-TokTaj     | 3 | 77154.3   | XXXXXXXX   |
| Con-PauPol    | 3 | 77283.3   | XXXXXXXX   |
| In-LaEscrSp   | 2 | 78785.0   | XXXXXXXX   |
| Am-KizilUzbe  | 3 | 79621.7   | XXXXXXXX   |
| In-TDewUSA    | 3 | 81764.7   | XXXXXXXX   |
| Dud-QPMAfg    | 3 | 104242.   | XXXXXXXX   |
| La-CascaPor   | 2 | 110494.   | XXXXXXXX   |
| Am-AnaFran    | 3 | 110652.   | XXXXXXXX   |
| Can-SucrFran  | 3 | 123883.   | XXXXXXXX   |
| Am-KafEgy     | 2 | 126500.   | XXXXXXXX   |
| La-OgenBul    | 3 | 129262.   | XXXXXXXX   |
| In-TeSp       | 3 | 136528.   | XXXXXXXX   |
| Can-TopUSA    | 3 | 150424.   | XXXXXXXX   |
| Am-korcaRus   | 3 | 175608.   | XXXXXXXX   |
| Mom-PII24Ind  | 3 | 176183.   | XXXXXXXX   |
| Can-PearlJa   | 3 | 176256.   | XXXXXXXX   |
| Dud-QAPMGeorg | 3 | 179636.   | XXXXXXXX   |
| Am-YokIs      | 2 | 196398.   | XXXXXXXX   |
| In-AmCañSp    | 3 | 206987.   | XXXXXXXX   |
| Am-HassanTur  | 3 | 221399.   | XXXXXXXX   |
| La-ZatlIta    | 3 | 233006.   | XXXXXXXXXX |
| Can-Ogen2Is   | 3 | 239723.   | XXXXXXXXXX |
| La-KroFran    | 4 | 252579.   | X XXXXXXX  |
| Can-EanaHun   | 3 | 252914.   | XXXXXXXXXX |
| Can-EfJa      | 3 | 253240.   | XXXXXXXXXX |
| Can-DulUSA    | 3 | 255560.   | X XXXXXXX  |
| In-BBescrSp   | 3 | 255830.   | X XXXXXXX  |
| Can-NOFran    | 2 | 272217.   | XXXXXXXXXX |
| Mom-MRIInd    | 3 | 273885.   | XXXXXXXX   |
| Can-HBJUSA    | 3 | 280027.   | XXXXXXXX   |
| In-TeNinvSp2  | 2 | 302918.   | XXXXXXXX   |
| Can-PGRFran   | 3 | 305295.   | XXXXXX     |
| Can-GCHUSA    | 3 | 351335.   | XXXXXX     |
| In-LaBolasSp  | 3 | 401864.   | XXXXXX     |
| Am-NesviGeor  | 3 | 470443.   | XXXXXX     |
| Can-WiUSA     | 3 | 476915.   | XXXX       |
| Can-VedFran   | 3 | 483233.   | XXX        |
| In-ComunSp    | 2 | 538403.   | XX         |
| La-ErizoSp    | 3 | 662799.   | X          |
| Can-GyFran    | 2 | 1.30992E6 | X          |

#### LSD analysis for ME.4 per accessions

Method: 95.0 percentage LSD

| <i>accessions</i> | <i>Cases</i> | <i>Mean</i> | <i>Homogeneous groups</i> |
|-------------------|--------------|-------------|---------------------------|
| Ac-TGR1551Zimb    | 3            | 750.0       | X                         |
| In-HoneyDewUSA    | 3            | 750.0       | X                         |
| Tibish-Ksud       | 3            | 750.0       | X                         |

|              |   |         |            |
|--------------|---|---------|------------|
| Ac-SVIIInd   | 2 | 750.0   | X          |
| Con-FreeCJa  | 3 | 750.0   | X          |
| Con-ShiroJa  | 3 | 750.0   | X          |
| In-CGBUSA    | 3 | 750.0   | X          |
| chate-CarIta | 1 | 750.0   | XXX        |
| In-AmAoroSp  | 2 | 750.0   | X          |
| Ag-WChInd    | 3 | 750.0   | X          |
| In-PsPiñSp   | 3 | 750.0   | X          |
| Ac-SRKSLan   | 3 | 750.0   | X          |
| Flex-Co20Ind | 3 | 750.0   | X          |
| Con-SCKo     | 3 | 1452.0  | X          |
| Ag-TendSud   | 3 | 1638.33 | X          |
| Chi-VellInd  | 3 | 2006.33 | X          |
| Con-NanChi   | 3 | 2250.67 | X          |
| In-BBredSp   | 3 | 3138.33 | X          |
| Con-BaishChi | 3 | 3356.0  | X          |
| In-CrabPor   | 2 | 4018.5  | X          |
| Con-GMJJa    | 3 | 4206.0  | X          |
| Ag-CallInd   | 3 | 4339.67 | X          |
| Flex-SnakeSA | 3 | 4423.67 | X          |
| Ag-15591Gha  | 3 | 5092.67 | X          |
| In-AmCañSp   | 3 | 5726.67 | X          |
| In-LaEscrSp  | 2 | 6023.0  | X          |
| Mom-KhaInd   | 3 | 7149.67 | X          |
| Ac-G22843Se  | 3 | 7962.0  | X          |
| Flex-AryaInd | 3 | 8847.33 | X          |
| In-TDewUSA   | 3 | 9524.67 | X          |
| Am-TokTaj    | 3 | 13790.3 | X          |
| La-CascaPor  | 2 | 14705.0 | X          |
| Can-SemUSA   | 2 | 18156.0 | X          |
| In-BBescrSp  | 3 | 25779.7 | X          |
| Con-PauPol   | 3 | 25824.7 | X          |
| Can-NCFran   | 2 | 27322.0 | X          |
| Con-MielChi  | 3 | 28240.3 | X          |
| Am-korcaRus  | 3 | 37683.7 | X          |
| Am-AnaFran   | 3 | 38172.3 | X          |
| In-TeNinvSp2 | 2 | 44313.5 | XX         |
| In-RoMoch1Sp | 3 | 44452.7 | X          |
| Mom-PII24Ind | 3 | 44663.0 | X          |
| Can-HBJUSA   | 3 | 44995.0 | X          |
| Am-HassanTur | 3 | 52680.0 | X          |
| Can-DulUSA   | 3 | 52927.0 | X          |
| In-TeNinvSp  | 2 | 80472.5 | XXXX       |
| Am-KizilUzbe | 3 | 92610.3 | XXXX       |
| Am-KafEgy    | 2 | 92731.5 | XXXXXX     |
| Can-TopUSA   | 3 | 93675.7 | XXXX       |
| La-KroFran   | 4 | 97145.5 | XXX        |
| Can-PearlJa  | 3 | 108634. | XXXXXX     |
| Can-SucrFran | 3 | 121031. | XXXXXXX    |
| Am-NesviGeor | 3 | 124507. | XXXXXXX    |
| La-ErizoSp   | 3 | 126574. | XXXXXXX    |
| In-ComunSp   | 2 | 130142. | XXXXXXX    |
| La-OgenBul   | 3 | 131576. | XXXXXXX    |
| In-TeSp      | 3 | 141484. | XXXXXXX    |
| La-ZatIta    | 3 | 149934. | XXXXXXX    |
| Am-YokIs     | 2 | 150474. | XXXXXXXXXX |
| Can-EanaHun  | 3 | 160274. | XXXXXXXXXX |

|               |   |         |            |
|---------------|---|---------|------------|
| Dud-QPMAfg    | 3 | 170286. | XXXXXXXX   |
| Can-EfJa      | 3 | 177336. | XXXXXXXX   |
| Can-NOFran    | 2 | 202886. | XXXXXXXXXX |
| Can-WiUSA     | 3 | 264481. | XXXXXXXXXX |
| Can-PGRFran   | 3 | 286204. | XXXXXXXX   |
| Dud-QAPMGeorg | 3 | 299018. | XXXXXX     |
| Can-VedFran   | 3 | 316288. | XXXXXX     |
| In-LaBolasSp  | 3 | 328103. | XXXX       |
| Mom-MR1Ind    | 3 | 364465. | XXXX       |
| Can-GCHUSA    | 3 | 378885. | XXX        |
| Can-GyFran    | 2 | 445397. | XX         |
| Can-Ogen2Is   | 3 | 570565. | X          |

#### LSD analysis for ME.5 per accessions

Method: 95.0 percentage LSD

| <i>accessions</i> | <i>Cases</i> | <i>Mean</i> | <i>Homogeneous groups</i> |
|-------------------|--------------|-------------|---------------------------|
| Ag-TendSud        | 3            | 750.0       | X                         |
| In-HoneyDewUSA    | 3            | 750.0       | X                         |
| chate-CarIta      | 1            | 750.0       | XXXX                      |
| In-CGBUSA         | 3            | 750.0       | X                         |
| In-PsPiñSp        | 3            | 750.0       | X                         |
| In-CrabPor        | 2            | 750.0       | XXXX                      |
| Con-GMJJa         | 3            | 750.0       | X                         |
| Chi-VellInd       | 3            | 750.0       | X                         |
| In-TDewUSA        | 3            | 750.0       | X                         |
| Con-ShiroJa       | 3            | 750.0       | X                         |
| Ag-WChInd         | 3            | 750.0       | X                         |
| Con-SCKo          | 3            | 750.0       | X                         |
| Con-NanChi        | 3            | 750.0       | X                         |
| Flex-Co20Ind      | 3            | 750.0       | X                         |
| In-LaEscrSp       | 2            | 750.0       | XXXX                      |
| In-BBredSp        | 3            | 750.0       | X                         |
| Ac-SRKSLan        | 3            | 750.0       | X                         |
| Tibish-Ksud       | 3            | 750.0       | X                         |
| In-AmCañSp        | 3            | 750.0       | X                         |
| In-RoMoch1Sp      | 3            | 750.0       | X                         |
| Con-FreeCJa       | 3            | 750.0       | X                         |
| Flex-AryaInd      | 3            | 750.0       | X                         |
| Ac-TGR1551Zimb    | 3            | 750.0       | X                         |
| Con-BaishChi      | 3            | 750.0       | X                         |
| In-AmAoroSp       | 2            | 750.0       | XXXX                      |
| Ac-G22843Se       | 3            | 750.0       | X                         |
| Ac-SVInd          | 2            | 750.0       | XXXX                      |
| Ag-15591Gha       | 3            | 1842.67     | XX                        |
| Flex-SnakeSA      | 3            | 2211.67     | XX                        |
| Can-SemUSA        | 2            | 2537.0      | XXXX                      |
| Mom-KhaInd        | 3            | 2843.0      | XXX                       |
| Con-MielChi       | 3            | 3595.0      | XXX                       |
| In-TeNinvSp2      | 2            | 3599.5      | XXXX                      |
| In-TeNinvSp       | 2            | 3984.5      | XXXX                      |
| Con-PauPol        | 3            | 4675.0      | XXXX                      |
| Can-NCFran        | 2            | 5279.0      | XXXX                      |
| Ag-CallInd        | 3            | 6014.0      | XXXX                      |
| Can-PearlJa       | 3            | 6424.33     | XXXX                      |
| Am-TokTaj         | 3            | 6952.0      | XXXX                      |
| Am-AnaFran        | 3            | 7083.67     | XXXX                      |

|               |   |         |         |
|---------------|---|---------|---------|
| Mom-PII24Ind  | 3 | 7940.33 | XXXX    |
| La-CascaPor   | 2 | 8863.5  | XXXX    |
| Can-HBJUSA    | 3 | 8870.67 | XXXX    |
| In-TeSp       | 3 | 9822.67 | XXXX    |
| In-BBescrSp   | 3 | 10254.0 | XXXX    |
| Can-TopUSA    | 3 | 11290.3 | XXXX    |
| Am-HassanTur  | 3 | 12824.7 | XXXX    |
| Can-EfJa      | 3 | 13329.7 | XXXX    |
| Am-korcaRus   | 3 | 15291.3 | XXXX    |
| Am-YokIs      | 2 | 15542.0 | XXXX    |
| Can-EanaHun   | 3 | 19062.0 | XXXX    |
| Can-DulUSA    | 3 | 20934.0 | XXXXX   |
| Am-KizilUzbe  | 3 | 21401.7 | XXXXX   |
| La-ErizoSp    | 3 | 21475.3 | XXXXX   |
| La-OgenBul    | 3 | 24127.3 | XXXXX   |
| Am-KafEgy     | 2 | 24379.0 | XXXXXX  |
| La-ZatlIta    | 3 | 24629.0 | XXXXX   |
| Dud-QAPMGeorg | 3 | 25456.7 | XXXXX   |
| Dud-QPMafg    | 3 | 26666.7 | XXXXXX  |
| In-ComunSp    | 2 | 30571.0 | XXXXXX  |
| Can-GCHUSA    | 3 | 31009.3 | XXXXXX  |
| La-KroFran    | 4 | 35670.3 | XXXXXX  |
| Am-NesviGeor  | 3 | 40579.3 | XXXXXX  |
| Can-PGRFran   | 3 | 42136.7 | XXXXX   |
| Can-WiUSA     | 3 | 43701.7 | XXXX    |
| Can-NOFran    | 2 | 44170.0 | XXXXXXX |
| Can-Ogen2Is   | 3 | 59942.7 | XXX     |
| Can-VedFran   | 3 | 65780.0 | XX      |
| Can-SucrFran  | 3 | 76476.7 | XX      |
| In-LaBolasSp  | 3 | 77603.7 | XX      |
| Mom-MR1Ind    | 3 | 114180. | XX      |
| Can-GyFran    | 2 | 150242. | X       |

#### LSD analysis for PE.4 per accessions

Method: 95.0 percentage LSD

| <i>accessions</i> | <i>Cases</i> | <i>Mean</i> | <i>Homogeneous groups</i> |
|-------------------|--------------|-------------|---------------------------|
| Ac-SRKSLan        | 3            | 758.667     | X                         |
| Flex-SnakeSA      | 3            | 768.333     | X                         |
| In-HoneyDewUSA    | 3            | 780.667     | X                         |
| chate-CarIta      | 1            | 828.0       | XXXXX                     |
| In-CrabPor        | 2            | 881.0       | XX                        |
| Ac-SVIIInd        | 2            | 901.0       | XX                        |
| In-BBescrSp       | 3            | 1065.67     | X                         |
| In-CGBUSA         | 3            | 1135.67     | X                         |
| In-RoMoch1Sp      | 3            | 2589.67     | X                         |
| Ac-TGR1551Zimb    | 3            | 3274.33     | X                         |
| Am-TokTaj         | 3            | 3516.67     | X                         |
| In-PsPiñSp        | 3            | 3642.0      | X                         |
| In-BBredSp        | 3            | 4633.0      | XX                        |
| Tibish-Ksud       | 3            | 7010.0      | XX                        |
| Con-MielChi       | 3            | 7107.0      | XX                        |
| Con-ShiroJa       | 3            | 8277.0      | XX                        |
| In-AmAoroSp       | 2            | 8341.0      | XXX                       |
| Chi-VellInd       | 3            | 8479.0      | XX                        |
| Mom-KhaInd        | 3            | 8929.33     | XX                        |
| Con-NanChi        | 3            | 9340.33     | XX                        |

|               |   |         |          |
|---------------|---|---------|----------|
| Ag-WChInd     | 3 | 10017.3 | XX       |
| Ag-CallInd    | 3 | 10987.7 | XX       |
| Can-SemUSA    | 2 | 11004.0 | XXXXX    |
| In-AmCañSp    | 3 | 11723.3 | XXX      |
| In-TDewUSA    | 3 | 11808.0 | XXX      |
| Can-SucrFran  | 3 | 13252.3 | XXX      |
| Can-HBJUSA    | 3 | 13352.0 | XXX      |
| Ac-G22843Se   | 3 | 15398.0 | XXX      |
| Con-PauPol    | 3 | 16658.0 | XXX      |
| La-ZatIta     | 3 | 16693.0 | XXX      |
| Ag-TendSud    | 3 | 17419.0 | XXXXX    |
| Con-SCKo      | 3 | 20513.0 | XXXXXX   |
| Con-BaishChi  | 3 | 20718.0 | XXXXXX   |
| Con-GMJJa     | 3 | 21228.3 | XXXXXX   |
| Can-EanaHun   | 3 | 23598.0 | XXXXXX   |
| Can-TopUSA    | 3 | 23885.3 | XXXXXX   |
| Am-KizilUzbe  | 3 | 25182.0 | XXXXXX   |
| Flex-AryaInd  | 3 | 26230.3 | XXXXXX   |
| Flex-Co20Ind  | 3 | 27421.3 | XXXXXX   |
| Con-FreeCJa   | 3 | 27434.7 | XXXXXXX  |
| Can-GyFran    | 2 | 27651.5 | XXXXXXX  |
| In-TeNinvSp   | 2 | 33458.0 | XXXXXXX  |
| In-TeNinvSp2  | 2 | 35980.0 | XXXXXXX  |
| Am-AnaFran    | 3 | 36304.3 | XXXXXXX  |
| La-ErizoSp    | 3 | 36707.3 | XXXXXXX  |
| Can-PearlJa   | 3 | 36756.7 | XXXXXXX  |
| Can-DulUSA    | 3 | 37798.3 | XXXXXXX  |
| Can-VedFran   | 3 | 39145.0 | XXXXXXX  |
| Dud-QPMAfg    | 3 | 41045.3 | XXXXXXX  |
| Am-korcaRus   | 3 | 44018.3 | XXXXXXX  |
| Mom-PII24Ind  | 3 | 44335.0 | XXXXXXX  |
| La-CascaPor   | 2 | 46740.5 | XXXXXXXX |
| Can-NOFran    | 2 | 46884.5 | XXXXXXXX |
| Can-PGRFran   | 3 | 47452.3 | XXXXXXX  |
| In-LaEscrSp   | 2 | 48317.0 | XXXXXXXX |
| Can-Ogen2Is   | 3 | 50915.3 | XXXXXXX  |
| Can-WiUSA     | 3 | 55352.0 | XXXXXXXX |
| Can-EfJa      | 3 | 57757.0 | XXXXXXXX |
| Am-HassanTur  | 3 | 58164.0 | XXXXXXXX |
| Mom-MR1Ind    | 3 | 66463.0 | XXXXXXX  |
| Am-KafEgy     | 2 | 67583.0 | XXXXXXXX |
| In-LaBolasSp  | 3 | 74113.0 | XXXXXX   |
| Dud-QAPMGeorg | 3 | 79793.3 | XXXXXX   |
| Can-NCFran    | 2 | 81201.0 | XXXXXXX  |
| La-OgenBul    | 3 | 81854.7 | XXXXX    |
| In-ComunSp    | 2 | 87185.5 | XXXXXXX  |
| Am-NesviGeor  | 3 | 89869.3 | XXX      |
| La-KroFran    | 4 | 109677. | XXX      |
| Ag-15591Gha   | 3 | 138152. | XXX      |
| Can-GCHUSA    | 3 | 153399. | XX       |
| In-TeSp       | 3 | 183702. | X        |
| Am-YokIs      | 2 | 200629. | X        |

#### LSD analysis for PE.2 per accessions

Method: 95.0 percentage LSD

| <i>accessions</i> | <i>Cases</i> | <i>Mean</i> | <i>Homogeneous groups</i> |
|-------------------|--------------|-------------|---------------------------|
|-------------------|--------------|-------------|---------------------------|



|                |   |         |        |
|----------------|---|---------|--------|
| In-AmAoroSp    | 2 | 750.0   | XX     |
| Ac-SVIInd      | 2 | 750.0   | XX     |
| Ac-TGR1551Zimb | 3 | 750.0   | X      |
| In-PsPiñSp     | 3 | 750.0   | X      |
| Flex-Co20Ind   | 3 | 750.0   | X      |
| In-CGBUSA      | 3 | 750.0   | X      |
| In-HoneyDewUSA | 3 | 750.0   | X      |
| Ag-TendSud     | 3 | 750.0   | X      |
| chate-CarIta   | 1 | 750.0   | XXXX   |
| Ag-WChInd      | 3 | 750.0   | X      |
| Ac-SRKSLan     | 3 | 750.0   | X      |
| Tibish-Ksud    | 3 | 750.0   | X      |
| In-CrabPor     | 2 | 750.0   | XX     |
| In-BBredSp     | 3 | 750.0   | X      |
| Con-FreeCJa    | 3 | 750.0   | X      |
| Flex-SnakeSA   | 3 | 1702.0  | X      |
| Chi-VellInd    | 3 | 2888.33 | X      |
| Am-TokTaj      | 3 | 3669.0  | X      |
| In-RoMoch1Sp   | 3 | 3817.0  | X      |
| In-AmCañSp     | 3 | 4912.67 | X      |
| In-BBescrSp    | 3 | 5481.0  | X      |
| Ac-G22843Se    | 3 | 5731.33 | X      |
| Ag-CallInd     | 3 | 8113.33 | X      |
| Can-SemUSA     | 2 | 8335.0  | XX     |
| Can-HBJUSA     | 3 | 11833.3 | X      |
| In-TDewUSA     | 3 | 13814.0 | X      |
| Mom-KhaInd     | 3 | 15551.7 | XX     |
| Con-ShiroJa    | 3 | 15691.3 | XX     |
| In-LaEscrSp    | 2 | 16285.5 | XX     |
| Con-NanChi     | 3 | 22161.3 | XX     |
| Con-PauPol     | 3 | 22966.3 | XX     |
| Ag-15591Gha    | 3 | 23976.3 | XX     |
| Can-PearlJa    | 3 | 24210.7 | XX     |
| In-TeNinvSp    | 2 | 26897.5 | XX     |
| Flex-AryaInd   | 3 | 32677.3 | XX     |
| Can-NCFran     | 2 | 34187.0 | XXX    |
| Con-MielChi    | 3 | 34695.0 | XX     |
| Con-GMJJa      | 3 | 35098.0 | XX     |
| Am-KizilUzbe   | 3 | 36572.7 | XX     |
| Con-SCKo       | 3 | 37167.3 | XX     |
| Can-SucrFran   | 3 | 38603.3 | XX     |
| Can-EanaHun    | 3 | 41070.3 | XX     |
| Con-BaishChi   | 3 | 41738.3 | XX     |
| Am-HassanTur   | 3 | 43269.3 | XX     |
| La-ErizoSp     | 3 | 47400.0 | XXX    |
| Am-korcaRus    | 3 | 47416.3 | XXX    |
| In-TeNinvSp2   | 2 | 55692.5 | XXXXX  |
| Mom-PII24Ind   | 3 | 56130.0 | XXXX   |
| Can-TopUSA     | 3 | 67610.3 | XXXXXX |
| La-ZatlIta     | 3 | 72947.7 | XXXXXX |
| Can-WiUSA      | 3 | 76009.0 | XXXXXX |
| Can-DulUSA     | 3 | 80344.7 | XXXXXX |
| Can-GyFran     | 2 | 87569.0 | XXXXXX |
| La-CascaPor    | 2 | 88741.5 | XXXXXX |
| Am-KafEgy      | 2 | 101516. | XXXXXX |
| Dud-QPMAfg     | 3 | 103360. | XXXXXX |
| Can-VedFran    | 3 | 113544. | XXXXXX |

|               |   |         |            |
|---------------|---|---------|------------|
| Can-EfJa      | 3 | 113762. | XXXXXX     |
| Am-NesviGeor  | 3 | 117527. | XXXXXX     |
| In-ComunSp    | 2 | 128226. | XXXXXXXX   |
| Can-NOFran    | 2 | 156836. | XXXXXXXXXX |
| La-KroFran    | 4 | 163351. | XXXXXX     |
| In-LaBolasSp  | 3 | 171151. | XXXXXX     |
| Can-Ogen2Is   | 3 | 171186. | XXXXXX     |
| Can-PGRFran   | 3 | 178969. | XXXXXX     |
| Mom-MR1Ind    | 3 | 186898. | XXXXXX     |
| Am-AnaFran    | 3 | 192448. | XXXXXX     |
| In-TeSp       | 3 | 254119. | XXXX       |
| Dud-QAPMGeorg | 3 | 280591. | XXXX       |
| La-OgenBul    | 3 | 293848. | XXX        |
| Am-YokIs      | 2 | 315993. | XX         |
| Can-GCHUSA    | 3 | 403135. | X          |

#### LSD analysis for PE.1 per accessions

Method: 95.0 percentage LSD

| <i>accessions</i> | <i>Cases</i> | <i>Mean</i> | <i>Homogeneous groups</i> |
|-------------------|--------------|-------------|---------------------------|
| In-HoneyDewUSA    | 3            | 750.0       | X                         |
| Ac-SVIIInd        | 2            | 750.0       | XXX                       |
| In-CrabPor        | 2            | 750.0       | XXX                       |
| Tibish-Ksud       | 3            | 750.0       | X                         |
| chate-Carlta      | 1            | 750.0       | XXXXXXXX                  |
| In-RoMoch1Sp      | 3            | 750.0       | X                         |
| Ag-TendSud        | 3            | 750.0       | X                         |
| In-AmAoroSp       | 2            | 750.0       | XXX                       |
| Can-SemUSA        | 2            | 750.0       | XXX                       |
| Ac-TGR1551Zimb    | 3            | 750.0       | X                         |
| Ac-SRKSLan        | 3            | 750.0       | X                         |
| In-PsPiñSp        | 3            | 750.0       | X                         |
| Con-FreeCJa       | 3            | 750.0       | X                         |
| In-BBescrSp       | 3            | 750.0       | X                         |
| In-CGBUSA         | 3            | 750.0       | X                         |
| In-BBredSp        | 3            | 750.0       | X                         |
| Ag-WChInd         | 3            | 750.0       | X                         |
| Flex-Co20Ind      | 3            | 750.0       | X                         |
| Chi-VellInd       | 3            | 750.0       | X                         |
| Flex-SnakeSA      | 3            | 750.0       | X                         |
| Con-MielChi       | 3            | 2375.33     | XX                        |
| In-TeNinvSp       | 2            | 3197.0      | XXX X                     |
| Can-HBJUSA        | 3            | 3310.67     | XX                        |
| Con-NanChi        | 3            | 3354.0      | XX                        |
| Con-ShiroJa       | 3            | 3356.0      | XX                        |
| Con-PauPol        | 3            | 3433.0      | XX                        |
| Ac-G22843Se       | 3            | 3482.67     | XX                        |
| In-TDewUSA        | 3            | 3593.33     | XX                        |
| Con-GMJJa         | 3            | 3929.33     | XX                        |
| Can-NCFran        | 2            | 4103.0      | XXXXXX                    |
| Ag-15591Gha       | 3            | 4450.67     | XX                        |
| In-AmCañSp        | 3            | 4964.0      | XX                        |
| Con-SCKo          | 3            | 6209.0      | XXX                       |
| Am-TokTaj         | 3            | 6457.0      | XXX                       |
| Con-BaishChi      | 3            | 8130.67     | XXX                       |
| Mom-KhaInd        | 3            | 9653.0      | XXX                       |
| Ag-CallInd        | 3            | 11129.7     | XXX X                     |

|               |   |         |            |
|---------------|---|---------|------------|
| Can-PearlJa   | 3 | 15007.3 | XXXXXX     |
| In-LaEscrSp   | 2 | 16385.5 | XXXXXX     |
| Can-TopUSA    | 3 | 20304.3 | XXXXXX     |
| Can-EanaHun   | 3 | 21962.3 | XXXXXX     |
| In-TeNinvSp2  | 2 | 22868.0 | XXXXXXXX   |
| La-ErizoSp    | 3 | 25572.0 | XXXXXX     |
| Am-KizilUzbe  | 3 | 26559.3 | XXXXXX     |
| Dud-QPMAfg    | 3 | 28429.3 | XXXXXXXX   |
| Can-Ogen2Is   | 3 | 29200.3 | XXXXXXXX   |
| Flex-AryaInd  | 3 | 29285.3 | XXXXXXXX   |
| Mom-PII24Ind  | 3 | 29608.0 | XXXXXXXX   |
| Can-DulUSA    | 3 | 30094.7 | XXXXXXXX   |
| Am-HassanTur  | 3 | 35055.3 | XXXXXXXX   |
| Can-WiUSA     | 3 | 36386.3 | XXXXXXXX   |
| Can-SucrFran  | 3 | 39046.3 | XXXXXXXX   |
| Am-KafEgy     | 2 | 41128.5 | XXXXXXXXXX |
| Am-korcaRus   | 3 | 42401.0 | XXXXXXXXXX |
| Can-PGRFran   | 3 | 43226.7 | XXXXXXXXXX |
| Can-EfJa      | 3 | 44040.7 | XXXXXXXXXX |
| In-LaBolasSp  | 3 | 49546.0 | XXXXXXXXXX |
| La-CascaPor   | 2 | 49747.0 | XXXXXXXXXX |
| In-ComunSp    | 2 | 52433.0 | XXXXXXXXXX |
| Can-GyFran    | 2 | 53512.0 | XXXXXXXXXX |
| Am-AnaFran    | 3 | 54895.7 | XXXXXXXXXX |
| Can-VedFran   | 3 | 61566.0 | XXXXXXXXXX |
| Dud-QAPMGeorg | 3 | 64013.0 | XXXXXXX    |
| La-OgenBul    | 3 | 68191.7 | XXXXXX     |
| La-KroFran    | 4 | 70503.5 | X XXX      |
| Can-NOFran    | 2 | 80365.5 | XXXXXX     |
| Am-YokIs      | 2 | 85176.5 | XXX        |
| Am-NesviGeor  | 3 | 90142.0 | XX         |
| La-ZatIta     | 3 | 104222. | XX         |
| In-TeSp       | 3 | 161437. | X          |
| Can-GCHUSA    | 3 | 165666. | X          |
| Mom-MR1Ind    | 3 | 260234. | X          |

#### LSD analysis for PE.3 per accessions

Method: 95.0 percentage LSD

| <i>accessions</i> | <i>Cases</i> | <i>Mean</i> | <i>Homogeneous groups</i> |
|-------------------|--------------|-------------|---------------------------|
| Mom-KhaInd        | 3            | 750.0       | X                         |
| Flex-SnakeSA      | 3            | 750.0       | X                         |
| Ac-G22843Se       | 3            | 750.0       | X                         |
| Ag-WChInd         | 3            | 750.0       | X                         |
| Ac-TGR1551Zimb    | 3            | 750.0       | X                         |
| Con-BaishChi      | 3            | 750.0       | X                         |
| Ag-15591Gha       | 3            | 750.0       | X                         |
| Con-ShiroJa       | 3            | 750.0       | X                         |
| In-RoMoch1Sp      | 3            | 750.0       | X                         |
| In-AmAoroSp       | 2            | 750.0       | XX                        |
| In-HoneyDewUSA    | 3            | 750.0       | X                         |
| Ac-SRKSLan        | 3            | 750.0       | X                         |
| In-LaEscrSp       | 2            | 750.0       | XX                        |
| In-CrabPor        | 2            | 750.0       | XX                        |
| In-CGBUSA         | 3            | 750.0       | X                         |
| Can-HBJUSA        | 3            | 750.0       | X                         |
| Flex-Co20Ind      | 3            | 750.0       | X                         |

|               |   |         |          |
|---------------|---|---------|----------|
| Con-FreeCJa   | 3 | 750.0   | X        |
| In-AmCañSp    | 3 | 750.0   | X        |
| In-BBredSp    | 3 | 750.0   | X        |
| Tibish-Ksud   | 3 | 750.0   | X        |
| chate-CarIta  | 1 | 750.0   | XXXX     |
| Chi-VellInd   | 3 | 750.0   | X        |
| Ag-CallInd    | 3 | 750.0   | X        |
| Ag-TendSud    | 3 | 750.0   | X        |
| In-BBescrSp   | 3 | 750.0   | X        |
| Can-SemUSA    | 2 | 750.0   | XX       |
| Am-TokTaj     | 3 | 750.0   | X        |
| In-TDewUSA    | 3 | 750.0   | X        |
| Ac-SVIIInd    | 2 | 750.0   | XX       |
| In-PsPiñSp    | 3 | 750.0   | X        |
| Con-SCKo      | 3 | 2076.0  | X        |
| Con-PauPol    | 3 | 2175.33 | X        |
| Flex-AryaInd  | 3 | 2484.0  | X        |
| In-TeNinvSp   | 2 | 2807.0  | XX       |
| Con-NanChi    | 3 | 3063.33 | X        |
| Can-PearlJa   | 3 | 3210.67 | X        |
| Con-GMJJa     | 3 | 3704.0  | XX       |
| Mom-PII24Ind  | 3 | 3731.67 | XX       |
| La-ErizoSp    | 3 | 4702.0  | XX       |
| Con-MielChi   | 3 | 4777.33 | XX       |
| Am-KizilUzbe  | 3 | 5469.33 | XX       |
| Can-EanaHun   | 3 | 5564.0  | XX       |
| Am-korcaRus   | 3 | 7175.33 | XX       |
| Dud-QPMAfg    | 3 | 8805.0  | XX       |
| Am-HassanTur  | 3 | 8819.0  | XX       |
| In-TeNinvSp2  | 2 | 9042.0  | XXX      |
| Can-TopUSA    | 3 | 12605.0 | XXX      |
| Can-WiUSA     | 3 | 13263.0 | XXXX     |
| Can-NCFran    | 2 | 14670.5 | XXXXX    |
| Can-SucrFran  | 3 | 16061.3 | XXXXX    |
| In-ComunSp    | 2 | 16447.5 | XXXXXXXX |
| La-CascaPor   | 2 | 16895.0 | XXXXXXXX |
| Can-EfJa      | 3 | 18357.0 | XXXXXXXX |
| In-TeSp       | 3 | 18770.7 | XXXXXXXX |
| Can-DulUSA    | 3 | 19714.7 | XXXXXXXX |
| Am-KafEgy     | 2 | 20789.5 | XXXXXXXX |
| Am-NesviGeor  | 3 | 21403.7 | XXXXXXXX |
| Can-Ogen2Is   | 3 | 21572.7 | XXXXXXXX |
| La-ZatIta     | 3 | 25328.3 | XXXXXXXX |
| Can-VedFran   | 3 | 26192.3 | XXXXXXXX |
| In-LaBolasSp  | 3 | 34380.3 | XXXXXXXX |
| La-KroFran    | 4 | 39447.5 | XXXXXXXX |
| Dud-QAPMGeorg | 3 | 43647.3 | XXXXXX   |
| Can-PGRFran   | 3 | 46552.0 | XXXXXX   |
| La-OgenBul    | 3 | 51751.7 | XX       |
| Can-GyFran    | 2 | 52427.0 | XXXX     |
| Can-NOFran    | 2 | 53968.5 | XXX      |
| Mom-MRIInd    | 3 | 59481.0 | X        |
| Am-YokIs      | 2 | 64263.5 | XX       |
| Am-AnaFran    | 3 | 96505.3 | X        |
| Can-GCHUSA    | 3 | 201307. | X        |

LSD analysis for A.1 per accessions

Method: 95.0 percentage LSD

| <i>accessions</i> | <i>Cases</i> | <i>Mean</i> | <i>Homogeneous groups</i> |
|-------------------|--------------|-------------|---------------------------|
| Ac-TGR1551Zimb    | 3            | 11816.3     | X                         |
| Ac-SRKSLan        | 3            | 16844.3     | XX                        |
| Mom-KhaInd        | 3            | 18978.3     | XXX                       |
| In-AmAoroSp       | 2            | 21306.0     | XXXX                      |
| Mom-PII24Ind      | 3            | 26035.3     | XXX                       |
| In-AmCañSp        | 3            | 26701.3     | XXX                       |
| Can-DulUSA        | 3            | 26849.0     | XXX                       |
| La-CascaPor       | 2            | 27024.5     | XXXX                      |
| Can-SucrFran      | 3            | 27377.0     | XXXX                      |
| In-CrabPor        | 2            | 27745.5     | XXXX                      |
| In-HoneyDewUSA    | 3            | 30808.0     | XXXX                      |
| Ac-SVInd          | 2            | 32692.0     | XXXX                      |
| Con-BaishChi      | 3            | 33517.7     | XXXX                      |
| Mom-MRIInd        | 3            | 35044.7     | XXXX                      |
| Flex-AryaInd      | 3            | 36102.7     | XXXX                      |
| Can-WiUSA         | 3            | 37282.0     | XXXX                      |
| Con-GMJJa         | 3            | 38309.0     | XXXX                      |
| In-ComunSp        | 2            | 38652.5     | XXXXXX                    |
| Am-korcaRus       | 3            | 39285.7     | XXXX                      |
| Can-GyFran        | 2            | 39334.5     | XXXXXX                    |
| Flex-Co20Ind      | 3            | 41763.7     | XXXX                      |
| Am-YokIs          | 2            | 43017.0     | XXXXXX                    |
| Can-TopUSA        | 3            | 43092.0     | XXXX                      |
| In-TeSp           | 3            | 46023.3     | XXXX                      |
| In-BBredSp        | 3            | 47089.3     | XXXX                      |
| Am-KizilUzbe      | 3            | 47202.0     | XXXX                      |
| Can-EanaHun       | 3            | 48241.7     | XXXX                      |
| In-TDewUSA        | 3            | 48674.0     | XXXXXX                    |
| Can-PGRFran       | 3            | 48916.0     | XXXXXX                    |
| Can-VedFran       | 3            | 49173.7     | XXXXXX                    |
| Can-GCHUSA        | 3            | 49671.3     | XXXXXX                    |
| In-PsPiñSp        | 3            | 49915.7     | XXXXXX                    |
| La-KroFran        | 4            | 52018.3     | XXXX                      |
| Can-EfJa          | 3            | 52492.0     | XXXXXX                    |
| Can-NOFran        | 2            | 54742.5     | XXXXXX                    |
| Can-HBJUSA        | 3            | 55035.7     | XXXXXX                    |
| In-CGBUSA         | 3            | 56158.3     | XXXXXX                    |
| Con-FreeCJa       | 3            | 56719.3     | XXXXXX                    |
| Dud-QPMAfg        | 3            | 58470.7     | XXXXXX                    |
| Con-ShiroJa       | 3            | 59335.0     | XXXXXX                    |
| Am-AnaFran        | 3            | 60654.0     | XXXXXX                    |
| chate-Carlta      | 1            | 61969.0     | XXXXXXXXXX                |
| Can-SemUSA        | 2            | 62535.5     | XXXXXXXX                  |
| Am-KafEgy         | 2            | 63018.5     | XXXXXXXX                  |
| Can-PearlJa       | 3            | 63635.7     | XXXXXX                    |
| Am-TokTaj         | 3            | 65182.3     | XXXXXX                    |
| Chi-VellInd       | 3            | 65454.0     | XXXXXX                    |
| In-LaEscrSp       | 2            | 67105.0     | XXXXXX                    |
| Con-SCKo          | 3            | 68271.3     | XXXXXX                    |
| Can-NCFran        | 2            | 71878.5     | XXXXXX                    |
| Dud-QAPMGeorg     | 3            | 72852.0     | XXXXXX                    |
| Con-NanChi        | 3            | 76510.0     | XXXXXX                    |
| Am-NesviGeor      | 3            | 79383.0     | XXXXXX                    |
| Am-HassanTur      | 3            | 79967.0     | XXXXXX                    |

|              |   |         |          |
|--------------|---|---------|----------|
| In-RoMoch1Sp | 3 | 86911.0 | XXXXXXXX |
| La-ZatIta    | 3 | 88694.3 | XXXXXXXX |
| Tibish-Ksud  | 3 | 95260.7 | XXXXXXXX |
| In-LaBolasSp | 3 | 100042. | XXXXXXXX |
| La-ErizoSp   | 3 | 100586. | XXXXXXXX |
| La-OgenBul   | 3 | 105045. | XXXXXXXX |
| Ac-G22843Se  | 3 | 108260. | XXXXXXXX |
| In-BBescrSp  | 3 | 110093. | XXXXXXXX |
| In-TeNinvSp2 | 2 | 111986. | XXXXXXXX |
| In-TeNinvSp  | 2 | 130183. | XXXXXXXX |
| Con-MielChi  | 3 | 140396. | XXXXXXX  |
| Ag-WChInd    | 3 | 148387. | XXXXXXX  |
| Flex-SnakeSA | 3 | 165305. | XXXXXX   |
| Ag-TendSud   | 3 | 177233. | XXXXX    |
| Can-Ogen2Is  | 3 | 189355. | XXX      |
| Con-PauPol   | 3 | 197116. | XX       |
| Ag-15591Gha  | 3 | 216939. | X        |
| Ag-CallInd   | 3 | 901648. | X        |

### LSD analysis for A.2 per accessions

Method: 95.0 percentage LSD

| <i>accessions</i> | <i>Cases</i> | <i>Mean</i> | <i>Homogeneous groups</i> |
|-------------------|--------------|-------------|---------------------------|
| Con-ShiroJa       | 3            | 750.0       | X                         |
| Am-HassanTur      | 3            | 750.0       | X                         |
| Mom-MR1Ind        | 3            | 750.0       | X                         |
| In-HoneyDewUSA    | 3            | 750.0       | X                         |
| Flex-Co20Ind      | 3            | 750.0       | X                         |
| In-AmCañSp        | 3            | 750.0       | X                         |
| Flex-AryaInd      | 3            | 750.0       | X                         |
| Flex-SnakeSA      | 3            | 750.0       | X                         |
| In-TDewUSA        | 3            | 750.0       | X                         |
| Tibish-Ksud       | 3            | 750.0       | X                         |
| La-ZatIta         | 3            | 750.0       | X                         |
| In-AmAoroSp       | 2            | 750.0       | X                         |
| In-BBredSp        | 3            | 750.0       | X                         |
| Am-KizilUzbe      | 3            | 750.0       | X                         |
| La-CascaPor       | 2            | 750.0       | X                         |
| chate-CarIta      | 1            | 750.0       | X                         |
| In-PsPiñSp        | 3            | 750.0       | X                         |
| Can-PearlJa       | 3            | 750.0       | X                         |
| Can-WiUSA         | 3            | 750.0       | X                         |
| In-TeSp           | 3            | 750.0       | X                         |
| Am-KafEgy         | 2            | 750.0       | X                         |
| Can-NCFran        | 2            | 750.0       | X                         |
| In-RoMoch1Sp      | 3            | 750.0       | X                         |
| Ag-CallInd        | 3            | 750.0       | X                         |
| La-KroFran        | 4            | 750.0       | X                         |
| In-CGBUSA         | 3            | 750.0       | X                         |
| In-CrabPor        | 2            | 750.0       | X                         |
| Can-SucrFran      | 3            | 750.0       | X                         |
| Mom-KhaInd        | 3            | 750.0       | X                         |
| Ac-SVIInd         | 2            | 750.0       | X                         |
| Am-korcaRus       | 3            | 750.0       | X                         |
| Chi-VellInd       | 3            | 750.0       | X                         |
| Ac-TGR1551Zimb    | 3            | 750.0       | X                         |
| Ac-SRKSLan        | 3            | 750.0       | X                         |

|               |   |         |     |
|---------------|---|---------|-----|
| In-TeNinvSp2  | 2 | 750.0   | X   |
| Can-EanaHun   | 3 | 750.0   | X   |
| Con-NanChi    | 3 | 750.0   | X   |
| Con-FreeCJa   | 3 | 750.0   | X   |
| Can-GCHUSA    | 3 | 750.0   | X   |
| La-OgenBul    | 3 | 1557.0  | X   |
| In-LaBolasSp  | 3 | 1703.67 | X   |
| Con-PauPol    | 3 | 2481.67 | X   |
| Con-GMJJa     | 3 | 2547.33 | X   |
| Can-PGRFran   | 3 | 2680.0  | X   |
| Dud-QPMAfg    | 3 | 2713.0  | X   |
| Can-VedFran   | 3 | 2765.33 | X   |
| Ag-TendSud    | 3 | 3015.33 | X   |
| Am-TokTaj     | 3 | 3601.33 | X   |
| In-BBescrSp   | 3 | 3644.33 | X   |
| Can-Ogen2Is   | 3 | 3790.33 | X   |
| In-LaEscrSp   | 2 | 3937.0  | X   |
| Ac-G22843Se   | 3 | 7190.67 | X   |
| Am-AnaFran    | 3 | 8653.0  | X   |
| Can-EfJa      | 3 | 8772.33 | X   |
| In-TeNinvSp   | 2 | 10230.0 | X   |
| Con-SCKo      | 3 | 10348.3 | X   |
| Am-YokIs      | 2 | 11515.5 | X   |
| La-ErizoSp    | 3 | 12419.7 | X   |
| Am-NesviGeor  | 3 | 14901.0 | X   |
| Ag-15591Gha   | 3 | 28070.7 | XX  |
| Mom-PII24Ind  | 3 | 28865.7 | XX  |
| Dud-QAPMGeorg | 3 | 30121.3 | XX  |
| Con-MielChi   | 3 | 39908.0 | XXX |
| In-ComunSp    | 2 | 83993.5 | XXX |
| Can-HBJUSA    | 3 | 86489.0 | XX  |
| Can-TopUSA    | 3 | 86863.7 | XX  |
| Can-NOFran    | 2 | 120165. | X   |
| Ag-WChInd     | 3 | 123154. | X   |
| Can-GyFran    | 2 | 124804. | X   |
| Can-DulUSA    | 3 | 126649. | X   |
| Con-BaishChi  | 3 | 134478. | X   |
| Can-SemUSA    | 2 | 384956. | X   |

### LSD analysis for A.3 per accessions

Method: 95.0 percentage LSD

| <i>accessions</i> | <i>Cases</i> | <i>Mean</i> | <i>Homogeneous groups</i> |
|-------------------|--------------|-------------|---------------------------|
| In-TDewUSA        | 3            | 750.0       | X                         |
| Ac-TGR1551Zimb    | 3            | 750.0       | X                         |
| In-CrabPor        | 2            | 750.0       | XX                        |
| In-HoneyDewUSA    | 3            | 750.0       | X                         |
| Con-BaishChi      | 3            | 750.0       | X                         |
| Dud-QAPMGeorg     | 3            | 750.0       | X                         |
| Ac-SRKSLan        | 3            | 750.0       | X                         |
| In-AmCañSp        | 3            | 750.0       | X                         |
| In-AmAoroSp       | 2            | 750.0       | XX                        |
| In-BBescrSp       | 3            | 1175.0      | XX                        |
| Chi-VellInd       | 3            | 1360.0      | XX                        |
| Con-ShiroJa       | 3            | 1371.33     | XX                        |
| Mom-PII24Ind      | 3            | 1461.33     | XX                        |
| In-ComunSp        | 2            | 1870.5      | XX                        |

|              |   |         |    |
|--------------|---|---------|----|
| Con-GMJJa    | 3 | 1917.67 | XX |
| Can-PearlJa  | 3 | 2399.33 | XX |
| Ac-SVlInd    | 2 | 2416.0  | XX |
| Am-TokTaj    | 3 | 2907.0  | XX |
| Mom-KhaInd   | 3 | 3131.0  | XX |
| Dud-QPMAfg   | 3 | 3561.0  | XX |
| In-TeSp      | 3 | 3573.67 | XX |
| Con-MielChi  | 3 | 3598.67 | XX |
| In-CGBUSA    | 3 | 3705.67 | XX |
| Can-DulUSA   | 3 | 3988.67 | XX |
| Can-TopUSA   | 3 | 4116.0  | XX |
| Can-GyFran   | 2 | 4785.5  | XX |
| Can-VedFran  | 3 | 4857.33 | XX |
| In-RoMochlSp | 3 | 4983.0  | XX |
| Am-KizilUzbe | 3 | 5130.67 | XX |
| Con-FreeCJa  | 3 | 5153.67 | XX |
| Ag-15591Gha  | 3 | 5289.33 | XX |
| In-TeNinvSp2 | 2 | 5579.0  | XX |
| Con-NanChi   | 3 | 5811.33 | XX |
| La-OgenBul   | 3 | 5920.67 | XX |
| Can-SemUSA   | 2 | 5946.0  | XX |
| In-BBredSp   | 3 | 6135.0  | XX |
| Can-EfJa     | 3 | 6267.33 | XX |
| Can-WiUSA    | 3 | 6332.33 | XX |
| Ag-TendSud   | 3 | 6596.0  | XX |
| chate-CarIta | 1 | 6899.0  | XX |
| Can-EanaHun  | 3 | 6951.33 | XX |
| Am-korcaRus  | 3 | 7347.33 | XX |
| La-CascaPor  | 2 | 7636.0  | XX |
| Flex-Co20Ind | 3 | 7701.33 | XX |
| Can-SucrFran | 3 | 8183.0  | XX |
| Ac-G22843Se  | 3 | 8641.33 | XX |
| Ag-CallInd   | 3 | 9081.67 | XX |
| In-TeNinvSp  | 2 | 9333.5  | XX |
| In-LaEscrSp  | 2 | 9480.0  | XX |
| La-ErizoSp   | 3 | 9498.0  | XX |
| Can-PGRFran  | 3 | 9898.33 | XX |
| Can-HBJUSA   | 3 | 10092.3 | XX |
| Can-NOFran   | 2 | 11188.5 | XX |
| Flex-SnakeSA | 3 | 11617.0 | XX |
| Am-AnaFran   | 3 | 12182.0 | XX |
| Am-HassanTur | 3 | 13002.3 | XX |
| In-PsPiñSp   | 3 | 13913.3 | XX |
| Can-GCHUSA   | 3 | 14156.0 | XX |
| Tibish-Ksud  | 3 | 14223.0 | XX |
| Flex-AryaInd | 3 | 14925.7 | XX |
| Am-KafEgy    | 2 | 15485.0 | XX |
| Mom-MRlInd   | 3 | 15560.7 | XX |
| Am-NesviGeor | 3 | 16829.0 | XX |
| Can-Ogen2Is  | 3 | 17125.7 | XX |
| La-ZatIta    | 3 | 17132.3 | XX |
| Ag-WChInd    | 3 | 17327.7 | XX |
| Am-YokIs     | 2 | 25008.5 | XX |
| Can-NCFran   | 2 | 26160.5 | XX |
| In-LaBolasSp | 3 | 27339.7 | XX |
| La-KroFran   | 4 | 30717.3 | X  |
| Con-PauPol   | 3 | 95327.7 | X  |



|          |   |         |   |
|----------|---|---------|---|
| Con-SCKo | 3 | 97456.3 | X |
|----------|---|---------|---|

#### LSD analysis for BCAA.1 per accessions

Method: 95.0 percentage LSD

| <i>accessions</i> | <i>Cases</i> | <i>Mean</i> | <i>Homogeneous groups</i> |
|-------------------|--------------|-------------|---------------------------|
| Con-GMJJa         | 3            | 750.0       | X                         |
| Con-MielChi       | 3            | 750.0       | X                         |
| Con-SCKo          | 3            | 750.0       | X                         |
| Con-NanChi        | 3            | 750.0       | X                         |
| Ac-TGR1551Zimb    | 3            | 750.0       | X                         |
| Can-Ogen2Is       | 3            | 750.0       | X                         |
| In-TDewUSA        | 3            | 750.0       | X                         |
| Flex-AryaInd      | 3            | 750.0       | X                         |
| chate-CarIta      | 1            | 750.0       | XX                        |
| Flex-Co20Ind      | 3            | 750.0       | X                         |
| Con-ShiroJa       | 3            | 750.0       | X                         |
| Flex-SnakeSA      | 3            | 750.0       | X                         |
| In-ComunSp        | 2            | 750.0       | X                         |
| In-CrabPor        | 2            | 750.0       | X                         |
| Ag-TendSud        | 3            | 750.0       | X                         |
| In-RoMoch1Sp      | 3            | 750.0       | X                         |
| Can-EanaHun       | 3            | 750.0       | X                         |
| In-PsPiñSp        | 3            | 750.0       | X                         |
| Ag-15591Gha       | 3            | 750.0       | X                         |
| In-CGBUSA         | 3            | 750.0       | X                         |
| Am-KafEgy         | 2            | 750.0       | X                         |
| Mom-MRIInd        | 3            | 750.0       | X                         |
| Tibish-Ksud       | 3            | 750.0       | X                         |
| Ag-WChInd         | 3            | 750.0       | X                         |
| Am-KizilUzbe      | 3            | 750.0       | X                         |
| In-HoneyDewUSA    | 3            | 750.0       | X                         |
| Con-BaishChi      | 3            | 750.0       | X                         |
| Am-TokTaj         | 3            | 750.0       | X                         |
| In-TeNinvSp       | 2            | 750.0       | X                         |
| Ac-SVIIInd        | 2            | 750.0       | X                         |
| Am-YokIs          | 2            | 750.0       | X                         |
| Ac-G22843Se       | 3            | 750.0       | X                         |
| Mom-PII24Ind      | 3            | 750.0       | X                         |
| Con-FreeCJa       | 3            | 750.0       | X                         |
| Ac-SRKSLan        | 3            | 1003.0      | X                         |
| In-BBredSp        | 3            | 1296.67     | X                         |
| Can-DulUSA        | 3            | 1336.67     | X                         |
| Can-WiUSA         | 3            | 1551.67     | X                         |
| Con-PauPol        | 3            | 1600.67     | X                         |
| In-BBescrSp       | 3            | 1644.0      | X                         |
| In-AmAoroSp       | 2            | 2021.5      | X                         |
| Can-EfJa          | 3            | 3018.67     | X                         |
| Dud-QPMAfg        | 3            | 3092.67     | X                         |
| In-TeNinvSp2      | 2            | 3404.5      | XX                        |
| In-LaBolasSp      | 3            | 4061.33     | X                         |
| In-AmCañSp        | 3            | 4135.33     | X                         |
| Can-PearlJa       | 3            | 4855.67     | X                         |
| In-LaEscrSp       | 2            | 5597.0      | XX                        |
| Can-TopUSA        | 3            | 6475.33     | X                         |
| Dud-QAPMGeorg     | 3            | 8039.67     | XX                        |
| In-TeSp           | 3            | 8807.67     | XX                        |

|              |   |         |      |
|--------------|---|---------|------|
| Ag-CallInd   | 3 | 9008.67 | XX   |
| Am-NesviGeor | 3 | 9277.33 | XX   |
| La-ErizoSp   | 3 | 9355.0  | XX   |
| Can-SemUSA   | 2 | 11949.0 | XX   |
| La-OgenBul   | 3 | 12646.3 | XX   |
| Can-NCFran   | 2 | 13988.5 | XX   |
| Can-HBJUSA   | 3 | 14376.7 | XX   |
| Can-NOFran   | 2 | 14681.5 | XX   |
| Chi-VellInd  | 3 | 15347.3 | XX   |
| Am-korcaRus  | 3 | 18600.0 | XX   |
| Mom-KhaInd   | 3 | 20000.3 | XX   |
| Am-HassanTur | 3 | 27836.0 | XXX  |
| Can-SucrFran | 3 | 35891.3 | XXXX |
| La-ZatIta    | 3 | 43113.7 | XXX  |
| La-KroFran   | 4 | 54241.0 | XX   |
| Can-VedFran  | 3 | 66279.0 | XX   |
| Can-PGRFran  | 3 | 98380.3 | XX   |
| Can-GCHUSA   | 3 | 111151. | X    |
| La-CascaPor  | 2 | 113766. | X    |
| Am-AnaFran   | 3 | 128667. | X    |
| Can-GyFran   | 2 | 225368. | X    |

#### LSD analysis for BCAA.2 per accessions

Method: 95.0 percentage LSD

| <i>accessions</i> | <i>Cases</i> | <i>Mean</i> | <i>Homogeneous groups</i> |
|-------------------|--------------|-------------|---------------------------|
| Can-EanaHun       | 3            | 750.0       | X                         |
| Ac-SRKSLan        | 3            | 750.0       | X                         |
| Mom-MRIInd        | 3            | 750.0       | X                         |
| chate-CarIta      | 1            | 750.0       | XX                        |
| Can-Ogen2Is       | 3            | 750.0       | X                         |
| In-TDewUSA        | 3            | 750.0       | X                         |
| In-BBescrSp       | 3            | 750.0       | X                         |
| Ac-G22843Se       | 3            | 750.0       | X                         |
| Am-KizilUzbe      | 3            | 750.0       | X                         |
| In-HoneyDewUSA    | 3            | 750.0       | X                         |
| Can-DulUSA        | 3            | 750.0       | X                         |
| In-CrabPor        | 2            | 750.0       | XX                        |
| In-RoMoch1Sp      | 3            | 750.0       | X                         |
| In-TeNinvSp       | 2            | 750.0       | XX                        |
| Flex-Co20Ind      | 3            | 750.0       | X                         |
| In-PsPiñSp        | 3            | 750.0       | X                         |
| Ag-TendSud        | 3            | 750.0       | X                         |
| Mom-PII24Ind      | 3            | 750.0       | X                         |
| Dud-QPMAfg        | 3            | 1214.0      | X                         |
| In-BBredSp        | 3            | 1273.0      | X                         |
| In-CGBUSA         | 3            | 1301.33     | X                         |
| Ac-SVIInd         | 2            | 1456.0      | XX                        |
| Can-WiUSA         | 3            | 1536.67     | X                         |
| Can-PearlJa       | 3            | 1551.67     | X                         |
| Con-NanChi        | 3            | 1584.33     | X                         |
| Con-SCKo          | 3            | 1646.0      | X                         |
| In-AmAoroSp       | 2            | 1703.0      | XX                        |
| Con-BaishChi      | 3            | 1923.33     | X                         |
| Am-YokIs          | 2            | 2021.0      | XX                        |
| Ag-WChInd         | 3            | 2075.67     | X                         |
| Ag-15591Gha       | 3            | 2184.0      | X                         |

|                |   |         |     |
|----------------|---|---------|-----|
| Am-KafEgy      | 2 | 2284.5  | XX  |
| In-TeNinvSp2   | 2 | 2286.0  | XX  |
| In-LaEscrSp    | 2 | 2475.0  | XX  |
| Con-MielChi    | 3 | 2668.33 | X   |
| Con-GMJJa      | 3 | 3058.67 | X   |
| Flex-SnakeSA   | 3 | 3473.67 | X   |
| Can-TopUSA     | 3 | 3600.33 | X   |
| Flex-AryaInd   | 3 | 3770.0  | X   |
| Con-PauPol     | 3 | 4797.0  | X   |
| Am-TokTaj      | 3 | 4829.0  | X   |
| Dud-QAPMGeorg  | 3 | 5384.67 | X   |
| Can-EfJa       | 3 | 5569.33 | XX  |
| Can-HBJUSA     | 3 | 5985.67 | XX  |
| In-TeSp        | 3 | 6757.33 | XX  |
| Tibish-Ksud    | 3 | 7303.67 | XX  |
| In-AmCañSp     | 3 | 7603.0  | XX  |
| Can-SemUSA     | 2 | 7756.0  | XX  |
| In-ComunSp     | 2 | 8250.0  | XX  |
| Con-ShiroJa    | 3 | 8554.67 | XX  |
| Can-NCFran     | 2 | 8837.5  | XX  |
| In-LaBolasSp   | 3 | 9623.67 | XX  |
| Chi-VellInd    | 3 | 10851.3 | XX  |
| Con-FreeCJa    | 3 | 11578.0 | XX  |
| La-ErizoSp     | 3 | 12749.0 | XX  |
| Ac-TGR1551Zimb | 3 | 15717.3 | XX  |
| La-OgenBul     | 3 | 20379.3 | XX  |
| Am-korcaRus    | 3 | 27172.3 | XX  |
| Mom-KhaInd     | 3 | 27305.7 | XX  |
| Can-NOFran     | 2 | 30461.0 | XX  |
| Am-NesviGeor   | 3 | 32155.3 | XX  |
| Can-SucrFran   | 3 | 34721.3 | XX  |
| La-ZatIta      | 3 | 35571.3 | XX  |
| Am-HassanTur   | 3 | 37387.3 | XX  |
| Ag-CallInd     | 3 | 46412.0 | XXX |
| La-KroFran     | 4 | 49836.5 | XX  |
| La-CascaPor    | 2 | 95644.0 | XX  |
| Can-GCHUSA     | 3 | 107881. | X   |
| Can-VedFran    | 3 | 133491. | XX  |
| Am-AnaFran     | 3 | 160794. | X   |
| Can-PGRFran    | 3 | 227270. | X   |
| Can-GyFran     | 2 | 439895. | X   |

#### LSD analysis for BCAA.3 per accessions

Method: 95.0 percentage LSD

| <i>accessions</i> | <i>Cases</i> | <i>Mean</i> | <i>Homogeneous groups</i> |
|-------------------|--------------|-------------|---------------------------|
| Flex-SnakeSA      | 3            | 750.0       | X                         |
| In-BBredSp        | 3            | 750.0       | X                         |
| In-BBescrSp       | 3            | 750.0       | X                         |
| In-AmAoroSp       | 2            | 750.0       | X                         |
| In-CrabPor        | 2            | 750.0       | X                         |
| In-CGBUSA         | 3            | 750.0       | X                         |
| In-TeNinvSp       | 2            | 750.0       | X                         |
| In-LaEscrSp       | 2            | 750.0       | X                         |
| Am-KizilUzbe      | 3            | 750.0       | X                         |
| Can-PearlJa       | 3            | 750.0       | X                         |
| In-HoneyDewUSA    | 3            | 750.0       | X                         |

|                |   |         |      |
|----------------|---|---------|------|
| In-TDewUSA     | 3 | 750.0   | X    |
| In-ComunSp     | 2 | 750.0   | X    |
| Mom-PII24Ind   | 3 | 750.0   | X    |
| Ag-TendSud     | 3 | 750.0   | X    |
| Ag-WChInd      | 3 | 750.0   | X    |
| Ac-TGR1551Zimb | 3 | 750.0   | X    |
| In-RoMoch1Sp   | 3 | 750.0   | X    |
| Am-YokIs       | 2 | 750.0   | X    |
| Tibish-Ksud    | 3 | 750.0   | X    |
| In-PsPiñSp     | 3 | 750.0   | X    |
| Am-KafEgy      | 2 | 750.0   | X    |
| Mom-MR1Ind     | 3 | 750.0   | X    |
| Can-Ogen2Is    | 3 | 750.0   | X    |
| Ac-G22843Se    | 3 | 750.0   | X    |
| In-TeNinvSp2   | 2 | 750.0   | X    |
| Ac-SVIInd      | 2 | 750.0   | X    |
| Am-TokTaj      | 3 | 750.0   | X    |
| Can-TopUSA     | 3 | 750.0   | X    |
| chate-CarIta   | 1 | 750.0   | XX   |
| Con-BaishChi   | 3 | 750.0   | X    |
| Can-WiUSA      | 3 | 750.0   | X    |
| Can-DulUSA     | 3 | 750.0   | X    |
| Con-FreeCJa    | 3 | 750.0   | X    |
| Con-GMJJa      | 3 | 750.0   | X    |
| Con-MielChi    | 3 | 750.0   | X    |
| Con-NanChi     | 3 | 750.0   | X    |
| Con-PauPol     | 3 | 750.0   | X    |
| Con-SCKo       | 3 | 750.0   | X    |
| Con-ShiroJa    | 3 | 750.0   | X    |
| Ac-SRKSLan     | 3 | 750.0   | X    |
| Dud-QPMAfg     | 3 | 750.0   | X    |
| Can-HBJUSA     | 3 | 750.0   | X    |
| Flex-Co20Ind   | 3 | 750.0   | X    |
| Ag-15591Gha    | 3 | 1184.67 | X    |
| Flex-AryaInd   | 3 | 2394.33 | X    |
| Can-EfJa       | 3 | 3250.0  | X    |
| Can-NCFran     | 2 | 3307.0  | X    |
| Can-SemUSA     | 2 | 3646.5  | X    |
| In-TeSp        | 3 | 3723.0  | X    |
| In-AmCañSp     | 3 | 4005.33 | X    |
| In-LaBolasSp   | 3 | 5536.0  | X    |
| Chi-VellInd    | 3 | 5708.67 | X    |
| Can-EanaHun    | 3 | 6055.0  | X    |
| Dud-QAPMGeorg  | 3 | 6936.33 | X    |
| La-ErizoSp     | 3 | 8061.33 | X    |
| La-OgenBul     | 3 | 10577.3 | X    |
| Ag-CallInd     | 3 | 21875.7 | XX   |
| Am-korcaRus    | 3 | 23943.3 | XX   |
| Am-NesviGeor   | 3 | 26586.7 | XXX  |
| Am-HassanTur   | 3 | 41099.7 | XXX  |
| La-ZatIta      | 3 | 45391.7 | XXXX |
| La-KroFran     | 4 | 63405.5 | XXXX |
| Mom-KhaInd     | 3 | 68244.0 | XXXX |
| Can-NOFran     | 2 | 82006.0 | XXXX |
| Can-PGRFran    | 3 | 94583.0 | XXX  |
| Can-GCHUSA     | 3 | 95003.3 | XXX  |
| Can-VedFran    | 3 | 105064. | XXX  |

|              |   |         |    |
|--------------|---|---------|----|
| Can-SucrFran | 3 | 124175. | XX |
| Am-AnaFran   | 3 | 150724. | X  |
| La-CascaPor  | 2 | 258929. | X  |
| Can-GyFran   | 2 | 285159. | X  |

#### LSD analysis for BCAA.4 per accessions

Method: 95.0 percentage LSD

| <i>accessions</i> | <i>Cases</i> | <i>Mean</i> | <i>Homogeneous groups</i> |
|-------------------|--------------|-------------|---------------------------|
| Con-BaishChi      | 3            | 1804.33     | X                         |
| Chi-VellInd       | 3            | 1842.0      | X                         |
| In-BBescrSp       | 3            | 1867.0      | X                         |
| Con-GMJJa         | 3            | 3235.67     | X                         |
| Con-MielChi       | 3            | 3293.0      | X                         |
| Con-SCKo          | 3            | 3295.67     | X                         |
| Ag-CallInd        | 3            | 3488.0      | X                         |
| In-TeNinvSp2      | 2            | 3705.0      | XXX                       |
| Con-ShiroJa       | 3            | 3966.67     | X                         |
| Mom-PII24Ind      | 3            | 4093.67     | X                         |
| Ac-G22843Se       | 3            | 4122.33     | X                         |
| Dud-QAPMGeorg     | 3            | 4126.33     | X                         |
| In-RoMoch1Sp      | 3            | 4180.33     | X                         |
| Con-NanChi        | 3            | 4192.67     | X                         |
| Can-PearlJa       | 3            | 4195.67     | X                         |
| In-HoneyDewUSA    | 3            | 4456.0      | X                         |
| Can-HBJUSA        | 3            | 4508.67     | X                         |
| In-CrabPor        | 2            | 4631.5      | XXX                       |
| Ac-SVIIInd        | 2            | 4680.5      | XXX                       |
| Can-Ogen2Is       | 3            | 4764.0      | X                         |
| Ac-SRKSLan        | 3            | 4801.67     | X                         |
| In-CGBUSA         | 3            | 4862.33     | X                         |
| Ac-TGR1551Zimb    | 3            | 4903.0      | X                         |
| chate-Carlta      | 1            | 4908.0      | XXXXX                     |
| Ag-WChInd         | 3            | 5067.67     | X                         |
| In-AmCañSp        | 3            | 5172.33     | X                         |
| In-BBredSp        | 3            | 5216.33     | X                         |
| Tibish-Ksud       | 3            | 5355.33     | X                         |
| La-ErizoSp        | 3            | 5360.33     | X                         |
| In-PsPiñSp        | 3            | 5404.0      | X                         |
| Can-DulUSA        | 3            | 5706.67     | XX                        |
| In-TDewUSA        | 3            | 5876.0      | XX                        |
| Can-EfJa          | 3            | 5885.33     | XX                        |
| La-OgenBul        | 3            | 5974.0      | XX                        |
| Con-FreeCJa       | 3            | 6020.33     | XX                        |
| Can-NCFran        | 2            | 6098.5      | XXX                       |
| In-AmAoroSp       | 2            | 6298.5      | XXX                       |
| In-LaEscrSp       | 2            | 6368.5      | XXX                       |
| Dud-QPMAfg        | 3            | 6954.0      | XX                        |
| In-TeNinvSp       | 2            | 6956.0      | XXX                       |
| Ag-15591Gha       | 3            | 7062.0      | XXX                       |
| Can-TopUSA        | 3            | 7357.67     | XXX                       |
| Flex-Co20Ind      | 3            | 7782.33     | XXX                       |
| Ag-TendSud        | 3            | 8207.33     | XXX                       |
| In-LaBolasSp      | 3            | 9335.33     | XXX                       |
| Can-SemUSA        | 2            | 9649.5      | XXXXX                     |
| Am-AnaFran        | 3            | 10141.3     | XXX                       |
| Con-PauPol        | 3            | 10440.0     | XXX                       |

|              |   |         |          |
|--------------|---|---------|----------|
| In-TeSp      | 3 | 12033.7 | XXX      |
| Am-TokTaj    | 3 | 13656.0 | XXXX     |
| Am-KafEgy    | 2 | 15116.0 | XXXX     |
| Can-PGRFran  | 3 | 15715.0 | XXXX     |
| Can-SucrFran | 3 | 16598.7 | XXXX     |
| Flex-SnakeSA | 3 | 16863.0 | XXXX     |
| Can-EanaHun  | 3 | 18790.3 | XXXX     |
| Can-GCHUSA   | 3 | 20883.0 | XXXX     |
| Can-VedFran  | 3 | 20994.7 | XXXX     |
| Am-KizilUzbe | 3 | 21192.7 | XXXX     |
| Am-korcaRus  | 3 | 30185.3 | XXXXXX   |
| Can-WiUSA    | 3 | 32333.7 | XXXXXX   |
| In-ComunSp   | 2 | 33903.0 | XXXXXX   |
| Am-NesviGeor | 3 | 35939.0 | XXXXXX   |
| Can-GyFran   | 2 | 45051.5 | XXXXXXXX |
| Mom-KhaInd   | 3 | 46955.7 | XXXXXXXX |
| Mom-MR1Ind   | 3 | 48396.3 | XXXXXX   |
| La-KroFran   | 4 | 51589.5 | XXXX     |
| Can-NOFran   | 2 | 67551.0 | XXX      |
| La-ZatIta    | 3 | 71007.0 | XXX      |
| Am-YokIs     | 2 | 72096.0 | XXX      |
| Flex-AryaInd | 3 | 80182.3 | XX       |
| La-CascaPor  | 2 | 82804.0 | XX       |
| Am-HassanTur | 3 | 86360.7 | X        |

#### LSD analysis for BCAA.5 per accessions

Method: 95.0 percentage LSD

| <i>accessions</i> | <i>Cases</i> | <i>Mean</i> | <i>Homogeneous groups</i> |
|-------------------|--------------|-------------|---------------------------|
| Dud-QPMAfg        | 3            | 750.0       | XX                        |
| Am-HassanTur      | 3            | 750.0       | XX                        |
| Tibish-Ksud       | 3            | 750.0       | XX                        |
| Ac-TGR1551Zimb    | 3            | 750.0       | XX                        |
| Am-NesviGeor      | 3            | 750.0       | XX                        |
| chate-CarIta      | 1            | 750.0       | XXXXXXXXXXXX              |
| Am-YokIs          | 2            | 750.0       | XXXXXX                    |
| Flex-SnakeSA      | 3            | 750.0       | XX                        |
| Can-NCFran        | 2            | 750.0       | XXXXXX                    |
| Con-SCKo          | 3            | 750.0       | XX                        |
| Ac-SRKSLan        | 3            | 750.0       | XX                        |
| Con-ShiroJa       | 3            | 750.0       | XX                        |
| In-HoneyDewUSA    | 3            | 750.0       | XX                        |
| Con-NanChi        | 3            | 750.0       | XX                        |
| In-RoMoch1Sp      | 3            | 750.0       | XX                        |
| Con-PauPol        | 3            | 750.0       | XX                        |
| Can-EanaHun       | 3            | 750.0       | XX                        |
| La-KroFran        | 4            | 750.0       | X                         |
| Con-FreeCJa       | 3            | 750.0       | XX                        |
| Can-SucrFran      | 3            | 750.0       | XX                        |
| Ac-SV1Ind         | 2            | 750.0       | XXXXXX                    |
| Can-SemUSA        | 2            | 750.0       | XXXXXX                    |
| Flex-Co20Ind      | 3            | 750.0       | XX                        |
| In-BBredSp        | 3            | 750.0       | XX                        |
| In-PsPiñSp        | 3            | 1375.0      | XX                        |
| In-TeNinvSp       | 2            | 1626.5      | XXXXXX                    |
| Con-MielChi       | 3            | 1631.0      | XX                        |
| Ag-WChInd         | 3            | 1810.67     | XXX                       |

|               |   |         |            |
|---------------|---|---------|------------|
| Con-GMJa      | 3 | 1852.67 | XXX        |
| In-BBescrSp   | 3 | 1978.0  | XXX        |
| In-AmAoroSp   | 2 | 2327.0  | XXXXXXX X  |
| Chi-VellInd   | 3 | 3289.67 | XXXX       |
| In-ComunSp    | 2 | 3500.0  | XXXXXXXX X |
| Con-BaishChi  | 3 | 3538.67 | XXXX       |
| Dud-QAPMGeorg | 3 | 4266.67 | XXXX       |
| In-CGBUSA     | 3 | 4274.0  | XXXX       |
| In-CrabPor    | 2 | 4469.0  | XXXXXXXX X |
| La-ZatlIta    | 3 | 4909.33 | XXXX       |
| Mom-KhaInd    | 3 | 5560.67 | XXXXX      |
| Can-Ogen2Is   | 3 | 6500.67 | XXXXX      |
| La-CascaPor   | 2 | 6626.5  | XXXXXXXXXX |
| Am-KizilUzbe  | 3 | 6687.67 | XXXXX      |
| Ac-G22843Se   | 3 | 8499.67 | XXXXXXX X  |
| Am-TokTaj     | 3 | 9725.0  | XXXXXXXX X |
| Can-WiUSA     | 3 | 10581.7 | XXXXXXXX X |
| Am-AnaFran    | 3 | 12924.3 | XXXXXXXXXX |
| In-AmCañSp    | 3 | 13703.7 | XXXXXXXXXX |
| Am-korcaRus   | 3 | 16550.7 | XXXXXXXXXX |
| Can-TopUSA    | 3 | 17314.7 | XXXXXXXXXX |
| Mom-MR1Ind    | 3 | 19585.7 | XXXXXXXXXX |
| La-OgenBul    | 3 | 23973.0 | XXXXXXXXXX |
| Can-DulUSA    | 3 | 30121.7 | XXXXXXXXXX |
| Can-NOFran    | 2 | 31190.5 | XXXXXXXXXX |
| Can-HBJUSA    | 3 | 32253.3 | XXXXXXXXXX |
| Can-GCHUSA    | 3 | 32822.7 | XXXXXXXXXX |
| Can-GyFran    | 2 | 33926.0 | XXXXXXXXXX |
| Can-PGRFran   | 3 | 35642.7 | XXXXXXXXXX |
| Can-EfJa      | 3 | 41489.0 | XXXXXXXXXX |
| Ag-TendSud    | 3 | 47842.0 | XXXXXXXXXX |
| La-ErizoSp    | 3 | 49749.3 | XXXXXXXXXX |
| In-TeSp       | 3 | 53891.7 | XXXXXXXXXX |
| Can-VedFran   | 3 | 55046.7 | XXXXXXXXXX |
| Can-PearlJa   | 3 | 57571.3 | XXXXXXXXXX |
| Flex-AryaInd  | 3 | 59316.3 | XXXXXXXX   |
| Ag-CallInd    | 3 | 61096.7 | XX XXX     |
| In-LaBolasSp  | 3 | 64320.0 | X XXX      |
| In-TeNinvSp2  | 2 | 65847.0 | XXXXXX     |
| In-LaEscrSp   | 2 | 71632.5 | XXX        |
| Mom-PII24Ind  | 3 | 75388.0 | XX         |
| In-TDewUSA    | 3 | 78937.7 | X          |
| Am-KafEgy     | 2 | 82347.0 | X          |
| Ag-15591Gha   | 3 | 178319. | X          |

#### LSD analysis for LD.1 per accessions

Method: 95.0 percentage LSD

| <i>accessions</i> | <i>Cases</i> | <i>Mean</i> | <i>Homogeneous groups</i> |
|-------------------|--------------|-------------|---------------------------|
| Can-NOFran        | 2            | 750.0       | XX                        |
| Con-GMJa          | 3            | 750.0       | X                         |
| La-CascaPor       | 2            | 2314.5      | XX                        |
| In-ComunSp        | 2            | 2419.5      | XX                        |
| Mom-PII24Ind      | 3            | 2490.0      | XX                        |
| Am-YokIs          | 2            | 2632.0      | XX                        |
| Can-DulUSA        | 3            | 3261.33     | XX                        |
| Can-VedFran       | 3            | 3840.33     | XX                        |

|                |   |         |            |
|----------------|---|---------|------------|
| Can-SucrFran   | 3 | 3962.67 | XX         |
| Ac-SVInd       | 2 | 5407.5  | XXX        |
| Can-TopUSA     | 3 | 5651.67 | XX         |
| Con-ShiroJa    | 3 | 5712.67 | XX         |
| Am-HassanTur   | 3 | 6224.33 | XX         |
| Con-BaishChi   | 3 | 6310.33 | XX         |
| Con-MielChi    | 3 | 6440.67 | XX         |
| Ac-TGR1551Zimb | 3 | 6543.67 | XX         |
| Can-PGRFran    | 3 | 7689.0  | XX         |
| Can-EfJa       | 3 | 7718.67 | XX         |
| In-TeNinvSp2   | 2 | 8039.5  | XXX        |
| Am-KizilUzbe   | 3 | 8169.33 | XX         |
| Can-WiUSA      | 3 | 8912.33 | XX         |
| Chi-VellInd    | 3 | 9112.67 | XX         |
| Am-AnaFran     | 3 | 9904.67 | XXX        |
| Am-TokTaj      | 3 | 9929.67 | XXX        |
| Con-SCKo       | 3 | 10036.0 | XXX        |
| Can-GyFran     | 2 | 10208.0 | XXX        |
| Mom-KhaInd     | 3 | 10256.7 | XXX        |
| Dud-QAPMGeorg  | 3 | 10695.3 | XXX        |
| Can-GCHUSA     | 3 | 11508.0 | XXX        |
| La-ZatIta      | 3 | 12741.7 | XXX        |
| Can-SemUSA     | 2 | 13600.5 | XXXXXX     |
| La-OgenBul     | 3 | 13969.3 | XXX        |
| Ac-SRKSLan     | 3 | 14290.0 | XXX        |
| Am-korcaRus    | 3 | 14463.7 | XXX        |
| Am-NesviGeor   | 3 | 15431.3 | XXX        |
| In-RoMoch1Sp   | 3 | 15432.3 | XXX        |
| Con-NanChi     | 3 | 16749.0 | XXX        |
| La-ErizoSp     | 3 | 17734.0 | XXXX       |
| In-BBescrSp    | 3 | 18952.3 | XXXXXX     |
| In-TeSp        | 3 | 19253.3 | XXXXXX     |
| Mom-MR1Ind     | 3 | 19822.0 | XXXXXX     |
| Can-Ogen2Is    | 3 | 19980.7 | XXXXXX     |
| Can-HBJUSA     | 3 | 21164.0 | XXXXXXX    |
| Can-EanaHun    | 3 | 21351.3 | XXXXXXX    |
| In-TeNinvSp    | 2 | 23719.0 | XXXXXXXX   |
| In-LaBolasSp   | 3 | 24732.0 | XXXXXXXX   |
| Dud-QPMAfg     | 3 | 25399.7 | XXXXXXXX   |
| chate-Carlta   | 1 | 25669.0 | XXXXXXXXXX |
| Flex-AryaInd   | 3 | 27909.0 | XXXXXX     |
| Can-PearlJa    | 3 | 28854.3 | XXXXXX     |
| Am-KafEgy      | 2 | 28967.5 | XXXXXXXXXX |
| In-AmCañSp     | 3 | 31196.0 | XXXXXXXXXX |
| In-PsPiñSp     | 3 | 32344.3 | XXXXXXXXXX |
| In-LaEscrSp    | 2 | 36074.0 | XXXXXXXXXX |
| Flex-Co20Ind   | 3 | 37114.0 | XXXXXXXXXX |
| In-HoneyDewUSA | 3 | 37788.7 | XXXXXXXXXX |
| La-KroFran     | 4 | 38698.5 | XXXXXXXXXX |
| In-AmAoroSp    | 2 | 39870.0 | XXXXXXXXXX |
| In-CrabPor     | 2 | 39942.0 | XXXXXXXXXX |
| Flex-SnakeSA   | 3 | 41066.7 | XXXXXXXXXX |
| Ac-G22843Se    | 3 | 47368.3 | XXXXXXXXXX |
| Con-FreeCJa    | 3 | 48124.0 | XXXXXXXXXX |
| Ag-15591Gha    | 3 | 48899.7 | XXXXXXXXXX |
| In-BBredSp     | 3 | 56589.7 | XXXXXXX    |
| Tibish-Ksud    | 3 | 64008.0 | XXXXXXX    |



|            |   |         |        |
|------------|---|---------|--------|
| Con-PauPol | 3 | 65471.0 | XXXXXX |
| Can-NCFran | 2 | 73257.0 | XXXXXX |
| Ag-CallInd | 3 | 76173.7 | XXXXXX |
| Ag-TendSud | 3 | 76745.7 | XXXX   |
| In-CGBUSA  | 3 | 86020.0 | XXX    |
| Ag-WChInd  | 3 | 105867. | XX     |
| In-TDewUSA | 3 | 121430. | X      |

#### LSD analysis for LD.2 per accessions

Method: 95.0 percentage LSD

| <i>accessions</i> | <i>Cases</i> | <i>Mean</i> | <i>Homogeneous groups</i> |
|-------------------|--------------|-------------|---------------------------|
| Can-DulUSA        | 3            | 16306.7     | X                         |
| La-CascaPor       | 2            | 17406.5     | XX                        |
| Can-SucrFran      | 3            | 22383.7     | XX                        |
| Am-AnaFran        | 3            | 23736.3     | XX                        |
| In-ComunSp        | 2            | 24552.5     | XXX                       |
| Can-VedFran       | 3            | 25991.0     | XX                        |
| La-KroFran        | 4            | 26511.3     | XX                        |
| Can-NOFran        | 2            | 26767.0     | XXXX                      |
| Can-GCHUSA        | 3            | 27487.0     | XX                        |
| Can-GyFran        | 2            | 29446.5     | XXXXXX                    |
| Mom-MR1Ind        | 3            | 31254.3     | XXXX                      |
| Can-PGRFran       | 3            | 31873.3     | XXXX                      |
| Can-WiUSA         | 3            | 32400.3     | XXXXXX                    |
| Can-TopUSA        | 3            | 33310.0     | XXXXXX                    |
| Am-HassanTur      | 3            | 36823.7     | XXXXXXXX                  |
| Can-EfJa          | 3            | 38462.7     | XXXXXXXXXX                |
| Am-NesviGeor      | 3            | 38567.0     | XXXXXXXXXX                |
| Am-YokIs          | 2            | 40453.5     | XXXXXXXXXXXX              |
| Can-Ogen2Is       | 3            | 40624.7     | XXXXXXXXXXXX              |
| La-OgenBul        | 3            | 40878.7     | XXXXXXXXXXXX              |
| In-LaBolasSp      | 3            | 41811.0     | XXXXXXXXXXXX              |
| Am-korcaRus       | 3            | 43173.7     | XXXXXXXXXXXX              |
| In-TeSp           | 3            | 45123.7     | XXXXXXXXXXXX              |
| La-ErizoSp        | 3            | 45709.3     | XXXXXXXXXXXX              |
| La-ZatIta         | 3            | 47573.7     | XXXXXXXXXXXX              |
| Ac-G22843Se       | 3            | 48780.0     | XXXXXXXXXXXX              |
| Mom-PII24Ind      | 3            | 50466.3     | XXXXXXXXXXXX              |
| Can-SemUSA        | 2            | 50471.5     | XXXXXXXXXXXXXXXX          |
| Can-HBJUSA        | 3            | 51525.0     | XXXXXXXXXXXXXXXX          |
| Flex-AryaInd      | 3            | 52095.7     | XXXXXXXXXXXXXXXX          |
| Can-PearlJa       | 3            | 52604.7     | XXXXXXXXXXXXXXXX          |
| Ag-15591Gha       | 3            | 53154.3     | XXXXXXXXXXXXXXXX          |
| Mom-KhaInd        | 3            | 53314.3     | XXXXXXXXXXXXXXXX          |
| Con-BaishChi      | 3            | 54046.0     | XXXXXXXXXXXXXXXX          |
| Con-PauPol        | 3            | 54304.3     | XXXXXXXXXXXXXXXX          |
| Am-TokTaj         | 3            | 54762.3     | XXXXXXXXXXXXXXXX          |
| Dud-QAPMGeorg     | 3            | 54798.0     | XXXXXXXXXXXXXXXX          |
| Con-MielChi       | 3            | 55417.3     | XXXXXXXXXXXXXXXX          |
| Am-KizilUzbe      | 3            | 56944.7     | XXXXXXXXXXXXXXXX          |
| Con-SCKo          | 3            | 57969.0     | XXXXXXXXXXXXXXXX          |
| In-TeNinvSp2      | 2            | 59065.5     | XXXXXXXXXXXXXXXX          |
| Can-EanaHun       | 3            | 61053.7     | XXXXXXXXXXXXXXXX          |
| Ag-TendSud        | 3            | 63123.0     | XXXXXXXXXXXXXXXX          |
| Ag-CallInd        | 3            | 63384.7     | XXXXXXXXXXXXXXXX          |
| In-BBescrSp       | 3            | 63438.7     | XXXXXXXXXXXXXXXX          |

|                |   |         |                  |
|----------------|---|---------|------------------|
| Am-KafEgy      | 2 | 64339.5 | XXXXXXXXXXXXXXXX |
| Flex-SnakeSA   | 3 | 70549.3 | XXXXXXXXXXXXXXXX |
| Chi-VellInd    | 3 | 71434.3 | XXXXXXXXXXXXXXXX |
| Con-GMJJa      | 3 | 71521.3 | XXXXXXXXXXXXXXXX |
| In-BBredSp     | 3 | 71984.7 | XXXXXXXXXXXXXXXX |
| Flex-Co20Ind   | 3 | 73424.0 | XXXXXXXXXXXXXXXX |
| In-TDewUSA     | 3 | 73464.0 | XXXXXXXXXXXXXXXX |
| In-CGBUSA      | 3 | 73776.7 | XXXXXXXXXXXXXXXX |
| In-RoMoch1Sp   | 3 | 74416.0 | XXXXXXXXXXXXXXXX |
| Dud-QPMAfg     | 3 | 74543.3 | XXXXXXXXXXXXXXXX |
| Con-FreeCJa    | 3 | 76770.7 | XXXXXXXXXXXX     |
| Con-ShiroJa    | 3 | 78599.0 | XXXXXXXXXXXX     |
| Tibish-Ksud    | 3 | 79390.3 | XXXXXXXXXXXX     |
| Con-NanChi     | 3 | 81347.0 | XXXXXXXXXXXX     |
| Ag-WChInd      | 3 | 81449.0 | XXXXXXXXXXXX     |
| In-HoneyDewUSA | 3 | 82460.0 | XXXXXXXXXXXX     |
| In-AmCañSp     | 3 | 83211.3 | XXXXXXXXXXXX     |
| In-LaEscrSp    | 2 | 85053.5 | XXXXXXXXXXXX     |
| Ac-SRKSLan     | 3 | 87538.3 | XXXXXXXXXXXX     |
| In-PsPiñSp     | 3 | 88963.7 | XXXXXXXXXXXX     |
| chate-Carlta   | 1 | 92126.0 | XXXXXXXXXXXX     |

Ac-TGR1551Zimb 3 92256.7 **LSD analysis for LD.2 per accessions**

Method: 95.0 percentage LSD

|             |   |         |        |
|-------------|---|---------|--------|
| XXXX        |   |         |        |
| In-CrabPor  | 2 | 96539.0 | XXXXXX |
| Can-NCFran  | 2 | 97403.0 | XXXXXX |
| In-TeNinvSp | 2 | 99231.5 | XXXXXX |
| Ac-SVIlInd  | 2 | 104384. | XXXXXX |
| In-AmAoroSp | 2 | 107681. | XXXXXX |

**LSD analysis for LD.2 per accessions**

Method: 95.0 percentage LSD

| <i>accessions</i> | <i>Cases</i> | <i>Mean</i> | <i>Homogeneous groups</i> |
|-------------------|--------------|-------------|---------------------------|
| Can-DulUSA        | 3            | 16306.7     | X                         |
| La-CascaPor       | 2            | 17406.5     | XX                        |
| Can-SucrFran      | 3            | 22383.7     | XX                        |
| Am-AnaFran        | 3            | 23736.3     | XX                        |
| In-ComunSp        | 2            | 24552.5     | XXX                       |
| Can-VedFran       | 3            | 25991.0     | XX                        |
| La-KroFran        | 4            | 26511.3     | XX                        |
| Can-NOFran        | 2            | 26767.0     | XXXX                      |
| Can-GCHUSA        | 3            | 27487.0     | XX                        |
| Can-GyFran        | 2            | 29446.5     | XXXXXX                    |
| Mom-MRIInd        | 3            | 31254.3     | XXXX                      |
| Can-PGRFran       | 3            | 31873.3     | XXXX                      |
| Can-WiUSA         | 3            | 32400.3     | XXXXXX                    |
| Can-TopUSA        | 3            | 33310.0     | XXXXXX                    |
| Am-HassanTur      | 3            | 36823.7     | XXXXXX                    |
| Can-EfJa          | 3            | 38462.7     | XXXXXX                    |
| Am-NesviGeor      | 3            | 38567.0     | XXXXXX                    |
| Am-YokIs          | 2            | 40453.5     | XXXXXX                    |
| Can-Ogen2Is       | 3            | 40624.7     | XXXXXX                    |
| La-OgenBul        | 3            | 40878.7     | XXXXXX                    |
| In-LaBolasSp      | 3            | 41811.0     | XXXXXX                    |
| Am-korcaRus       | 3            | 43173.7     | XXXXXX                    |

|                |   |         |            |
|----------------|---|---------|------------|
| In-TeSp        | 3 | 45123.7 | XXXXXXXXXX |
| La-ErizoSp     | 3 | 45709.3 | XXXXXXXXXX |
| La-ZatlIta     | 3 | 47573.7 | XXXXXXXXXX |
| Ac-G22843Se    | 3 | 48780.0 | XXXXXXXXXX |
| Mom-PII24Ind   | 3 | 50466.3 | XXXXXXXXXX |
| Can-SemUSA     | 2 | 50471.5 | XXXXXXXXXX |
| Can-HBJUSA     | 3 | 51525.0 | XXXXXXXXXX |
| Flex-AryaInd   | 3 | 52095.7 | XXXXXXXXXX |
| Can-PearlJa    | 3 | 52604.7 | XXXXXXXXXX |
| Ag-15591Gha    | 3 | 53154.3 | XXXXXXXXXX |
| Mom-KhaInd     | 3 | 53314.3 | XXXXXXXXXX |
| Con-BaishChi   | 3 | 54046.0 | XXXXXXXXXX |
| Con-PauPol     | 3 | 54304.3 | XXXXXXXXXX |
| Am-TokTaj      | 3 | 54762.3 | XXXXXXXXXX |
| Dud-QAPMGeorg  | 3 | 54798.0 | XXXXXXXXXX |
| Con-MielChi    | 3 | 55417.3 | XXXXXXXXXX |
| Am-KizilUzbe   | 3 | 56944.7 | XXXXXXXXXX |
| Con-SCKo       | 3 | 57969.0 | XXXXXXXXXX |
| In-TeNinvSp2   | 2 | 59065.5 | XXXXXXXXXX |
| Can-EanaHun    | 3 | 61053.7 | XXXXXXXXXX |
| Ag-TendSud     | 3 | 63123.0 | XXXXXXXXXX |
| Ag-CallInd     | 3 | 63384.7 | XXXXXXXXXX |
| In-BBescrSp    | 3 | 63438.7 | XXXXXXXXXX |
| Am-KafEgy      | 2 | 64339.5 | XXXXXXXXXX |
| Flex-SnakeSA   | 3 | 70549.3 | XXXXXXXXXX |
| Chi-VellInd    | 3 | 71434.3 | XXXXXXXXXX |
| Con-GMJJa      | 3 | 71521.3 | XXXXXXXXXX |
| In-BBredSp     | 3 | 71984.7 | XXXXXXXXXX |
| Flex-Co20Ind   | 3 | 73424.0 | XXXXXXXXXX |
| In-TDewUSA     | 3 | 73464.0 | XXXXXXXXXX |
| In-CGBUSA      | 3 | 73776.7 | XXXXXXXXXX |
| In-RoMochISp   | 3 | 74416.0 | XXXXXXXXXX |
| Dud-QPMAfg     | 3 | 74543.3 | XXXXXXXXXX |
| Con-FreeCJa    | 3 | 76770.7 | XXXXXXXXXX |
| Con-ShiroJa    | 3 | 78599.0 | XXXXXXXXXX |
| Tibish-Ksud    | 3 | 79390.3 | XXXXXXXXXX |
| Con-NanChi     | 3 | 81347.0 | XXXXXXXXXX |
| Ag-WChInd      | 3 | 81449.0 | XXXXXXXXXX |
| In-HoneyDewUSA | 3 | 82460.0 | XXXXXXXXXX |
| In-AmCañSp     | 3 | 83211.3 | XXXXXXXXXX |
| In-LaEscrSp    | 2 | 85053.5 | XXXXXXXXXX |
| Ac-SRKSLan     | 3 | 87538.3 | XXXXXXX    |
| In-PsPiñSp     | 3 | 88963.7 | XXXXXXX    |
| chate-CarlIta  | 1 | 92126.0 | XXXXXXXXXX |
| Ac-TGR1551Zimb | 3 | 92256.7 | XXXXXX     |
| In-CrabPor     | 2 | 96539.0 | XXXXXX     |
| Can-NCFran     | 2 | 97403.0 | XXXXXX     |
| In-TeNinvSp    | 2 | 99231.5 | XXXXXX     |
| Ac-SVIlInd     | 2 | 104384. | XXXXXX     |
| In-AmAoroSp    | 2 | 107681. | XXXXXX     |

#### LSD analysis for LD.3 per accessions

Method: 95.0 percentage LSD

| <i>accessions</i> | <i>Cases</i> | <i>Mean</i> | <i>Homogeneous groups</i> |
|-------------------|--------------|-------------|---------------------------|
| Am-YokIs          | 2            | 29028.5     | XXX                       |
| Can-VedFran       | 3            | 31465.0     | X                         |

|                |   |         |            |
|----------------|---|---------|------------|
| In-ComunSp     | 2 | 34721.0 | XXX        |
| Con-GMJJa      | 3 | 35017.7 | XX         |
| Can-DulUSA     | 3 | 39979.7 | XX         |
| Can-TopUSA     | 3 | 48607.0 | XXX        |
| La-CascaPor    | 2 | 49106.0 | XXX        |
| Am-KizilUzbe   | 3 | 49294.3 | XXX        |
| Am-AnaFran     | 3 | 54940.0 | XXX        |
| Can-NOFran     | 2 | 56782.5 | XXXXXX     |
| Con-MielChi    | 3 | 58489.0 | XXX        |
| Mom-PII24Ind   | 3 | 60087.7 | XXX        |
| In-RoMoch1Sp   | 3 | 62351.7 | XXX        |
| La-OgenBul     | 3 | 64669.7 | XXX        |
| In-TeNinvSp2   | 2 | 66550.5 | XXXXXX     |
| Am-korcaRus    | 3 | 68719.0 | XXX        |
| Dud-QAPMGeorg  | 3 | 72367.7 | XXX        |
| Can-PGRFran    | 3 | 75855.0 | XXX        |
| Can-SucrFran   | 3 | 75978.7 | XXX        |
| La-ErizoSp     | 3 | 78801.0 | XXX        |
| Can-GCHUSA     | 3 | 80440.0 | XXXXX      |
| Can-EfJa       | 3 | 81248.7 | XXXXX      |
| Can-Ogen2Is    | 3 | 84808.0 | XXXXXX     |
| Am-TokTaj      | 3 | 86061.7 | XXXXXX     |
| Chi-VellInd    | 3 | 86611.3 | XXXXXX     |
| Can-WiUSA      | 3 | 90496.7 | XXXXXX     |
| Ac-SVIIInd     | 2 | 90653.5 | XXXXXXXXX  |
| Can-SemUSA     | 2 | 95041.0 | XXXXXXXXX  |
| Can-GyFran     | 2 | 98783.0 | XXXXXXXXX  |
| Am-NesviGeor   | 3 | 99383.3 | XXXXXXXXX  |
| Con-BaishChi   | 3 | 103889. | XXXXXXXXX  |
| Dud-QPMAfg     | 3 | 113255. | XXXXXXXXX  |
| chate-CarIta   | 1 | 117161. | XXXXXXXXXX |
| Con-ShiroJa    | 3 | 117743. | XXXXXXXXX  |
| Con-SCKo       | 3 | 122779. | XXXXXXXXX  |
| Mom-MR1Ind     | 3 | 127246. | XXXXXXXXX  |
| Mom-KhaInd     | 3 | 130422. | XXXXXXXXX  |
| Can-HBJUSA     | 3 | 130869. | XXXXXXXXX  |
| In-TeNinvSp    | 2 | 135083. | XXXXXXXXXX |
| Flex-SnakeSA   | 3 | 136222. | XXXXXXXXX  |
| Flex-AryaInd   | 3 | 140157. | XXXXXXXXX  |
| Am-HassanTur   | 3 | 143412. | XXXXXXXXX  |
| Con-NanChi     | 3 | 156643. | XXXXXXXXXX |
| Ag-15591Gha    | 3 | 158864. | XXXXXXXXXX |
| In-CGBUSA      | 3 | 159414. | XXXXXXXXXX |
| In-LaBolasSp   | 3 | 162093. | XXXXXXXXXX |
| In-PsPiñSp     | 3 | 163110. | XXXXXXXXXX |
| Ac-TGR1551Zimb | 3 | 163196. | XXXXXXXXXX |
| In-LaEscrSp    | 2 | 167057. | XXXXXXXXXX |
| La-ZatIta      | 3 | 169807. | XXXXXXXXXX |
| Ag-CalInd      | 3 | 189239. | XXXXXXXXXX |
| In-HoneyDewUSA | 3 | 189417. | XXXXXXXXXX |
| Ag-TendSud     | 3 | 200378. | XXXXXXXXXX |
| La-KroFran     | 4 | 205095. | XXXXXXXXXX |
| In-CrabPor     | 2 | 214526. | XXXXXXXXXX |
| In-TeSp        | 3 | 217587. | XXXXXXXXXX |
| In-BBescrSp    | 3 | 219790. | XXXXXXXXXX |
| Ac-SRKSLan     | 3 | 221905. | XXXXXXXXXX |
| In-AmCañSp     | 3 | 227154. | XXXXXXXXXX |

|              |   |         |            |
|--------------|---|---------|------------|
| Ac-G22843Se  | 3 | 234174. | XXXXXXXXXX |
| Can-EanaHun  | 3 | 250304. | XXXXXXXXXX |
| Can-NCFran   | 2 | 256030. | XXXXXXXXXX |
| In-BBredSp   | 3 | 259164. | XXXXXXXXXX |
| Am-KafEgy    | 2 | 274629. | XXXXXXXXXX |
| Can-PearlJa  | 3 | 297007. | XXXXXX     |
| Tibish-Ksud  | 3 | 299765. | XXXXXX     |
| Con-PauPol   | 3 | 316043. | XXXX       |
| In-AmAoroSp  | 2 | 352239. | XXX        |
| In-TDewUSA   | 3 | 368756. | XX         |
| Ag-WChInd    | 3 | 432376. | XX         |
| Con-FreeCJa  | 3 | 606478. | X          |
| Flex-Co20Ind | 3 | 621497. | X          |

#### LSD analysis for LD.5 per accessions

Method: 95.0 percentage LSD

| <i>accessions</i> | <i>Cases</i> | <i>Mean</i> | <i>Homogeneous groups</i> |
|-------------------|--------------|-------------|---------------------------|
| Ac-TGR1551Zimb    | 3            | 772.667     | X                         |
| Con-GMJJa         | 3            | 814.667     | X                         |
| Con-BaishChi      | 3            | 823.0       | X                         |
| Can-PGRFran       | 3            | 828.667     | X                         |
| In-HoneyDewUSA    | 3            | 873.333     | X                         |
| Ag-TendSud        | 3            | 915.667     | X                         |
| Flex-Co20Ind      | 3            | 948.0       | X                         |
| Can-VedFran       | 3            | 948.333     | X                         |
| Can-SucrFran      | 3            | 959.0       | X                         |
| Con-MielChi       | 3            | 963.0       | X                         |
| Con-FreeCJa       | 3            | 979.0       | X                         |
| In-ComunSp        | 2            | 980.0       | XX                        |
| In-CrabPor        | 2            | 991.0       | XX                        |
| Con-ShiroJa       | 3            | 1022.33     | X                         |
| In-AmCañSp        | 3            | 1065.0      | X                         |
| Am-KafEgy         | 2            | 1085.5      | XX                        |
| Dud-QPMAfg        | 3            | 1091.67     | X                         |
| La-ErizoSp        | 3            | 1110.33     | X                         |
| Ac-SRKSLan        | 3            | 1122.67     | X                         |
| Am-NesviGeor      | 3            | 1149.0      | X                         |
| Can-Ogen2Is       | 3            | 1153.67     | X                         |
| Con-SCKo          | 3            | 1155.67     | X                         |
| Mom-PII24Ind      | 3            | 1207.33     | X                         |
| In-TeSp           | 3            | 1209.33     | X                         |
| In-LaBolasSp      | 3            | 1214.33     | X                         |
| Con-NanChi        | 3            | 1218.67     | X                         |
| chate-Carlta      | 1            | 1224.0      | XXXX                      |
| In-AmAoroSp       | 2            | 1230.5      | XX                        |
| Am-HassanTur      | 3            | 1234.0      | X                         |
| In-TeNinvSp2      | 2            | 1240.0      | XX                        |
| Mom-KhaInd        | 3            | 1274.33     | X                         |
| Can-EfJa          | 3            | 1320.33     | X                         |
| Can-NOFran        | 2            | 1348.0      | XX                        |
| Can-HBJUSA        | 3            | 1405.33     | X                         |
| In-LaEscrSp       | 2            | 1437.0      | XXX                       |
| La-OgenBul        | 3            | 1449.0      | X                         |
| In-TeNinvSp       | 2            | 1457.0      | XXX                       |
| Can-WiUSA         | 3            | 1492.0      | X                         |
| Can-EanaHun       | 3            | 1494.0      | X                         |

|               |   |         |        |
|---------------|---|---------|--------|
| Can-DulUSA    | 3 | 1618.67 | X      |
| Am-TokTaj     | 3 | 1699.67 | X      |
| Am-AnaFran    | 3 | 1736.33 | X      |
| Ac-SVIIInd    | 2 | 1752.5  | XXXX   |
| Am-korcaRus   | 3 | 1777.33 | X      |
| La-CascaPor   | 2 | 1816.5  | XXXX   |
| Can-TopUSA    | 3 | 1884.67 | X      |
| Can-SemUSA    | 2 | 2173.5  | XXXX   |
| Can-GyFran    | 2 | 2396.5  | XXXX   |
| Can-GCHUSA    | 3 | 2412.33 | X      |
| Am-YokIs      | 2 | 2577.0  | XXXX   |
| La-ZatIta     | 3 | 2839.33 | XX     |
| Chi-VellInd   | 3 | 3531.33 | XXXX   |
| In-BBescrSp   | 3 | 3948.33 | XXXX   |
| Can-PearlJa   | 3 | 4037.67 | XXXX   |
| In-TDewUSA    | 3 | 5060.0  | XXXX   |
| Dud-QAPMGeorg | 3 | 5560.0  | XXXX   |
| In-BBredSp    | 3 | 5596.33 | XXXX   |
| Am-KizilUzbe  | 3 | 6473.0  | XXXX   |
| Ac-G22843Se   | 3 | 6491.0  | XXXX   |
| Mom-MR1Ind    | 3 | 6602.67 | XXXX   |
| Ag-15591Gha   | 3 | 9994.33 | XXXX   |
| La-KroFran    | 4 | 10022.0 | XXXX   |
| Tibish-Ksud   | 3 | 11825.7 | XXXX   |
| In-PsPiñSp    | 3 | 13395.0 | XXXXXX |
| Con-PauPol    | 3 | 13616.0 | XXXXXX |
| Ag-WChInd     | 3 | 13803.7 | XXXXXX |
| In-RoMoch1Sp  | 3 | 15809.0 | XXXXXX |
| In-CGBUSA     | 3 | 16329.7 | XXXX   |
| Ag-CallInd    | 3 | 16486.0 | XXX    |
| Can-NCFran    | 2 | 18000.5 | XXX    |
| Flex-AryaInd  | 3 | 26252.0 | XX     |
| Flex-SnakeSA  | 3 | 27417.3 | X      |

#### LSD analysis for LD.6 per accessions

Method: 95.0 percentage LSD

| <i>accessions</i> | <i>Cases</i> | <i>Mean</i> | <i>Homogeneous groups</i> |
|-------------------|--------------|-------------|---------------------------|
| Ac-TGR1551Zimb    | 3            | 26321.7     | X                         |
| Con-GMJJa         | 3            | 30630.0     | X                         |
| Ac-SVIIInd        | 2            | 30815.0     | X                         |
| La-CascaPor       | 2            | 36173.5     | XX                        |
| In-RoMoch1Sp      | 3            | 40843.3     | X                         |
| Con-ShiroJa       | 3            | 40888.3     | X                         |
| Am-YokIs          | 2            | 42182.0     | XXX                       |
| La-ZatIta         | 3            | 47545.0     | X                         |
| Can-VedFran       | 3            | 52016.7     | XX                        |
| Am-KizilUzbe      | 3            | 56171.3     | XX                        |
| Can-SucrFran      | 3            | 57086.3     | XX                        |
| In-CGBUSA         | 3            | 58179.7     | XX                        |
| In-PsPiñSp        | 3            | 60063.3     | XXX                       |
| Can-GCHUSA        | 3            | 60743.7     | XXX                       |
| Mom-PII24Ind      | 3            | 65822.3     | XXXX                      |
| Chi-VellInd       | 3            | 66821.7     | XXXX                      |
| Can-DulUSA        | 3            | 70450.7     | XXXX                      |
| Ac-SRKSLan        | 3            | 71805.0     | XXXX                      |
| chate-Carlta      | 1            | 74965.0     | XXXXXXXX                  |

|                |   |         |          |
|----------------|---|---------|----------|
| Con-BaishChi   | 3 | 77727.0 | XXXX X   |
| Flex-SnakeSA   | 3 | 78385.7 | XXXX X   |
| Dud-QPMafg     | 3 | 79799.0 | XXXX X   |
| Tibish-Ksud    | 3 | 80249.7 | XXXX X   |
| Can-EfJa       | 3 | 80446.0 | XXXX X   |
| Am-korcaRus    | 3 | 80882.0 | XXXX X   |
| Mom-MR1Ind     | 3 | 81917.3 | XXXX X   |
| Con-NanChi     | 3 | 85981.3 | XXXX X   |
| In-AmAoroSp    | 2 | 86504.0 | XXXXXX   |
| La-KroFran     | 4 | 88982.0 | XXXX X   |
| Can-NOFran     | 2 | 90838.5 | XXXXXX   |
| Can-TopUSA     | 3 | 92740.0 | XXXXXX   |
| Am-AnaFran     | 3 | 95113.7 | XXXXXX   |
| Can-Ogen2Is    | 3 | 98060.0 | XXXXXX   |
| In-TeNinvSp    | 2 | 103321. | XXXXXX   |
| Can-WiUSA      | 3 | 104387. | XXXXXX   |
| Dud-QAPMGeorg  | 3 | 108754. | XXXXXX   |
| Can-EanaHun    | 3 | 110536. | XXXXXX   |
| In-LaEscrSp    | 2 | 116023. | XXXXXX   |
| In-TeNinvSp2   | 2 | 117003. | XXXXXX   |
| In-AmCañSp     | 3 | 118967. | XXXXXX   |
| La-OgenBul     | 3 | 122092. | XXXXXX   |
| Flex-Co20Ind   | 3 | 124437. | XXXXXX   |
| Can-SemUSA     | 2 | 126846. | XXXXXX   |
| Can-GyFran     | 2 | 134602. | XXXXXX   |
| Mom-KhaInd     | 3 | 135755. | XXXXXX   |
| In-ComunSp     | 2 | 136722. | XXXXXX   |
| Con-MielChi    | 3 | 138482. | XXXXXX   |
| Am-KafEgy      | 2 | 139024. | XXXXXX   |
| In-HoneyDewUSA | 3 | 142337. | XXXXXX   |
| Can-NCFran     | 2 | 143114. | XXXXXX   |
| Am-TokTaj      | 3 | 143188. | XXXXXX   |
| Ag-WChInd      | 3 | 150143. | XXXXXX   |
| Con-FreeCJa    | 3 | 153185. | XXXXXX   |
| Am-NesviGeor   | 3 | 153328. | XXXXXX   |
| In-TeSp        | 3 | 154315. | XXXXXX   |
| Flex-AryaInd   | 3 | 161236. | XXXXXX   |
| Can-PGRFran    | 3 | 166321. | XXXXXX   |
| La-ErizoSp     | 3 | 172506. | XXXXXXXX |
| Con-SCKo       | 3 | 191607. | XXXXXXXX |
| Can-HBJUSA     | 3 | 224465. | XXXXXXXX |
| Ag-TendSud     | 3 | 232246. | XXXXXXXX |
| Ac-G22843Se    | 3 | 236021. | XXXXXXXX |
| Am-HassanTur   | 3 | 264528. | X XXXXX  |
| In-CrabPor     | 2 | 268637. | XXXXXXXX |
| In-TDewUSA     | 3 | 318093. | XXXXXX   |
| Con-PauPol     | 3 | 341145. | XXXXXX   |
| In-LaBolasSp   | 3 | 353508. | XXXX     |
| Can-PearlJa    | 3 | 356353. | XXXX     |
| Ag-15591Gha    | 3 | 383004. | XXX      |
| In-BBredSp     | 3 | 417990. | XX       |
| In-BBescrSp    | 3 | 448670. | X        |
| Ag-CallInd     | 3 | 696424. | X        |

#### LSD analysis for LD.7 per accessions

Method: 95.0 percentage LSD

| <i>accessions</i> | <i>Cases</i> | <i>Mean</i> | <i>Homogeneous groups</i> |
|-------------------|--------------|-------------|---------------------------|
| Am-YokIs          | 2            | 34827.0     | X                         |
| In-ComunSp        | 2            | 35643.0     | X                         |
| Con-GMJJa         | 3            | 53745.3     | X                         |
| Mom-PII24Ind      | 3            | 65950.0     | X                         |
| Ac-TGR1551Zimb    | 3            | 68323.7     | X                         |
| Can-DulUSA        | 3            | 68712.7     | X                         |
| Dud-QAPMGeorg     | 3            | 69697.7     | X                         |
| Ac-SVIIInd        | 2            | 73927.5     | XX                        |
| La-CascaPor       | 2            | 81432.5     | XXX                       |
| Dud-QPMAfg        | 3            | 83033.0     | X                         |
| Can-VedFran       | 3            | 88535.3     | X                         |
| Am-KizilUzbe      | 3            | 89542.7     | X                         |
| Con-BaishChi      | 3            | 92888.0     | X                         |
| Mom-KhaInd        | 3            | 98194.3     | XX                        |
| Flex-SnakeSA      | 3            | 98710.3     | XX                        |
| Con-ShiroJa       | 3            | 100019.     | XX                        |
| Flex-AryaInd      | 3            | 102294.     | XXX                       |
| Am-korcaRus       | 3            | 107684.     | XXX                       |
| Con-SCKo          | 3            | 110663.     | XXXX                      |
| Can-NOFran        | 2            | 112065.     | XXXX                      |
| In-TeNinvSp2      | 2            | 113150.     | XXXX                      |
| La-OgenBul        | 3            | 113690.     | XXXX                      |
| Can-SucrFran      | 3            | 115698.     | XXXX                      |
| Am-AnaFran        | 3            | 119417.     | XXXX                      |
| Am-TokTaj         | 3            | 123916.     | XXXX                      |
| chate-Carlta      | 1            | 133061.     | XXXXXX                    |
| Can-PGRFran       | 3            | 136623.     | XXXX                      |
| Can-TopUSA        | 3            | 136984.     | XXXX                      |
| In-HoneyDewUSA    | 3            | 141146.     | XXXX                      |
| Con-MielChi       | 3            | 141359.     | XXXX                      |
| Can-EfJa          | 3            | 143366.     | XXXX                      |
| Can-WiUSA         | 3            | 143701.     | XXXX                      |
| Can-GCHUSA        | 3            | 144904.     | XXXXXX                    |
| Am-HassanTur      | 3            | 145991.     | XXXXXX                    |
| Chi-VellInd       | 3            | 150110.     | XXXXXX                    |
| In-CrabPor        | 2            | 150746.     | XXXXXX                    |
| Am-NesviGeor      | 3            | 154927.     | XXXXXX                    |
| Ac-SRKSLan        | 3            | 157091.     | XXXXXX                    |
| Can-GyFran        | 2            | 163605.     | XXXXXX                    |
| In-RoMoch1Sp      | 3            | 176614.     | XXXXXX                    |
| In-BBredSp        | 3            | 178827.     | XXXXXX                    |
| In-TeNinvSp       | 2            | 183198.     | XXXXXX                    |
| Mom-MR1Ind        | 3            | 184082.     | XXXXXX                    |
| La-ZatIta         | 3            | 187372.     | XXXXXX                    |
| In-LaBolasSp      | 3            | 201482.     | XXXXXX                    |
| Can-HBJUSA        | 3            | 203910.     | XXXXXX                    |
| In-AmCañSp        | 3            | 205015.     | XXXXXX                    |
| Can-SemUSA        | 2            | 205823.     | XXXXXX                    |
| La-ErizoSp        | 3            | 208143.     | XXXXXX                    |
| La-KroFran        | 4            | 210006.     | XXXXXX                    |
| Can-Ogen2Is       | 3            | 212379.     | XXXXXX                    |
| Can-EanaHun       | 3            | 213191.     | XXXXXX                    |
| In-CGBUSA         | 3            | 224954.     | XXXXXX                    |
| Ac-G22843Se       | 3            | 225257.     | XXXXXX                    |
| Ag-15591Gha       | 3            | 231721.     | XXXXXX                    |
| In-BBescrSp       | 3            | 232612.     | XXXXXX                    |



|              |   |         |         |
|--------------|---|---------|---------|
| In-AmAoroSp  | 2 | 232661. | XXXXXXX |
| In-TeSp      | 3 | 239494. | XXXXXXX |
| Ag-CallInd   | 3 | 246587. | XXXXXXX |
| In-PsPiñSp   | 3 | 260498. | XXXXXXX |
| In-LaEscrSp  | 2 | 266434. | XXXXXXX |
| Can-PearlJa  | 3 | 304035. | XXXXXXX |
| Con-NanChi   | 3 | 304036. | XXXXXXX |
| Ag-TendSud   | 3 | 308613. | XXXXXXX |
| In-TDewUSA   | 3 | 309575. | XXXXXXX |
| Tibish-Ksud  | 3 | 309755. | XXXXXXX |
| Am-KafEgy    | 2 | 342967. | XXXXXXX |
| Con-PauPol   | 3 | 352157. | XXXXXX  |
| Flex-Co20Ind | 3 | 415031. | XXXXX   |
| Can-NCFran   | 2 | 465051. | XXX     |
| Ag-WChInd    | 3 | 506884. | XX      |
| Con-FreeCJa  | 3 | 519061. | X       |

### LSD analysis for LD.8 per accessions

Method: 95.0 percentage LSD

| <i>accessions</i> | <i>Cases</i> | <i>Mean</i> | <i>Homogeneous groups</i> |
|-------------------|--------------|-------------|---------------------------|
| La-CascaPor       | 2            | 284679.     | XX                        |
| Can-GCHUSA        | 3            | 330745.     | X                         |
| Con-MielChi       | 3            | 339052.     | XX                        |
| Con-BaishChi      | 3            | 343081.     | XX                        |
| Am-AnaFran        | 3            | 365487.     | XX                        |
| Con-SCKo          | 3            | 373639.     | XX                        |
| Can-DulUSA        | 3            | 384710.     | XX                        |
| Dud-QPMAfg        | 3            | 392890.     | XXX                       |
| Ac-SRKSLan        | 3            | 396506.     | XXX                       |
| Ac-SVIInd         | 2            | 399235.     | XXXXXX                    |
| Con-GMJJa         | 3            | 399774.     | XXX                       |
| In-RoMoch1Sp      | 3            | 415668.     | XXXXX                     |
| Con-ShiroJa       | 3            | 420891.     | XXXXX                     |
| La-KroFran        | 4            | 427999.     | XXX                       |
| Con-NanChi        | 3            | 432729.     | XXXXXX                    |
| In-PsPiñSp        | 3            | 447635.     | XXXXXX                    |
| Can-TopUSA        | 3            | 452406.     | XXXXXX                    |
| Dud-QAPMGeorg     | 3            | 454629.     | XXXXXX                    |
| Mom-PII24Ind      | 3            | 455396.     | XXXXXX                    |
| Tibish-Ksud       | 3            | 466571.     | XXXXXX                    |
| Am-KafEgy         | 2            | 468108.     | XXXXXXX                   |
| Am-NesviGeor      | 3            | 468504.     | XXXXXX                    |
| Con-PauPol        | 3            | 470469.     | XXXXXX                    |
| chate-Carlta      | 1            | 470500.     | XXXXXXXXX                 |
| Am-korcaRus       | 3            | 479662.     | XXXXXX                    |
| In-TeNinvSp2      | 2            | 483101.     | XXXXXXX                   |
| Ag-TendSud        | 3            | 488595.     | XXXXXX                    |
| Ac-TGR1551Zimb    | 3            | 489911.     | XXXXXX                    |
| Con-FreeCJa       | 3            | 498957.     | XXXXXX                    |
| Can-SucrFran      | 3            | 501303.     | XXXXXX                    |
| In-CrabPor        | 2            | 517349.     | XXXXXXXXX                 |
| La-OgenBul        | 3            | 523449.     | XXXXXXX                   |
| Ag-CallInd        | 3            | 527698.     | XXXXXXX                   |
| Ag-WChInd         | 3            | 529103.     | XXXXXXX                   |
| Flex-SnakeSA      | 3            | 541772.     | XXXXXXXXX                 |
| In-LaBolasSp      | 3            | 542454.     | XXXXXXXXX                 |

|                |   |           |            |
|----------------|---|-----------|------------|
| In-AmAoroSp    | 2 | 554774.   | XXXXXXXX   |
| In-BBescrSp    | 3 | 559295.   | XXXXXXXX   |
| Flex-Co20Ind   | 3 | 563418.   | XXXXXXXX   |
| Can-EanaHun    | 3 | 566840.   | XXXXXXXX   |
| Am-HassanTur   | 3 | 567130.   | XXXXXXXX   |
| Can-Ogen2Is    | 3 | 569628.   | XXXXXXXX   |
| La-ErizoSp     | 3 | 577343.   | XXXXXXXX   |
| Can-NCFran     | 2 | 587566.   | XXXXXXXX   |
| In-TDewUSA     | 3 | 588056.   | XXXXXXXX   |
| In-LaEscrSp    | 2 | 608199.   | XXXXXXXX   |
| Can-EfJa       | 3 | 608211.   | XXXXXXXX   |
| In-AmCañSp     | 3 | 613588.   | XXXXXXXX   |
| Can-PGRFran    | 3 | 618152.   | XXXXXXXX   |
| Chi-VellInd    | 3 | 631170.   | XXXXXXXX   |
| In-HoneyDewUSA | 3 | 658616.   | XXXXXXXX   |
| Am-KizilUzbe   | 3 | 668356.   | XXXXXXXX   |
| Can-HBJUSA     | 3 | 678337.   | XXXXXXXX   |
| Mom-MRIInd     | 3 | 692862.   | XXXXXXXX   |
| Can-GyFran     | 2 | 694592.   | XXXXXXXXXX |
| Flex-AryaInd   | 3 | 698089.   | XXXXXXXXXX |
| Can-PearlJa    | 3 | 718938.   | XXXXXXXXXX |
| In-BBredSp     | 3 | 732566.   | XXXXXXXXXX |
| Can-VedFran    | 3 | 739039.   | XXXXXXXXXX |
| In-TeNinvSp    | 2 | 751427.   | XXXXXXXXXX |
| La-ZatIta      | 3 | 754596.   | XXXXXXXXXX |
| In-ComunSp     | 2 | 780102.   | XXXXXXXXXX |
| In-TeSp        | 3 | 811531.   | XXXXXXXXXX |
| Can-WiUSA      | 3 | 828648.   | XXXXXXX    |
| Ag-15591Gha    | 3 | 855008.   | XXXXXX     |
| Am-YokIs       | 2 | 904649.   | XXXXXXX    |
| Mom-KhaInd     | 3 | 940899.   | XXXXX      |
| Ac-G22843Se    | 3 | 962136.   | XXXXX      |
| In-CGBUSA      | 3 | 1.13024E6 | XXX        |
| Can-NOFran     | 2 | 1.26334E6 | XX         |
| Am-TokTaj      | 3 | 1.36609E6 | X          |
| Can-SemUSA     | 2 | 1.94383E6 | X          |

#### LSD analysis for LD.9 per accessions

Method: 95.0 percentage LSD

| <i>accessions</i> | <i>Cases</i> | <i>Mean</i> | <i>Homogeneous groups</i> |
|-------------------|--------------|-------------|---------------------------|
| Can-GCHUSA        | 3            | 750.0       | X                         |
| La-CascaPor       | 2            | 750.0       | XX                        |
| Am-YokIs          | 2            | 17206.0     | XXX                       |
| Ac-TGR1551Zimb    | 3            | 18962.3     | XX                        |
| In-RoMoch1Sp      | 3            | 24624.7     | XX                        |
| Can-Ogen2Is       | 3            | 26067.7     | XX                        |
| Ac-SVIIInd        | 2            | 27051.5     | XXXX                      |
| Am-AnaFran        | 3            | 27247.7     | XX                        |
| La-ZatIta         | 3            | 32201.3     | XXX                       |
| Chi-VellInd       | 3            | 32842.7     | XXX                       |
| In-ComunSp        | 2            | 33048.0     | XXXX                      |
| Con-GMJJa         | 3            | 36733.3     | XXX                       |
| Tibish-Ksud       | 3            | 38976.3     | XXXX                      |
| Mom-MRIInd        | 3            | 40736.7     | XXXX                      |
| Am-korcaRus       | 3            | 40875.3     | XXXX                      |
| Am-KizilUzbe      | 3            | 41311.0     | XXXX                      |

|                |   |         |              |
|----------------|---|---------|--------------|
| Con-BaishChi   | 3 | 42275.0 | XXXX         |
| Con-ShiroJa    | 3 | 42810.7 | XXXX         |
| La-KroFran     | 4 | 42870.5 | XXX          |
| Mom-PII24Ind   | 3 | 43439.3 | XXXX         |
| In-PsPiñSp     | 3 | 46350.7 | XXXXXX       |
| Flex-SnakeSA   | 3 | 47230.0 | XXXXXX       |
| Ac-SRKSLan     | 3 | 53163.7 | XXXXXXXX     |
| Am-KafEgy      | 2 | 54973.5 | XXXXXXXX     |
| Flex-AryaInd   | 3 | 57313.7 | XXXXXXXX     |
| In-CGBUSA      | 3 | 59268.3 | XXXXXXXX     |
| Can-VedFran    | 3 | 65143.7 | XXXXXXXX     |
| Dud-QPMAfg     | 3 | 66305.7 | XXXXXXXX     |
| Can-WiUSA      | 3 | 66670.7 | XXXXXXXX     |
| chate-Carlta   | 1 | 67527.0 | XXXXXXXXXXXX |
| Am-NesviGeor   | 3 | 68035.0 | XXXXXXXX     |
| In-HoneyDewUSA | 3 | 70611.0 | XXXXXXXX     |
| In-TeNinvSp    | 2 | 75035.0 | XXXXXXXX     |
| In-AmAoroSp    | 2 | 75631.0 | XXXXXXXX     |
| In-LaEscrSp    | 2 | 76662.0 | XXXXXXXX     |
| In-AmCañSp     | 3 | 77773.3 | XXXXXXXX     |
| Ag-WChInd      | 3 | 77965.3 | XXXXXXXX     |
| Am-TokTaj      | 3 | 80756.3 | XXXXXXXX     |
| Flex-Co20Ind   | 3 | 82726.3 | XXXXXXXX     |
| Mom-KhaInd     | 3 | 87509.0 | XXXXXXXX     |
| Can-PGRFran    | 3 | 88095.3 | XXXXXXXX     |
| Ag-TendSud     | 3 | 88623.7 | XXXXXXXX     |
| Can-NCFran     | 2 | 90573.5 | XXXXXXXXXXXX |
| La-OgenBul     | 3 | 90632.0 | XXXXXXXX     |
| Con-SCKo       | 3 | 101308. | XXXXXXXX     |
| In-TeNinvSp2   | 2 | 101592. | XXXXXXXXXXXX |
| Can-EfJa       | 3 | 103420. | XXXXXXXXXXXX |
| Con-NanChi     | 3 | 106069. | XXXXXXXXXXXX |
| Can-GyFran     | 2 | 110123. | XXXXXXXXXXXX |
| Con-FreeCJa    | 3 | 111987. | XXXXXXXXXXXX |
| In-TeSp        | 3 | 112507. | XXXXXXXXXXXX |
| Can-SucrFran   | 3 | 112653. | XXXXXXXXXXXX |
| Can-EanaHun    | 3 | 114714. | XXXXXXXXXXXX |
| Dud-QAPMGeorg  | 3 | 115708. | XXXXXXXXXXXX |
| Can-NOFran     | 2 | 119879. | XXXXXXXXXXXX |
| Ac-G22843Se    | 3 | 135063. | XXXXXXXXXXXX |
| In-TDewUSA     | 3 | 143471. | XXXXXXXX     |
| La-ErizoSp     | 3 | 145384. | XXXXXXXX     |
| Am-HassanTur   | 3 | 152827. | XXXXXXX      |
| Can-DulUSA     | 3 | 154793. | XXXXXX       |
| In-CrabPor     | 2 | 164697. | XXXXXXXXXXXX |
| Ag-15591Gha    | 3 | 167607. | XXXXXX       |
| Con-MielChi    | 3 | 178483. | XXXXXX       |
| Can-SemUSA     | 2 | 182704. | XXXXXXXX     |
| Can-TopUSA     | 3 | 203448. | XXXXXX       |
| In-BBredSp     | 3 | 207960. | XXXXXX       |
| In-LaBolasSp   | 3 | 221960. | XXXX         |
| Can-PearlJa    | 3 | 266891. | XXXX         |
| In-BBescrSp    | 3 | 276461. | XXX          |
| Con-PauPol     | 3 | 294202. | XX           |
| Can-HBJUSA     | 3 | 296115. | XX           |
| Ag-CallInd     | 3 | 344037. | X            |

# LSD analysis for LD.10 per accessions

Method: 95.0 percentage LSD

| <i>accessions</i> | <i>Cases</i> | <i>Mean</i> | <i>Homogeneous groups</i> |
|-------------------|--------------|-------------|---------------------------|
| Ac-TGR1551Zimb    | 3            | 19277.0     | X                         |
| Ac-SVIIInd        | 2            | 28821.5     | XX                        |
| Con-GMJJa         | 3            | 30413.0     | X                         |
| Dud-QPMAfg        | 3            | 41994.0     | XX                        |
| Con-ShiroJa       | 3            | 45112.7     | XX                        |
| In-ComunSp        | 2            | 49309.5     | XX                        |
| Mom-PII24Ind      | 3            | 49406.7     | XX                        |
| Am-YokIs          | 2            | 51626.0     | XX                        |
| Am-KizilUzbe      | 3            | 53969.7     | XX                        |
| Can-SucrFran      | 3            | 57712.0     | XX                        |
| La-CascaPor       | 2            | 58729.5     | XX                        |
| Can-VedFran       | 3            | 61317.7     | XX                        |
| Flex-SnakeSA      | 3            | 63037.0     | XX                        |
| In-RoMochISp      | 3            | 63178.7     | XX                        |
| Con-BaishChi      | 3            | 64910.0     | XX                        |
| Dud-QAPMGeorg     | 3            | 73356.0     | XX                        |
| In-TeNinvSp2      | 2            | 73495.0     | XXXX                      |
| Ac-SRKSLan        | 3            | 73641.7     | XX                        |
| Con-MielChi       | 3            | 74060.0     | XX                        |
| chate-CarIta      | 1            | 75405.0     | XXXXXXXXXX                |
| Can-DulUSA        | 3            | 81125.0     | XXX                       |
| Chi-VellInd       | 3            | 81776.0     | XXX                       |
| Can-EfJa          | 3            | 81919.3     | XXX                       |
| La-ZatIta         | 3            | 84418.0     | XXXX                      |
| Am-korcaRus       | 3            | 85083.7     | XXXX                      |
| In-HoneyDewUSA    | 3            | 87255.0     | XXXX                      |
| In-TeNinvSp       | 2            | 88033.0     | XXXXXX                    |
| Can-NOFran        | 2            | 88631.0     | XXXXXX                    |
| Can-TopUSA        | 3            | 97690.0     | XXXXXX                    |
| In-PsPiñSp        | 3            | 102090.     | XXXXXX                    |
| Flex-AryaInd      | 3            | 102465.     | XXXXXX                    |
| Am-TokTaj         | 3            | 103262.     | XXXXXX                    |
| Can-WiUSA         | 3            | 103436.     | XXXXXX                    |
| In-AmCañSp        | 3            | 104863.     | XXXXXX                    |
| In-CrabPor        | 2            | 105401.     | XXXXXXXXXX                |
| Tibish-Ksud       | 3            | 106342.     | XXXXXX                    |
| Can-GCHUSA        | 3            | 106566.     | XXXXXX                    |
| La-OgenBul        | 3            | 109646.     | XXXXXX                    |
| Con-NanChi        | 3            | 110188.     | XXXXXX                    |
| Mom-KhaInd        | 3            | 113175.     | XXXXXX                    |
| In-LaEscrSp       | 2            | 116254.     | XXXXXXXXXX                |
| Am-NesviGeor      | 3            | 116434.     | XXXXXXXXXX                |
| Can-EanaHun       | 3            | 120509.     | XXXXXXXXXX                |
| In-AmAoroSp       | 2            | 120645.     | XXXXXXXXXX                |
| Can-Ogen2Is       | 3            | 127211.     | XXXXXXXXXX                |
| Con-SCKo          | 3            | 127823.     | XXXXXXXXXX                |
| Can-PGRFran       | 3            | 130051.     | XXXXXXXXXX                |
| In-CGBUSA         | 3            | 130199.     | XXXXXXXXXX                |
| Mom-MR1Ind        | 3            | 133376.     | XXXXXXXXXX                |
| Can-SemUSA        | 2            | 136991.     | XXXXXXXXXX                |
| Am-AnaFran        | 3            | 137535.     | XXXXXXXXXX                |
| La-ErizoSp        | 3            | 143005.     | XXXXXXXXXX                |
| La-KroFran        | 4            | 146242.     | XXXXXXXXXX                |

|              |   |         |            |
|--------------|---|---------|------------|
| In-BBredSp   | 3 | 161718. | XXXXXXXXXX |
| Am-HassanTur | 3 | 161816. | XXXXXXXXXX |
| Can-HBJUSA   | 3 | 162981. | XXXXXXXXXX |
| Can-GyFran   | 2 | 176280. | XXXXXXXXXX |
| Can-NCFran   | 2 | 182506. | XXXXXXXXXX |
| In-TeSp      | 3 | 193823. | XXXXXXXXXX |
| Con-FreeCJa  | 3 | 194071. | XXXXXXXXXX |
| Am-KafEgy    | 2 | 206237. | XXXXXXXXXX |
| In-BBescrSp  | 3 | 232937. | XXXXXXXXXX |
| In-TDewUSA   | 3 | 237069. | XXXXXXX    |
| In-LaBolasSp | 3 | 246949. | XXXXXXX    |
| Con-PauPol   | 3 | 251071. | XXXXXXX    |
| Ac-G22843Se  | 3 | 256106. | XXXXXX     |
| Can-PearlJa  | 3 | 262905. | XXXX       |
| Ag-WChInd    | 3 | 267942. | XXXX       |
| Flex-Co20Ind | 3 | 278220. | XXX        |
| Ag-TendSud   | 3 | 278821. | XXX        |
| Ag-15591Gha  | 3 | 320335. | XX         |
| Ag-CallInd   | 3 | 421362. | X          |

#### LSD analysis for LD.11 per accessions

Method: 95.0 percentage LSD

| <i>accessions</i> | <i>Cases</i> | <i>Mean</i> | <i>Homogeneous groups</i> |
|-------------------|--------------|-------------|---------------------------|
| Con-MielChi       | 3            | 750.0       | X                         |
| Can-Ogen2Is       | 3            | 750.0       | X                         |
| Dud-QPMAfg        | 3            | 750.0       | X                         |
| Ac-SVIIInd        | 2            | 750.0       | X                         |
| Ac-TGR1551Zimb    | 3            | 750.0       | X                         |
| La-ZatIta         | 3            | 750.0       | X                         |
| Can-PGRFran       | 3            | 1075.0      | X                         |
| Con-PauPol        | 3            | 1107.67     | X                         |
| Con-FreeCJa       | 3            | 1164.33     | X                         |
| Ac-SRKSLan        | 3            | 1167.0      | X                         |
| Can-SucrFran      | 3            | 1206.67     | X                         |
| Can-WiUSA         | 3            | 1249.67     | X                         |
| Mom-MR1Ind        | 3            | 1283.0      | X                         |
| Can-NOFran        | 2            | 1361.5      | X                         |
| Am-AnaFran        | 3            | 1394.0      | X                         |
| Can-SemUSA        | 2            | 1405.5      | X                         |
| Flex-Co20Ind      | 3            | 1488.33     | X                         |
| Mom-PII24Ind      | 3            | 1726.67     | X                         |
| In-TeNinvSp2      | 2            | 1744.0      | X                         |
| Con-NanChi        | 3            | 1794.67     | X                         |
| Con-GMJJa         | 3            | 1814.67     | X                         |
| Can-GyFran        | 2            | 1821.5      | X                         |
| In-BBescrSp       | 3            | 1847.33     | X                         |
| Am-TokTaj         | 3            | 1889.0      | X                         |
| In-CrabPor        | 2            | 2367.5      | X                         |
| La-CascaPor       | 2            | 2423.0      | X                         |
| In-BBredSp        | 3            | 2500.0      | X                         |
| In-TeSp           | 3            | 2501.0      | X                         |
| La-OgenBul        | 3            | 2585.67     | X                         |
| Dud-QAPMGeorg     | 3            | 2595.33     | X                         |
| In-LaBolasSp      | 3            | 2712.67     | X                         |
| Can-VedFran       | 3            | 2837.67     | X                         |
| Chi-VellInd       | 3            | 3059.0      | X                         |

|                |   |         |   |
|----------------|---|---------|---|
| In-TDewUSA     | 3 | 3084.0  | X |
| La-KroFran     | 4 | 3171.25 | X |
| Can-DulUSA     | 3 | 3353.67 | X |
| Can-TopUSA     | 3 | 5084.0  | X |
| Mom-KhaInd     | 3 | 5186.67 | X |
| Can-NCFran     | 2 | 5393.0  | X |
| Can-EfJa       | 3 | 6111.33 | X |
| Can-PearlJa    | 3 | 6790.33 | X |
| In-HoneyDewUSA | 3 | 6939.67 | X |
| Am-korcaRus    | 3 | 7265.0  | X |
| In-LaEscrSp    | 2 | 7291.5  | X |
| Can-HBJUSA     | 3 | 7500.33 | X |
| In-TeNinvSp    | 2 | 7615.0  | X |
| Can-EanaHun    | 3 | 7857.0  | X |
| Can-GCHUSA     | 3 | 8165.0  | X |
| La-ErizoSp     | 3 | 10261.7 | X |
| Con-ShiroJa    | 3 | 10484.7 | X |
| Am-NesviGeor   | 3 | 10523.3 | X |
| Con-BaishChi   | 3 | 10571.7 | X |
| Tibish-Ksud    | 3 | 13565.0 | X |
| In-AmCañSp     | 3 | 15995.7 | X |
| Am-HassanTur   | 3 | 17319.7 | X |
| In-AmAoroSp    | 2 | 18877.0 | X |
| In-RoMoch1Sp   | 3 | 20522.7 | X |
| Con-SCKo       | 3 | 24101.7 | X |
| Ag-WChInd      | 3 | 26163.7 | X |
| In-ComunSp     | 2 | 30465.5 | X |
| Am-YokIs       | 2 | 34841.5 | X |
| Am-KizilUzbe   | 3 | 36505.3 | X |
| Ac-G22843Se    | 3 | 57777.0 | X |
| Ag-CallInd     | 3 | 75179.7 | X |
| Ag-TendSud     | 3 | 104880. | X |
| Ag-15591Gha    | 3 | 128539. | X |
| Flex-SnakeSA   | 3 | 154572. | X |
| In-PsPiñSp     | 3 | 181742. | X |
| Am-KafEgy      | 2 | 187189. | X |
| Flex-AryalInd  | 3 | 706251. | X |
| In-CGBUSA      | 3 | 747315. | X |
| chate-CarIta   | 1 | 778968. | X |

#### LSD analysis for LD.12 per accessions

Method: 95.0 percentage LSD

| <i>accessions</i> | <i>Cases</i> | <i>Mean</i> | <i>Homogeneous groups</i> |
|-------------------|--------------|-------------|---------------------------|
| Ac-TGR1551Zimb    | 3            | 7109.67     | X                         |
| Ac-SVIInd         | 2            | 9316.0      | XX                        |
| In-RoMoch1Sp      | 3            | 12107.3     | X                         |
| Mom-PII24Ind      | 3            | 14648.7     | XX                        |
| Tibish-Ksud       | 3            | 14993.7     | XX                        |
| In-TeNinvSp2      | 2            | 16468.0     | XX                        |
| Ac-SRKSLan        | 3            | 16642.0     | XX                        |
| Con-NanChi        | 3            | 16668.3     | XX                        |
| Dud-QPMAfg        | 3            | 17360.3     | XX                        |
| Can-SucrFran      | 3            | 17569.3     | XX                        |
| Can-VedFran       | 3            | 17758.0     | XX                        |
| In-AmAoroSp       | 2            | 18061.5     | XX                        |
| Chi-VellInd       | 3            | 18947.3     | XX                        |

|                |   |         |      |
|----------------|---|---------|------|
| La-ZatIta      | 3 | 19855.0 | XX   |
| In-AmCañSp     | 3 | 20274.0 | XX   |
| In-LaEscrSp    | 2 | 21140.5 | XX   |
| La-CascaPor    | 2 | 21501.5 | XX   |
| In-TeNinvSp    | 2 | 23865.0 | XX   |
| Can-Ogen2Is    | 3 | 23894.3 | XX   |
| In-ComunSp     | 2 | 24182.0 | XX   |
| In-HoneyDewUSA | 3 | 24249.7 | XX   |
| Con-FreeCJa    | 3 | 24787.3 | XX   |
| Can-NCFran     | 2 | 24840.0 | XX   |
| Am-korcaRus    | 3 | 25148.3 | XX   |
| Mom-MR1Ind     | 3 | 25415.0 | XX   |
| La-KroFran     | 4 | 27271.0 | XX   |
| Can-GCHUSA     | 3 | 27710.7 | XX   |
| Con-GMJJa      | 3 | 27735.0 | XX   |
| Am-TokTaj      | 3 | 27753.0 | XX   |
| Dud-QAPMGeorg  | 3 | 28285.0 | XX   |
| Can-DulUSA     | 3 | 28412.0 | XX   |
| Con-MielChi    | 3 | 29413.7 | XX   |
| Can-EfJa       | 3 | 30099.0 | XX   |
| Can-TopUSA     | 3 | 30586.7 | XX   |
| Can-WiUSA      | 3 | 30750.0 | XX   |
| Can-EanaHun    | 3 | 31030.0 | XX   |
| Flex-Co20Ind   | 3 | 34148.0 | XX   |
| Can-SemUSA     | 2 | 34469.0 | XXX  |
| In-CrabPor     | 2 | 35105.5 | XXX  |
| Am-YokIs       | 2 | 35558.0 | XXX  |
| Am-AnaFran     | 3 | 35624.0 | XX   |
| Can-NOFran     | 2 | 35712.0 | XXX  |
| Con-BaishChi   | 3 | 38295.7 | XX   |
| Can-HBJUSA     | 3 | 38813.7 | XX   |
| Am-NesviGeor   | 3 | 39520.7 | XXX  |
| La-OgenBul     | 3 | 41932.0 | XXX  |
| Mom-KhaInd     | 3 | 42289.0 | XXX  |
| La-ErizoSp     | 3 | 43432.3 | XXX  |
| Can-PGRFran    | 3 | 44837.7 | XXX  |
| In-TeSp        | 3 | 49680.7 | XXX  |
| Con-SCKo       | 3 | 58232.3 | XXX  |
| Can-GyFran     | 2 | 60979.5 | XXX  |
| Con-PauPol     | 3 | 61310.3 | XXX  |
| In-TDewUSA     | 3 | 66031.0 | XXX  |
| In-BBredSp     | 3 | 67565.0 | XXX  |
| Am-KizilUzbe   | 3 | 67998.7 | XXX  |
| Can-PearlJa    | 3 | 70736.7 | XXX  |
| Flex-AryaInd   | 3 | 74225.7 | XXX  |
| In-BBescrSp    | 3 | 75088.3 | XXX  |
| Am-HassanTur   | 3 | 77351.0 | XXX  |
| In-LaBolasSp   | 3 | 84982.0 | XXX  |
| Am-KafEgy      | 2 | 88210.0 | XXX  |
| Con-ShiroJa    | 3 | 101029. | XXX  |
| Ag-WChInd      | 3 | 102475. | XXX  |
| Ac-G22843Se    | 3 | 103751. | XXX  |
| Ag-15591Gha    | 3 | 114348. | XXX  |
| chate-CarIta   | 1 | 122579. | XXXX |
| Ag-CallInd     | 3 | 140880. | XX   |
| In-PsPiñSp     | 3 | 208659. | X    |
| Ag-TendSud     | 3 | 209434. | X    |

|              |   |         |   |
|--------------|---|---------|---|
| Flex-SnakeSA | 3 | 391013. | X |
| In-CGBUSA    | 3 | 426248. | X |

#### LSD analysis for LD.13 per accessions

Method: 95.0 percentage LSD

| <i>accessions</i> | <i>Cases</i> | <i>Mean</i> | <i>Homogeneous groups</i> |
|-------------------|--------------|-------------|---------------------------|
| Ac-TGR1551Zimb    | 3            | 750.0       | X                         |
| Ac-SVIIInd        | 2            | 3444.0      | XXX                       |
| Con-ShiroJa       | 3            | 4495.67     | XX                        |
| Flex-SnakeSA      | 3            | 5470.33     | XX                        |
| Con-GMJJa         | 3            | 7722.0      | XXX                       |
| In-RoMoch1Sp      | 3            | 8085.67     | XXX                       |
| Con-SCKo          | 3            | 9197.0      | XXX                       |
| Con-BaishChi      | 3            | 10262.7     | XXX                       |
| Tibish-Ksud       | 3            | 10603.3     | XXX                       |
| Ac-SRKSLan        | 3            | 11045.7     | XXX                       |
| Dud-QPMAfg        | 3            | 11437.3     | XXX                       |
| Chi-VellInd       | 3            | 11440.7     | XXX                       |
| In-ComunSp        | 2            | 12699.0     | XXXX                      |
| La-ZatlIta        | 3            | 13553.7     | XXX                       |
| In-PsPiñSp        | 3            | 14311.7     | XXX                       |
| Mom-PII24Ind      | 3            | 15834.0     | XXX                       |
| Am-YokIs          | 2            | 16074.0     | XXXXXX                    |
| Can-Ogen2Is       | 3            | 16359.3     | XXX                       |
| Am-KizilUzbe      | 3            | 18370.0     | XXXX                      |
| Flex-AryaInd      | 3            | 20155.3     | XXXX                      |
| Con-NanChi        | 3            | 21203.0     | XXXX                      |
| In-CGBUSA         | 3            | 23535.7     | XXXXXX                    |
| La-OgenBul        | 3            | 23698.7     | XXXXXX                    |
| In-TeNinvSp       | 2            | 25790.0     | XXXXXX                    |
| La-KroFran        | 4            | 25888.3     | XXXXXX                    |
| chate-CarlIta     | 1            | 26221.0     | XXXXXXXXXXXX              |
| Ag-WChInd         | 3            | 27709.0     | XXXXXX                    |
| Can-GCHUSA        | 3            | 28986.3     | XXXXXX                    |
| Am-korcaRus       | 3            | 29422.3     | XXXXXX                    |
| In-AmAoroSp       | 2            | 30010.5     | XXXXXX                    |
| Mom-MR1Ind        | 3            | 32281.3     | XXXXXX                    |
| Can-VedFran       | 3            | 33828.7     | XXXXXX                    |
| In-HoneyDewUSA    | 3            | 34419.7     | XXXXXX                    |
| Can-NCFran        | 2            | 34746.5     | XXXXXX                    |
| Am-NesviGeor      | 3            | 34902.3     | XXXXXX                    |
| Flex-Co20Ind      | 3            | 35301.7     | XXXXXX                    |
| Ag-TendSud        | 3            | 35644.7     | XXXXXX                    |
| Am-HassanTur      | 3            | 36471.3     | XXXXXX                    |
| In-AmCañSp        | 3            | 37187.7     | XXXXXX                    |
| Con-PauPol        | 3            | 37873.3     | XXXXXX                    |
| In-LaEscrSp       | 2            | 37904.0     | XXXXXXXXXX                |
| Con-FreeCJa       | 3            | 38334.7     | XXXXXX                    |
| Am-KafEgy         | 2            | 38445.5     | XXXXXXXXXXXX              |
| Can-EanaHun       | 3            | 39491.7     | XXXXXX                    |
| In-TeNinvSp2      | 2            | 40182.5     | XXXXXXXXXXXX              |
| Can-WiUSA         | 3            | 41576.7     | XXXXXXXX                  |
| Mom-KhaInd        | 3            | 42002.0     | XXXXXXXX X                |
| Dud-QAPMGeorg     | 3            | 42810.3     | XXXXXXXXXX                |
| Can-EfJa          | 3            | 43600.0     | XXXXXXXXXXXX              |
| Am-TokTaj         | 3            | 44116.0     | XXXXXXXXXXXX              |



|              |   |         |              |
|--------------|---|---------|--------------|
| Con-MielChi  | 3 | 47358.3 | XXXXXXXXXXXX |
| La-CascaPor  | 2 | 50595.5 | XXXXXXXXXXXX |
| Can-GyFran   | 2 | 53867.5 | XXXXXXXXXXXX |
| Am-AnaFran   | 3 | 54241.7 | XXXXXXXXXXXX |
| Can-PGRFran  | 3 | 58357.0 | XXXXXXXXXXXX |
| Can-SucrFran | 3 | 73175.0 | XXXXXXXXXXXX |
| Can-NOFran   | 2 | 74786.0 | XXXXXXXXXXXX |
| Ag-15591Gha  | 3 | 75325.7 | XXXXXXXXXXXX |
| In-TeSp      | 3 | 75458.3 | XXXXXXXXXXXX |
| Ac-G22843Se  | 3 | 89994.3 | XXXXXXXXXXXX |
| In-LaBolasSp | 3 | 92720.3 | XXXXXXXXXXXX |
| In-BBescrSp  | 3 | 93506.0 | X XXXXXX     |
| In-CrabPor   | 2 | 99067.5 | XXXXXXXXXX   |
| Can-SemUSA   | 2 | 100645. | XXXXXXX      |
| La-ErizoSp   | 3 | 103888. | XXXXXX       |
| In-BBredSp   | 3 | 109044. | XXXXX        |
| Can-PearlJa  | 3 | 110282. | XXX          |
| Can-DulUSA   | 3 | 112687. | XXX          |
| In-TDewUSA   | 3 | 121033. | XXX          |
| Ag-CallInd   | 3 | 135657. | XX           |
| Can-HBJUSA   | 3 | 140118. | XX           |
| Can-TopUSA   | 3 | 162759. | X            |

#### LSD analysis for LD.14 per accessions

Method: 95.0 percentage LSD

| <i>accessions</i> | <i>Cases</i> | <i>Mean</i> | <i>Homogeneous groups</i> |
|-------------------|--------------|-------------|---------------------------|
| Am-NesviGeor      | 3            | 750.0       | X                         |
| Can-SucrFran      | 3            | 750.0       | X                         |
| La-ZatIta         | 3            | 750.0       | X                         |
| Mom-KhaInd        | 3            | 750.0       | X                         |
| Dud-QPMAfg        | 3            | 750.0       | X                         |
| Con-FreeCJa       | 3            | 750.0       | X                         |
| In-HoneyDewUSA    | 3            | 750.0       | X                         |
| In-LaEscrSp       | 2            | 750.0       | X                         |
| In-RoMoch1Sp      | 3            | 750.0       | X                         |
| In-CrabPor        | 2            | 750.0       | X                         |
| Flex-Co20Ind      | 3            | 750.0       | X                         |
| Am-KafEgy         | 2            | 750.0       | X                         |
| Mom-PII24Ind      | 3            | 750.0       | X                         |
| Am-korcaRus       | 3            | 750.0       | X                         |
| In-AmAoroSp       | 2            | 750.0       | X                         |
| Can-EanaHun       | 3            | 750.0       | X                         |
| Can-WiUSA         | 3            | 750.0       | X                         |
| La-CascaPor       | 2            | 750.0       | X                         |
| In-BBescrSp       | 3            | 750.0       | X                         |
| chate-CarIta      | 1            | 750.0       | XXX                       |
| Can-VedFran       | 3            | 750.0       | X                         |
| In-CGBUSA         | 3            | 750.0       | X                         |
| Ac-SVIIInd        | 2            | 750.0       | X                         |
| In-AmCañSp        | 3            | 750.0       | X                         |
| In-TDewUSA        | 3            | 750.0       | X                         |
| In-PsPiñSp        | 3            | 750.0       | X                         |
| Mom-MR1Ind        | 3            | 750.0       | X                         |
| Am-YokIs          | 2            | 803.0       | X                         |
| Ag-WChInd         | 3            | 1152.67     | X                         |
| Ac-TGR1551Zimb    | 3            | 1491.0      | X                         |

|               |   |         |      |
|---------------|---|---------|------|
| Tibish-Ksud   | 3 | 1786.67 | X    |
| In-TeSp       | 3 | 1854.67 | X    |
| La-KroFran    | 4 | 2171.75 | X    |
| Con-ShiroJa   | 3 | 2203.0  | X    |
| Ac-SRKSLan    | 3 | 2409.0  | X    |
| Flex-SnakeSA  | 3 | 2452.67 | X    |
| Can-GCHUSA    | 3 | 2685.0  | X    |
| Am-TokTaj     | 3 | 3524.33 | X    |
| Can-PearlJa   | 3 | 4030.67 | X    |
| La-ErizoSp    | 3 | 4080.0  | X    |
| Can-DulUSA    | 3 | 4204.33 | X    |
| In-BBredSp    | 3 | 4477.33 | X    |
| Can-Ogen2Is   | 3 | 4515.0  | X    |
| In-TeNinvSp   | 2 | 4587.5  | X    |
| Am-KizilUzbe  | 3 | 4735.0  | X    |
| Am-HassanTur  | 3 | 5681.33 | X    |
| In-ComunSp    | 2 | 6979.0  | XX   |
| Flex-AryaInd  | 3 | 7105.0  | X    |
| Can-GyFran    | 2 | 7625.0  | XX   |
| Can-NCFran    | 2 | 8175.0  | XX   |
| Can-EfJa      | 3 | 8201.67 | X    |
| In-LaBolasSp  | 3 | 8517.0  | X    |
| Chi-VellInd   | 3 | 8724.33 | X    |
| Am-AnaFran    | 3 | 8775.0  | X    |
| Con-NanChi    | 3 | 9743.33 | X    |
| Can-PGRFran   | 3 | 9875.0  | X    |
| Ac-G22843Se   | 3 | 10676.3 | XX   |
| In-TeNinvSp2  | 2 | 11616.5 | XXX  |
| Can-TopUSA    | 3 | 12121.3 | XX   |
| Can-NOFran    | 2 | 13448.0 | XXX  |
| Con-GMJJa     | 3 | 16353.3 | XXX  |
| Ag-TendSud    | 3 | 19740.3 | XXXX |
| Can-HBJUSA    | 3 | 23618.0 | XXXX |
| Con-PauPol    | 3 | 25810.0 | XXXX |
| Con-BaishChi  | 3 | 33324.0 | XXXX |
| Can-SemUSA    | 2 | 33749.5 | XXXX |
| Dud-QAPMGeorg | 3 | 38860.3 | XXXX |
| Ag-CallInd    | 3 | 54711.0 | XXX  |
| Con-SCKo      | 3 | 60634.3 | XX   |
| La-OgenBul    | 3 | 63703.3 | X    |
| Ag-15591Gha   | 3 | 152269. | X    |
| Con-MielChi   | 3 | 321863. | X    |

#### LSD analysis for M.1 per accessions

Method: 95.0 percentage LSD

| <i>accessions</i> | <i>Cases</i> | <i>Mean</i> | <i>Homogeneous groups</i> |
|-------------------|--------------|-------------|---------------------------|
| Tibish-Ksud       | 3            | 3896.67     | X                         |
| Con-SCKo          | 3            | 3923.33     | X                         |
| Ac-SVIIInd        | 2            | 5643.0      | XXX                       |
| Ac-TGR1551Zimb    | 3            | 5888.0      | X                         |
| Con-ShiroJa       | 3            | 6036.0      | X                         |
| In-RoMoch1Sp      | 3            | 6068.67     | X                         |
| In-PsPiñSp        | 3            | 6115.67     | X                         |
| La-KroFran        | 4            | 6212.75     | X                         |
| In-CGBUSA         | 3            | 6731.0      | XX                        |
| Dud-QPMAfg        | 3            | 7152.0      | XX                        |

|                |   |         |         |
|----------------|---|---------|---------|
| Am-AnaFran     | 3 | 7166.0  | XX      |
| Can-EanaHun    | 3 | 7924.67 | XXX     |
| Am-HassanTur   | 3 | 7983.67 | XXX     |
| Con-FreeCJa    | 3 | 8223.33 | XXX     |
| Can-Ogen2Is    | 3 | 8267.0  | XXX     |
| Ag-WChInd      | 3 | 8744.0  | XXX     |
| Ag-TendSud     | 3 | 9041.67 | XXXX    |
| Chi-VellInd    | 3 | 9084.67 | XXXX    |
| Con-PauPol     | 3 | 9132.67 | XXXX    |
| Can-DulUSA     | 3 | 9364.67 | XXXX    |
| In-HoneyDewUSA | 3 | 9374.0  | XXXX    |
| Can-PGRFran    | 3 | 10021.0 | XXXX    |
| Can-NCFran     | 2 | 10445.5 | XXXX    |
| Can-NOFran     | 2 | 10480.5 | XXXX    |
| In-TeNinvSp    | 2 | 10590.0 | XXXX    |
| Ac-SRKSLan     | 3 | 10816.7 | XXXX    |
| Flex-Co20Ind   | 3 | 10919.0 | XXXX    |
| In-AmAoroSp    | 2 | 11082.0 | XXXX    |
| Can-GyFran     | 2 | 11165.0 | XXXX    |
| In-TeNinvSp2   | 2 | 11497.5 | XXXX    |
| La-ZatIta      | 3 | 11865.7 | XXXX    |
| Am-KizilUzbe   | 3 | 11966.3 | XXXX    |
| Can-GCHUSA     | 3 | 12580.7 | XXXX    |
| Can-VedFran    | 3 | 12663.3 | XXXX    |
| In-BBescrSp    | 3 | 13591.3 | XXXX    |
| Flex-AryaInd   | 3 | 14174.3 | XXXX    |
| Con-MielChi    | 3 | 14481.3 | XXXX    |
| Am-korcaRus    | 3 | 14568.0 | XXXX    |
| Ag-CallInd     | 3 | 15266.3 | XXXX    |
| Can-SucrFran   | 3 | 15999.3 | XXXX    |
| La-OgenBul     | 3 | 16046.3 | XXXX    |
| Mom-MRIInd     | 3 | 16150.0 | XXXX    |
| Am-NesviGeor   | 3 | 16381.0 | XXXX    |
| Can-PearlJa    | 3 | 16622.3 | XXXX    |
| In-ComunSp     | 2 | 16713.5 | XXXXXX  |
| Flex-SnakeSA   | 3 | 16803.0 | XXXX    |
| Am-YokIs       | 2 | 17112.5 | XXXXXX  |
| In-AmCañSp     | 3 | 17649.7 | XXXXXX  |
| La-ErizoSp     | 3 | 17757.3 | XXXXXX  |
| In-LaBolasSp   | 3 | 18203.3 | XXXXXX  |
| Am-KafEgy      | 2 | 18344.0 | XXXXXX  |
| Con-GMJJa      | 3 | 18411.0 | XXXXXX  |
| Am-TokTaj      | 3 | 18473.7 | XXXXXX  |
| Con-BaishChi   | 3 | 19478.7 | XXXXXX  |
| Con-NanChi     | 3 | 19968.7 | XXXXXX  |
| In-TDewUSA     | 3 | 20616.7 | XXXXXX  |
| In-LaEscrSp    | 2 | 24215.5 | XXXXXX  |
| Mom-PII24Ind   | 3 | 24266.3 | XXXXXX  |
| Can-TopUSA     | 3 | 27584.7 | XXXXXX  |
| In-TeSp        | 3 | 28867.7 | XXXXXXX |
| Can-HBJUSA     | 3 | 31804.7 | XXXXXX  |
| Can-EfJa       | 3 | 32164.7 | XXXXXX  |
| In-BBredSp     | 3 | 34342.3 | XXX     |
| Can-SemUSA     | 2 | 35667.0 | XXXX    |
| In-CrabPor     | 2 | 46013.5 | XXX     |
| Ac-G22843Se    | 3 | 53343.0 | XX      |
| Can-WiUSA      | 3 | 72621.3 | XX      |

|               |   |         |    |
|---------------|---|---------|----|
| Dud-QAPMGeorg | 3 | 72847.3 | XX |
| chate-CarIta  | 1 | 79287.0 | XX |
| Mom-KhaInd    | 3 | 90235.0 | X  |
| La-CascaPor   | 2 | 449845. | X  |
| Ag-15591Gha   | 3 | 907284. | X  |

#### LSD analysis for M.2 per accessions

Method: 95.0 percentage LSD

| <i>accessions</i> | <i>Cases</i> | <i>Mean</i> | <i>Homogeneous groups</i> |
|-------------------|--------------|-------------|---------------------------|
| Con-NanChi        | 3            | 750.0       | X                         |
| Con-MielChi       | 3            | 750.0       | X                         |
| Can-GCHUSA        | 3            | 750.0       | X                         |
| Flex-SnakeSA      | 3            | 750.0       | X                         |
| Dud-QPMAfg        | 3            | 750.0       | X                         |
| Can-EfJa          | 3            | 750.0       | X                         |
| Can-Ogen2Is       | 3            | 750.0       | X                         |
| In-BBredSp        | 3            | 750.0       | X                         |
| In-AmAoroSp       | 2            | 750.0       | X                         |
| Ag-CallInd        | 3            | 750.0       | X                         |
| Ac-SRKSLan        | 3            | 750.0       | X                         |
| Am-NesviGeor      | 3            | 750.0       | X                         |
| Can-GyFran        | 2            | 750.0       | X                         |
| Ac-TGR1551Zimb    | 3            | 750.0       | X                         |
| In-ComunSp        | 2            | 750.0       | X                         |
| Mom-MR1Ind        | 3            | 750.0       | X                         |
| Can-TopUSA        | 3            | 750.0       | X                         |
| In-RoMoch1Sp      | 3            | 750.0       | X                         |
| In-LaEscrSp       | 2            | 750.0       | X                         |
| Mom-PII24Ind      | 3            | 750.0       | X                         |
| Ac-SVIInd         | 2            | 750.0       | X                         |
| Chi-VellInd       | 3            | 750.0       | X                         |
| In-LaBolasSp      | 3            | 750.0       | X                         |
| La-OgenBul        | 3            | 750.0       | X                         |
| Can-PGRFran       | 3            | 750.0       | X                         |
| Can-PearlJa       | 3            | 750.0       | X                         |
| In-CrabPor        | 2            | 750.0       | X                         |
| Am-KafEgy         | 2            | 750.0       | X                         |
| Can-NOFran        | 2            | 750.0       | X                         |
| In-TDewUSA        | 3            | 750.0       | X                         |
| In-HoneyDewUSA    | 3            | 750.0       | X                         |
| Am-korcaRus       | 3            | 750.0       | X                         |
| Am-AnaFran        | 3            | 750.0       | X                         |
| Con-FreeCJa       | 3            | 750.0       | X                         |
| Tibish-Ksud       | 3            | 750.0       | X                         |
| Am-TokTaj         | 3            | 757.333     | X                         |
| Con-PauPol        | 3            | 759.667     | X                         |
| Can-SucrFran      | 3            | 765.0       | X                         |
| Con-ShiroJa       | 3            | 767.667     | X                         |
| Can-SemUSA        | 2            | 768.5       | X                         |
| In-AmCañSp        | 3            | 773.0       | X                         |
| In-CGBUSA         | 3            | 776.333     | X                         |
| Ag-WChInd         | 3            | 777.0       | X                         |
| In-PsPiñSp        | 3            | 779.333     | X                         |
| Flex-AryaInd      | 3            | 780.333     | X                         |
| Am-HassanTur      | 3            | 780.333     | X                         |
| La-KroFran        | 4            | 782.0       | X                         |

|               |   |         |   |
|---------------|---|---------|---|
| Ag-TendSud    | 3 | 785.667 | X |
| La-ZatIta     | 3 | 790.0   | X |
| La-ErizoSp    | 3 | 790.333 | X |
| Can-EanaHun   | 3 | 793.333 | X |
| Am-KizilUzbe  | 3 | 797.667 | X |
| Dud-QAPMGeorg | 3 | 804.667 | X |
| In-TeNinvSp   | 2 | 830.5   | X |
| Con-GMJa      | 3 | 831.667 | X |
| In-TeNinvSp2  | 2 | 837.0   | X |
| Can-DulUSA    | 3 | 839.333 | X |
| Can-VedFran   | 3 | 849.0   | X |
| Am-YokIs      | 2 | 866.0   | X |
| Can-NCFran    | 2 | 881.5   | X |
| Flex-Co20Ind  | 3 | 912.0   | X |
| Con-BaishChi  | 3 | 952.333 | X |
| Con-SCKo      | 3 | 956.333 | X |
| In-BBescrSp   | 3 | 1078.33 | X |
| Ac-G22843Se   | 3 | 1291.67 | X |
| chate-CarIta  | 1 | 1579.0  | X |
| In-TeSp       | 3 | 1776.67 | X |
| Can-HBJUSA    | 3 | 1965.67 | X |
| Mom-KhaInd    | 3 | 1995.67 | X |
| Can-WiUSA     | 3 | 2390.0  | X |
| Ag-15591Gha   | 3 | 35599.3 | X |
| La-CascaPor   | 2 | 129805. | X |

### LSD analysis for M.3 per accessions

Method: 95.0 percentage LSD

| <i>accessions</i> | <i>Cases</i> | <i>Mean</i> | <i>Homogeneous groups</i> |
|-------------------|--------------|-------------|---------------------------|
| Can-DulUSA        | 3            | 103706.     | X                         |
| La-CascaPor       | 2            | 105352.     | XXXX                      |
| Am-AnaFran        | 3            | 105790.     | XX                        |
| Am-TokTaj         | 3            | 108119.     | XXX                       |
| In-ComunSp        | 2            | 112083.     | XXXXXXX                   |
| Can-GCHUSA        | 3            | 114595.     | XXXXXX                    |
| Can-EfJa          | 3            | 116514.     | XXXXXXX                   |
| La-ErizoSp        | 3            | 116996.     | XXXXXXX                   |
| Can-HBJUSA        | 3            | 117583.     | XXXXXXX                   |
| Am-korcaRus       | 3            | 120589.     | XXXXXXXX                  |
| Ac-G22843Se       | 3            | 123726.     | XXXXXXXXXX                |
| Can-TopUSA        | 3            | 123728.     | XXXXXXXXXX                |
| In-LaBolasSp      | 3            | 123811.     | XXXXXXXXXX                |
| Ag-15591Gha       | 3            | 125419.     | XXXXXXXXXX                |
| Can-VedFran       | 3            | 125661.     | XXXXXXXXXX                |
| Can-SucrFran      | 3            | 127724.     | XXXXXXXXXX                |
| Mom-MR1Ind        | 3            | 129298.     | XXXXXXXXXX                |
| La-KroFran        | 4            | 129362.     | XXXXXXXXXX                |
| Can-WiUSA         | 3            | 131734.     | XXXXXXXXXX                |
| Tibish-Ksud       | 3            | 136904.     | XXXXXXXXXX                |
| In-BBescrSp       | 3            | 137116.     | XXXXXXXXXXXX              |
| In-TDewUSA        | 3            | 137328.     | XXXXXXXXXXXX              |
| La-OgenBul        | 3            | 138242.     | XXXXXXXXXXXX              |
| In-HoneyDewUSA    | 3            | 138641.     | XXXXXXXXXXXX              |
| Am-YokIs          | 2            | 139416.     | XXXXXXXXXXXX              |
| Can-SemUSA        | 2            | 139557.     | XXXXXXXXXXXX              |
| Am-KafEgy         | 2            | 140425.     | XXXXXXXXXXXX              |

|                |   |         |              |
|----------------|---|---------|--------------|
| Chi-VellInd    | 3 | 141191. | XXXXXXXXXXXX |
| Con-MielChi    | 3 | 142140. | XXXXXXXXXXXX |
| Can-GyFran     | 2 | 143493. | XXXXXXXXXXXX |
| Mom-PII24Ind   | 3 | 143647. | XXXXXXXXXXXX |
| Am-HassanTur   | 3 | 143952. | XXXXXXXXXXXX |
| In-BBredSp     | 3 | 144493. | XXXXXXXXXXXX |
| Ag-TendSud     | 3 | 144613. | XXXXXXXXXXXX |
| In-TeSp        | 3 | 145560. | XXXXXXXXXXXX |
| In-LaEscrSp    | 2 | 146135. | XXXXXXXXXXXX |
| In-TeNinvSp2   | 2 | 146651. | XXXXXXXXXXXX |
| Can-PGRFran    | 3 | 147414. | XXXXXXXXXXXX |
| Dud-QPMAfg     | 3 | 148368. | XXXXXXXXXXXX |
| In-CrabPor     | 2 | 148380. | XXXXXXXXXXXX |
| Can-Ogen2Is    | 3 | 150560. | XXXXXXXXXXXX |
| Am-KizilUzbe   | 3 | 152674. | XXXXXXXXXXXX |
| Can-NOFran     | 2 | 153044. | XXXXXXXXXXXX |
| Can-PearlJa    | 3 | 153095. | XXXXXXXXXXXX |
| Am-NesviGeor   | 3 | 153252. | XXXXXXXXXXXX |
| In-PsPiñSp     | 3 | 155635. | XXXXXXXXXXXX |
| Ag-CallInd     | 3 | 156244. | XXXXXXXXXXXX |
| In-RoMochISp   | 3 | 156563. | XXXXXXXXXXXX |
| Con-NanChi     | 3 | 157516. | XXXXXXXXXXXX |
| Can-EanaHun    | 3 | 160512. | XXXXXXXXXXXX |
| Mom-KhaInd     | 3 | 160642. | XXXXXXXXXXXX |
| In-AmCañSp     | 3 | 161054. | XXXXXXXXXXXX |
| Ac-SRKSLan     | 3 | 162050. | XXXXXXXXXXXX |
| Con-PauPol     | 3 | 162730. | XXXXXXXXXXXX |
| Ag-WChInd      | 3 | 163447. | XXXXXXXXXXXX |
| La-ZatIta      | 3 | 164828. | XXXXXXXXXXXX |
| Con-ShiroJa    | 3 | 167031. | XXXXXXXXXXXX |
| In-CGBUSA      | 3 | 168482. | XXXXXXXXXXXX |
| In-AmAoroSp    | 2 | 168607. | XXXXXXXXXXXX |
| Con-FreeCJa    | 3 | 169522. | XXXXXXXXXXXX |
| Dud-QAPMGeorg  | 3 | 170048. | XXXXXXXXXXXX |
| Ac-TGR1551Zimb | 3 | 172254. | XXXXXXXXXXXX |
| Can-NCFran     | 2 | 175650. | XXXXXXXXXXXX |
| In-TeNinvSp    | 2 | 176362. | XXXXXXXXXXXX |
| Flex-AryaInd   | 3 | 178054. | XXXXXXXXXXXX |
| Con-BaishChi   | 3 | 179378. | XXXXXXXXXXXX |
| Ac-SVIIInd     | 2 | 191592. | XXXXXXXXXXXX |
| Con-SCKo       | 3 | 192223. | XXXXXXXXXXXX |
| Con-GMJJa      | 3 | 194940. | XXXXXXXXXXXX |
| Flex-Co20Ind   | 3 | 202194. | XXXXXXXXXXXX |
| Flex-SnakeSA   | 3 | 213679. | XXXXXXXXXXXX |
| chate-CarlIta  | 1 | 230148. | XXXXXXXXXXXX |

#### LSD analysis for M.4 per accessions

Method: 95.0 percentage LSD

| <i>accessions</i> | <i>Cases</i> | <i>Mean</i> | <i>Homogeneous groups</i> |
|-------------------|--------------|-------------|---------------------------|
| La-KroFran        | 4            | 750.0       | X                         |
| In-TeNinvSp2      | 2            | 750.0       | X                         |
| Mom-MR1Ind        | 3            | 750.0       | X                         |
| Mom-PII24Ind      | 3            | 750.0       | X                         |
| In-TeSp           | 3            | 750.0       | X                         |
| Can-VedFran       | 3            | 750.0       | X                         |
| Ac-G22843Se       | 3            | 750.0       | X                         |

|                |   |         |    |
|----------------|---|---------|----|
| Am-AnaFran     | 3 | 750.0   | X  |
| Tibish-Ksud    | 3 | 750.0   | X  |
| Ac-SRKSLan     | 3 | 750.0   | X  |
| La-OgenBul     | 3 | 750.0   | X  |
| Con-BaishChi   | 3 | 750.0   | X  |
| La-ErizoSp     | 3 | 750.0   | X  |
| Ac-SVIIInd     | 2 | 750.0   | X  |
| Ac-TGR1551Zimb | 3 | 750.0   | X  |
| Ag-WChInd      | 3 | 750.0   | X  |
| Can-EanaHun    | 3 | 750.0   | X  |
| Can-EfJa       | 3 | 750.0   | X  |
| Can-GCHUSA     | 3 | 750.0   | X  |
| Am-HassanTur   | 3 | 750.0   | X  |
| Am-KafEgy      | 2 | 750.0   | X  |
| Can-NCFran     | 2 | 750.0   | X  |
| Can-NOFran     | 2 | 750.0   | X  |
| Am-KizilUzbe   | 3 | 750.0   | X  |
| Can-PGRFran    | 3 | 750.0   | X  |
| Can-PearlJa    | 3 | 750.0   | X  |
| Can-SemUSA     | 2 | 750.0   | X  |
| La-ZatIta      | 3 | 750.0   | X  |
| Ag-TendSud     | 3 | 750.0   | X  |
| Am-YokIs       | 2 | 750.0   | X  |
| Am-korcaRus    | 3 | 750.0   | X  |
| Chi-VellInd    | 3 | 750.0   | X  |
| Can-DulUSA     | 3 | 750.0   | X  |
| Con-FreeCJa    | 3 | 750.0   | X  |
| Con-GMJJa      | 3 | 750.0   | X  |
| Con-MielChi    | 3 | 750.0   | X  |
| Con-NanChi     | 3 | 750.0   | X  |
| Con-PauPol     | 3 | 750.0   | X  |
| Con-SCKo       | 3 | 750.0   | X  |
| Con-ShiroJa    | 3 | 750.0   | X  |
| Can-GyFran     | 2 | 750.0   | X  |
| Dud-QPMAfg     | 3 | 750.0   | X  |
| Flex-AryaInd   | 3 | 750.0   | X  |
| Flex-Co20Ind   | 3 | 750.0   | X  |
| Flex-SnakeSA   | 3 | 750.0   | X  |
| In-AmAoroSp    | 2 | 750.0   | X  |
| In-AmCañSp     | 3 | 750.0   | X  |
| In-BBescrSp    | 3 | 750.0   | X  |
| Can-Ogen2Is    | 3 | 750.0   | X  |
| In-CGBUSA      | 3 | 750.0   | X  |
| In-ComunSp     | 2 | 750.0   | X  |
| In-CrabPor     | 2 | 750.0   | X  |
| In-HoneyDewUSA | 3 | 750.0   | X  |
| In-LaBolasSp   | 3 | 750.0   | X  |
| In-LaEscrSp    | 2 | 750.0   | X  |
| In-PsPiñSp     | 3 | 750.0   | X  |
| In-RoMoch1Sp   | 3 | 750.0   | X  |
| chate-CarIta   | 1 | 750.0   | XX |
| In-TeNinvSp    | 2 | 750.0   | X  |
| Ag-CallInd     | 3 | 776.333 | X  |
| In-TDewUSA     | 3 | 1791.0  | X  |
| Can-SucrFran   | 3 | 1823.33 | X  |
| Am-NesviGeor   | 3 | 2353.33 | X  |
| Can-WiUSA      | 3 | 3843.0  | XX |

|               |   |         |    |
|---------------|---|---------|----|
| Am-TokTaj     | 3 | 4150.67 | XX |
| In-BBredSp    | 3 | 5511.33 | XX |
| Can-TopUSA    | 3 | 6285.67 | XX |
| Dud-QAPMGeorg | 3 | 6599.33 | XX |
| Can-HBJUSA    | 3 | 6679.33 | XX |
| Mom-KhaInd    | 3 | 11315.7 | X  |
| La-CascaPor   | 2 | 85366.0 | X  |
| Ag-15591Gha   | 3 | 148715. | X  |

#### LSD analysis for M.5 per accessions

Method: 95.0 percentage LSD

| <i>accessions</i> | <i>Cases</i> | <i>Mean</i> | <i>Homogeneous groups</i> |
|-------------------|--------------|-------------|---------------------------|
| In-LaBolasSp      | 3            | 750.0       | XX                        |
| In-PsPiñSp        | 3            | 750.0       | XX                        |
| Con-BaishChi      | 3            | 750.0       | XX                        |
| In-RoMoch1Sp      | 3            | 750.0       | XX                        |
| In-TeNinvSp2      | 2            | 750.0       | XXX                       |
| In-TeNinvSp       | 2            | 750.0       | XXX                       |
| La-ErizoSp        | 3            | 750.0       | XX                        |
| Mom-PII24Ind      | 3            | 750.0       | XX                        |
| Mom-MR1Ind        | 3            | 750.0       | XX                        |
| In-TDewUSA        | 3            | 750.0       | XX                        |
| Am-KizilUzbe      | 3            | 750.0       | XX                        |
| La-KroFran        | 4            | 750.0       | X                         |
| Can-VedFran       | 3            | 750.0       | XX                        |
| Am-YokIs          | 2            | 750.0       | XXX                       |
| La-OgenBul        | 3            | 750.0       | XX                        |
| Con-GMJJa         | 3            | 750.0       | XX                        |
| Tibish-Ksud       | 3            | 750.0       | XX                        |
| Am-AnaFran        | 3            | 750.0       | XX                        |
| Can-GCHUSA        | 3            | 750.0       | XX                        |
| Am-HassanTur      | 3            | 750.0       | XX                        |
| Ac-SRKSLan        | 3            | 750.0       | XX                        |
| Can-NCFran        | 2            | 750.0       | XXX                       |
| Can-NOFran        | 2            | 750.0       | XXX                       |
| Can-Ogen2Is       | 3            | 750.0       | XX                        |
| Ag-CallInd        | 3            | 750.0       | XX                        |
| Can-PearlJa       | 3            | 750.0       | XX                        |
| La-ZatlIta        | 3            | 750.0       | XX                        |
| Can-SucrFran      | 3            | 750.0       | XX                        |
| Ag-TendSud        | 3            | 750.0       | XX                        |
| Ac-SVIInd         | 2            | 750.0       | XXX                       |
| Am-korcaRus       | 3            | 750.0       | XX                        |
| Ag-WChInd         | 3            | 750.0       | XX                        |
| Ac-TGR1551Zimb    | 3            | 750.0       | XX                        |
| Con-FreeCJa       | 3            | 750.0       | XX                        |
| Can-EanaHun       | 3            | 750.0       | XX                        |
| Con-MielChi       | 3            | 750.0       | XX                        |
| Con-NanChi        | 3            | 750.0       | XX                        |
| Con-PauPol        | 3            | 750.0       | XX                        |
| Con-SCKo          | 3            | 750.0       | XX                        |
| Con-ShiroJa       | 3            | 750.0       | XX                        |
| Can-GyFran        | 2            | 750.0       | XXX                       |
| Dud-QPMAfg        | 3            | 750.0       | XX                        |
| Am-KafEgy         | 2            | 750.0       | XXX                       |
| Flex-Co20Ind      | 3            | 750.0       | XX                        |



|                |   |         |      |
|----------------|---|---------|------|
| Flex-SnakeSA   | 3 | 750.0   | XX   |
| In-AmAoroSp    | 2 | 750.0   | XXX  |
| In-AmCañSp     | 3 | 750.0   | XX   |
| In-BBescrSp    | 3 | 750.0   | XX   |
| In-BBredSp     | 3 | 750.0   | XX   |
| In-CGBUSA      | 3 | 750.0   | XX   |
| In-ComunSp     | 2 | 750.0   | XXX  |
| Can-PGRFran    | 3 | 750.0   | XX   |
| In-HoneyDewUSA | 3 | 750.0   | XX   |
| Chi-VellInd    | 3 | 775.667 | XX   |
| Flex-AryaInd   | 3 | 1501.33 | XXX  |
| In-TeSp        | 3 | 1626.33 | XXX  |
| Dud-QAPMGeorg  | 3 | 1650.67 | XXX  |
| Can-DulUSA     | 3 | 2004.67 | XXX  |
| In-CrabPor     | 2 | 2589.0  | XXX  |
| Am-TokTaj      | 3 | 2666.67 | XXX  |
| In-LaEscrSp    | 2 | 2682.0  | XXX  |
| Am-NesviGeor   | 3 | 3525.67 | XXX  |
| chate-CarIta   | 1 | 4906.0  | XXXX |
| Ac-G22843Se    | 3 | 5251.67 | XXXX |
| Can-HBJUSA     | 3 | 5840.67 | XXXX |
| Can-SemUSA     | 2 | 6756.5  | XXXX |
| Can-TopUSA     | 3 | 7313.0  | XXX  |
| Can-EfJa       | 3 | 7776.33 | XX   |
| Mom-KhaInd     | 3 | 11602.7 | X    |
| Can-WiUSA      | 3 | 11774.7 | X    |
| Ag-15591Gha    | 3 | 156409. | X    |
| La-CascaPor    | 2 | 183472. | X    |

#### LSD analysis for 0.1 per accessions

Method: 95.0 percentage LSD

| <i>accessions</i> | <i>Cases</i> | <i>Mean</i> | <i>Homogeneous groups</i> |
|-------------------|--------------|-------------|---------------------------|
| Con-SCKo          | 3            | 793.333     | X                         |
| Ac-TGR1551Zimb    | 3            | 794.0       | X                         |
| Con-ShiroJa       | 3            | 797.0       | X                         |
| Con-PauPol        | 3            | 855.0       | X                         |
| Flex-Co20Ind      | 3            | 855.333     | X                         |
| In-AmAoroSp       | 2            | 1064.0      | XXX                       |
| Con-FreeCJa       | 3            | 5632.67     | XX                        |
| Can-SucrFran      | 3            | 6300.67     | XX                        |
| Am-HassanTur      | 3            | 8285.67     | XX                        |
| Flex-SnakeSA      | 3            | 12046.7     | XXX                       |
| Can-EanaHun       | 3            | 22641.3     | XXXX                      |
| Am-korcaRus       | 3            | 27851.3     | XXXXX                     |
| Tibish-Ksud       | 3            | 33198.3     | XXXXXX                    |
| Dud-QAPMGeorg     | 3            | 34803.0     | XXXXXX                    |
| La-ZatIta         | 3            | 34946.0     | XXXXXX                    |
| Am-YokIs          | 2            | 37362.5     | XXXXXXXX                  |
| Am-NesviGeor      | 3            | 39959.3     | XXXXXXXX                  |
| Ag-15591Gha       | 3            | 42605.7     | XXXXXXXX                  |
| In-LaEscrSp       | 2            | 42606.0     | XXXXXXXXXX                |
| Con-MielChi       | 3            | 43871.3     | XXXXXXXXXX                |
| Con-NanChi        | 3            | 45504.3     | XXXXXXXXXX                |
| In-BBescrSp       | 3            | 52086.7     | XXXXXXXXXX                |
| La-KroFran        | 4            | 52425.3     | XXXXXXXXXX                |
| Can-GyFran        | 2            | 52953.5     | XXXXXXXXXX                |

|                |   |         |              |
|----------------|---|---------|--------------|
| chate-Carlta   | 1 | 58571.0 | XXXXXXXXXXXX |
| In-TDewUSA     | 3 | 58600.7 | XXXXXXXXXXXX |
| In-AmCañSp     | 3 | 59025.3 | XXXXXXXXXXXX |
| Can-NOFran     | 2 | 59198.5 | XXXXXXXXXXXX |
| Mom-MRIInd     | 3 | 59379.0 | XXXXXXXXXXXX |
| La-CascaPor    | 2 | 61301.5 | XXXXXXXXXXXX |
| Am-TokTaj      | 3 | 62051.3 | XXXXXXXXXXXX |
| Can-PGRFran    | 3 | 66091.7 | XXXXXXXXXXXX |
| In-BBredSp     | 3 | 66936.7 | XXXXXXXXXXXX |
| In-ComunSp     | 2 | 68597.0 | XXXXXXXXXXXX |
| In-PsPiñSp     | 3 | 68619.3 | XXXXXXXXXXXX |
| Flex-AryaInd   | 3 | 68869.0 | XXXXXXXXXXXX |
| Am-AnaFran     | 3 | 71750.3 | XXXXXXXXXXXX |
| In-CrabPor     | 2 | 74447.5 | XXXXXXXXXXXX |
| La-OgenBul     | 3 | 74680.0 | XXXXXXXXXXXX |
| Dud-QPMAfg     | 3 | 75278.0 | XXXXXXXXXXXX |
| Can-DulUSA     | 3 | 80824.0 | XXXXXXXXXXXX |
| In-LaBolasSp   | 3 | 81523.7 | XXXXXXXXXXXX |
| In-CGBUSA      | 3 | 83086.0 | XXXXXXXXXXXX |
| Can-SemUSA     | 2 | 83233.5 | XXXXXXXXXXXX |
| Can-WiUSA      | 3 | 83586.7 | XXXXXXXXXXXX |
| Ag-TendSud     | 3 | 85007.7 | XXXXXXXXXXXX |
| Ag-WChInd      | 3 | 86681.7 | XXXXXXXXXXXX |
| Can-NCFran     | 2 | 87799.0 | XXXXXXXXXXXX |
| Am-KizilUzbe   | 3 | 91921.7 | XXXXXXXXXXXX |
| Can-Ogen2Is    | 3 | 94461.0 | XXXXXXXXXXXX |
| In-HoneyDewUSA | 3 | 98090.3 | XXXXXXXXXXXX |
| Can-EfJa       | 3 | 107593. | XXXXXXX      |
| Can-GCHUSA     | 3 | 108352. | XXXXXXX      |
| Ag-CallInd     | 3 | 108618. | XXXXXXX      |
| La-ErizoSp     | 3 | 108940. | XXXXXXX      |
| Can-VedFran    | 3 | 110289. | XXXXXXX      |
| Can-PearlJa    | 3 | 111487. | XXXXXXX      |
| In-TeNinvSp2   | 2 | 112169. | XXXXXXXXXX   |
| Can-HBJUSA     | 3 | 118345. | XXXXXXX      |
| In-RoMoch1Sp   | 3 | 119143. | XXXXXXX      |
| Ac-SRKSLan     | 3 | 119883. | XXXXXXX      |
| Mom-KhaInd     | 3 | 120857. | XXXXXXX      |
| Ac-G22843Se    | 3 | 120925. | XXXXXXX      |
| Con-GMJJa      | 3 | 123334. | XXXXXXX      |
| Con-BaishChi   | 3 | 131750. | XXXXXX       |
| Can-TopUSA     | 3 | 133338. | XXXXX        |
| Am-KafEgy      | 2 | 140940. | XXXXXX       |
| Mom-PII24Ind   | 3 | 142264. | XXX          |
| In-TeSp        | 3 | 143448. | XXX          |
| In-TeNinvSp    | 2 | 144196. | XXXX         |
| Ac-SVIIInd     | 2 | 155945. | XX           |
| Chi-VellInd    | 3 | 164525. | X            |

#### LSD analysis for 0.2 per accessions

Method: 95.0 percentage LSD

| <i>accessions</i> | <i>Cases</i> | <i>Mean</i> | <i>Homogeneous groups</i> |
|-------------------|--------------|-------------|---------------------------|
| Can-NCFran        | 2            | 750.0       | xxx                       |
| In-AmAoroSp       | 2            | 750.0       | xxx                       |
| Ac-SRKSLan        | 3            | 750.0       | x                         |
| Tibish-Ksud       | 3            | 750.0       | x                         |

|                |   |         |            |
|----------------|---|---------|------------|
| In-RoMoch1Sp   | 3 | 750.0   | X          |
| In-PsPiñSp     | 3 | 750.0   | X          |
| Con-FreeCJa    | 3 | 750.0   | X          |
| chate-CarIta   | 1 | 750.0   | XXXXXXX    |
| In-HoneyDewUSA | 3 | 750.0   | X          |
| In-CGBUSA      | 3 | 750.0   | X          |
| Ac-TGR1551Zimb | 3 | 756.333 | X          |
| Flex-Co20Ind   | 3 | 758.667 | X          |
| Ac-SVIInd      | 2 | 811.0   | XXX        |
| Ag-15591Gha    | 3 | 816.0   | X          |
| Ag-TendSud     | 3 | 863.667 | X          |
| Flex-SnakeSA   | 3 | 1895.67 | XX         |
| In-CrabPor     | 2 | 2024.0  | XXX        |
| Mom-KhaInd     | 3 | 4076.0  | XX         |
| Con-MielChi    | 3 | 4283.67 | XX         |
| Ag-WChInd      | 3 | 4536.67 | XX         |
| Chi-VellInd    | 3 | 6689.67 | XX         |
| Con-GMJJa      | 3 | 10476.3 | XX         |
| In-BBredSp     | 3 | 10863.7 | XX         |
| Ac-G22843Se    | 3 | 11062.7 | XX         |
| Con-PauPol     | 3 | 12362.3 | XX         |
| In-TeNinvSp    | 2 | 12881.5 | XXX        |
| In-BBscrSp     | 3 | 13771.0 | XX         |
| Con-ShiroJa    | 3 | 16068.3 | XX         |
| Con-NanChi     | 3 | 20002.7 | XXX        |
| In-LaEscrSp    | 2 | 35398.0 | XXX        |
| Can-WiUSA      | 3 | 35617.3 | XXX        |
| Can-SucrFran   | 3 | 43312.0 | XXX        |
| Con-SCKo       | 3 | 48400.0 | XXX        |
| Am-HassanTur   | 3 | 50363.0 | XXX        |
| Dud-QPMAfg     | 3 | 51071.0 | XXX        |
| Con-BaishChi   | 3 | 56728.3 | XXX        |
| Can-HBJUSA     | 3 | 57617.7 | XXX        |
| In-TDewUSA     | 3 | 60882.7 | XXX        |
| Am-TokTaj      | 3 | 63171.7 | XXX        |
| La-CascaPor    | 2 | 67530.0 | XXXX X     |
| Ag-CallInd     | 3 | 68498.7 | XXX        |
| Can-EanaHun    | 3 | 80973.0 | XXXX       |
| Can-GyFran     | 2 | 82824.0 | XXXX X     |
| Can-PGRFran    | 3 | 91914.0 | XXXX       |
| Am-KizilUzbe   | 3 | 122822. | XXXX X     |
| Am-KafEgy      | 2 | 131670. | XXXXXX     |
| Mom-PII24Ind   | 3 | 139656. | XXXX X     |
| Can-SemUSA     | 2 | 146254. | XXXXXX     |
| Can-TopUSA     | 3 | 153044. | XXXXXX     |
| Can-DulUSA     | 3 | 154048. | XXXXXX     |
| In-LaBolasSp   | 3 | 211513. | XXXXXX     |
| In-ComunSp     | 2 | 212241. | XXXXXXX    |
| Am-korcaRus    | 3 | 213008. | XXXXXX     |
| La-ErizoSp     | 3 | 226179. | XXXXXX     |
| La-KroFran     | 4 | 246853. | XXXXXX     |
| In-AmCañSp     | 3 | 251320. | XXXXXX     |
| Can-Ogen2Is    | 3 | 276684. | XXXXXXXX   |
| La-ZatIta      | 3 | 286617. | XXXXXXXX   |
| Am-AnaFran     | 3 | 293378. | XXXXXXXX   |
| Can-VedFran    | 3 | 335711. | XXXXXXXXXX |
| Flex-AryaInd   | 3 | 356060. | XXXXXXXXXX |

|               |   |           |            |
|---------------|---|-----------|------------|
| Can-PearlJa   | 3 | 367777.   | XXXXXXXXXX |
| Can-EfJa      | 3 | 408597.   | XXXXXXXXXX |
| Dud-QAPMGeorg | 3 | 426391.   | XXXXXXXXXX |
| Can-NOFran    | 2 | 534011.   | XXXXXXX    |
| Mom-MRIInd    | 3 | 555764.   | X XXX      |
| Am-YokIs      | 2 | 565265.   | XXXXXX     |
| Can-GCHUSA    | 3 | 661053.   | XXX        |
| In-TeSp       | 3 | 683167.   | XX         |
| Am-NesviGeor  | 3 | 716284.   | X          |
| La-OgenBul    | 3 | 1.16405E6 | X          |
| In-TeNinvSp2  | 2 | 1.35768E6 | X          |

### LSD analysis for 0.3 per accessions

Method: 95.0 percentage LSD

| <i>accessions</i> | <i>Cases</i> | <i>Mean</i> | <i>Homogeneous groups</i> |
|-------------------|--------------|-------------|---------------------------|
| Ac-SRKSLan        | 3            | 750.0       | X                         |
| Ac-SVIInd         | 2            | 750.0       | XX                        |
| chate-Carlta      | 1            | 750.0       | XXX                       |
| Con-GMJJa         | 3            | 771.333     | X                         |
| In-CrabPor        | 2            | 781.5       | XX                        |
| In-AmAoroSp       | 2            | 788.5       | XX                        |
| Con-SCKo          | 3            | 807.333     | X                         |
| In-PsPiñSp        | 3            | 819.333     | X                         |
| In-CGBUSA         | 3            | 882.333     | X                         |
| Con-ShiroJa       | 3            | 2046.33     | X                         |
| Con-FreeCJa       | 3            | 2373.67     | X                         |
| In-RoMoch1Sp      | 3            | 2503.67     | X                         |
| In-HoneyDewUSA    | 3            | 2672.33     | X                         |
| Flex-Co20Ind      | 3            | 3005.33     | X                         |
| In-AmCañSp        | 3            | 3051.67     | X                         |
| Flex-SnakeSA      | 3            | 3257.67     | X                         |
| Con-BaishChi      | 3            | 3322.67     | X                         |
| Ac-TGR1551Zimb    | 3            | 4381.0      | X                         |
| Ag-WChInd         | 3            | 4749.67     | X                         |
| Tibish-Ksud       | 3            | 9114.67     | X                         |
| In-BBredSp        | 3            | 12180.3     | XX                        |
| In-TeNinvSp2      | 2            | 12206.0     | XX                        |
| Dud-QPMAfg        | 3            | 14585.0     | XX                        |
| Con-NanChi        | 3            | 15075.0     | XX                        |
| Con-MielChi       | 3            | 15550.7     | XX                        |
| Ac-G22843Se       | 3            | 20690.7     | XX                        |
| In-LaEscrSp       | 2            | 23391.5     | XX                        |
| Can-WiUSA         | 3            | 24376.3     | XX                        |
| Ag-CallInd        | 3            | 26049.7     | XX                        |
| In-TeSp           | 3            | 33269.3     | XX                        |
| Can-EanaHun       | 3            | 34347.7     | XX                        |
| La-ZatIta         | 3            | 35925.7     | XX                        |
| Can-NCFran        | 2            | 44691.0     | XX                        |
| Can-GCHUSA        | 3            | 53890.3     | XX                        |
| Am-KizilUzbe      | 3            | 64996.7     | XX                        |
| Can-GyFran        | 2            | 65152.0     | XX                        |
| Can-SucrFran      | 3            | 90636.3     | XX                        |
| In-TeNinvSp       | 2            | 95583.0     | XX                        |
| Can-NOFran        | 2            | 105089.     | XX                        |
| Can-Ogen2Is       | 3            | 105829.     | XX                        |
| Can-VedFran       | 3            | 106198.     | XX                        |

|               |   |           |        |
|---------------|---|-----------|--------|
| Can-PearlJa   | 3 | 108045.   | XX     |
| Can-TopUSA    | 3 | 111692.   | XX     |
| Can-DulUSA    | 3 | 117831.   | XX     |
| Con-PauPol    | 3 | 125696.   | XX     |
| Can-HBJUSA    | 3 | 139052.   | XX     |
| La-CascaPor   | 2 | 154899.   | XXXX   |
| Can-EfJa      | 3 | 188734.   | XXX    |
| In-TDewUSA    | 3 | 198230.   | XXX    |
| Ag-15591Gha   | 3 | 201676.   | XXX    |
| Am-NesviGeor  | 3 | 251061.   | XXXX   |
| Chi-VellInd   | 3 | 251739.   | XXXX   |
| La-KroFran    | 4 | 252468.   | XXXX   |
| Am-AnaFran    | 3 | 265795.   | XXXX   |
| Am-HassanTur  | 3 | 268423.   | XXXX   |
| Flex-AryaInd  | 3 | 276560.   | XXXX   |
| In-ComunSp    | 2 | 321146.   | XXXXXX |
| La-OgenBul    | 3 | 345478.   | XXXXXX |
| Mom-PII24Ind  | 3 | 349563.   | XXXXXX |
| In-BBescrSp   | 3 | 354275.   | XXXXXX |
| In-LaBolasSp  | 3 | 384305.   | XXXXXX |
| Can-SemUSA    | 2 | 395909.   | XXXXXX |
| La-ErizoSp    | 3 | 403388.   | XXXXXX |
| Can-PGRFran   | 3 | 411134.   | XXXXXX |
| Dud-QAPMGeorg | 3 | 415658.   | XXXXXX |
| Mom-KhaInd    | 3 | 470805.   | XXXXXX |
| Am-korcaRus   | 3 | 633930.   | XXXXXX |
| Ag-TendSud    | 3 | 667191.   | XXXX   |
| Am-YokIs      | 2 | 828303.   | XXX    |
| Am-KafEgy     | 2 | 965979.   | XX     |
| Am-TokTaj     | 3 | 1.05957E6 | X      |
| Mom-MR1Ind    | 3 | 1.84382E6 | X      |

#### LSD analysis for 0.4 per accessions

Method: 95.0 percentage LSD

| <i>accessions</i> | <i>Cases</i> | <i>Mean</i> | <i>Homogeneous groups</i> |
|-------------------|--------------|-------------|---------------------------|
| Ac-TGR1551Zimb    | 3            | 750.0       | X                         |
| Con-GMJJa         | 3            | 750.0       | X                         |
| In-PsPiñSp        | 3            | 750.0       | X                         |
| In-RoMoch1Sp      | 3            | 750.0       | X                         |
| Flex-Co20Ind      | 3            | 750.0       | X                         |
| In-HoneyDewUSA    | 3            | 750.0       | X                         |
| Con-FreeCJa       | 3            | 750.0       | X                         |
| Ac-SRKSLan        | 3            | 750.0       | X                         |
| Ac-SVIInd         | 2            | 750.0       | X                         |
| chate-CarIta      | 1            | 750.0       | XXXXXX                    |
| In-AmAoroSp       | 2            | 750.0       | X                         |
| In-CGBUSA         | 3            | 1408.33     | X                         |
| Con-BaishChi      | 3            | 1661.33     | X                         |
| Con-ShiroJa       | 3            | 1788.67     | X                         |
| In-CrabPor        | 2            | 2184.0      | X                         |
| Ag-WChInd         | 3            | 2270.0      | X                         |
| Tibish-Ksud       | 3            | 3106.33     | X                         |
| Con-SCKo          | 3            | 3269.33     | X                         |
| In-AmCañSp        | 3            | 3513.33     | X                         |
| Flex-SnakeSA      | 3            | 3991.33     | X                         |
| In-BBredSp        | 3            | 5762.67     | X                         |

|               |   |         |            |
|---------------|---|---------|------------|
| Con-NanChi    | 3 | 5980.67 | X          |
| In-TeNinvSp2  | 2 | 6867.5  | X          |
| In-LaEscrSp   | 2 | 7216.5  | XX         |
| Con-MielChi   | 3 | 8595.67 | X          |
| Can-WiUSA     | 3 | 12999.0 | X          |
| Ac-G22843Se   | 3 | 13922.0 | X          |
| Can-GCHUSA    | 3 | 16810.7 | X          |
| In-TeSp       | 3 | 18215.3 | X          |
| Can-NCFran    | 2 | 18462.0 | XXX        |
| Con-PauPol    | 3 | 23222.3 | X          |
| Dud-QPMAfg    | 3 | 25704.3 | X          |
| Ag-CallInd    | 3 | 26198.3 | X          |
| Can-Ogen2Is   | 3 | 26198.7 | X          |
| In-TeNinvSp   | 2 | 31280.0 | XXXX       |
| La-CascaPor   | 2 | 32242.5 | XXXX       |
| Am-AnaFran    | 3 | 37121.7 | XXX        |
| Ag-15591Gha   | 3 | 41987.7 | XXX        |
| La-ZatIta     | 3 | 42237.0 | XXX        |
| Can-HBJUSA    | 3 | 48031.0 | XXXX       |
| In-TDewUSA    | 3 | 48833.3 | XXXX       |
| Can-NOFran    | 2 | 50247.0 | XXXXXX     |
| Can-GyFran    | 2 | 50650.0 | XXXXXXXX   |
| Can-TopUSA    | 3 | 52842.3 | XXXX       |
| Can-DulUSA    | 3 | 53401.7 | XXXX       |
| Am-KizilUzbe  | 3 | 68623.0 | XXXXXX     |
| Can-SucrFran  | 3 | 73589.7 | XXXXXXXX   |
| Can-SemUSA    | 2 | 74311.0 | XXXXXXXX   |
| La-OgenBul    | 3 | 74606.3 | XXXXXXXX   |
| La-ErizoSp    | 3 | 75111.7 | XXXXXXXX   |
| La-KroFran    | 4 | 76600.5 | XXXXXX     |
| Can-VedFran   | 3 | 98244.7 | XXXXXXXX   |
| Am-HassanTur  | 3 | 108408. | XXXXXXXX   |
| Mom-KhaInd    | 3 | 111599. | XXXXXXXX   |
| In-ComunSp    | 2 | 113693. | XXXXXXXX   |
| Am-KafEgy     | 2 | 118805. | XXXXXXXXXX |
| Can-EfJa      | 3 | 121777. | XXXXXXXX   |
| Ag-TendSud    | 3 | 134200. | XXXXXXXX   |
| Dud-QAPMGeorg | 3 | 135597. | XXXXXXXX   |
| Am-korcaRus   | 3 | 152811. | XXXXXXXXXX |
| Can-EanaHun   | 3 | 156169. | XXXXXXXXXX |
| Can-PearlJa   | 3 | 160956. | XXXXXXXXXX |
| Chi-VellInd   | 3 | 163953. | XXXXXXXXXX |
| Can-PGRFran   | 3 | 210094. | XXXXXXXX   |
| Am-NesviGeor  | 3 | 214161. | XXXXXXXX   |
| Mom-PII24Ind  | 3 | 229321. | XXXXXX     |
| In-LaBolasSp  | 3 | 240742. | XXXXXX     |
| In-BBescrSp   | 3 | 251928. | XXXX       |
| Am-TokTaj     | 3 | 258093. | XXX        |
| Flex-AryaInd  | 3 | 321406. | X          |
| Am-YokIs      | 2 | 333407. | XX         |
| Mom-MRIInd    | 3 | 649852. | X          |

#### LSD analysis for 0.5 per accessions

Method: 95.0 percentage LSD

| <i>accessions</i> | <i>Cases</i> | <i>Mean</i> | <i>Homogeneous groups</i> |
|-------------------|--------------|-------------|---------------------------|
| Con-NanChi        | 3            | 750.0       | X                         |

|                |   |         |        |
|----------------|---|---------|--------|
| Con-SCKo       | 3 | 750.0   | X      |
| Con-PauPol     | 3 | 750.0   | X      |
| Dud-QPMafg     | 3 | 750.0   | X      |
| Flex-SnakeSA   | 3 | 750.0   | X      |
| Con-ShiroJa    | 3 | 750.0   | X      |
| Flex-Co20Ind   | 3 | 750.0   | X      |
| In-RoMoch1Sp   | 3 | 750.0   | X      |
| In-HoneyDewUSA | 3 | 750.0   | X      |
| Ac-SVIIInd     | 2 | 750.0   | XX     |
| In-LaEscrSp    | 2 | 750.0   | XX     |
| Tibish-Ksud    | 3 | 750.0   | X      |
| Con-FreeCJa    | 3 | 750.0   | X      |
| Ag-15591Gha    | 3 | 750.0   | X      |
| In-AmCañSp     | 3 | 750.0   | X      |
| In-BBredSp     | 3 | 750.0   | X      |
| Am-AnaFran     | 3 | 750.0   | X      |
| Ac-SRKSLan     | 3 | 750.0   | X      |
| Can-GCHUSA     | 3 | 750.0   | X      |
| In-TeNinvSp    | 2 | 750.0   | XX     |
| Ag-CallInd     | 3 | 750.0   | X      |
| Can-NCFran     | 2 | 750.0   | XX     |
| La-CascaPor    | 2 | 750.0   | XX     |
| Can-Ogen2Is    | 3 | 750.0   | X      |
| In-TeNinvSp2   | 2 | 750.0   | XX     |
| chate-CarIta   | 1 | 750.0   | XXXXXX |
| In-PsPiñSp     | 3 | 750.0   | X      |
| In-CrabPor     | 2 | 750.0   | XX     |
| In-AmAoroSp    | 2 | 750.0   | XX     |
| Ac-TGR1551Zimb | 3 | 750.0   | X      |
| In-CGBUSA      | 3 | 750.0   | X      |
| Con-BaishChi   | 3 | 750.0   | X      |
| Ac-G22843Se    | 3 | 750.0   | X      |
| Ag-WChInd      | 3 | 750.0   | X      |
| Con-GMJJa      | 3 | 750.0   | X      |
| Con-MielChi    | 3 | 750.0   | X      |
| Can-WiUSA      | 3 | 5116.0  | X      |
| Can-HBJUSA     | 3 | 6438.33 | X      |
| Can-TopUSA     | 3 | 7134.33 | XX     |
| In-TDewUSA     | 3 | 8774.33 | XX     |
| In-TeSp        | 3 | 13426.0 | XXX    |
| Can-DulUSA     | 3 | 19200.3 | XXXX   |
| La-OgenBul     | 3 | 19712.0 | XXXX   |
| La-ZatIta      | 3 | 20864.0 | XXXX   |
| Can-SemUSA     | 2 | 24292.5 | XXXX   |
| Am-KizilUzbe   | 3 | 27221.0 | XXXX   |
| Dud-QAPMGeorg  | 3 | 28322.0 | XXXX   |
| La-ErizoSp     | 3 | 29479.7 | XXXX   |
| Can-EfJa       | 3 | 30777.3 | XXXX   |
| Am-KafEgy      | 2 | 35847.5 | XXXXXX |
| Can-SucrFran   | 3 | 40034.7 | XXXXXX |
| Am-NesviGeor   | 3 | 48114.0 | XXXXXX |
| Can-GyFran     | 2 | 49123.5 | XXXXXX |
| La-KroFran     | 4 | 49624.5 | XXXXXX |
| Am-TokTaj      | 3 | 59822.0 | XXXXXX |
| Ag-TendSud     | 3 | 62250.3 | XXXXXX |
| Flex-AryaInd   | 3 | 64472.7 | XXXXXX |
| Am-korcaRus    | 3 | 66066.7 | XXXXXX |

|              |   |         |         |
|--------------|---|---------|---------|
| In-BBescrSp  | 3 | 66079.7 | XXXXXX  |
| In-ComunSp   | 2 | 69536.5 | XXXXXXX |
| Am-HassanTur | 3 | 74494.7 | XXXXXXX |
| Am-YokIs     | 2 | 80894.5 | XXXXXXX |
| Chi-VellInd  | 3 | 81562.3 | XXXXXXX |
| In-LaBolasSp | 3 | 86124.3 | XXXXXXX |
| Can-PearlJa  | 3 | 103215. | XXXXXX  |
| Can-VedFran  | 3 | 109300. | XXXX    |
| Mom-KhaInd   | 3 | 115255. | XXX     |
| Can-NOFran   | 2 | 120149. | XXXX    |
| Mom-PII24Ind | 3 | 134691. | XX      |
| Can-EanaHun  | 3 | 164509. | XX      |
| Can-PGRFran  | 3 | 234408. | X       |
| Mom-MR1Ind   | 3 | 358787. | X       |

#### LSD analysis for 0.6 per accessions

Method: 95.0 percentage LSD

| <i>accessions</i> | <i>Cases</i> | <i>Mean</i> | <i>Homogeneous groups</i> |
|-------------------|--------------|-------------|---------------------------|
| Can-GyFran        | 2            | 750.0       | X                         |
| Mom-PII24Ind      | 3            | 750.0       | X                         |
| Can-DulUSA        | 3            | 750.0       | X                         |
| Con-MielChi       | 3            | 5072.0      | X                         |
| In-BBredSp        | 3            | 5085.67     | X                         |
| In-TDewUSA        | 3            | 5689.33     | X                         |
| Can-Ogen2Is       | 3            | 6394.33     | X                         |
| Ac-SRKSLan        | 3            | 6431.0      | X                         |
| Dud-QAPMGeorg     | 3            | 7741.67     | X                         |
| In-TeNinvSp2      | 2            | 8753.5      | XX                        |
| Can-HBJUSA        | 3            | 8911.33     | X                         |
| Can-WiUSA         | 3            | 9839.33     | X                         |
| Chi-VellInd       | 3            | 10835.7     | X                         |
| Am-AnaFran        | 3            | 11613.3     | X                         |
| Am-HassanTur      | 3            | 11863.0     | X                         |
| Can-VedFran       | 3            | 12226.0     | X                         |
| Can-PearlJa       | 3            | 12660.0     | X                         |
| Can-SucrFran      | 3            | 13216.0     | X                         |
| Mom-MR1Ind        | 3            | 13420.0     | X                         |
| Can-NOFran        | 2            | 13577.5     | XXX                       |
| Con-FreeCJa       | 3            | 14457.7     | X                         |
| La-OgenBul        | 3            | 15536.7     | XX                        |
| In-TeNinvSp       | 2            | 16042.0     | XXX                       |
| In-LaEscrSp       | 2            | 17211.0     | XXX                       |
| In-PsPiñSp        | 3            | 17964.0     | XX                        |
| Ac-G22843Se       | 3            | 18583.0     | XX                        |
| Ac-TGR1551Zimb    | 3            | 20507.0     | XXX                       |
| Can-NCFran        | 2            | 20763.5     | XXXX                      |
| In-RoMoch1Sp      | 3            | 21005.0     | XXX                       |
| In-TeSp           | 3            | 21518.7     | XXX                       |
| La-ErizoSp        | 3            | 22066.7     | XXX                       |
| In-CGBUSA         | 3            | 22682.0     | XXX                       |
| Am-YokIs          | 2            | 22931.5     | XXXXXX                    |
| Con-GMJJa         | 3            | 23502.0     | XXX                       |
| Con-BaishChi      | 3            | 23781.7     | XXX                       |
| Ac-SVIIInd        | 2            | 24304.5     | XXXXXX                    |
| Am-NesviGeor      | 3            | 24391.3     | XXX                       |
| In-LaBolasSp      | 3            | 25868.3     | XXX                       |



|                |   |           |          |
|----------------|---|-----------|----------|
| Can-EanaHun    | 3 | 26760.7   | xxx      |
| Dud-QPMAfg     | 3 | 26942.3   | xxx      |
| In-CrabPor     | 2 | 27330.5   | xxxxxx   |
| In-HoneyDewUSA | 3 | 28923.3   | xxx      |
| Con-NanChi     | 3 | 29706.0   | xxxx     |
| Am-KafEgy      | 2 | 31506.5   | xxxxxxx  |
| Am-korcaRus    | 3 | 31953.7   | xxxx     |
| In-BBescrSp    | 3 | 32460.7   | xxxx     |
| Con-SCKo       | 3 | 33014.3   | xxxxxx   |
| Tibish-Ksud    | 3 | 34250.7   | xxxxxx   |
| La-CascaPor    | 2 | 34393.5   | xxxxxxx  |
| La-KroFran     | 4 | 35519.0   | xxxx     |
| Ag-CallInd     | 3 | 37649.7   | xxxxxx   |
| chate-Carlta   | 1 | 37862.0   | xxxxxxxx |
| Flex-Co20Ind   | 3 | 41489.3   | xxxxxx   |
| Can-SemUSA     | 2 | 49717.0   | xxxxxxxx |
| Am-KizilUzbe   | 3 | 49813.0   | xxxxxxxx |
| Flex-SnakeSA   | 3 | 51938.0   | xxxxxxxx |
| In-AmCañSp     | 3 | 54012.0   | xxxxxxxx |
| Flex-AryaInd   | 3 | 57973.0   | xxxxxxxx |
| Can-EfJa       | 3 | 59275.7   | xxxxxxxx |
| Am-TokTaj      | 3 | 64923.0   | xxxxxxxx |
| La-Zatlta      | 3 | 66965.7   | xxxxxxxx |
| Con-PauPol     | 3 | 68860.3   | xxxxxxxx |
| Mom-KhaInd     | 3 | 71283.7   | xxxxxxxx |
| Can-GCHUSA     | 3 | 116996.   | xxxxxxx  |
| In-ComunSp     | 2 | 123115.   | xxxxxxxx |
| Can-TopUSA     | 3 | 125872.   | xxxxxx   |
| Can-PGRFran    | 3 | 129438.   | xxxx     |
| Ag-WChInd      | 3 | 138343.   | xxx      |
| In-AmAoroSp    | 2 | 179991.   | xx       |
| Con-ShiroJa    | 3 | 210795.   | xx       |
| Ag-TendSud     | 3 | 304878.   | x        |
| Ag-15591Gha    | 3 | 1.10096E6 | x        |

#### LSD analysis for 0.7 per accessions

Method: 95.0 percentage LSD

| <i>accessions</i> | <i>Cases</i> | <i>Mean</i> | <i>Homogeneous groups</i> |
|-------------------|--------------|-------------|---------------------------|
| In-PsPiñSp        | 3            | 750.0       | x                         |
| Can-PearlJa       | 3            | 750.0       | x                         |
| Can-SucrFran      | 3            | 750.0       | x                         |
| La-CascaPor       | 2            | 750.0       | x                         |
| La-KroFran        | 4            | 750.0       | x                         |
| In-LaEscrSp       | 2            | 750.0       | x                         |
| In-TeNinvSp2      | 2            | 750.0       | x                         |
| In-TeNinvSp       | 2            | 750.0       | x                         |
| Con-BaishChi      | 3            | 750.0       | x                         |
| Can-DulUSA        | 3            | 750.0       | x                         |
| Ag-CallInd        | 3            | 750.0       | x                         |
| chate-Carlta      | 1            | 750.0       | x                         |
| Ac-SVInd          | 2            | 750.0       | x                         |
| In-RoMoch1Sp      | 3            | 750.0       | x                         |
| Can-VedFran       | 3            | 750.0       | x                         |
| Mom-PII24Ind      | 3            | 750.0       | x                         |
| Can-EanaHun       | 3            | 750.0       | x                         |
| Am-AnaFran        | 3            | 750.0       | x                         |

|                |   |         |     |
|----------------|---|---------|-----|
| Ac-SRKSLan     | 3 | 750.0   | X   |
| Can-GyFran     | 2 | 750.0   | X   |
| Con-FreeCJa    | 3 | 750.0   | X   |
| Can-NCFran     | 2 | 750.0   | X   |
| Can-NOFran     | 2 | 750.0   | X   |
| Can-Ogen2Is    | 3 | 750.0   | X   |
| Can-PGRFran    | 3 | 750.0   | X   |
| Am-NesviGeor   | 3 | 750.0   | X   |
| Can-SemUSA     | 2 | 750.0   | X   |
| Am-TokTaj      | 3 | 750.0   | X   |
| Can-TopUSA     | 3 | 750.0   | X   |
| Am-YokIs       | 2 | 750.0   | X   |
| La-OgenBul     | 3 | 750.0   | X   |
| Chi-VellInd    | 3 | 750.0   | X   |
| La-ZatIta      | 3 | 750.0   | X   |
| Ac-TGR1551Zimb | 3 | 750.0   | X   |
| Con-GMJJa      | 3 | 750.0   | X   |
| Con-MielChi    | 3 | 750.0   | X   |
| Con-NanChi     | 3 | 750.0   | X   |
| Con-PauPol     | 3 | 750.0   | X   |
| Con-SCKo       | 3 | 750.0   | X   |
| Con-ShiroJa    | 3 | 750.0   | X   |
| Dud-QAPMGeorg  | 3 | 750.0   | X   |
| Dud-QPMAfg     | 3 | 750.0   | X   |
| Can-HBJUSA     | 3 | 750.0   | X   |
| Flex-Co20Ind   | 3 | 750.0   | X   |
| Flex-SnakeSA   | 3 | 750.0   | X   |
| In-AmAoroSp    | 2 | 750.0   | X   |
| In-AmCañSp     | 3 | 750.0   | X   |
| In-BBescrSp    | 3 | 750.0   | X   |
| In-BBredSp     | 3 | 750.0   | X   |
| In-CGBUSA      | 3 | 750.0   | X   |
| In-ComunSp     | 2 | 750.0   | X   |
| In-CrabPor     | 2 | 750.0   | X   |
| In-HoneyDewUSA | 3 | 750.0   | X   |
| In-TeSp        | 3 | 1409.0  | X   |
| In-TDewUSA     | 3 | 1585.67 | X   |
| Can-EfJa       | 3 | 1712.0  | X   |
| In-LaBolasSp   | 3 | 2319.0  | X   |
| Can-WiUSA      | 3 | 2379.67 | X   |
| Mom-MR1Ind     | 3 | 2420.33 | X   |
| La-ErizoSp     | 3 | 2872.67 | X   |
| Am-HassanTur   | 3 | 3428.0  | X   |
| Ac-G22843Se    | 3 | 3758.67 | X   |
| Am-korcaRus    | 3 | 4422.33 | X   |
| Am-KizilUzbe   | 3 | 7330.33 | X   |
| Tibish-Ksud    | 3 | 7463.33 | X   |
| Flex-AryaInd   | 3 | 8279.67 | X   |
| Am-KafEgy      | 2 | 8599.5  | XX  |
| Mom-KhaInd     | 3 | 16251.3 | XXX |
| Can-GCHUSA     | 3 | 27524.0 | XX  |
| Ag-WChInd      | 3 | 30964.7 | X   |
| Ag-TendSud     | 3 | 87017.3 | X   |
| Ag-15591Gha    | 3 | 214423. | X   |

LSD analysis for 0.8 per accessions

Method: 95.0 percentage LSD

| <i>accessions</i> | <i>Cases</i> | <i>Mean</i> | <i>Homogeneous groups</i> |
|-------------------|--------------|-------------|---------------------------|
| Con-NanChi        | 3            | 750.0       | X                         |
| Ag-WChInd         | 3            | 750.0       | X                         |
| In-PsPiñSp        | 3            | 750.0       | X                         |
| Ac-SRKSLan        | 3            | 750.0       | X                         |
| Con-GMJJa         | 3            | 750.0       | X                         |
| Con-ShiroJa       | 3            | 750.0       | X                         |
| In-HoneyDewUSA    | 3            | 750.0       | X                         |
| Flex-Co20Ind      | 3            | 750.0       | X                         |
| In-AmAoroSp       | 2            | 750.0       | XX                        |
| In-CGBUSA         | 3            | 750.0       | X                         |
| Can-EanaHun       | 3            | 750.0       | X                         |
| Con-SCKo          | 3            | 750.0       | X                         |
| Dud-QPMAfg        | 3            | 750.0       | X                         |
| Flex-SnakeSA      | 3            | 750.0       | X                         |
| In-TeNinvSp       | 2            | 750.0       | XX                        |
| In-LaEscrSp       | 2            | 750.0       | XX                        |
| Tibish-Ksud       | 3            | 750.0       | X                         |
| Con-FreeCJa       | 3            | 750.0       | X                         |
| Can-GCHUSA        | 3            | 750.0       | X                         |
| In-TeNinvSp2      | 2            | 750.0       | XX                        |
| In-CrabPor        | 2            | 750.0       | XX                        |
| Can-NCFran        | 2            | 750.0       | XX                        |
| Can-WiUSA         | 3            | 750.0       | X                         |
| Am-KizilUzbe      | 3            | 750.0       | X                         |
| In-RoMoch1Sp      | 3            | 750.0       | X                         |
| La-ZatIta         | 3            | 750.0       | X                         |
| chate-CarIta      | 1            | 750.0       | XXXX                      |
| Ac-SVIIInd        | 2            | 750.0       | XX                        |
| In-AmCañSp        | 3            | 750.0       | X                         |
| Con-BaishChi      | 3            | 750.0       | X                         |
| Ac-G22843Se       | 3            | 750.0       | X                         |
| In-TeSp           | 3            | 750.0       | X                         |
| Ac-TGR1551Zimb    | 3            | 750.0       | X                         |
| In-BBredSp        | 3            | 757.333     | X                         |
| Ag-CallInd        | 3            | 772.667     | X                         |
| Can-PearlJa       | 3            | 796.0       | X                         |
| Con-MielChi       | 3            | 797.667     | X                         |
| Can-GyFran        | 2            | 889.0       | XX                        |
| Can-SucrFran      | 3            | 3404.0      | X                         |
| Can-TopUSA        | 3            | 4320.33     | X                         |
| Con-PauPol        | 3            | 5222.33     | X                         |
| Can-NOFran        | 2            | 5325.0      | XXX                       |
| La-CascaPor       | 2            | 7177.0      | XXX                       |
| Flex-AryaInd      | 3            | 10156.7     | XX                        |
| Can-VedFran       | 3            | 10440.7     | XX                        |
| Can-DulUSA        | 3            | 10546.7     | XX                        |
| Can-Ogen2Is       | 3            | 12826.3     | XXX                       |
| In-TDewUSA        | 3            | 13794.3     | XXX                       |
| Can-HBJUSA        | 3            | 14904.3     | XXX                       |
| Ag-15591Gha       | 3            | 15837.0     | XXXX                      |
| Am-NesviGeor      | 3            | 18042.3     | XXXX                      |
| Am-AnaFran        | 3            | 18988.7     | XXXX                      |
| Chi-VellInd       | 3            | 21279.0     | XXXX                      |
| Can-EfJa          | 3            | 24338.3     | XXXX                      |
| La-KroFran        | 4            | 24952.3     | XXXX                      |

|               |   |         |      |
|---------------|---|---------|------|
| Dud-QAPMGeorg | 3 | 26177.0 | XXXX |
| Mom-KhaInd    | 3 | 28019.0 | XXXX |
| Can-SemUSA    | 2 | 28483.5 | XXXX |
| Am-HassanTur  | 3 | 28551.3 | XXXX |
| La-OgenBul    | 3 | 30426.7 | XXXX |
| Mom-PII24Ind  | 3 | 30726.3 | XXXX |
| Ag-TendSud    | 3 | 31932.0 | XXXX |
| In-LaBolasSp  | 3 | 32136.3 | XXXX |
| Am-KafEgy     | 2 | 47359.0 | XXXX |
| La-ErizoSp    | 3 | 51372.0 | XXXX |
| Can-PGRFran   | 3 | 66499.7 | XXXX |
| Am-korcaRus   | 3 | 81212.7 | XXX  |
| In-BBescrSp   | 3 | 85270.0 | XX   |
| In-ComunSp    | 2 | 98779.0 | X    |
| Am-YokIs      | 2 | 210906. | X    |
| Am-TokTaj     | 3 | 227420. | X    |
| Mom-MR1Ind    | 3 | 262549. | X    |

#### LSD analysis for 0.9 per accessions

Method: 95.0 percentage LSD

| <i>accessions</i> | <i>Cases</i> | <i>Mean</i> | <i>Homogeneous groups</i> |
|-------------------|--------------|-------------|---------------------------|
| In-HoneyDewUSA    | 3            | 750.0       | XX                        |
| Am-NesviGeor      | 3            | 750.0       | XX                        |
| Ac-G22843Se       | 3            | 750.0       | XX                        |
| In-TeNinvSp       | 2            | 750.0       | XX                        |
| In-CrabPor        | 2            | 750.0       | XX                        |
| In-LaEscrSp       | 2            | 750.0       | XX                        |
| In-RoMoch1Sp      | 3            | 750.0       | XX                        |
| Ac-SVIIInd        | 2            | 750.0       | XX                        |
| Ag-15591Gha       | 3            | 750.0       | XX                        |
| Am-KafEgy         | 2            | 750.0       | XX                        |
| In-TeNinvSp2      | 2            | 750.0       | XX                        |
| In-PsPiñSp        | 3            | 750.0       | XX                        |
| Can-SucrFran      | 3            | 750.0       | XX                        |
| Can-WiUSA         | 3            | 750.0       | XX                        |
| La-OgenBul        | 3            | 750.0       | XX                        |
| Ac-SRKSLan        | 3            | 750.0       | XX                        |
| Can-DulUSA        | 3            | 750.0       | XX                        |
| Can-EfJa          | 3            | 750.0       | XX                        |
| Can-GCHUSA        | 3            | 750.0       | XX                        |
| Can-GyFran        | 2            | 750.0       | XX                        |
| Can-HBJUSA        | 3            | 750.0       | XX                        |
| Can-NCFran        | 2            | 750.0       | XX                        |
| Con-FreeCJa       | 3            | 750.0       | XX                        |
| Can-Ogen2Is       | 3            | 750.0       | XX                        |
| La-CascaPor       | 2            | 750.0       | XX                        |
| Con-BaishChi      | 3            | 750.0       | XX                        |
| Can-SemUSA        | 2            | 750.0       | XX                        |
| La-ZatIta         | 3            | 750.0       | XX                        |
| Can-TopUSA        | 3            | 750.0       | XX                        |
| Am-korcaRus       | 3            | 750.0       | XX                        |
| Tibish-Ksud       | 3            | 750.0       | XX                        |
| chate-CarIta      | 1            | 750.0       | XX                        |
| Ac-TGR1551Zimb    | 3            | 750.0       | XX                        |
| Ag-WChInd         | 3            | 750.0       | XX                        |
| Am-AnaFran        | 3            | 750.0       | XX                        |

|               |   |         |     |
|---------------|---|---------|-----|
| Con-MielChi   | 3 | 750.0   | XX  |
| Con-NanChi    | 3 | 750.0   | XX  |
| Con-PauPol    | 3 | 750.0   | XX  |
| Con-SCKo      | 3 | 750.0   | XX  |
| Con-ShiroJa   | 3 | 750.0   | XX  |
| Dud-QAPMGeorg | 3 | 750.0   | XX  |
| Dud-QPMAfg    | 3 | 750.0   | XX  |
| Flex-AryaInd  | 3 | 750.0   | XX  |
| Flex-Co20Ind  | 3 | 750.0   | XX  |
| Flex-SnakeSA  | 3 | 750.0   | XX  |
| In-AmAoroSp   | 2 | 750.0   | XX  |
| In-AmCañSp    | 3 | 750.0   | XX  |
| Am-KizilUzbe  | 3 | 750.0   | XX  |
| In-BBredSp    | 3 | 750.0   | XX  |
| In-CGBUSA     | 3 | 750.0   | XX  |
| Ag-CallInd    | 3 | 750.667 | XX  |
| Ag-TendSud    | 3 | 780.667 | XX  |
| La-KroFran    | 4 | 807.25  | X   |
| Con-GMJJa     | 3 | 833.0   | XX  |
| In-BBescrSp   | 3 | 856.667 | XX  |
| Am-YokIs      | 2 | 871.5   | XX  |
| Am-HassanTur  | 3 | 885.0   | XX  |
| In-LaBolasSp  | 3 | 925.333 | XX  |
| Chi-VellInd   | 3 | 1075.33 | XX  |
| Can-PearlJa   | 3 | 1089.33 | XX  |
| Can-EanaHun   | 3 | 1275.0  | XX  |
| Can-VedFran   | 3 | 2109.33 | XX  |
| Am-TokTaj     | 3 | 3151.0  | XX  |
| In-TeSp       | 3 | 4582.0  | XX  |
| La-ErizoSp    | 3 | 5747.67 | XX  |
| Can-NOFran    | 2 | 6208.5  | XX  |
| Mom-KhaInd    | 3 | 6640.33 | XX  |
| In-ComunSp    | 2 | 6824.5  | XX  |
| Can-PGRFran   | 3 | 8787.67 | XXX |
| Mom-PII24Ind  | 3 | 9417.67 | XX  |
| Mom-MR1Ind    | 3 | 17653.3 | X   |
| In-TDewUSA    | 3 | 36934.0 | X   |

#### LSD analysis for 0.10 per accessions

Method: 95.0 percentage LSD

| <i>accessions</i> | <i>Cases</i> | <i>Mean</i> | <i>Homogeneous groups</i> |
|-------------------|--------------|-------------|---------------------------|
| Con-SCKo          | 3            | 750.0       | XX                        |
| Can-GyFran        | 2            | 750.0       | XX                        |
| Flex-Co20Ind      | 3            | 750.0       | XX                        |
| Con-ShiroJa       | 3            | 750.0       | XX                        |
| Dud-QPMAfg        | 3            | 750.0       | XX                        |
| Can-HBJUSA        | 3            | 750.0       | XX                        |
| La-CascaPor       | 2            | 750.0       | XX                        |
| In-PsPiñSp        | 3            | 750.0       | XX                        |
| Can-Ogen2Is       | 3            | 750.0       | XX                        |
| In-AmCañSp        | 3            | 750.0       | XX                        |
| In-AmAoroSp       | 2            | 750.0       | XX                        |
| Tibish-Ksud       | 3            | 750.0       | XX                        |
| Flex-SnakeSA      | 3            | 750.0       | XX                        |
| Ag-CallInd        | 3            | 750.0       | XX                        |
| La-KroFran        | 4            | 750.0       | X                         |

|                |   |         |        |
|----------------|---|---------|--------|
| Ag-WChInd      | 3 | 750.0   | XX     |
| Ac-TGR1551Zimb | 3 | 750.0   | XX     |
| Ac-G22843Se    | 3 | 750.0   | XX     |
| Can-GCHUSA     | 3 | 750.0   | XX     |
| Ag-15591Gha    | 3 | 750.0   | XX     |
| chate-CarIta   | 1 | 750.0   | XXX    |
| Can-NCFran     | 2 | 750.0   | XX     |
| In-CrabPor     | 2 | 750.0   | XX     |
| In-HoneyDewUSA | 3 | 750.0   | XX     |
| In-RoMoch1Sp   | 3 | 750.0   | XX     |
| La-ErizoSp     | 3 | 750.0   | XX     |
| In-LaEscrSp    | 2 | 750.0   | XX     |
| In-TeNinvSp    | 2 | 750.0   | XX     |
| Ac-SVIIInd     | 2 | 750.0   | XX     |
| In-TeNinvSp2   | 2 | 750.0   | XX     |
| Can-WiUSA      | 3 | 750.0   | XX     |
| Con-BaishChi   | 3 | 750.0   | XX     |
| Con-FreeCJa    | 3 | 750.0   | XX     |
| Ac-SRKSLan     | 3 | 750.0   | XX     |
| Con-GMJJa      | 3 | 750.0   | XX     |
| Con-MielChi    | 3 | 750.0   | XX     |
| Con-NanChi     | 3 | 750.0   | XX     |
| Con-PauPol     | 3 | 750.0   | XX     |
| In-TDewUSA     | 3 | 815.0   | XX     |
| Can-EfJa       | 3 | 859.333 | XX     |
| In-TeSp        | 3 | 870.667 | XX     |
| Can-SucrFran   | 3 | 921.667 | XX     |
| Can-SemUSA     | 2 | 1004.5  | XXX    |
| Dud-QAPMGeorg  | 3 | 1074.33 | XX     |
| Am-NesviGeor   | 3 | 1169.67 | XX     |
| Am-KizilUzbe   | 3 | 1219.67 | XX     |
| Am-KafEgy      | 2 | 1260.0  | XXX    |
| Can-VedFran    | 3 | 1382.0  | XXX    |
| Flex-AryaInd   | 3 | 1435.0  | XXX    |
| Am-korcaRus    | 3 | 1467.0  | XXX    |
| In-BBescrSp    | 3 | 1545.33 | XXX    |
| In-ComunSp     | 2 | 1551.0  | XXX    |
| Am-TokTaj      | 3 | 1594.67 | XXX    |
| Ag-TendSud     | 3 | 1606.67 | XXX    |
| In-LaBolasSp   | 3 | 1691.33 | XXX    |
| Am-HassanTur   | 3 | 1699.67 | XXX    |
| Can-NOFran     | 2 | 1720.5  | XXXX   |
| Mom-KhaInd     | 3 | 1988.33 | XXX    |
| Am-YokIs       | 2 | 2112.0  | XXXXXX |
| Can-PearlJa    | 3 | 2164.0  | XXXXXX |
| In-CGBUSA      | 3 | 2357.67 | XXXXXX |
| La-ZatIta      | 3 | 2376.33 | XXXXXX |
| In-BBredSp     | 3 | 2662.33 | XXXXXX |
| Mom-PII24Ind   | 3 | 2674.67 | XXXXXX |
| Can-PGRFran    | 3 | 2762.33 | XXXXXX |
| Can-TopUSA     | 3 | 2803.33 | XXXXXX |
| Chi-VellInd    | 3 | 3391.33 | XXXXXX |
| La-OgenBul     | 3 | 3979.0  | XXXX   |
| Can-DulUSA     | 3 | 4696.0  | XXX    |
| Can-EanaHun    | 3 | 4740.33 | XX     |
| Mom-MR1Ind     | 3 | 5309.33 | X      |
| Am-AnaFran     | 3 | 13456.7 | X      |

# **LSD analysis for 0.11 per accessions**

Method: 95.0 percentage LSD

| <i>accessions</i> | <i>Cases</i> | <i>Mean</i> | <i>Homogeneous groups</i> |
|-------------------|--------------|-------------|---------------------------|
| Can-SemUSA        | 2            | 750.0       | XX                        |
| Con-GMJJa         | 3            | 1356.33     | X                         |
| Chi-VellInd       | 3            | 1636.33     | X                         |
| Ac-G22843Se       | 3            | 1829.0      | X                         |
| Con-SCKo          | 3            | 1924.0      | XX                        |
| Con-BaishChi      | 3            | 2374.67     | XX                        |
| In-TeNinvSp2      | 2            | 2449.0      | XX                        |
| Ag-TendSud        | 3            | 2955.0      | XX                        |
| In-CrabPor        | 2            | 3046.0      | XX                        |
| chate-CarIta      | 1            | 3425.0      | XX                        |
| Can-HBJUSA        | 3            | 4138.67     | XX                        |
| Mom-PII24Ind      | 3            | 4349.67     | XX                        |
| Can-EanaHun       | 3            | 4441.33     | XX                        |
| Ag-CallInd        | 3            | 4520.0      | XX                        |
| Ag-15591Gha       | 3            | 4606.67     | XX                        |
| La-ErizoSp        | 3            | 4658.0      | XX                        |
| Con-MielChi       | 3            | 4787.0      | XX                        |
| Can-PearlJa       | 3            | 4857.0      | XX                        |
| Con-ShiroJa       | 3            | 5146.67     | XX                        |
| Can-TopUSA        | 3            | 5416.67     | XX                        |
| Am-KizilUzbe      | 3            | 5514.33     | XX                        |
| Can-DulUSA        | 3            | 5792.33     | XX                        |
| In-BBescrSp       | 3            | 5957.0      | XX                        |
| Flex-Co20Ind      | 3            | 6248.67     | XX                        |
| In-CGBUSA         | 3            | 6401.33     | XX                        |
| In-HoneyDewUSA    | 3            | 6677.33     | XX                        |
| Dud-QPMAfg        | 3            | 6694.67     | XX                        |
| Ag-WChInd         | 3            | 6724.0      | XX                        |
| Can-EfJa          | 3            | 6953.0      | XX                        |
| Flex-SnakeSA      | 3            | 6997.33     | XX                        |
| In-RoMochISp      | 3            | 7159.67     | XX                        |
| In-BBredSp        | 3            | 7161.0      | XX                        |
| La-OgenBul        | 3            | 7208.0      | XX                        |
| Am-TokTaj         | 3            | 7217.67     | XX                        |
| In-TDewUSA        | 3            | 7282.33     | XX                        |
| Can-GyFran        | 2            | 7414.0      | XX                        |
| Am-HassanTur      | 3            | 7509.67     | XX                        |
| Con-FreeCJa       | 3            | 7585.0      | XX                        |
| Ac-SVIInd         | 2            | 7862.0      | XX                        |
| Ac-SRKSLan        | 3            | 8218.33     | XX                        |
| In-LaEscrSp       | 2            | 8257.5      | XX                        |
| Can-WiUSA         | 3            | 8296.0      | XX                        |
| Can-NCFran        | 2            | 8566.0      | XX                        |
| In-AmAoroSp       | 2            | 8641.5      | XX                        |
| Am-AnaFran        | 3            | 8653.67     | XX                        |
| In-AmCañSp        | 3            | 8712.67     | XX                        |
| Tibish-Ksud       | 3            | 8877.33     | XX                        |
| In-TeNinvSp       | 2            | 8958.0      | XX                        |
| Am-korcaRus       | 3            | 9385.0      | XX                        |
| Can-VedFran       | 3            | 9719.33     | XX                        |
| Con-PauPol        | 3            | 9785.33     | XX                        |
| Con-NanChi        | 3            | 9988.33     | XX                        |

|                |   |         |    |
|----------------|---|---------|----|
| In-ComunSp     | 2 | 10126.0 | XX |
| Ac-TGR1551Zimb | 3 | 10135.7 | XX |
| In-PsPiñSp     | 3 | 10779.7 | XX |
| La-KroFran     | 4 | 11139.3 | XX |
| Am-KafEgy      | 2 | 11363.0 | XX |
| Dud-QAPMGeorg  | 3 | 11736.0 | XX |
| Can-Ogen2Is    | 3 | 12000.3 | XX |
| In-LaBolasSp   | 3 | 12665.7 | XX |
| Am-NesviGeor   | 3 | 12796.0 | XX |
| Can-PGRFran    | 3 | 13309.0 | XX |
| Mom-MR1Ind     | 3 | 13897.0 | XX |
| Mom-KhaInd     | 3 | 14405.3 | XX |
| La-CascaPor    | 2 | 17013.0 | XX |
| Can-GCHUSA     | 3 | 20358.3 | XX |
| In-TeSp        | 3 | 21128.0 | XX |
| Can-SucrFran   | 3 | 25158.7 | XX |
| Am-YokIs       | 2 | 26313.5 | XX |
| Flex-AryaInd   | 3 | 34984.3 | X  |
| Can-NOFran     | 2 | 36517.5 | XX |
| La-ZatIta      | 3 | 160461. | X  |

#### LSD analysis for O.12 per accessions

Method: 95.0 percentage LSD

| <i>accessions</i> | <i>Cases</i> | <i>Mean</i> | <i>Homogeneous groups</i> |
|-------------------|--------------|-------------|---------------------------|
| Am-YokIs          | 2            | 750.0       | XX                        |
| Con-MielChi       | 3            | 2708.67     | X                         |
| La-CascaPor       | 2            | 3805.0      | XXX                       |
| Can-SemUSA        | 2            | 3879.0      | XXX                       |
| Ac-SV1Ind         | 2            | 4847.0      | XXX                       |
| In-TeNinvSp2      | 2            | 5397.0      | XXX                       |
| Can-DulUSA        | 3            | 5602.67     | X                         |
| Am-KizilUzbe      | 3            | 6345.0      | X                         |
| Am-AnaFran        | 3            | 6695.67     | X                         |
| Can-EfJa          | 3            | 8104.0      | XX                        |
| Can-VedFran       | 3            | 8970.67     | XX                        |
| Dud-QPMAfg        | 3            | 9089.67     | XX                        |
| Con-GMJJa         | 3            | 9269.33     | XX                        |
| Can-TopUSA        | 3            | 9927.67     | XX                        |
| Can-GCHUSA        | 3            | 10181.0     | XX                        |
| La-ErizoSp        | 3            | 10309.7     | XX                        |
| La-OgenBul        | 3            | 10581.0     | XX                        |
| Chi-VellInd       | 3            | 10623.3     | XX                        |
| Am-korcaRus       | 3            | 12058.0     | XX                        |
| Mom-PII24Ind      | 3            | 12120.7     | XX                        |
| In-ComunSp        | 2            | 12638.0     | XXXX                      |
| Can-HBJUSA        | 3            | 12791.0     | XXX                       |
| In-RoMoch1Sp      | 3            | 13539.7     | XXX                       |
| In-TeNinvSp       | 2            | 13766.5     | XXXX                      |
| In-LaEscrSp       | 2            | 13860.0     | XXXX                      |
| Can-NOFran        | 2            | 16077.0     | XXXX                      |
| Ac-SRKSLan        | 3            | 17092.0     | XXX                       |
| Can-WiUSA         | 3            | 18413.3     | XXX                       |
| In-LaBolasSp      | 3            | 19460.0     | XXX                       |
| Con-BaishChi      | 3            | 19720.7     | XXX                       |
| Con-ShiroJa       | 3            | 20469.7     | XXX                       |
| Can-PGRFran       | 3            | 21910.7     | XXX                       |



|                |   |         |          |
|----------------|---|---------|----------|
| Dud-QAPMGeorg  | 3 | 22120.3 | XXX      |
| Flex-SnakeSA   | 3 | 22675.3 | XXXX     |
| Mom-MR1Ind     | 3 | 22905.3 | XXXX     |
| Con-PauPol     | 3 | 23897.7 | XXXX     |
| Am-HassanTur   | 3 | 25339.7 | XXXX     |
| Ag-15591Gha    | 3 | 26341.0 | XXXXX    |
| Am-NesviGeor   | 3 | 26401.3 | XXXXX    |
| Can-GyFran     | 2 | 28090.0 | XXXXX    |
| La-ZatIta      | 3 | 28459.7 | XXXXX    |
| Can-Ogen2Is    | 3 | 29994.3 | XXXXX    |
| Am-TokTaj      | 3 | 30059.0 | XXXXX    |
| Can-SucrFran   | 3 | 31918.0 | XXXXX    |
| Am-KafEgy      | 2 | 38220.5 | XXXXXX   |
| Can-PearlJa    | 3 | 40390.7 | XXXXXX   |
| In-BBescrSp    | 3 | 43695.0 | XXXXXX   |
| chate-CarIta   | 1 | 45524.0 | XXXXXXXX |
| Con-SCKo       | 3 | 47730.3 | XXXXXXXX |
| Con-NanChi     | 3 | 48456.0 | XXXXXXXX |
| Ag-CallInd     | 3 | 48507.3 | XXXXXXXX |
| Tibish-Ksud    | 3 | 55402.3 | XXXXXXXX |
| In-PsPiñSp     | 3 | 55719.0 | XXXXXXXX |
| Ac-TGR1551Zimb | 3 | 57819.7 | XXXXXXXX |
| In-AmAoroSp    | 2 | 57972.5 | XXXXXXXX |
| Flex-AryaInd   | 3 | 59747.7 | XXXXXXXX |
| Can-NCFran     | 2 | 64630.0 | XXXXXXXX |
| Ag-TendSud     | 3 | 67105.3 | XXXXXXXX |
| Ag-WChInd      | 3 | 68544.3 | XXXXXXXX |
| In-AmCañSp     | 3 | 77188.3 | XXXXXXXX |
| Mom-KhaInd     | 3 | 82783.0 | XXXXXXXX |
| La-KroFran     | 4 | 83218.5 | XXXXXXXX |
| In-CGBUSA      | 3 | 93677.3 | XXXXXXXX |
| In-TeSp        | 3 | 103598. | XXXXXX   |
| In-HoneyDewUSA | 3 | 107710. | XXXXX    |
| Can-EanaHun    | 3 | 119890. | XXXX     |
| In-CrabPor     | 2 | 140377. | XXX      |
| Ac-G22843Se    | 3 | 145085. | XX       |
| Con-FreeCJa    | 3 | 147650. | XX       |
| In-BBredSp     | 3 | 161828. | X        |
| Flex-Co20Ind   | 3 | 279991. | X        |
| In-TDewUSA     | 3 | 287230. | X        |

#### LSD analysis for 0.13 per accessions

Method: 95.0 percentage LSD

| <i>accessions</i> | <i>Cases</i> | <i>Mean</i> | <i>Homogeneous groups</i> |
|-------------------|--------------|-------------|---------------------------|
| Flex-Co20Ind      | 3            | 750.0       | XX                        |
| Can-GyFran        | 2            | 750.0       | XX                        |
| In-AmAoroSp       | 2            | 750.0       | XX                        |
| Can-NCFran        | 2            | 750.0       | XX                        |
| Can-HBJUSA        | 3            | 750.0       | XX                        |
| In-BBredSp        | 3            | 750.0       | XX                        |
| In-CrabPor        | 2            | 750.0       | XX                        |
| In-BBescrSp       | 3            | 750.0       | XX                        |
| In-AmCañSp        | 3            | 750.0       | XX                        |
| Ac-SVIIInd        | 2            | 750.0       | XX                        |
| Can-DulUSA        | 3            | 750.0       | XX                        |
| In-HoneyDewUSA    | 3            | 750.0       | XX                        |

|                |   |         |        |
|----------------|---|---------|--------|
| Can-Ogen2Is    | 3 | 750.0   | XX     |
| chate-Carlta   | 1 | 750.0   | XXXXX  |
| In-LaEscrSp    | 2 | 750.0   | XX     |
| In-PsPiñSp     | 3 | 750.0   | XX     |
| Can-EanaHun    | 3 | 750.0   | XX     |
| Can-EfJa       | 3 | 750.0   | XX     |
| Can-SucrFran   | 3 | 750.0   | XX     |
| Can-PearlJa    | 3 | 750.0   | XX     |
| Tibish-Ksud    | 3 | 750.0   | XX     |
| La-OgenBul     | 3 | 750.0   | XX     |
| Can-NOFran     | 2 | 750.0   | XX     |
| In-RoMoch1Sp   | 3 | 750.0   | XX     |
| In-TeNinvSp2   | 2 | 750.0   | XX     |
| Con-BaishChi   | 3 | 750.0   | XX     |
| Can-SemUSA     | 2 | 750.0   | XX     |
| In-TeNinvSp    | 2 | 750.0   | XX     |
| Can-TopUSA     | 3 | 750.0   | XX     |
| La-ErizoSp     | 3 | 750.0   | XX     |
| Con-FreeCJa    | 3 | 750.0   | XX     |
| Chi-VellInd    | 3 | 750.0   | XX     |
| Ac-TGR1551Zimb | 3 | 750.0   | XX     |
| La-KroFran     | 4 | 750.0   | X      |
| Con-GMJJa      | 3 | 750.0   | XX     |
| Con-MielChi    | 3 | 750.0   | XX     |
| Con-NanChi     | 3 | 750.0   | XX     |
| Con-PauPol     | 3 | 750.0   | XX     |
| Con-SCKo       | 3 | 750.0   | XX     |
| Con-ShiroJa    | 3 | 750.0   | XX     |
| Dud-QAPMGeorg  | 3 | 750.0   | XX     |
| Ag-CallInd     | 3 | 839.333 | XX     |
| In-TDewUSA     | 3 | 862.667 | XX     |
| Dud-QPMAfg     | 3 | 1612.33 | XX     |
| Am-AnaFran     | 3 | 1646.33 | XX     |
| Ac-SRKSLan     | 3 | 1889.67 | XX     |
| La-ZatIta      | 3 | 2380.33 | XX     |
| Mom-PII24Ind   | 3 | 3726.0  | XX     |
| Am-TokTaj      | 3 | 4835.0  | XX     |
| Can-PGRFran    | 3 | 4901.0  | XX     |
| In-CGBUSA      | 3 | 4962.33 | XX     |
| Am-HassanTur   | 3 | 5710.33 | XX     |
| Am-NesviGeor   | 3 | 5756.33 | XX     |
| Mom-MR1Ind     | 3 | 6319.0  | XX     |
| Can-WiUSA      | 3 | 8301.0  | XXX    |
| Flex-SnakeSA   | 3 | 8458.33 | XXX    |
| Can-VedFran    | 3 | 8719.67 | XXXXX  |
| Am-KafEgy      | 2 | 8986.5  | XXXXX  |
| In-ComunSp     | 2 | 9651.0  | XXXXX  |
| La-CascaPor    | 2 | 9885.5  | XXXXX  |
| In-TeSp        | 3 | 11861.3 | XXXXX  |
| Am-korcaRus    | 3 | 13044.7 | XXXXX  |
| In-LaBolasSp   | 3 | 13821.3 | XXXXX  |
| Flex-AryaInd   | 3 | 27602.0 | XXXXXX |
| Mom-KhaInd     | 3 | 36228.3 | XXXXXX |
| Ag-WChInd      | 3 | 44296.7 | XXXXX  |
| Am-KizilUzbe   | 3 | 44857.3 | XXX    |
| Am-YokIs       | 2 | 47766.5 | XXXXX  |
| Ac-G22843Se    | 3 | 57111.7 | XXX    |

|             |   |         |    |
|-------------|---|---------|----|
| Can-GCHUSA  | 3 | 71491.3 | XX |
| Ag-TendSud  | 3 | 93008.0 | X  |
| Ag-15591Gha | 3 | 583490. | X  |

#### LSD analysis for 0.14 per accessions

Method: 95.0 percentage LSD

| <i>accessions</i> | <i>Cases</i> | <i>Mean</i> | <i>Homogeneous groups</i> |
|-------------------|--------------|-------------|---------------------------|
| In-HoneyDewUSA    | 3            | 750.0       | X                         |
| In-AmAoroSp       | 2            | 750.0       | X                         |
| Ac-SVIIInd        | 2            | 750.0       | X                         |
| Con-NanChi        | 3            | 750.0       | X                         |
| In-LaEscrSp       | 2            | 750.0       | X                         |
| Ac-TGR1551Zimb    | 3            | 750.0       | X                         |
| Con-FreeCJa       | 3            | 750.0       | X                         |
| Can-NCFran        | 2            | 758.5       | X                         |
| In-RoMoch1Sp      | 3            | 766.333     | X                         |
| Tibish-Ksud       | 3            | 768.667     | X                         |
| In-TeSp           | 3            | 782.333     | X                         |
| Dud-QPMAfg        | 3            | 784.0       | X                         |
| Con-ShiroJa       | 3            | 797.667     | X                         |
| In-CrabPor        | 2            | 803.0       | X                         |
| In-TeNinvSp2      | 2            | 806.5       | X                         |
| Ac-SRKSLan        | 3            | 814.667     | X                         |
| In-BBescrSp       | 3            | 832.667     | X                         |
| Con-PauPol        | 3            | 837.0       | X                         |
| In-AmCañSp        | 3            | 853.667     | X                         |
| Am-KafEgy         | 2            | 854.0       | X                         |
| Can-EanaHun       | 3            | 854.667     | X                         |
| Con-GMJJa         | 3            | 881.333     | X                         |
| Flex-Co20Ind      | 3            | 883.333     | X                         |
| Chi-VellInd       | 3            | 918.0       | X                         |
| In-TeNinvSp       | 2            | 931.5       | X                         |
| In-LaBolasSp      | 3            | 941.0       | X                         |
| In-PsPiñSp        | 3            | 993.333     | X                         |
| In-ComunSp        | 2            | 1012.0      | X                         |
| In-BBredSp        | 3            | 1034.0      | X                         |
| Am-TokTaj         | 3            | 1043.33     | X                         |
| La-ErizoSp        | 3            | 1044.33     | X                         |
| Can-PearlJa       | 3            | 1083.67     | X                         |
| Can-TopUSA        | 3            | 1098.67     | X                         |
| Can-VedFran       | 3            | 1113.33     | X                         |
| Can-GCHUSA        | 3            | 1119.0      | X                         |
| Flex-AryaInd      | 3            | 1121.33     | X                         |
| Can-Ogen2Is       | 3            | 1136.0      | X                         |
| Can-SucrFran      | 3            | 1144.33     | X                         |
| Am-HassanTur      | 3            | 1149.33     | X                         |
| Dud-QAPMGeorg     | 3            | 1161.67     | X                         |
| Am-NesviGeor      | 3            | 1173.0      | X                         |
| Flex-SnakeSA      | 3            | 1177.0      | X                         |
| In-TDewUSA        | 3            | 1199.0      | X                         |
| chate-Carlta      | 1            | 1248.0      | X                         |
| La-OgenBul        | 3            | 1294.67     | X                         |
| Mom-MR1Ind        | 3            | 1298.0      | X                         |
| Am-korcaRus       | 3            | 1313.33     | X                         |
| Can-HBJUSA        | 3            | 1319.33     | X                         |
| Ag-WChInd         | 3            | 1320.0      | X                         |

|              |   |         |   |
|--------------|---|---------|---|
| Am-AnaFran   | 3 | 1344.33 | X |
| Can-WiUSA    | 3 | 1344.67 | X |
| Mom-PII24Ind | 3 | 1357.33 | X |
| La-KroFran   | 4 | 1368.25 | X |
| Am-KizilUzbe | 3 | 1381.67 | X |
| Can-NOFran   | 2 | 1400.0  | X |
| Can-DulUSA   | 3 | 1443.33 | X |
| Can-EfJa     | 3 | 1449.0  | X |
| Can-PGRFran  | 3 | 1472.0  | X |
| Mom-KhaInd   | 3 | 1497.0  | X |
| La-ZatIta    | 3 | 1544.33 | X |
| Am-YokIs     | 2 | 1650.5  | X |
| Ac-G22843Se  | 3 | 1857.33 | X |
| In-CGBUSA    | 3 | 2614.33 | X |
| La-CascaPor  | 2 | 2658.0  | X |
| Can-SemUSA   | 2 | 3973.0  | X |
| Con-BaishChi | 3 | 4097.0  | X |
| Can-GyFran   | 2 | 4886.5  | X |
| Con-SCKo     | 3 | 5442.67 | X |
| Ag-TendSud   | 3 | 7998.33 | X |
| Ag-CallInd   | 3 | 8199.0  | X |
| Con-MielChi  | 3 | 55632.7 | X |
| Ag-15591Gha  | 3 | 80259.0 | X |

#### LSD analysis for P.1 per accessions

Method: 95.0 percentage LSD

| <i>accessions</i> | <i>Cases</i> | <i>Mean</i> | <i>Homogeneous groups</i> |
|-------------------|--------------|-------------|---------------------------|
| Can-DulUSA        | 3            | 6882.67     | X                         |
| Can-GyFran        | 2            | 9591.5      | X                         |
| La-CascaPor       | 2            | 11348.0     | X                         |
| Am-YokIs          | 2            | 11627.0     | X                         |
| Am-KizilUzbe      | 3            | 12441.7     | X                         |
| Am-HassanTur      | 3            | 12773.7     | X                         |
| Mom-MR1Ind        | 3            | 13011.7     | X                         |
| Ac-G22843Se       | 3            | 13373.0     | X                         |
| Can-Ogen2Is       | 3            | 15840.3     | X                         |
| Am-AnaFran        | 3            | 16491.0     | X                         |
| In-TeNinvSp       | 2            | 16786.0     | X                         |
| La-OgenBul        | 3            | 16850.3     | X                         |
| Can-WiUSA         | 3            | 17611.3     | X                         |
| Can-NOFran        | 2            | 18219.5     | X                         |
| Can-SucrFran      | 3            | 18612.0     | X                         |
| Can-PearlJa       | 3            | 18766.0     | X                         |
| In-PsPiñSp        | 3            | 18917.0     | X                         |
| Can-VedFran       | 3            | 19040.3     | X                         |
| Mom-PII24Ind      | 3            | 19177.7     | X                         |
| Ac-SRKSLan        | 3            | 19506.0     | X                         |
| In-LaEscrSp       | 2            | 19822.5     | X                         |
| Con-MielChi       | 3            | 19855.0     | X                         |
| Mom-KhaInd        | 3            | 20638.7     | X                         |
| In-TeNinvSp2      | 2            | 21643.0     | X                         |
| Dud-QAPMGeorg     | 3            | 22140.7     | X                         |
| Ac-TGR1551Zimb    | 3            | 22609.7     | X                         |
| La-ErizoSp        | 3            | 22653.7     | X                         |
| Ag-TendSud        | 3            | 22783.3     | X                         |
| In-BBredSp        | 3            | 23015.0     | X                         |

|                |   |         |        |
|----------------|---|---------|--------|
| In-TDewUSA     | 3 | 23334.7 | X      |
| Con-FreeCJa    | 3 | 23753.0 | X      |
| In-RoMoch1Sp   | 3 | 24124.0 | X      |
| In-CGBUSA      | 3 | 24446.0 | X      |
| Con-BaishChi   | 3 | 24541.7 | X      |
| Tibish-Ksud    | 3 | 24800.0 | X      |
| Can-NCFran     | 2 | 25231.5 | X      |
| In-LaBolasSp   | 3 | 26115.3 | X      |
| In-TeSp        | 3 | 26205.3 | X      |
| Chi-VellInd    | 3 | 26652.3 | X      |
| Ac-SVIInd      | 2 | 26907.0 | X      |
| Con-GMJJa      | 3 | 27654.0 | X      |
| Can-GCHUSA     | 3 | 28493.7 | X      |
| Am-KafEgy      | 2 | 28577.5 | X      |
| Am-NesviGeor   | 3 | 28760.0 | X      |
| In-CrabPor     | 2 | 30992.5 | XX     |
| Can-EanaHun    | 3 | 31280.3 | X      |
| Flex-AryaInd   | 3 | 31909.7 | X      |
| In-HoneyDewUSA | 3 | 31935.7 | X      |
| Con-SCKo       | 3 | 35026.7 | X      |
| Can-HBJUSA     | 3 | 35762.7 | X      |
| Dud-QPMAfg     | 3 | 36751.0 | X      |
| In-BBescrSp    | 3 | 36797.0 | X      |
| Am-korcaRus    | 3 | 38696.3 | X      |
| Con-NanChi     | 3 | 38770.0 | X      |
| Ag-WChInd      | 3 | 41187.3 | X      |
| Ag-15591Gha    | 3 | 41229.7 | X      |
| chate-Carlta   | 1 | 46746.0 | XXXX   |
| La-KroFran     | 4 | 49027.3 | XX     |
| In-AmCañSp     | 3 | 51599.7 | XX     |
| Ag-CallInd     | 3 | 59164.3 | XXX    |
| Flex-Co20Ind   | 3 | 63640.7 | XXX    |
| Con-PauPol     | 3 | 67503.7 | XXX    |
| Flex-SnakeSA   | 3 | 68028.0 | XXX    |
| Can-EfJa       | 3 | 76223.7 | XXX    |
| Am-TokTaj      | 3 | 83773.0 | XXXX   |
| Can-SemUSA     | 2 | 84356.0 | XXXX   |
| La-Zatlta      | 3 | 85738.3 | XXXX   |
| In-ComunSp     | 2 | 160858. | XXXXXX |
| Can-TopUSA     | 3 | 163235. | XXX    |
| Can-PGRFran    | 3 | 186326. | XXX    |
| In-AmAoroSp    | 2 | 264854. | XX     |
| Con-ShiroJa    | 3 | 280115. | X      |

#### LSD analysis for P.2 per accessions

Method: 95.0 percentage LSD

| <i>accessions</i> | <i>Cases</i> | <i>Mean</i> | <i>Homogeneous groups</i> |
|-------------------|--------------|-------------|---------------------------|
| Can-DulUSA        | 3            | 19126.0     | X                         |
| Can-GyFran        | 2            | 28502.5     | X                         |
| Am-HassanTur      | 3            | 30180.0     | X                         |
| La-CascaPor       | 2            | 30459.5     | X                         |
| Ac-G22843Se       | 3            | 32211.3     | X                         |
| Am-KizilUzbe      | 3            | 33413.0     | X                         |
| Am-YokIs          | 2            | 34734.0     | X                         |
| Mom-MR1Ind        | 3            | 34999.3     | X                         |
| In-TeNinvSp       | 2            | 41245.5     | X                         |

|                |   |         |      |
|----------------|---|---------|------|
| La-OgenBul     | 3 | 41275.0 | X    |
| Ac-SRKSLan     | 3 | 41337.3 | X    |
| Can-SucrFran   | 3 | 41698.7 | X    |
| Am-AnaFran     | 3 | 41998.0 | X    |
| Can-Ogen2Is    | 3 | 42643.0 | X    |
| In-PsPiñSp     | 3 | 42723.0 | X    |
| Can-WiUSA      | 3 | 43429.7 | X    |
| Can-VedFran    | 3 | 44013.0 | X    |
| Mom-KhaInd     | 3 | 45636.7 | X    |
| Can-PearlJa    | 3 | 46070.3 | X    |
| In-LaEscrSp    | 2 | 47043.0 | X    |
| Can-NOFran     | 2 | 47260.0 | X    |
| Con-MielChi    | 3 | 47770.3 | X    |
| Dud-QAPMGeorg  | 3 | 49805.3 | X    |
| In-RoMoch1Sp   | 3 | 50043.3 | X    |
| Mom-PII24Ind   | 3 | 50109.0 | X    |
| In-TeNinvSp2   | 2 | 50154.0 | X    |
| In-BBredSp     | 3 | 50993.0 | X    |
| Ac-TGR1551Zimb | 3 | 51431.7 | X    |
| Tibish-Ksud    | 3 | 51554.3 | X    |
| Con-FreeCJa    | 3 | 52011.3 | X    |
| In-CGBUSA      | 3 | 53800.7 | X    |
| Ag-TendSud     | 3 | 55603.0 | X    |
| In-TeSp        | 3 | 57385.0 | X    |
| Can-NCFran     | 2 | 57622.5 | X    |
| La-ErizoSp     | 3 | 59567.7 | X    |
| Ac-SVIInd      | 2 | 60708.0 | X    |
| In-TDewUSA     | 3 | 61942.7 | X    |
| Chi-VellInd    | 3 | 62191.7 | X    |
| Am-KafEgy      | 2 | 64960.0 | X    |
| Con-GMJJa      | 3 | 65172.7 | X    |
| In-LaBolasSp   | 3 | 66226.7 | X    |
| In-CrabPor     | 2 | 68856.0 | X    |
| Am-NesviGeor   | 3 | 68859.0 | X    |
| Can-GCHUSA     | 3 | 71090.3 | X    |
| In-HoneyDewUSA | 3 | 71952.0 | X    |
| Flex-AryaInd   | 3 | 72380.0 | X    |
| Can-EanaHun    | 3 | 72569.7 | X    |
| Dud-QPMAfg     | 3 | 82959.7 | X    |
| Am-korcaRus    | 3 | 83128.3 | X    |
| Con-SCKo       | 3 | 84039.0 | X    |
| Con-NanChi     | 3 | 84962.7 | X    |
| In-BBescrSp    | 3 | 86180.7 | X    |
| Con-BaishChi   | 3 | 92328.0 | X    |
| Ag-WChInd      | 3 | 93081.0 | X    |
| Can-HBJUSA     | 3 | 93823.7 | X    |
| chate-Carlta   | 1 | 105349. | XXXX |
| Ag-15591Gha    | 3 | 107164. | X X  |
| La-KroFran     | 4 | 113142. | X X  |
| Ag-CallInd     | 3 | 129778. | XXX  |
| In-AmCañSp     | 3 | 142115. | XXX  |
| Flex-Co20Ind   | 3 | 146274. | XXX  |
| Flex-SnakeSA   | 3 | 163996. | XXX  |
| Can-SemUSA     | 2 | 175008. | XXXX |
| Can-EfJa       | 3 | 178870. | XXXX |
| Am-TokTaj      | 3 | 185114. | XXXX |
| La-Zatlta      | 3 | 196360. | XXXX |

|             |   |         |        |
|-------------|---|---------|--------|
| Con-PauPol  | 3 | 198628. | XXXX   |
| Can-TopUSA  | 3 | 347148. | X XX   |
| In-ComunSp  | 2 | 355950. | XXXXXX |
| Can-PGRFran | 3 | 403840. | XXX    |
| In-AmAoroSp | 2 | 542355. | XX     |
| Con-ShiroJa | 3 | 581930. | X      |

### LSD analysis for P.3 per accessions

Method: 95.0 percentage LSD

| <i>accessions</i> | <i>Cases</i> | <i>Mean</i> | <i>Homogeneous groups</i> |
|-------------------|--------------|-------------|---------------------------|
| Can-SucrFran      | 3            | 750.0       | X                         |
| Am-YokIs          | 2            | 750.0       | XX                        |
| Can-GyFran        | 2            | 750.0       | XX                        |
| Can-DulUSA        | 3            | 750.0       | X                         |
| La-CascaPor       | 2            | 750.0       | XX                        |
| Ac-G22843Se       | 3            | 750.0       | X                         |
| Mom-KhaInd        | 3            | 2648.0      | X                         |
| Mom-PII24Ind      | 3            | 4114.67     | X                         |
| Am-AnaFran        | 3            | 4316.33     | X                         |
| Dud-QAPMGeorg     | 3            | 4636.33     | X                         |
| In-TeSp           | 3            | 4832.67     | X                         |
| La-ErizoSp        | 3            | 5111.0      | XX                        |
| In-TeNinvSp       | 2            | 5202.0      | XX                        |
| Am-HassanTur      | 3            | 5408.0      | XX                        |
| Can-HBJUSA        | 3            | 5423.67     | XX                        |
| Mom-MR1Ind        | 3            | 5452.67     | XX                        |
| Am-KizilUzbe      | 3            | 5513.67     | XX                        |
| Can-PearlJa       | 3            | 5717.0      | XX                        |
| Can-WiUSA         | 3            | 6609.33     | XX                        |
| Ac-SRKSLan        | 3            | 6632.33     | XX                        |
| In-BBredSp        | 3            | 6751.67     | XX                        |
| Con-NanChi        | 3            | 6770.0      | XX                        |
| La-OgenBul        | 3            | 6798.0      | XX                        |
| In-TDewUSA        | 3            | 7011.67     | XX                        |
| Can-NOFran        | 2            | 7389.5      | XX                        |
| In-LaBolasSp      | 3            | 7408.33     | XX                        |
| In-CGBUSA         | 3            | 7675.0      | XX                        |
| Con-MielChi       | 3            | 7858.0      | XX                        |
| Can-Ogen2Is       | 3            | 8031.0      | XX                        |
| Con-FreeCJa       | 3            | 8476.33     | XX                        |
| Can-VedFran       | 3            | 9099.0      | XX                        |
| Ac-TGR1551Zimb    | 3            | 10143.7     | XX                        |
| In-PsPiñSp        | 3            | 10154.0     | XX                        |
| In-LaEscrSp       | 2            | 10214.5     | XX                        |
| In-TeNinvSp2      | 2            | 10642.0     | XX                        |
| Can-EanaHun       | 3            | 10657.3     | XX                        |
| Ag-TendSud        | 3            | 11927.7     | XX                        |
| La-KroFran        | 4            | 12023.0     | XX                        |
| Can-NCFran        | 2            | 12148.5     | XX                        |
| Am-NesviGeor      | 3            | 12483.3     | XX                        |
| In-RoMoch1Sp      | 3            | 12582.0     | XX                        |
| Am-KafEgy         | 2            | 12694.5     | XX                        |
| Tibish-Ksud       | 3            | 12992.7     | XX                        |
| Flex-AryaInd      | 3            | 13074.3     | XX                        |
| In-HoneyDewUSA    | 3            | 13403.7     | XX                        |
| Chi-VellInd       | 3            | 13466.7     | XX                        |

|              |   |         |      |
|--------------|---|---------|------|
| Con-GMJJa    | 3 | 13668.3 | XX   |
| Ac-SVInd     | 2 | 14138.0 | XX   |
| Can-GCHUSA   | 3 | 14701.7 | XX   |
| Con-SCKo     | 3 | 15130.3 | XX   |
| In-CrabPor   | 2 | 16297.5 | XX   |
| Dud-QPMAfg   | 3 | 16349.3 | XX   |
| Con-BaishChi | 3 | 17246.7 | XX   |
| Am-korcaRus  | 3 | 17528.0 | XX   |
| Ag-WChInd    | 3 | 17906.0 | XX   |
| In-BBescrSp  | 3 | 18483.7 | XX   |
| chate-CarIta | 1 | 21598.0 | XXXX |
| Ag-CallInd   | 3 | 22425.0 | XXX  |
| Flex-SnakeSA | 3 | 24361.0 | XXX  |
| Flex-Co20Ind | 3 | 25236.7 | XXX  |
| Ag-15591Gha  | 3 | 26813.0 | XXXX |
| Can-SemUSA   | 2 | 29377.0 | XXXX |
| Am-TokTaj    | 3 | 30891.7 | XXXX |
| Can-EfJa     | 3 | 32592.7 | XXXX |
| In-AmCañSp   | 3 | 33591.7 | XXXX |
| La-ZatIta    | 3 | 38575.0 | XXXX |
| Con-PauPol   | 3 | 43034.3 | XXXX |
| In-ComunSp   | 2 | 58701.0 | XXXX |
| Can-TopUSA   | 3 | 70327.3 | XXXX |
| Can-PGRFran  | 3 | 73365.3 | XXX  |
| In-AmAoroSp  | 2 | 104213. | XX   |
| Con-ShiroJa  | 3 | 114830. | X    |

#### LSD analysis for P.4 per accessions

Method: 95.0 percentage LSD

| <i>accessions</i> | <i>Cases</i> | <i>Mean</i> | <i>Homogeneous groups</i> |
|-------------------|--------------|-------------|---------------------------|
| Can-DulUSA        | 3            | 6919.67     | X                         |
| Ac-G22843Se       | 3            | 10394.0     | XX                        |
| Can-GyFran        | 2            | 10720.0     | XXXX                      |
| La-CascaPor       | 2            | 11151.0     | XXXX                      |
| Am-HassanTur      | 3            | 11793.0     | XX                        |
| Am-KizilUzbe      | 3            | 12369.0     | XX                        |
| Am-YokIs          | 2            | 12851.5     | XXXXXX                    |
| Mom-MR1Ind        | 3            | 12944.7     | XXX                       |
| Can-WiUSA         | 3            | 13584.3     | XXX                       |
| Ac-SRKSLan        | 3            | 13639.7     | XXX                       |
| Can-PearlJa       | 3            | 13795.0     | XXX                       |
| In-TeNinvSp       | 2            | 14253.0     | XXXXXX                    |
| La-OgenBul        | 3            | 14867.3     | XXX                       |
| Am-AnaFran        | 3            | 14870.7     | XXX                       |
| Can-VedFran       | 3            | 14889.0     | XXX                       |
| Can-SucrFran      | 3            | 14897.7     | XXX                       |
| In-BBredSp        | 3            | 15063.3     | XXX                       |
| Mom-KhaInd        | 3            | 15755.0     | XXX                       |
| In-LaEscrSp       | 2            | 15970.5     | XXXXXX                    |
| In-PsPiñSp        | 3            | 16018.0     | XXXX                      |
| Can-Ogen2Is       | 3            | 16052.0     | XXXX                      |
| In-TeNinvSp2      | 2            | 16113.0     | XXXXXX                    |
| Con-FreeCJa       | 3            | 16175.7     | XXXX                      |
| Ag-TendSud        | 3            | 16843.0     | XXXX                      |
| Ac-TGR1551Zimb    | 3            | 16869.0     | XXXX                      |
| Mom-PII24Ind      | 3            | 17125.7     | XXXX                      |



|                |   |         |            |
|----------------|---|---------|------------|
| Con-GMJa       | 3 | 17207.7 | XXXXXX     |
| In-RoMoch1Sp   | 3 | 17445.3 | XXXXXX     |
| Tibish-Ksud    | 3 | 17563.3 | XXXXXX     |
| Can-NOFran     | 2 | 17597.0 | XXXXXX     |
| Dud-QAPMGeorg  | 3 | 17607.0 | XXXXXX     |
| Con-MielChi    | 3 | 17878.0 | XXXXXX     |
| Chi-VellInd    | 3 | 18673.0 | XXXXXX     |
| Can-NCFran     | 2 | 18837.0 | XXXXXX     |
| In-TeSp        | 3 | 18881.7 | XXXXXX     |
| In-CGBUSA      | 3 | 18967.3 | XXXXXX     |
| In-CrabPor     | 2 | 20012.5 | XXXXXXXX   |
| Ac-SVInd       | 2 | 20093.5 | XXXXXXXX   |
| Am-KafEgy      | 2 | 20368.5 | XXXXXXXX   |
| Flex-AryaInd   | 3 | 20645.3 | XXXXXX     |
| In-TDewUSA     | 3 | 21231.7 | XXXXXX     |
| In-HoneyDewUSA | 3 | 22277.0 | XXXXXX     |
| Ag-WChInd      | 3 | 22750.0 | XXXXXX     |
| Can-EanaHun    | 3 | 23030.7 | XXXXXX     |
| In-LaBolasSp   | 3 | 23074.0 | XXXXXX     |
| Am-korcaRus    | 3 | 23183.3 | XXXXXX     |
| La-ErizoSp     | 3 | 23214.3 | XXXXXX     |
| Can-GCHUSA     | 3 | 24265.3 | XXXXXX     |
| Con-BaishChi   | 3 | 24275.3 | XXXXXXXX   |
| Con-NanChi     | 3 | 24994.3 | XXXXXXXX   |
| Dud-QPMAfg     | 3 | 25480.0 | XXXXXXXX   |
| In-BBescrSp    | 3 | 26145.7 | XXXXXXXX   |
| Am-NesviGeor   | 3 | 26535.3 | XXXXXXXX   |
| Can-HBJUSA     | 3 | 27248.3 | XXXXXXXX   |
| Con-SCKo       | 3 | 31821.0 | XXXXXXXX   |
| chate-Carlta   | 1 | 32567.0 | XXXXXXXXXX |
| La-KroFran     | 4 | 32620.8 | XXXXXXXXXX |
| Can-SemUSA     | 2 | 35057.0 | XXXXXXXXXX |
| Ag-CallInd     | 3 | 37037.0 | XXXXXXXXXX |
| In-AmCañSp     | 3 | 38502.0 | XXXXXXXXXX |
| Flex-Co20Ind   | 3 | 38906.3 | XXXXXXXXXX |
| Ag-15591Gha    | 3 | 40845.3 | XXXXXXXXXX |
| Am-TokTaj      | 3 | 41741.3 | XXXXXXXXXX |
| Can-EfJa       | 3 | 43500.0 | XXXXXXXXXX |
| Flex-SnakeSA   | 3 | 52189.0 | XXXXXXXXXX |
| La-ZatIta      | 3 | 56171.7 | XXXXXX     |
| Con-PauPol     | 3 | 59561.0 | XXXXXX     |
| In-ComunSp     | 2 | 66033.5 | XXXXXX     |
| Can-TopUSA     | 3 | 67957.3 | XXXX       |
| Can-PGRFran    | 3 | 71096.7 | XXX        |
| In-AmAoroSp    | 2 | 94598.5 | XX         |
| Con-ShiroJa    | 3 | 101862. | X          |

#### LSD analysis for P.5 per accessions

Method: 95.0 percentage LSD

| <i>accessions</i> | <i>Cases</i> | <i>Mean</i> | <i>Homogeneous groups</i> |
|-------------------|--------------|-------------|---------------------------|
| La-CascaPor       | 2            | 266754.     | X                         |
| Can-GCHUSA        | 3            | 313068.     | X                         |
| Con-MielChi       | 3            | 322160.     | X                         |
| Con-BaishChi      | 3            | 323346.     | X                         |
| Am-AnaFran        | 3            | 346626.     | X                         |
| Con-SCKo          | 3            | 353809.     | X                         |

|                |   |         |          |
|----------------|---|---------|----------|
| Can-DulUSA     | 3 | 364549. | XX       |
| Dud-QPMAfg     | 3 | 372031. | XX       |
| Ac-SRKSLan     | 3 | 376324. | XX       |
| Con-GMJJa      | 3 | 376958. | XX       |
| Ac-SVIIInd     | 2 | 378610. | XXXX     |
| In-RoMochISp   | 3 | 392874. | XXX      |
| Con-ShiroJa    | 3 | 399996. | XXX      |
| La-KroFran     | 4 | 408935. | XX       |
| Con-NanChi     | 3 | 410769. | XXXX     |
| In-PsPiñSp     | 3 | 426816. | XXXX     |
| Can-TopUSA     | 3 | 426922. | XXXX     |
| Mom-PII24Ind   | 3 | 430577. | XXXX     |
| Dud-QAPMGeorg  | 3 | 430760. | XXXX     |
| Tibish-Ksud    | 3 | 440856. | XXXX     |
| Am-NesviGeor   | 3 | 440879. | XXXX     |
| Am-KafEgy      | 2 | 442938. | XXXXXX   |
| Con-PauPol     | 3 | 444109. | XXXX     |
| chate-CarIta   | 1 | 445947. | XXXXXXXX |
| Am-korcaRus    | 3 | 456867. | XXXX     |
| In-TeNinvSp2   | 2 | 460945. | XXXXXXXX |
| Ag-TendSud     | 3 | 462988. | XXXX     |
| Ac-TGR1551Zimb | 3 | 463216. | XXXX     |
| Can-SucrFran   | 3 | 469963. | XXXX     |
| Con-FreeCJa    | 3 | 472400. | XXXX     |
| In-CrabPor     | 2 | 491201. | XXXXXXXX |
| La-OgenBul     | 3 | 494635. | XXXXXX   |
| Ag-CallInd     | 3 | 501824. | XXXXXX   |
| Ag-WChInd      | 3 | 502949. | XXXXXX   |
| Flex-SnakeSA   | 3 | 510765. | XXXXXXXX |
| In-LaBolasSp   | 3 | 511791. | XXXXXXXX |
| In-BBescrSp    | 3 | 529135. | XXXXXXXX |
| In-AmAoroSp    | 2 | 529997. | XXXXXXXX |
| Flex-Co20Ind   | 3 | 531667. | XXXXXXXX |
| Can-EanaHun    | 3 | 536144. | XXXXXXXX |
| Am-HassanTur   | 3 | 541403. | XXXXXXXX |
| Can-Ogen2Is    | 3 | 543150. | XXXXXXXX |
| La-ErizoSp     | 3 | 543682. | XXXXXXXX |
| In-TDewUSA     | 3 | 554010. | XXXXXXXX |
| Can-NCFran     | 2 | 558300. | XXXXXXXX |
| In-LaEscrSp    | 2 | 574776. | XXXXXXXX |
| Can-EfJa       | 3 | 577675. | XXXXXXXX |
| Can-PGRFran    | 3 | 584011. | XXXXXXXX |
| In-AmCañSp     | 3 | 584636. | XXXXXXXX |
| Chi-VellInd    | 3 | 599340. | XXXXXXXX |
| In-HoneyDewUSA | 3 | 627282. | XXXXXXXX |
| Am-KizilUzbe   | 3 | 633495. | XXXXXXXX |
| Can-HBJUSA     | 3 | 642139. | XXXXXXXX |
| Can-GyFran     | 2 | 655503. | XXXXXXXX |
| Mom-MR1Ind     | 3 | 656906. | XXXXXXXX |
| Flex-AryaInd   | 3 | 658027. | XXXXXXXX |
| Can-PearlJa    | 3 | 681610. | XXXXXXXX |
| In-BBredSp     | 3 | 690460. | XXXXXXXX |
| Can-VedFran    | 3 | 701564. | XXXXXXXX |
| In-TeNinvSp    | 2 | 710948. | XXXXXXXX |
| La-ZatIta      | 3 | 713557. | XXXXXXXX |
| In-ComunSp     | 2 | 738323. | XXXXXXXX |
| In-TeSp        | 3 | 764549. | XXXXXXXX |

|             |   |           |        |
|-------------|---|-----------|--------|
| Can-WiUSA   | 3 | 787740.   | XXXXXX |
| Ag-15591Gha | 3 | 810393.   | XXXXXX |
| Am-YokIs    | 2 | 855397.   | XXXXXX |
| Mom-KhaInd  | 3 | 887834.   | XXXX   |
| Ac-G22843Se | 3 | 907182.   | XXXX   |
| In-CGBUSA   | 3 | 1.07127E6 | XXX    |
| Can-NOFran  | 2 | 1.19053E6 | XX     |
| Am-TokTaj   | 3 | 1.29614E6 | X      |
| Can-SemUSA  | 2 | 1.82868E6 | X      |

#### LSD analysis for P.6 per accessions

Method: 95.0 percentage LSD

| <i>accessions</i> | <i>Cases</i> | <i>Mean</i> | <i>Homogeneous groups</i> |
|-------------------|--------------|-------------|---------------------------|
| Con-ShiroJa       | 3            | 750.0       | X                         |
| chate-Carlta      | 1            | 750.0       | XXX                       |
| In-BBredSp        | 3            | 755.333     | X                         |
| Con-SCKo          | 3            | 760.333     | X                         |
| Flex-AryalInd     | 3            | 764.0       | X                         |
| Mom-PII24Ind      | 3            | 767.333     | X                         |
| Ac-SRKSLan        | 3            | 769.0       | X                         |
| In-HoneyDewUSA    | 3            | 779.0       | X                         |
| Flex-Co20Ind      | 3            | 787.0       | X                         |
| In-AmAoroSp       | 2            | 809.0       | X                         |
| In-CrabPor        | 2            | 810.0       | X                         |
| Ag-WChInd         | 3            | 975.0       | X                         |
| In-TDewUSA        | 3            | 1271.33     | X                         |
| Con-MielChi       | 3            | 1926.67     | X                         |
| Con-BaishChi      | 3            | 1962.67     | X                         |
| Con-PauPol        | 3            | 3661.0      | X                         |
| Ac-SVIIInd        | 2            | 3945.0      | X                         |
| In-LaBolasSp      | 3            | 4076.33     | X                         |
| Flex-SnakeSA      | 3            | 4772.33     | X                         |
| Am-YokIs          | 2            | 4774.0      | X                         |
| Ag-TendSud        | 3            | 5229.67     | X                         |
| Can-NCFran        | 2            | 5578.5      | X                         |
| Con-FreeCJa       | 3            | 5975.67     | X                         |
| Mom-MRIInd        | 3            | 6282.33     | X                         |
| In-RoMoch1Sp      | 3            | 6324.33     | X                         |
| Am-TokTaj         | 3            | 6959.0      | X                         |
| In-PsPiñSp        | 3            | 7319.0      | X                         |
| Ag-15591Gha       | 3            | 7727.0      | X                         |
| In-ComunSp        | 2            | 8220.0      | X                         |
| Dud-QPMAfg        | 3            | 11024.0     | X                         |
| Can-Ogen2Is       | 3            | 11487.3     | X                         |
| In-CGBUSA         | 3            | 12201.7     | X                         |
| Con-NanChi        | 3            | 12717.3     | X                         |
| In-BBescrSp       | 3            | 12721.0     | X                         |
| Am-KizilUzbe      | 3            | 13107.3     | X                         |
| Am-KafEgy         | 2            | 14156.0     | X                         |
| Ac-TGR1551Zimb    | 3            | 15036.3     | X                         |
| Ag-CallInd        | 3            | 15912.0     | X                         |
| Am-NesviGeor      | 3            | 19166.7     | X                         |
| Am-HassanTur      | 3            | 21087.3     | X                         |
| Con-GMJJa         | 3            | 25283.7     | X                         |
| Chi-VellInd       | 3            | 27737.3     | X                         |
| In-TeNinvSp2      | 2            | 30106.0     | X                         |

|               |   |           |     |
|---------------|---|-----------|-----|
| Ac-G22843Se   | 3 | 31098.3   | X   |
| In-AmCañSp    | 3 | 33747.3   | X   |
| In-LaEscrSp   | 2 | 35157.5   | X   |
| Tibish-Ksud   | 3 | 41712.3   | X   |
| Can-WiUSA     | 3 | 42263.7   | X   |
| In-TeNinvSp   | 2 | 44332.5   | XX  |
| La-ErizoSp    | 3 | 45997.0   | X   |
| Mom-KhaInd    | 3 | 47002.0   | X   |
| Dud-QAPMGeorg | 3 | 52549.7   | X   |
| Can-EfJa      | 3 | 53205.7   | X   |
| Am-korcaRus   | 3 | 54218.0   | X   |
| Can-DulUSA    | 3 | 55892.3   | X   |
| In-TeSp       | 3 | 58676.0   | X   |
| Can-TopUSA    | 3 | 70932.0   | XX  |
| La-OgenBul    | 3 | 71488.0   | XX  |
| Can-PearlJa   | 3 | 81537.7   | XXX |
| Can-EanaHun   | 3 | 101226.   | XXX |
| Can-HBJUSA    | 3 | 124919.   | XXX |
| Can-NOFran    | 2 | 130599.   | XXX |
| Can-SucrFran  | 3 | 134284.   | XXX |
| Can-VedFran   | 3 | 300015.   | XXX |
| La-ZatIta     | 3 | 317257.   | XX  |
| Can-SemUSA    | 2 | 339930.   | XX  |
| La-KroFran    | 4 | 504716.   | X   |
| Can-GCHUSA    | 3 | 793614.   | X   |
| Can-PGRFran   | 3 | 797341.   | X   |
| Am-AnaFran    | 3 | 1.37033E6 | X   |
| Can-GyFran    | 2 | 1.70653E6 | X   |
| La-CascaPor   | 2 | 2.49374E6 | X   |

#### LSD analysis for P.7 per accessions

Method: 95.0 percentage LSD

| <i>accessions</i> | <i>Cases</i> | <i>Mean</i> | <i>Homogeneous groups</i> |
|-------------------|--------------|-------------|---------------------------|
| La-CascaPor       | 2            | 120117.     | X                         |
| Can-DulUSA        | 3            | 137725.     | XX                        |
| Can-SucrFran      | 3            | 139457.     | XX                        |
| In-ComunSp        | 2            | 149776.     | XXXXXX                    |
| Am-AnaFran        | 3            | 150035.     | XXX                       |
| Am-TokTaj         | 3            | 151517.     | XXXX                      |
| Can-TopUSA        | 3            | 152678.     | XXXXX                     |
| Can-EfJa          | 3            | 155078.     | XXXXXXXX                  |
| Can-HBJUSA        | 3            | 157861.     | XXXXXXXXX                 |
| La-ErizoSp        | 3            | 161163.     | XXXXXXXXXX                |
| Can-GCHUSA        | 3            | 163992.     | XXXXXXXXXXX               |
| Am-korcaRus       | 3            | 170585.     | XXXXXXXXXXXX              |
| Can-VedFran       | 3            | 171574.     | XXXXXXXXXXXX              |
| In-TDewUSA        | 3            | 176984.     | XXXXXXXXXXXX              |
| In-TeNinvSp2      | 2            | 179177.     | XXXXXXXXXXXXXX            |
| Can-WiUSA         | 3            | 180875.     | XXXXXXXXXXXXXX            |
| In-CrabPor        | 2            | 181785.     | XXXXXXXXXXXXXXXX          |
| Mom-MR1Ind        | 3            | 182221.     | XXXXXXXXXXXXXXXX          |
| Ac-SRKSLan        | 3            | 185747.     | XXXXXXXXXXXXXXXX          |
| Tibish-Ksud       | 3            | 186831.     | XXXXXXXXXXXXXXXX          |
| Can-SemUSA        | 2            | 189880.     | XXXXXXXXXXXXXXXX          |
| La-KroFran        | 4            | 190309.     | XXXXXXXXXXXXXXXX          |
| In-BBescrSp       | 3            | 192348.     | XXXXXXXXXXXXXXXX          |

|                |   |         |                    |
|----------------|---|---------|--------------------|
| In-TeSp        | 3 | 192744. | XXXXXXXXXXXXXXXXXX |
| Chi-VellInd    | 3 | 195656. | XXXXXXXXXXXXXXXXXX |
| Mom-PII24Ind   | 3 | 195713. | XXXXXXXXXXXXXXXXXX |
| Con-MielChi    | 3 | 196400. | XXXXXXXXXXXXXXXXXX |
| Dud-QPMAfg     | 3 | 196507. | XXXXXXXXXXXXXXXXXX |
| In-HoneyDewUSA | 3 | 197691. | XXXXXXXXXXXXXXXXXX |
| Ac-G22843Se    | 3 | 198320. | XXXXXXXXXXXXXXXXXX |
| In-LaEscrSp    | 2 | 199359. | XXXXXXXXXXXXXXXXXX |
| In-BBredSp     | 3 | 201128. | XXXXXXXXXXXXXXXXXX |
| In-RoMoch1Sp   | 3 | 201947. | XXXXXXXXXXXXXXXXXX |
| Con-BaishChi   | 3 | 203251. | XXXXXXXXXXXXXXXXXX |
| Am-NesviGeor   | 3 | 203415. | XXXXXXXXXXXXXXXXXX |
| Can-PearlJa    | 3 | 203541. | XXXXXXXXXXXXXXXXXX |
| Am-HassanTur   | 3 | 203603. | XXXXXXXXXXXXXXXXXX |
| In-AmAoroSp    | 2 | 204075. | XXXXXXXXXXXXXXXXXX |
| Can-Ogen2Is    | 3 | 204356. | XXXXXXXXXXXXXXXXXX |
| Am-KafEgy      | 2 | 204775. | XXXXXXXXXXXXXXXXXX |
| Can-PGRFran    | 3 | 206009. | XXXXXXXXXXXXXXXXXX |
| La-ZatIta      | 3 | 206289. | XXXXXXXXXXXXXXXXXX |
| La-OgenBul     | 3 | 207386. | XXXXXXXXXXXXXXXXXX |
| In-AmCañSp     | 3 | 207862. | XXXXXXXXXXXXXXXXXX |
| Ac-SVIIInd     | 2 | 208965. | XXXXXXXXXXXXXXXXXX |
| In-LaBolasSp   | 3 | 209027. | XXXXXXXXXXXXXXXXXX |
| Con-PauPol     | 3 | 209331. | XXXXXXXXXXXXXXXXXX |
| Can-NOFran     | 2 | 209388. | XXXXXXXXXXXXXXXXXX |
| Am-KizilUzbe   | 3 | 215077. | XXXXXXXXXXXXXXXXXX |
| Am-YokIs       | 2 | 216328. | XXXXXXXXXXXXXXXXXX |
| Mom-KhaInd     | 3 | 218026. | XXXXXXXXXXXXXXXXXX |
| Con-ShiroJa    | 3 | 218336. | XXXXXXXXXXXXXXXXXX |
| Can-NCFran     | 2 | 218426. | XXXXXXXXXXXXXXXXXX |
| Ac-TGR1551Zimb | 3 | 222376. | XXXXXXXXXXXXXXXXXX |
| Ag-15591Gha    | 3 | 225289. | XXXXXXXXXXXXXXXXXX |
| Con-SCKo       | 3 | 226254. | XXXXXXXXXXXXXXXXXX |
| Con-NanChi     | 3 | 227749. | XXXXXXXXXXXXXXXXXX |
| In-PsPiñSp     | 3 | 228851. | XXXXXXXXXXXXXXXXXX |
| Con-GMJJa      | 3 | 229115. | XXXXXXXXXXXXXXXXXX |
| In-CGBUSA      | 3 | 230421. | XXXXXXXXXXXXXX     |
| In-TeNinvSp    | 2 | 231292. | XXXXXXXXXXXXXXXXXX |
| Can-EanaHun    | 3 | 232786. | XXXXXXXXXXXXXX     |
| Con-FreeCJa    | 3 | 232915. | XXXXXXXXXXXXXX     |
| Can-GyFran     | 2 | 240241. | XXXXXXXXXXXXXX     |
| Dud-QAPMGeorg  | 3 | 240312. | XXXXXXXXXXXXXX     |
| Ag-TendSud     | 3 | 243065. | XXXXXXXXXXXXXX     |
| Flex-AryaInd   | 3 | 249769. | XXXXXXXXXXXXXX     |
| Ag-CallInd     | 3 | 251449. | XXXXXXXXXXXXXX     |
| Flex-SnakeSA   | 3 | 253578. | XXXXXXXXXXXXXX     |
| Flex-Co20Ind   | 3 | 254443. | XXXXXXXXXXXXXX     |
| Ag-WChInd      | 3 | 259509. | XXXXXXXXXXXXXX     |
| chate-CarIta   | 1 | 285686. | XXXXXXXXXXXXXX     |

#### LSD analysis for P.8 per accessions

Method: 95.0 percentage LSD

| <i>accessions</i> | <i>Cases</i> | <i>Mean</i> | <i>Homogeneous groups</i> |
|-------------------|--------------|-------------|---------------------------|
| Can-Ogen2Is       | 3            | 750.0       | X                         |
| In-CrabPor        | 2            | 750.0       | X                         |
| Ac-SVIIInd        | 2            | 750.0       | X                         |

|                |   |         |    |
|----------------|---|---------|----|
| Con-MielChi    | 3 | 750.0   | X  |
| In-TeNinvSp2   | 2 | 750.0   | X  |
| Con-FreeCJa    | 3 | 750.0   | X  |
| Ac-TGR1551Zimb | 3 | 750.0   | X  |
| Con-SCKo       | 3 | 750.0   | X  |
| In-TeNinvSp    | 2 | 750.0   | X  |
| Flex-SnakeSA   | 3 | 750.0   | X  |
| Dud-QPMAfg     | 3 | 750.0   | X  |
| In-HoneyDewUSA | 3 | 750.0   | X  |
| Con-NanChi     | 3 | 750.0   | X  |
| In-BBredSp     | 3 | 750.0   | X  |
| Am-KizilUzbe   | 3 | 750.0   | X  |
| Tibish-Ksud    | 3 | 750.0   | X  |
| Am-KafEgy      | 2 | 750.0   | X  |
| In-BBescrSp    | 3 | 750.0   | X  |
| Ac-SRKSLan     | 3 | 750.0   | X  |
| Mom-MR1Ind     | 3 | 750.0   | X  |
| In-RoMoch1Sp   | 3 | 750.0   | X  |
| In-AmAoroSp    | 2 | 750.0   | X  |
| In-TDewUSA     | 3 | 750.0   | X  |
| In-ComunSp     | 2 | 750.0   | X  |
| Con-BaishChi   | 3 | 750.0   | X  |
| Mom-PII24Ind   | 3 | 750.0   | X  |
| Flex-Co20Ind   | 3 | 750.0   | X  |
| Con-ShiroJa    | 3 | 750.0   | X  |
| Can-PearlJa    | 3 | 750.0   | X  |
| In-PsPiñSp     | 3 | 750.0   | X  |
| In-CGBUSA      | 3 | 1538.67 | X  |
| Am-TokTaj      | 3 | 1661.0  | X  |
| Ag-WChInd      | 3 | 1756.33 | X  |
| Con-GMJJa      | 3 | 1898.0  | X  |
| Can-NCFran     | 2 | 2178.0  | X  |
| La-ErizoSp     | 3 | 2278.0  | X  |
| In-LaEscrSp    | 2 | 2308.5  | X  |
| Ag-TendSud     | 3 | 2351.0  | X  |
| Con-PauPol     | 3 | 2473.0  | X  |
| In-AmCañSp     | 3 | 2615.0  | X  |
| Can-DulUSA     | 3 | 3046.67 | X  |
| Am-YokIs       | 2 | 3159.0  | X  |
| Flex-AryaInd   | 3 | 3550.33 | X  |
| Ac-G22843Se    | 3 | 3614.33 | X  |
| Can-HBJUSA     | 3 | 4369.33 | X  |
| chate-CarIta   | 1 | 4389.0  | XX |
| Chi-VellInd    | 3 | 5196.0  | X  |
| Can-WiUSA      | 3 | 5224.33 | X  |
| In-LaBolasSp   | 3 | 5567.33 | X  |
| Can-EanaHun    | 3 | 5807.67 | X  |
| Ag-CallInd     | 3 | 5830.0  | X  |
| La-OgenBul     | 3 | 6679.0  | X  |
| Can-TopUSA     | 3 | 7433.0  | X  |
| In-TeSp        | 3 | 7522.0  | X  |
| Am-HassanTur   | 3 | 9348.33 | X  |
| Am-NesviGeor   | 3 | 12278.3 | X  |
| Dud-QAPMGeorg  | 3 | 20807.3 | X  |
| Can-SemUSA     | 2 | 23927.0 | XX |
| Mom-KhaInd     | 3 | 30475.0 | XX |
| Can-EfJa       | 3 | 31926.0 | XX |

|              |   |         |     |
|--------------|---|---------|-----|
| Am-korcaRus  | 3 | 35195.0 | XX  |
| Can-VedFran  | 3 | 38449.0 | XX  |
| La-ZatIta    | 3 | 49428.7 | XX  |
| Can-PGRFran  | 3 | 75370.3 | XXX |
| Ag-15591Gha  | 3 | 87677.0 | XXX |
| Can-NOFran   | 2 | 134047. | XX  |
| Can-SucrFran | 3 | 163499. | XX  |
| La-KroFran   | 4 | 247246. | XX  |
| Can-GCHUSA   | 3 | 305264. | X   |
| Am-AnaFran   | 3 | 564370. | X   |
| Can-GyFran   | 2 | 846005. | X   |
| La-CascaPor  | 2 | 1.24E6  | X   |

#### LSD analysis for P.9 per accessions

Method: 95.0 percentage LSD

| <i>accessions</i> | <i>Cases</i> | <i>Mean</i> | <i>Homogeneous groups</i> |
|-------------------|--------------|-------------|---------------------------|
| In-CGBUSA         | 3            | 750.0       | X                         |
| Con-ShiroJa       | 3            | 750.0       | X                         |
| Tibish-Ksud       | 3            | 750.0       | X                         |
| Ac-TGR1551Zimb    | 3            | 750.0       | X                         |
| In-RoMoch1Sp      | 3            | 750.0       | X                         |
| In-PsPiñSp        | 3            | 1294.0      | X                         |
| Ac-SRKSLan        | 3            | 2008.67     | X                         |
| Ac-SVInd          | 2            | 2063.5      | XXXX                      |
| Con-FreeCJa       | 3            | 2241.67     | X                         |
| Flex-AryaInd      | 3            | 2813.0      | X                         |
| Flex-Co20Ind      | 3            | 4085.0      | X                         |
| In-CrabPor        | 2            | 4196.0      | XXXX                      |
| Ag-WChInd         | 3            | 4524.33     | X                         |
| In-AmAoroSp       | 2            | 8403.5      | XXXXX                     |
| In-HoneyDewUSA    | 3            | 21024.3     | X                         |
| In-BBredSp        | 3            | 24996.0     | X                         |
| chate-CarIta      | 1            | 28348.0     | XXXXXXXXXX                |
| Con-NanChi        | 3            | 39429.7     | XX                        |
| Con-BaishChi      | 3            | 57113.7     | XX                        |
| Con-GMJJa         | 3            | 74739.0     | XX                        |
| In-AmCañSp        | 3            | 82246.3     | XX                        |
| Chi-VellInd       | 3            | 83768.0     | XX                        |
| Can-NCFran        | 2            | 117371.     | XXXXXX                    |
| Dud-QPMAfg        | 3            | 124718.     | XX                        |
| In-TeNinvSp       | 2            | 167718.     | XXXXXXX                   |
| Ag-TendSud        | 3            | 173940.     | XXX                       |
| In-TDewUSA        | 3            | 206318.     | XXXX                      |
| Con-SCKo          | 3            | 271047.     | XXXXX                     |
| Can-PearlJa       | 3            | 277256.     | XXXXX                     |
| Con-MielChi       | 3            | 280387.     | XXXXX                     |
| In-TeSp           | 3            | 380716.     | XXXXXXX                   |
| Ag-CallInd        | 3            | 408594.     | XXXXXXXXX                 |
| Con-PauPol        | 3            | 453872.     | XXXXXXXXX                 |
| Ag-15591Gha       | 3            | 570152.     | XXXXXXXXX                 |
| Am-TokTaj         | 3            | 614472.     | XXXXXXXXX                 |
| Can-EanaHun       | 3            | 628676.     | XXXXXXXXX                 |
| Flex-SnakeSA      | 3            | 669378.     | XXXXXXXXX                 |
| Can-GCHUSA        | 3            | 787362.     | XXXXXXXXXX                |
| In-TeNinvSp2      | 2            | 818112.     | XXXXXXXXXX                |
| Dud-QAPMGeorg     | 3            | 1.10655E6   | XXXXXXXXXX                |

|              |   |           |              |
|--------------|---|-----------|--------------|
| Can-SucrFran | 3 | 1.12057E6 | XXXXXXXXXXXX |
| In-BBescrSp  | 3 | 1.26314E6 | XXXXXXXXXXXX |
| Can-Ogen2Is  | 3 | 1.26742E6 | XXXXXXXXXXXX |
| Can-EfJa     | 3 | 1.33608E6 | XXXXXXXXXXXX |
| Am-KafEgy    | 2 | 1.35814E6 | XXXXXXXXXXXX |
| Ac-G22843Se  | 3 | 1.40609E6 | XXXXXXXXXXXX |
| In-LaEscrSp  | 2 | 1.43204E6 | XXXXXXXXXXXX |
| Mom-KhaInd   | 3 | 1.44645E6 | XXXXXXXXXXXX |
| Can-PGRFran  | 3 | 1.67895E6 | XXXXXXXXXXXX |
| Am-HassanTur | 3 | 1.75646E6 | XXXXXXXXXXXX |
| Am-KizilUzbe | 3 | 1.87669E6 | XXXXXXXXXXXX |
| La-ZatIta    | 3 | 1.92342E6 | XXXXXXXXXXXX |
| La-ErizoSp   | 3 | 1.93124E6 | XXXXXXXXXXXX |
| Am-AnaFran   | 3 | 2.02261E6 | XXXXXXXXXXXX |
| Am-YokIs     | 2 | 2.26173E6 | XXXXXXXXXXXX |
| In-ComunSp   | 2 | 2.26926E6 | XXXXXXXXXXXX |
| Can-NOFran   | 2 | 2.3216E6  | XXXXXXXXXXXX |
| Can-TopUSA   | 3 | 2.32436E6 | XXXXXXXXXXXX |
| In-LaBolasSp | 3 | 2.33186E6 | XXXXXXXXXXXX |
| Can-VedFran  | 3 | 2.42565E6 | XXXXXXXXXXXX |
| La-OgenBul   | 3 | 2.66202E6 | XXXXXXXXXXXX |
| Mom-PII24Ind | 3 | 2.81825E6 | XXXXXX       |
| Am-korcaRus  | 3 | 2.92087E6 | XXXXXX       |
| Mom-MR1Ind   | 3 | 3.09321E6 | XXXXXX       |
| La-KroFran   | 4 | 3.37972E6 | XXXX         |
| Can-HBJUSA   | 3 | 3.39379E6 | XXXXXX       |
| Am-NesviGeor | 3 | 3.6891E6  | XXXX         |
| Can-DulUSA   | 3 | 4.67994E6 | XXXX         |
| Can-SemUSA   | 2 | 5.053E6   | XXX          |
| Can-GyFran   | 2 | 5.32425E6 | XX           |
| Can-WiUSA    | 3 | 5.83631E6 | X            |
| La-CascaPor  | 2 | 5.89465E6 | X            |

#### LSD analysis for P.10 per accessions

Method: 95.0 percentage LSD

| <i>accessions</i> | <i>Cases</i> | <i>Mean</i> | <i>Homogeneous groups</i> |
|-------------------|--------------|-------------|---------------------------|
| Can-SemUSA        | 2            | 7159.5      | XXX                       |
| Tibish-Ksud       | 3            | 10847.0     | X                         |
| Am-TokTaj         | 3            | 11347.0     | X                         |
| In-ComunSp        | 2            | 11637.0     | XXX                       |
| Can-HBJUSA        | 3            | 11999.3     | X X                       |
| In-CrabPor        | 2            | 12157.0     | XXX                       |
| La-ErizoSp        | 3            | 12261.0     | X X                       |
| In-HoneyDewUSA    | 3            | 12362.3     | X X                       |
| In-BBescrSp       | 3            | 12537.3     | X X                       |
| Ac-TGR1551Zimb    | 3            | 12578.0     | X X                       |
| In-AmCañSp        | 3            | 13038.0     | XXX                       |
| In-TeNinvSp2      | 2            | 13216.0     | XXX                       |
| Mom-PII24Ind      | 3            | 13254.3     | XXX                       |
| Con-MielChi       | 3            | 13338.7     | XXX                       |
| In-TDewUSA        | 3            | 13377.7     | XXX                       |
| In-RoMoch1Sp      | 3            | 13533.7     | XXX                       |
| In-BBredSp        | 3            | 13630.0     | XXX                       |
| Ac-SRKSLan        | 3            | 13646.7     | XXX                       |
| In-AmAoroSp       | 2            | 14087.5     | XXX                       |
| Chi-VellInd       | 3            | 14092.3     | XXX                       |



|               |   |         |        |
|---------------|---|---------|--------|
| Can-EfJa      | 3 | 14113.7 | XXX    |
| Con-ShiroJa   | 3 | 14161.3 | XXX    |
| Can-GCHUSA    | 3 | 14169.0 | XXX    |
| Dud-QPMAfg    | 3 | 14458.7 | XXX    |
| Con-PauPol    | 3 | 14579.7 | XXX    |
| Ag-15591Gha   | 3 | 14660.7 | XXX    |
| Am-korcaRus   | 3 | 14800.0 | XXX    |
| Con-FreeCJa   | 3 | 14822.7 | XXX    |
| Con-NanChi    | 3 | 15064.7 | XXX    |
| Ac-SVIInd     | 2 | 15067.0 | XXX    |
| In-TeNinvSp   | 2 | 15098.0 | XXX    |
| Am-HassanTur  | 3 | 15689.3 | XXX    |
| Am-KafEgy     | 2 | 16038.5 | XXX    |
| Am-NesviGeor  | 3 | 16084.0 | XXX    |
| In-LaBolasSp  | 3 | 16306.0 | XXX    |
| Can-PearlJa   | 3 | 16503.3 | XXX    |
| In-PsPiñSp    | 3 | 16878.3 | XXX    |
| Can-Ogen2Is   | 3 | 17051.7 | XXX    |
| La-OgenBul    | 3 | 17231.7 | XXX    |
| Can-NCFran    | 2 | 17475.5 | XXX    |
| Con-SCKo      | 3 | 17843.7 | XXX    |
| Can-PGRFran   | 3 | 17856.7 | XXX    |
| Ag-TendSud    | 3 | 18513.0 | XXX    |
| Dud-QAPMGeorg | 3 | 18599.0 | XXX    |
| Con-GMJJa     | 3 | 18716.3 | XXX    |
| In-CGBUSA     | 3 | 18828.7 | XXX    |
| In-LaEscrSp   | 2 | 19015.0 | XXX    |
| Flex-Co20Ind  | 3 | 19260.3 | XXX    |
| Am-YokIs      | 2 | 19575.5 | XXX    |
| Ag-WChInd     | 3 | 20748.7 | XXX    |
| Flex-SnakeSA  | 3 | 21895.0 | XXX    |
| Am-KizilUzbe  | 3 | 22390.3 | XXX    |
| Ag-CallInd    | 3 | 22558.7 | XXX    |
| Am-AnaFran    | 3 | 22780.0 | XXX    |
| Flex-AryaInd  | 3 | 22905.0 | XXX    |
| La-KroFran    | 4 | 23206.0 | XXX    |
| chate-CarIta  | 1 | 28279.0 | XXXX   |
| Can-TopUSA    | 3 | 28558.3 | XXX    |
| Can-VedFran   | 3 | 31823.0 | XXX    |
| In-TeSp       | 3 | 31950.7 | XXX    |
| Can-EanaHun   | 3 | 32201.7 | XXX    |
| Ac-G22843Se   | 3 | 32845.7 | XXX    |
| Can-DulUSA    | 3 | 37468.0 | XXX    |
| Mom-KhaInd    | 3 | 38187.3 | XXX    |
| Can-WiUSA     | 3 | 45766.7 | XXX    |
| Con-BaishChi  | 3 | 52059.7 | XXXX   |
| Mom-MR1Ind    | 3 | 92831.3 | X XX   |
| Can-NOFran    | 2 | 101151. | XXXXXX |
| Can-SucrFran  | 3 | 129127. | XXX    |
| La-CascaPor   | 2 | 151849. | XX     |
| Can-GyFran    | 2 | 191089. | X      |
| La-ZatIta     | 3 | 397975. | X      |

#### LSD analysis for P.11 per accessions

Method: 95.0 percentage LSD

| <i>accessions</i> | <i>Cases</i> | <i>Mean</i> | <i>Homogeneous groups</i> |
|-------------------|--------------|-------------|---------------------------|
|-------------------|--------------|-------------|---------------------------|

|                |   |         |            |
|----------------|---|---------|------------|
| Tibish-Ksud    | 3 | 54791.7 | X          |
| Am-TokTaj      | 3 | 55882.3 | XX         |
| In-ComunSp     | 2 | 57109.5 | XXXX       |
| In-TDewUSA     | 3 | 58842.3 | XXX        |
| Can-HBJUSA     | 3 | 66449.7 | XXXXXX     |
| Can-EfJa       | 3 | 67034.7 | XXXXXX     |
| Can-SucrFran   | 3 | 69206.3 | XXXXXX     |
| In-CrabPor     | 2 | 70981.0 | XXXXXXXX   |
| In-HoneyDewUSA | 3 | 73171.7 | XXXXXXXX   |
| Ac-SRKSLan     | 3 | 74080.0 | XXXXXXXXXX |
| Am-korcaRus    | 3 | 74419.3 | XXXXXXXXXX |
| In-BBredSp     | 3 | 74951.7 | XXXXXXXXXX |
| Can-GCHUSA     | 3 | 77641.3 | XXXXXXXXXX |
| Can-TopUSA     | 3 | 79061.3 | XXXXXXXXXX |
| Can-WiUSA      | 3 | 80133.0 | XXXXXXXXXX |
| In-BBescrSp    | 3 | 80461.7 | XXXXXXXXXX |
| In-TeNinvSp2   | 2 | 80630.0 | XXXXXXXXXX |
| La-CascaPor    | 2 | 80660.0 | XXXXXXXXXX |
| Dud-QPMAfg     | 3 | 81211.0 | XXXXXXXXXX |
| La-ErizoSp     | 3 | 81534.7 | XXXXXXXXXX |
| In-TeSp        | 3 | 81837.0 | XXXXXXXXXX |
| Chi-VellInd    | 3 | 82227.7 | XXXXXXXXXX |
| Can-SemUSA     | 2 | 82248.0 | XXXXXXXXXX |
| Con-MielChi    | 3 | 82361.7 | XXXXXXXXXX |
| In-RoMoch1Sp   | 3 | 82951.0 | XXXXXXXXXX |
| Ac-SVIIInd     | 2 | 83179.0 | XXXXXXXXXX |
| Con-PauPol     | 3 | 85501.0 | XXXXXXXXXX |
| In-AmAoroSp    | 2 | 85727.0 | XXXXXXXXXX |
| In-AmCañSp     | 3 | 86119.7 | XXXXXXXXXX |
| Can-NCFran     | 2 | 86159.0 | XXXXXXXXXX |
| Can-DulUSA     | 3 | 87004.3 | XXXXXXXXXX |
| La-ZatIta      | 3 | 87254.7 | XXXXXXXXXX |
| Ac-TGR1551Zimb | 3 | 87524.7 | XXXXXXXXXX |
| Am-AnaFran     | 3 | 88746.7 | XXXXXXXXXX |
| In-LaEscrSp    | 2 | 89044.5 | XXXXXXXXXX |
| Mom-MR1Ind     | 3 | 89270.0 | XXXXXXXXXX |
| Can-VedFran    | 3 | 92319.0 | XXXXXXXXXX |
| Mom-PII24Ind   | 3 | 92617.7 | XXXXXXXXXX |
| Con-FreeCJa    | 3 | 93314.0 | XXXXXXXXXX |
| Can-Ogen2Is    | 3 | 93406.7 | XXXXXXXXXX |
| Am-KafEgy      | 2 | 94833.0 | XXXXXXXXXX |
| Am-NesviGeor   | 3 | 95083.3 | XXXXXXXXXX |
| Am-HassanTur   | 3 | 95217.7 | XXXXXXXXXX |
| Con-ShiroJa    | 3 | 96021.3 | XXXXXXXXXX |
| La-KroFran     | 4 | 97515.8 | XXXXXXXXXX |
| Can-PearlJa    | 3 | 101288. | XXXXXXXXXX |
| In-PsPiñSp     | 3 | 102223. | XXXXXXXXXX |
| Can-NOFran     | 2 | 104986. | XXXXXXXXXX |
| La-OgenBul     | 3 | 105381. | XXXXXXXXXX |
| In-TeNinvSp    | 2 | 106489. | XXXXXXXXXX |
| Am-KizilUzbe   | 3 | 106749. | XXXXXXXXXX |
| Con-NanChi     | 3 | 107716. | XXXXXXXXXX |
| In-LaBolasSp   | 3 | 109513. | XXXXXXXXXX |
| Can-PGRFran    | 3 | 111081. | XXXXXXXXXX |
| Con-BaishChi   | 3 | 111410. | XXXXXXXXXX |
| Con-SCKo       | 3 | 114456. | XXXXXXXXXX |
| Mom-KhaInd     | 3 | 114459. | XXXXXXXXXX |

|               |   |         |            |
|---------------|---|---------|------------|
| Ac-G22843Se   | 3 | 114651. | XXXXXXXXXX |
| Flex-Co20Ind  | 3 | 118555. | XXXXXXXXXX |
| Ag-TendSud    | 3 | 124187. | XXXXXXXXXX |
| Can-EanaHun   | 3 | 124364. | XXXXXXXXXX |
| Ag-WChInd     | 3 | 126941. | XXXXXX     |
| Am-YokIs      | 2 | 129205. | XXXXXXXXXX |
| Flex-SnakeSA  | 3 | 132558. | XXXXXX     |
| Dud-QAPMGeorg | 3 | 132744. | XXXXXX     |
| Con-GMJJa     | 3 | 132921. | XXXX       |
| Ag-15591Gha   | 3 | 134197. | XXX        |
| Ag-CallInd    | 3 | 145011. | XXX        |
| Can-GyFran    | 2 | 150282. | XXX        |
| In-CGBUSA     | 3 | 164564. | XX         |
| Flex-AryaInd  | 3 | 188744. | XX         |
| chate-CarIta  | 1 | 250827. | X          |

#### LSD analysis for P.12 per accessions

Method: 95.0 percentage LSD

| <i>accessions</i> | <i>Cases</i> | <i>Mean</i> | <i>Homogeneous groups</i> |
|-------------------|--------------|-------------|---------------------------|
| In-CGBUSA         | 3            | 750.0       | X                         |
| In-HoneyDewUSA    | 3            | 750.0       | X                         |
| In-PsPiñSp        | 3            | 750.0       | X                         |
| Ac-SVIIInd        | 2            | 750.0       | XX                        |
| Can-HBJUSA        | 3            | 750.0       | X                         |
| Con-GMJJa         | 3            | 750.0       | X                         |
| Tibish-Ksud       | 3            | 750.0       | X                         |
| In-TeNinvSp       | 2            | 750.0       | XX                        |
| Ag-TendSud        | 3            | 750.0       | X                         |
| Con-FreeCJa       | 3            | 750.0       | X                         |
| Flex-Co20Ind      | 3            | 750.0       | X                         |
| Con-ShiroJa       | 3            | 750.0       | X                         |
| La-CascaPor       | 2            | 750.0       | XX                        |
| In-RoMoch1Sp      | 3            | 750.0       | X                         |
| Flex-SnakeSA      | 3            | 750.0       | X                         |
| Con-SCKo          | 3            | 750.0       | X                         |
| In-AmAoroSp       | 2            | 750.0       | XX                        |
| Ag-WChInd         | 3            | 750.0       | X                         |
| In-CrabPor        | 2            | 750.0       | XX                        |
| Ac-SRKSLan        | 3            | 750.0       | X                         |
| Ac-TGR1551Zimb    | 3            | 750.0       | X                         |
| Can-NCFran        | 2            | 750.0       | XX                        |
| In-BBredSp        | 3            | 750.0       | X                         |
| Dud-QPMAfg        | 3            | 1124.0      | X                         |
| In-LaEscrSp       | 2            | 1685.5      | XX                        |
| Con-NanChi        | 3            | 2008.0      | X                         |
| Con-PauPol        | 3            | 2019.0      | X                         |
| Can-SucrFran      | 3            | 2891.0      | X                         |
| Can-SemUSA        | 2            | 3057.5      | XX                        |
| chate-CarIta      | 1            | 3756.0      | XXX                       |
| In-BBescrSp       | 3            | 3970.67     | X                         |
| Can-WiUSA         | 3            | 4008.67     | X                         |
| Can-DulUSA        | 3            | 4038.0      | X                         |
| Con-MielChi       | 3            | 4258.0      | X                         |
| Mom-KhaInd        | 3            | 4524.0      | X                         |
| Dud-QAPMGeorg     | 3            | 5497.33     | XX                        |
| Ag-15591Gha       | 3            | 5610.0      | XX                        |

|              |   |         |         |
|--------------|---|---------|---------|
| La-ZatIta    | 3 | 5759.33 | XX      |
| Can-GyFran   | 2 | 6484.5  | XX      |
| Am-TokTaj    | 3 | 8046.0  | XX      |
| Can-EanaHun  | 3 | 11603.3 | XX      |
| Am-AnaFran   | 3 | 12550.0 | XX      |
| Can-PGRFran  | 3 | 14218.7 | XX      |
| Can-TopUSA   | 3 | 14376.7 | XX      |
| La-KroFran   | 4 | 15342.8 | XX      |
| Con-BaishChi | 3 | 16131.3 | XXX     |
| Am-HassanTur | 3 | 16352.0 | XXX     |
| In-AmCañSp   | 3 | 19266.7 | XXX     |
| In-ComunSp   | 2 | 23540.5 | XXX     |
| Am-KizilUzbe | 3 | 24523.7 | XXX     |
| Can-EfJa     | 3 | 25213.0 | XXX     |
| Am-NesviGeor | 3 | 27416.3 | XXX     |
| Ac-G22843Se  | 3 | 27884.3 | XXX     |
| Can-PearlJa  | 3 | 27899.7 | XXX     |
| Can-NOFran   | 2 | 28176.0 | XXX     |
| Can-VedFran  | 3 | 30044.7 | XXX     |
| In-TeNinvSp2 | 2 | 30600.5 | XXXX    |
| Can-Ogen2Is  | 3 | 31495.7 | XXX     |
| Am-korcaRus  | 3 | 33377.3 | XXX     |
| In-LaBolasSp | 3 | 38429.7 | XXXXX   |
| Mom-MR1Ind   | 3 | 42344.7 | XXXXX   |
| In-TDewUSA   | 3 | 45040.3 | XXXXX   |
| Chi-VellInd  | 3 | 46080.3 | XXXXX   |
| Flex-AryaInd | 3 | 51016.7 | XXXXXX  |
| Am-KafEgy    | 2 | 60340.0 | XXXXXXX |
| La-ErizoSp   | 3 | 62639.7 | XXXXX   |
| Can-GCHUSA   | 3 | 73139.3 | XXXXXX  |
| Mom-PII24Ind | 3 | 94936.0 | XXXXX   |
| La-OgenBul   | 3 | 108861. | XXX     |
| In-TeSp      | 3 | 121483. | XX      |
| Am-YokIs     | 2 | 133738. | X       |
| Ag-CallInd   | 3 | 215455. | X       |

#### LSD analysis for P.13 per accessions

Method: 95.0 percentage LSD

| <i>accessions</i> | <i>Cases</i> | <i>Mean</i> | <i>Homogeneous groups</i> |
|-------------------|--------------|-------------|---------------------------|
| In-PsPiñSp        | 3            | 750.0       | X                         |
| Flex-AryaInd      | 3            | 750.0       | X                         |
| Ac-TGR1551Zimb    | 3            | 750.0       | X                         |
| In-RoMoch1Sp      | 3            | 750.0       | X                         |
| Tibish-Ksud       | 3            | 750.0       | X                         |
| Con-ShiroJa       | 3            | 750.0       | X                         |
| In-CGBUSA         | 3            | 750.0       | X                         |
| Ac-SVIInd         | 2            | 1181.0      | XX                        |
| Ac-SRKSLan        | 3            | 1259.67     | X                         |
| Con-FreeCJa       | 3            | 1376.33     | X                         |
| Ag-WChInd         | 3            | 1914.33     | X                         |
| Flex-Co20Ind      | 3            | 2412.0      | X                         |
| In-AmAoroSp       | 2            | 3065.5      | XX                        |
| In-HoneyDewUSA    | 3            | 3259.67     | X                         |
| In-CrabPor        | 2            | 6423.0      | XX                        |
| Con-BaishChi      | 3            | 7451.0      | X                         |
| chate-CarIta      | 1            | 10259.0     | XXXXX                     |

|               |   |           |            |
|---------------|---|-----------|------------|
| In-AmCañSp    | 3 | 11268.3   | X          |
| Chi-VellInd   | 3 | 14948.7   | X          |
| Con-NanChi    | 3 | 15358.3   | X          |
| In-BBredSp    | 3 | 17916.7   | X          |
| Can-NCFran    | 2 | 18785.0   | XX         |
| In-TDewUSA    | 3 | 21612.0   | X          |
| Ag-CallInd    | 3 | 26002.3   | X          |
| Dud-QPMAfg    | 3 | 26205.3   | X          |
| Ag-TendSud    | 3 | 29247.3   | X          |
| Con-GMJJa     | 3 | 35134.3   | X          |
| Flex-SnakeSA  | 3 | 42006.0   | X          |
| Con-MielChi   | 3 | 51598.3   | X          |
| Con-SCKo      | 3 | 66154.3   | X          |
| Ag-15591Gha   | 3 | 76250.7   | X          |
| Ac-G22843Se   | 3 | 105781.   | X          |
| In-TeNinvSp   | 2 | 122337.   | XXX        |
| Con-PauPol    | 3 | 143239.   | X          |
| Mom-KhaInd    | 3 | 164349.   | X          |
| In-LaEscrSp   | 2 | 168119.   | XXX        |
| Can-PearlJa   | 3 | 176403.   | XX         |
| Can-EanaHun   | 3 | 214904.   | XX         |
| Am-KafEgy     | 2 | 237085.   | XXX        |
| Am-KizilUzbe  | 3 | 288784.   | XXX        |
| La-ZatlIta    | 3 | 379875.   | XXX        |
| In-BBescrSp   | 3 | 430577.   | XXXX       |
| Can-Ogen2Is   | 3 | 490840.   | XXXXXX     |
| In-TeNinvSp2  | 2 | 507717.   | XXXXXX     |
| Am-HassanTur  | 3 | 532570.   | XXXXXX     |
| Can-SucrFran  | 3 | 583609.   | XXXXXX     |
| Dud-QAPMGeorg | 3 | 627995.   | XXXXXX     |
| Am-TokTaj     | 3 | 657113.   | XXXXXX     |
| In-TeSp       | 3 | 695927.   | XXXXXX     |
| Mom-PII24Ind  | 3 | 701812.   | XXXXXX     |
| Can-VedFran   | 3 | 774362.   | XXXXXXXX   |
| La-ErizoSp    | 3 | 930301.   | XXXXXXXX   |
| Can-WiUSA     | 3 | 939247.   | XXXXXXXX   |
| Am-YokIs      | 2 | 989816.   | XXXXXXXXXX |
| Can-HBJUSA    | 3 | 1.11798E6 | XXXXXXXXXX |
| Can-NOFran    | 2 | 1.17331E6 | XXXXXXXXXX |
| In-ComunSp    | 2 | 1.22397E6 | XXXXXXXXXX |
| Mom-MR1Ind    | 3 | 1.50812E6 | XXXXXXXXXX |
| Can-GCHUSA    | 3 | 1.76771E6 | XXXXXXXXXX |
| In-LaBolasSp  | 3 | 1.82397E6 | XXXXXXXXXX |
| Can-TopUSA    | 3 | 2.02429E6 | XXXXXXXXXX |
| Am-NesviGeor  | 3 | 2.07821E6 | XXXXXXXXXX |
| Can-EfJa      | 3 | 2.32509E6 | XXXXXX     |
| Can-DulUSA    | 3 | 2.39071E6 | XXXXXX     |
| Can-PGRFran   | 3 | 2.62447E6 | XXXX       |
| Am-korcaRus   | 3 | 2.69581E6 | XXXX       |
| La-OgenBul    | 3 | 2.87005E6 | XXX        |
| Am-AnaFran    | 3 | 3.17171E6 | XX         |
| La-KroFran    | 4 | 3.36611E6 | X          |
| Can-SemUSA    | 2 | 5.77178E6 | X          |
| Can-GyFran    | 2 | 5.89257E6 | X          |
| La-CascaPor   | 2 | 5.89397E6 | X          |

LSD analysis for P.14 per accessions

Method: 95.0 percentage LSD

| <i>accessions</i> | <i>Cases</i> | <i>Mean</i> | <i>Homogeneous groups</i> |
|-------------------|--------------|-------------|---------------------------|
| Ac-SVIIInd        | 2            | 750.0       | XXX                       |
| Ac-SRKSLan        | 3            | 750.0       | X                         |
| In-TeNinvSp       | 2            | 750.0       | XXX                       |
| Con-FreeCJa       | 3            | 750.0       | X                         |
| In-RoMoch1Sp      | 3            | 750.0       | X                         |
| Ac-TGR1551Zimb    | 3            | 750.0       | X                         |
| chate-CarIta      | 1            | 750.0       | XXXXX                     |
| Con-MielChi       | 3            | 750.0       | X                         |
| Can-SucrFran      | 3            | 750.0       | X                         |
| Flex-Co20Ind      | 3            | 750.0       | X                         |
| Ag-CallInd        | 3            | 750.0       | X                         |
| Ag-TendSud        | 3            | 750.0       | X                         |
| In-CrabPor        | 2            | 750.0       | XXX                       |
| Flex-SnakeSA      | 3            | 750.0       | X                         |
| Con-NanChi        | 3            | 750.0       | X                         |
| In-BBescrSp       | 3            | 750.0       | X                         |
| In-ComunSp        | 2            | 750.0       | XXX                       |
| In-AmAoroSp       | 2            | 750.0       | XXX                       |
| In-PsPiñSp        | 3            | 750.0       | X                         |
| Can-TopUSA        | 3            | 750.0       | X                         |
| In-HoneyDewUSA    | 3            | 750.0       | X                         |
| Can-NCFran        | 2            | 750.0       | XXX                       |
| Tibish-Ksud       | 3            | 750.0       | X                         |
| Chi-VellInd       | 3            | 754.0       | X                         |
| Am-AnaFran        | 3            | 805.0       | X                         |
| Can-PGRFran       | 3            | 809.667     | X                         |
| Ag-WChInd         | 3            | 813.0       | X                         |
| In-CGBUSA         | 3            | 813.333     | X                         |
| Ag-15591Gha       | 3            | 1337.67     | X X                       |
| Can-SemUSA        | 2            | 1479.5      | XXX                       |
| Can-GyFran        | 2            | 2053.0      | XXX                       |
| Can-GCHUSA        | 3            | 2090.67     | X X                       |
| Dud-QPMAfg        | 3            | 2597.33     | X X                       |
| Flex-AryaInd      | 3            | 2745.33     | X X                       |
| Can-WiUSA         | 3            | 3558.0      | X X                       |
| Con-PauPol        | 3            | 3964.0      | X X                       |
| Can-HBJUSA        | 3            | 4003.0      | X X                       |
| In-LaEscrSp       | 2            | 4123.5      | XXX                       |
| Can-EanaHun       | 3            | 4125.33     | X X                       |
| Can-DulUSA        | 3            | 4870.67     | XXX                       |
| Con-SCKo          | 3            | 4885.0      | XXX                       |
| Mom-PII24Ind      | 3            | 4916.0      | XXX                       |
| La-ZatIta         | 3            | 5576.0      | XXX                       |
| Dud-QAPMGeorg     | 3            | 6522.67     | XXX                       |
| Am-KafEgy         | 2            | 6980.5      | XXXXX                     |
| Mom-KhaInd        | 3            | 7554.67     | XXX                       |
| In-BBredSp        | 3            | 8518.0      | XXX                       |
| Con-GMJJa         | 3            | 8663.67     | XXX                       |
| Can-EfJa          | 3            | 8881.0      | XXXXX                     |
| Can-Ogen2Is       | 3            | 9169.67     | XXXXX                     |
| Con-ShiroJa       | 3            | 9343.33     | XXXXX                     |
| Am-HassanTur      | 3            | 9702.67     | XXXXX                     |
| Am-korcaRus       | 3            | 11048.0     | XXXXX                     |
| Can-NOFran        | 2            | 11388.0     | XXXXX                     |

|              |   |         |        |
|--------------|---|---------|--------|
| Am-TokTaj    | 3 | 12326.7 | XXXX   |
| La-KroFran   | 4 | 13300.3 | XXXX   |
| Am-KizilUzbe | 3 | 14372.3 | XXXX   |
| La-CascaPor  | 2 | 14840.0 | XXXXXX |
| Can-VedFran  | 3 | 15253.3 | XXXX   |
| La-ErizoSp   | 3 | 19112.7 | XXXXXX |
| Can-PearlJa  | 3 | 20713.3 | XXXXXX |
| Mom-MR1Ind   | 3 | 23006.0 | XXXXXX |
| In-TDewUSA   | 3 | 26410.3 | XXXXXX |
| Am-NesviGeor | 3 | 26444.7 | XXXXXX |
| Ac-G22843Se  | 3 | 26574.7 | XXXXXX |
| In-TeNinvSp2 | 2 | 33554.5 | XXXXXX |
| In-LaBolasSp | 3 | 35771.0 | XXXXXX |
| In-TeSp      | 3 | 41616.0 | X XX   |
| Am-YokIs     | 2 | 42231.0 | XXXX   |
| Con-BaishChi | 3 | 45571.7 | XX     |
| In-AmCañSp   | 3 | 54363.3 | X      |
| La-OgenBul   | 3 | 55830.0 | X      |

#### LSD analysis for P.15 per accessions

Method: 95.0 percentage LSD

| <i>accessions</i> | <i>Cases</i> | <i>Mean</i> | <i>Homogeneous groups</i> |
|-------------------|--------------|-------------|---------------------------|
| Flex-SnakeSA      | 3            | 750.0       | X                         |
| Con-FreeCJa       | 3            | 750.0       | X                         |
| Con-BaishChi      | 3            | 750.0       | X                         |
| Ac-SRKSLan        | 3            | 750.0       | X                         |
| Con-GMJJa         | 3            | 750.0       | X                         |
| In-CrabPor        | 2            | 750.0       | X                         |
| Ac-SV1Ind         | 2            | 750.0       | X                         |
| In-BBredSp        | 3            | 750.0       | X                         |
| Con-ShiroJa       | 3            | 750.0       | X                         |
| Flex-Co20Ind      | 3            | 750.0       | X                         |
| Ag-15591Gha       | 3            | 750.0       | X                         |
| Con-NanChi        | 3            | 750.0       | X                         |
| In-RoMoch1Sp      | 3            | 750.0       | X                         |
| In-AmAoroSp       | 2            | 750.0       | X                         |
| Ac-TGR1551Zimb    | 3            | 750.0       | X                         |
| chate-CarIta      | 1            | 750.0       | XX                        |
| In-HoneyDewUSA    | 3            | 750.0       | X                         |
| In-PsPiñSp        | 3            | 750.0       | X                         |
| Dud-QPMAfg        | 3            | 750.0       | X                         |
| Ag-WChInd         | 3            | 750.0       | X                         |
| Ag-TendSud        | 3            | 750.0       | X                         |
| Can-NCFran        | 2            | 750.0       | X                         |
| Tibish-Ksud       | 3            | 750.0       | X                         |
| Chi-VellInd       | 3            | 750.0       | X                         |
| In-CGBUSA         | 3            | 750.0       | X                         |
| Con-MielChi       | 3            | 1098.33     | X                         |
| Con-PauPol        | 3            | 1165.67     | X                         |
| Ac-G22843Se       | 3            | 1301.33     | X                         |
| Can-EanaHun       | 3            | 1860.67     | X                         |
| Am-TokTaj         | 3            | 1869.0      | X                         |
| Can-PearlJa       | 3            | 2069.33     | X                         |
| Mom-KhaInd        | 3            | 2478.0      | X                         |
| Con-SCKo          | 3            | 2791.67     | X                         |
| Am-HassanTur      | 3            | 3233.0      | X                         |

|               |   |         |     |
|---------------|---|---------|-----|
| In-LaEscrSp   | 2 | 3406.0  | X   |
| In-BBescrSp   | 3 | 3566.33 | X   |
| In-TDewUSA    | 3 | 3797.0  | X   |
| In-TeNinvSp   | 2 | 4293.5  | X   |
| In-AmCañSp    | 3 | 4329.67 | X   |
| Am-KafEgy     | 2 | 6652.5  | X   |
| In-ComunSp    | 2 | 6774.5  | X   |
| Can-GCHUSA    | 3 | 6859.67 | X   |
| Can-PGRFran   | 3 | 7217.33 | X   |
| Can-HBJUSA    | 3 | 7962.33 | X   |
| Can-SucrFran  | 3 | 8246.33 | X   |
| Can-VedFran   | 3 | 8882.33 | X   |
| Can-WiUSA     | 3 | 8917.0  | X   |
| Can-EfJa      | 3 | 9272.0  | X   |
| Am-KizilUzbe  | 3 | 9522.67 | X   |
| In-TeSp       | 3 | 10309.7 | X   |
| La-ErizoSp    | 3 | 11531.0 | X   |
| Am-korcaRus   | 3 | 12127.0 | X   |
| La-CascaPor   | 2 | 13778.5 | X   |
| Can-NOFran    | 2 | 16710.0 | XX  |
| Am-AnaFran    | 3 | 16712.7 | X   |
| La-KroFran    | 4 | 17182.8 | X   |
| Dud-QAPMGeorg | 3 | 18561.7 | X   |
| Flex-AryaInd  | 3 | 20112.0 | X   |
| La-ZatIta     | 3 | 20835.0 | X   |
| Can-GyFran    | 2 | 31300.5 | XX  |
| Can-TopUSA    | 3 | 33357.7 | XX  |
| Mom-PII24Ind  | 3 | 35020.0 | XX  |
| Can-Ogen2Is   | 3 | 36677.7 | XX  |
| Can-DulUSA    | 3 | 39837.7 | XX  |
| In-LaBolasSp  | 3 | 44548.7 | XX  |
| In-TeNinvSp2  | 2 | 48095.0 | XX  |
| Am-YokIs      | 2 | 101023. | XXX |
| Can-SemUSA    | 2 | 101943. | XXX |
| Am-NesviGeor  | 3 | 121596. | XXX |
| Mom-MR1Ind    | 3 | 192275. | XXX |
| La-OgenBul    | 3 | 210065. | XX  |
| Ag-CallInd    | 3 | 282013. | X   |

#### LSD analysis for P.16 per accessions

Method: 95.0 percentage LSD

| <i>accessions</i> | <i>Cases</i> | <i>Mean</i> | <i>Homogeneous groups</i> |
|-------------------|--------------|-------------|---------------------------|
| La-ZatIta         | 3            | 750.0       | X                         |
| chate-CarIta      | 1            | 750.0       | XXX                       |
| Can-SucrFran      | 3            | 750.0       | X                         |
| Can-WiUSA         | 3            | 750.0       | X                         |
| In-RoMoch1Sp      | 3            | 750.0       | X                         |
| Ac-TGR1551Zimb    | 3            | 750.0       | X                         |
| Flex-AryaInd      | 3            | 750.0       | X                         |
| Can-GyFran        | 2            | 750.0       | XX                        |
| Ac-SVIInd         | 2            | 750.0       | XX                        |
| Ag-WChInd         | 3            | 750.0       | X                         |
| Con-ShiroJa       | 3            | 750.0       | X                         |
| Ac-SRKSLan        | 3            | 750.0       | X                         |
| In-CGBUSA         | 3            | 750.0       | X                         |
| Con-FreeCJa       | 3            | 750.0       | X                         |



|                |   |           |     |
|----------------|---|-----------|-----|
| In-AmAoroSp    | 2 | 1007.5    | XX  |
| Can-TopUSA     | 3 | 1024.67   | X   |
| Can-VedFran    | 3 | 1033.33   | X   |
| Can-GCHUSA     | 3 | 1097.67   | X   |
| Flex-SnakeSA   | 3 | 1132.67   | X   |
| In-PsPiñSp     | 3 | 1267.67   | X   |
| Can-NOFran     | 2 | 1375.5    | XX  |
| Am-AnaFran     | 3 | 1448.33   | X   |
| In-CrabPor     | 2 | 1509.5    | XX  |
| Am-KizilUzbe   | 3 | 1557.33   | X   |
| Am-YokIs       | 2 | 1635.0    | XX  |
| Tibish-Ksud    | 3 | 1638.67   | X   |
| Can-SemUSA     | 2 | 1694.0    | XX  |
| Can-Ogen2Is    | 3 | 2174.0    | X   |
| Flex-Co20Ind   | 3 | 2207.0    | X   |
| Can-PGRFran    | 3 | 2500.67   | X   |
| Mom-KhaInd     | 3 | 2765.33   | X   |
| Con-MielChi    | 3 | 3199.33   | X   |
| In-BBredSp     | 3 | 3458.67   | X   |
| Can-DulUSA     | 3 | 4342.33   | X   |
| La-CascaPor    | 2 | 4409.5    | XX  |
| In-TeNinvSp    | 2 | 5434.5    | XX  |
| In-HoneyDewUSA | 3 | 6602.33   | X   |
| Can-HBJUSA     | 3 | 6666.67   | X   |
| Am-HassanTur   | 3 | 7411.0    | X   |
| In-AmCañSp     | 3 | 7857.0    | X   |
| Can-EanaHun    | 3 | 10932.7   | X   |
| In-TeSp        | 3 | 18976.0   | X   |
| In-TeNinvSp2   | 2 | 21612.5   | XX  |
| Ag-TendSud     | 3 | 25701.7   | X   |
| In-LaEscrSp    | 2 | 30530.0   | XX  |
| Ag-15591Gha    | 3 | 41627.3   | X   |
| Con-GMJJa      | 3 | 47966.7   | X   |
| In-ComunSp     | 2 | 59725.0   | XX  |
| Am-TokTaj      | 3 | 64807.7   | X   |
| Can-PearlJa    | 3 | 72803.7   | X   |
| Con-SCKo       | 3 | 75538.7   | X   |
| Am-NesviGeor   | 3 | 79464.7   | XX  |
| Can-NCFran     | 2 | 88327.0   | XX  |
| In-TDewUSA     | 3 | 99732.0   | XX  |
| Con-BaishChi   | 3 | 110793.   | XX  |
| Ag-CallInd     | 3 | 120327.   | XX  |
| In-BBescrSp    | 3 | 122120.   | XX  |
| La-ErizoSp     | 3 | 143654.   | XX  |
| Am-KafEgy      | 2 | 149364.   | XX  |
| Con-NanChi     | 3 | 153803.   | XX  |
| La-KroFran     | 4 | 196756.   | XX  |
| Am-korcaRus    | 3 | 210104.   | XX  |
| Mom-PII24Ind   | 3 | 306484.   | XXX |
| Can-EfJa       | 3 | 333697.   | XXX |
| In-LaBolasSp   | 3 | 369651.   | XXX |
| Ac-G22843Se    | 3 | 515425.   | XXX |
| Dud-QAPMGeorg  | 3 | 661561.   | XXX |
| La-OgenBul     | 3 | 683845.   | XXX |
| Dud-QPMAfg     | 3 | 956703.   | XX  |
| Chi-VellInd    | 3 | 1.14006E6 | X   |
| Con-PauPol     | 3 | 3.36724E6 | X   |

|            |   |           |   |
|------------|---|-----------|---|
| Mom-MR1Ind | 3 | 3.40998E6 | X |
|------------|---|-----------|---|

# LSD analysis for P.17 per accessions

Method: 95.0 percentage LSD

| <i>accessions</i> | <i>Cases</i> | <i>Mean</i> | <i>Homogeneous groups</i> |
|-------------------|--------------|-------------|---------------------------|
| Ag-WChInd         | 3            | 750.0       | X                         |
| Con-ShiroJa       | 3            | 750.0       | X                         |
| Am-AnaFran        | 3            | 750.0       | X                         |
| Can-GCHUSA        | 3            | 750.0       | X                         |
| Flex-SnakeSA      | 3            | 750.0       | X                         |
| Can-GyFran        | 2            | 750.0       | X                         |
| In-TeNinvSp       | 2            | 750.0       | X                         |
| Flex-Co20Ind      | 3            | 750.0       | X                         |
| Can-NOFran        | 2            | 750.0       | X                         |
| Can-DulUSA        | 3            | 750.0       | X                         |
| In-AmAoroSp       | 2            | 750.0       | X                         |
| In-AmCañSp        | 3            | 750.0       | X                         |
| In-RoMoch1Sp      | 3            | 750.0       | X                         |
| Can-HBJUSA        | 3            | 750.0       | X                         |
| La-CascaPor       | 2            | 750.0       | X                         |
| Can-VedFran       | 3            | 750.0       | X                         |
| In-LaEscrSp       | 2            | 750.0       | X                         |
| Can-SucrFran      | 3            | 750.0       | X                         |
| Tibish-Ksud       | 3            | 750.0       | X                         |
| In-BBredSp        | 3            | 750.0       | X                         |
| In-CGBUSA         | 3            | 750.0       | X                         |
| Can-PGRFran       | 3            | 750.0       | X                         |
| Am-KizilUzbe      | 3            | 750.0       | X                         |
| In-CrabPor        | 2            | 750.0       | X                         |
| Ac-SVIIInd        | 2            | 750.0       | X                         |
| In-HoneyDewUSA    | 3            | 750.0       | X                         |
| Can-SemUSA        | 2            | 750.0       | X                         |
| chate-CarIta      | 1            | 750.0       | X                         |
| In-PsPiñSp        | 3            | 750.0       | X                         |
| Am-YokIs          | 2            | 750.0       | X                         |
| La-ZatIta         | 3            | 750.0       | X                         |
| Con-FreeCJa       | 3            | 750.0       | X                         |
| Can-WiUSA         | 3            | 750.0       | X                         |
| Ac-TGR1551Zimb    | 3            | 750.0       | X                         |
| Ac-SRKSLan        | 3            | 750.0       | X                         |
| Can-TopUSA        | 3            | 750.0       | X                         |
| Con-MielChi       | 3            | 770.333     | X                         |
| Flex-AryaInd      | 3            | 942.667     | X                         |
| Ag-15591Gha       | 3            | 985.333     | X                         |
| In-TeNinvSp2      | 2            | 1362.5      | X                         |
| Con-NanChi        | 3            | 1791.67     | X                         |
| In-TeSp           | 3            | 1806.0      | X                         |
| Mom-KhaInd        | 3            | 2027.67     | X                         |
| Am-HassanTur      | 3            | 2320.0      | X                         |
| Ag-CallInd        | 3            | 3140.33     | X                         |
| Can-Ogen2Is       | 3            | 3456.33     | X                         |
| Am-NesviGeor      | 3            | 4342.33     | X                         |
| Can-NCFran        | 2            | 6747.5      | X                         |
| Am-KafEgy         | 2            | 7138.0      | X                         |
| Con-SCKo          | 3            | 7249.67     | X                         |
| Con-GMJJa         | 3            | 7501.33     | X                         |

|               |   |         |     |
|---------------|---|---------|-----|
| In-ComunSp    | 2 | 8461.0  | X   |
| In-TDewUSA    | 3 | 10314.7 | X   |
| In-BBescrSp   | 3 | 10845.0 | X   |
| Con-BaishChi  | 3 | 11740.0 | X   |
| Am-TokTaj     | 3 | 13760.7 | X   |
| Ag-TendSud    | 3 | 14747.7 | X   |
| Can-EfJa      | 3 | 15809.7 | X   |
| La-ErizoSp    | 3 | 17733.3 | X   |
| Mom-PII24Ind  | 3 | 18505.0 | X   |
| Am-korcaRus   | 3 | 19293.3 | X   |
| Can-EanaHun   | 3 | 21123.7 | X   |
| Can-PearlJa   | 3 | 21465.7 | X   |
| Ac-G22843Se   | 3 | 21878.7 | X   |
| La-KroFran    | 4 | 22811.5 | X   |
| Dud-QAPMGeorg | 3 | 36825.3 | X   |
| In-LaBolasSp  | 3 | 48789.0 | X   |
| La-OgenBul    | 3 | 75487.7 | XX  |
| Dud-QPMAfg    | 3 | 82611.7 | XXX |
| Mom-MRIInd    | 3 | 188916. | XXX |
| Con-PauPol    | 3 | 194981. | XX  |
| Chi-VellInd   | 3 | 298717. | X   |

#### LSD analysis for S.1 per accessions

Method: 95.0 percentage LSD

| <i>accessions</i> | <i>Cases</i> | <i>Mean</i> | <i>Homogeneous groups</i> |
|-------------------|--------------|-------------|---------------------------|
| La-ZatIta         | 3            | 750.0       | XX                        |
| Flex-AryaInd      | 3            | 750.0       | XX                        |
| In-AmCañSp        | 3            | 750.0       | XX                        |
| Con-ShiroJa       | 3            | 750.0       | XX                        |
| Can-GyFran        | 2            | 750.0       | XXXX                      |
| In-TeSp           | 3            | 750.0       | XX                        |
| chate-CarIta      | 1            | 750.0       | XXXXXXX                   |
| Con-BaishChi      | 3            | 750.0       | XX                        |
| In-RoMochISp      | 3            | 750.0       | XX                        |
| Flex-SnakeSA      | 3            | 750.0       | XX                        |
| In-PsPiñSp        | 3            | 750.0       | XX                        |
| In-LaBolasSp      | 3            | 750.0       | XX                        |
| Con-GMJJa         | 3            | 750.0       | XX                        |
| In-CrabPor        | 2            | 750.0       | XXXX                      |
| Tibish-Ksud       | 3            | 750.0       | XX                        |
| In-CGBUSA         | 3            | 750.0       | XX                        |
| Am-HassanTur      | 3            | 750.0       | XX                        |
| In-HoneyDewUSA    | 3            | 750.0       | XX                        |
| Con-FreeCJa       | 3            | 750.0       | XX                        |
| Ag-TendSud        | 3            | 750.0       | XX                        |
| In-AmAoroSp       | 2            | 750.0       | XXXX                      |
| Ag-15591Gha       | 3            | 750.0       | XX                        |
| Con-SCKo          | 3            | 750.0       | XX                        |
| Ag-WChInd         | 3            | 750.0       | XX                        |
| Ac-SVIInd         | 2            | 750.0       | XXXX                      |
| Ac-SRKSLan        | 3            | 1286.33     | XX                        |
| In-LaEscrSp       | 2            | 1792.5      | XXXX                      |
| In-TeNinvSp       | 2            | 2383.0      | XXXX                      |
| Ac-G22843Se       | 3            | 2451.67     | XX                        |
| Ac-TGR1551Zimb    | 3            | 2644.67     | XX                        |
| Can-NOFran        | 2            | 2678.5      | XXXX                      |

|               |   |         |          |
|---------------|---|---------|----------|
| Am-KafEgy     | 2 | 2719.5  | XXXX     |
| In-TDewUSA    | 3 | 3105.33 | XX       |
| Can-EanaHun   | 3 | 3400.0  | XX       |
| In-BBescrSp   | 3 | 4110.33 | XX       |
| In-ComunSp    | 2 | 4851.0  | XXXX     |
| In-TeNinvSp2  | 2 | 5021.0  | XXXX     |
| La-KroFran    | 4 | 5458.25 | X        |
| Am-korcaRus   | 3 | 6621.67 | XXX      |
| Con-NanChi    | 3 | 7772.67 | XXX      |
| Con-MielChi   | 3 | 8187.0  | XXX      |
| Flex-Co20Ind  | 3 | 8306.0  | XXX      |
| Am-TokTaj     | 3 | 8645.33 | XXX      |
| Can-VedFran   | 3 | 8751.67 | XXX      |
| Can-NCFran    | 2 | 9193.5  | XXXX     |
| Can-WiUSA     | 3 | 9247.0  | XXX      |
| Ag-CallInd    | 3 | 11332.7 | XXX      |
| Can-SucrFran  | 3 | 15518.7 | XXX      |
| Can-PearlJa   | 3 | 21441.7 | XXXX     |
| Chi-VellInd   | 3 | 24744.7 | XXXX     |
| Dud-QPMAfg    | 3 | 26222.7 | XXXX     |
| Can-EfJa      | 3 | 26263.0 | XXXX     |
| Con-PauPol    | 3 | 33750.0 | XXXX     |
| La-CascaPor   | 2 | 36589.0 | XXXXXX   |
| Am-KizilUzbe  | 3 | 37659.0 | XXXX     |
| Can-GCHUSA    | 3 | 42197.3 | XXXX     |
| Can-DulUSA    | 3 | 54091.7 | XXXXXX   |
| Can-TopUSA    | 3 | 55018.7 | XXXXXX   |
| Dud-QAPMGeorg | 3 | 91212.7 | XXXXXXXX |
| La-ErizoSp    | 3 | 95035.3 | XXXXXXXX |
| Mom-PII24Ind  | 3 | 134379. | XXXXXXXX |
| Can-PGRFran   | 3 | 137197. | XXXXXXXX |
| Am-NesviGeor  | 3 | 151181. | XXXXXXXX |
| Am-AnaFran    | 3 | 172598. | XXXXXXXX |
| Mom-KhaInd    | 3 | 180088. | XXXXXX   |
| Can-SemUSA    | 2 | 213049. | XXXX     |
| Can-HBJUSA    | 3 | 222679. | XXX      |
| In-BBredSp    | 3 | 239336. | XX       |
| Mom-MRIInd    | 3 | 251889. | X        |
| Can-Ogen2Is   | 3 | 545660. | X        |
| Am-YokIs      | 2 | 729858. | XX       |
| La-OgenBul    | 3 | 825707. | X        |

#### LSD analysis for S.2 per accessions

Method: 95.0 percentage LSD

| <i>accessions</i> | <i>Cases</i> | <i>Mean</i> | <i>Homogeneous groups</i> |
|-------------------|--------------|-------------|---------------------------|
| In-TeNinvSp       | 2            | 750.0       | X                         |
| Ag-TendSud        | 3            | 750.0       | X                         |
| Flex-Co20Ind      | 3            | 750.0       | X                         |
| Ac-SRKSLan        | 3            | 750.0       | X                         |
| Flex-SnakeSA      | 3            | 750.0       | X                         |
| Con-GMJJa         | 3            | 750.0       | X                         |
| In-AmAoroSp       | 2            | 750.0       | X                         |
| chate-CarIta      | 1            | 750.0       | XXX                       |
| Con-MielChi       | 3            | 750.0       | X                         |
| Con-FreeCJa       | 3            | 750.0       | X                         |
| In-AmCañSp        | 3            | 750.0       | X                         |

|                |   |         |        |
|----------------|---|---------|--------|
| Tibish-Ksud    | 3 | 750.0   | X      |
| Con-NanChi     | 3 | 750.0   | X      |
| Con-PauPol     | 3 | 750.0   | X      |
| In-HoneyDewUSA | 3 | 750.0   | X      |
| In-CrabPor     | 2 | 750.0   | X      |
| Can-EanaHun    | 3 | 750.0   | X      |
| Ac-TGR1551Zimb | 3 | 750.0   | X      |
| In-CGBUSA      | 3 | 750.0   | X      |
| Con-ShiroJa    | 3 | 750.0   | X      |
| Con-SCKo       | 3 | 750.0   | X      |
| Ac-SVIIInd     | 2 | 750.0   | X      |
| Am-KizilUzbe   | 3 | 750.0   | X      |
| Ag-CallInd     | 3 | 750.0   | X      |
| Ag-WChInd      | 3 | 750.0   | X      |
| In-RoMoch1Sp   | 3 | 750.0   | X      |
| Con-BaishChi   | 3 | 750.0   | X      |
| In-PsPiñSp     | 3 | 750.0   | X      |
| Can-SucrFran   | 3 | 750.0   | X      |
| Ac-G22843Se    | 3 | 750.0   | X      |
| La-KroFran     | 4 | 2641.25 | X      |
| In-TDewUSA     | 3 | 3815.0  | X      |
| In-TeSp        | 3 | 4240.67 | X      |
| Can-NCFran     | 2 | 5092.5  | X      |
| La-CascaPor    | 2 | 5325.5  | X      |
| La-ZatIta      | 3 | 6489.67 | X      |
| In-TeNinvSp2   | 2 | 7016.0  | X      |
| Can-NOFran     | 2 | 8557.5  | X      |
| Flex-AryaInd   | 3 | 11178.3 | X      |
| Mom-PII24Ind   | 3 | 12739.3 | X      |
| Am-HassanTur   | 3 | 13503.3 | X      |
| Ag-15591Gha    | 3 | 14614.0 | X      |
| Chi-VellInd    | 3 | 16509.3 | X      |
| Can-EfJa       | 3 | 18994.3 | X      |
| In-BBescrSp    | 3 | 23886.3 | X      |
| Am-korcaRus    | 3 | 24212.3 | X      |
| In-LaBolasSp   | 3 | 24584.0 | X      |
| Dud-QPMAfg     | 3 | 25652.3 | X      |
| Am-TokTaj      | 3 | 25869.0 | X      |
| La-OgenBul     | 3 | 35003.7 | XX     |
| In-ComunSp     | 2 | 37686.0 | XXX    |
| Can-WiUSA      | 3 | 41990.0 | XXX    |
| Can-GyFran     | 2 | 44316.0 | XXX    |
| Can-VedFran    | 3 | 49878.3 | XXX    |
| Can-DulUSA     | 3 | 53540.3 | XXX    |
| Can-PearlJa    | 3 | 58266.0 | XXXX   |
| In-LaEscrSp    | 2 | 66705.5 | XXXXX  |
| Can-TopUSA     | 3 | 73187.3 | XXXXX  |
| La-ErizoSp     | 3 | 75556.0 | XXXXX  |
| Dud-QAPMGeorg  | 3 | 76328.3 | XXXXX  |
| Mom-MR1Ind     | 3 | 107691. | XXXXXX |
| Am-KafEgy      | 2 | 128941. | XXXXXX |
| Can-GCHUSA     | 3 | 152746. | XXXXXX |
| Can-HBJUSA     | 3 | 154436. | XXXXXX |
| Mom-KhaInd     | 3 | 155918. | XXXXXX |
| Am-AnaFran     | 3 | 157119. | XXXXX  |
| Can-PGRFran    | 3 | 184212. | XXX    |
| Can-SemUSA     | 2 | 193228. | XXXX   |

|              |   |         |    |
|--------------|---|---------|----|
| Can-Ogen2Is  | 3 | 214286. | XX |
| Am-NesviGeor | 3 | 267547. | X  |
| In-BBredSp   | 3 | 411565. | X  |
| Am-YokIs     | 2 | 672573. | X  |

### LSD analysis for S.3 per accessions

Method: 95.0 percentage LSD

| <i>accessions</i> | <i>Cases</i> | <i>Mean</i> | <i>Homogeneous groups</i> |
|-------------------|--------------|-------------|---------------------------|
| In-CGBUSA         | 3            | 750.0       | X                         |
| Am-KizilUzbe      | 3            | 750.0       | X                         |
| In-ComunSp        | 2            | 750.0       | XXX                       |
| In-HoneyDewUSA    | 3            | 750.0       | X                         |
| In-TeNinvSp       | 2            | 750.0       | XXX                       |
| In-CrabPor        | 2            | 750.0       | XXX                       |
| In-PsPiñSp        | 3            | 750.0       | X                         |
| In-LaEscrSp       | 2            | 750.0       | XXX                       |
| Ag-TendSud        | 3            | 750.0       | X                         |
| In-RoMoch1Sp      | 3            | 750.0       | X                         |
| Ac-G22843Se       | 3            | 750.0       | X                         |
| Con-BaishChi      | 3            | 750.0       | X                         |
| Ac-SVIIInd        | 2            | 750.0       | XXX                       |
| In-LaBolasSp      | 3            | 750.0       | X                         |
| In-TeSp           | 3            | 750.0       | X                         |
| La-KroFran        | 4            | 750.0       | X                         |
| In-TDewUSA        | 3            | 750.0       | X                         |
| Ac-TGR1551Zimb    | 3            | 750.0       | X                         |
| Ac-SRKSLan        | 3            | 750.0       | X                         |
| La-CascaPor       | 2            | 750.0       | XXX                       |
| Am-KafEgy         | 2            | 750.0       | XXX                       |
| Ag-15591Gha       | 3            | 750.0       | X                         |
| Can-NOFran        | 2            | 750.0       | XXX                       |
| Ag-CalInd         | 3            | 750.0       | X                         |
| chate-CarIta      | 1            | 750.0       | XXXX                      |
| Ag-WChInd         | 3            | 750.0       | X                         |
| Am-TokTaj         | 3            | 750.0       | X                         |
| Can-SucrFran      | 3            | 750.0       | X                         |
| Mom-PII24Ind      | 3            | 750.0       | X                         |
| La-ZatIta         | 3            | 750.0       | X                         |
| Am-korcaRus       | 3            | 750.0       | X                         |
| Can-WiUSA         | 3            | 750.0       | X                         |
| Tibish-Ksud       | 3            | 750.0       | X                         |
| Con-FreeCJa       | 3            | 750.0       | X                         |
| Con-GMJJa         | 3            | 750.0       | X                         |
| Con-MielChi       | 3            | 750.0       | X                         |
| Con-NanChi        | 3            | 750.0       | X                         |
| Con-PauPol        | 3            | 750.0       | X                         |
| Con-SCKo          | 3            | 750.0       | X                         |
| Con-ShiroJa       | 3            | 750.0       | X                         |
| Can-GyFran        | 2            | 750.0       | XXX                       |
| Am-HassanTur      | 3            | 750.0       | X                         |
| Flex-AryaInd      | 3            | 750.0       | X                         |
| Flex-Co20Ind      | 3            | 750.0       | X                         |
| Flex-SnakeSA      | 3            | 750.0       | X                         |
| In-AmAoroSp       | 2            | 750.0       | XXX                       |
| In-AmCañSp        | 3            | 750.0       | X                         |
| In-BBescrSp       | 3            | 750.0       | X                         |

|               |   |         |        |
|---------------|---|---------|--------|
| Can-VedFran   | 3 | 1486.0  | XX     |
| Can-EanaHun   | 3 | 1755.33 | XX     |
| Can-NCFran    | 2 | 2002.0  | XXX    |
| In-TeNinvSp2  | 2 | 2222.5  | XXX    |
| Chi-VellInd   | 3 | 4993.67 | XXX    |
| Can-PearlJa   | 3 | 5399.67 | XXX    |
| Can-EfJa      | 3 | 8245.67 | XXX    |
| Dud-QPMAfg    | 3 | 8609.33 | XXX    |
| La-OgenBul    | 3 | 10930.3 | XXX    |
| Can-GCHUSA    | 3 | 11345.0 | XXX    |
| Can-TopUSA    | 3 | 13263.0 | XXX    |
| Can-DulUSA    | 3 | 14994.7 | XXXX   |
| Dud-QAPMGeorg | 3 | 23870.7 | XXXXX  |
| La-ErizoSp    | 3 | 24075.3 | XXXXX  |
| Mom-MRlInd    | 3 | 34058.3 | XXXXX  |
| Mom-KhaInd    | 3 | 44018.0 | XXXXXX |
| Am-NesviGeor  | 3 | 48476.0 | XXXXXX |
| Am-AnaFran    | 3 | 49265.0 | XXXX   |
| Can-PGRFran   | 3 | 61070.0 | XXXX   |
| Can-SemUSA    | 2 | 72398.0 | XXX    |
| Can-Ogen2Is   | 3 | 83302.3 | XX     |
| Can-HBJUSA    | 3 | 85330.7 | XX     |
| In-BBredSp    | 3 | 104938. | X      |
| Am-YokIs      | 2 | 326848. | X      |

#### LSD analysis for S.4 per accessions

Method: 95.0 percentage LSD

| <i>accessions</i> | <i>Cases</i> | <i>Mean</i> | <i>Homogeneous groups</i> |
|-------------------|--------------|-------------|---------------------------|
| In-CrabPor        | 2            | 750.0       | XXX                       |
| Ac-SRKSLan        | 3            | 750.0       | X                         |
| Ac-TGR1551Zimb    | 3            | 750.0       | X                         |
| In-HoneyDewUSA    | 3            | 750.0       | X                         |
| Can-PearlJa       | 3            | 750.0       | X                         |
| Con-ShiroJa       | 3            | 750.0       | X                         |
| In-BBredSp        | 3            | 750.0       | X                         |
| In-AmCañSp        | 3            | 750.0       | X                         |
| In-TDewUSA        | 3            | 750.0       | X                         |
| La-CascaPor       | 2            | 750.0       | XXX                       |
| Mom-KhaInd        | 3            | 750.0       | X                         |
| In-AmAoroSp       | 2            | 750.0       | XXX                       |
| Am-AnaFran        | 3            | 768.333     | X                         |
| Con-BaishChi      | 3            | 818.667     | X                         |
| Can-TopUSA        | 3            | 826.667     | X                         |
| Can-HBJUSA        | 3            | 866.333     | X                         |
| Can-SemUSA        | 2            | 2026.0      | XXX                       |
| Mom-PII24Ind      | 3            | 3175.67     | X                         |
| Con-MielChi       | 3            | 3725.33     | X                         |
| Con-GMJJa         | 3            | 3990.67     | X                         |
| In-BBescrSp       | 3            | 4149.33     | X                         |
| Can-EfJa          | 3            | 4695.0      | X                         |
| Chi-VellInd       | 3            | 5212.0      | XX                        |
| Am-KizilUzbe      | 3            | 6186.67     | XX                        |
| In-TeNinvSp2      | 2            | 6769.0      | XXX                       |
| Ac-SVIIInd        | 2            | 7343.0      | XXX                       |
| Dud-QPMAfg        | 3            | 8358.33     | XXX                       |
| Can-SucrFran      | 3            | 9468.0      | XXX                       |

|               |   |         |        |
|---------------|---|---------|--------|
| In-RoMoch1Sp  | 3 | 10329.3 | XXX    |
| Can-VedFran   | 3 | 10810.3 | XXX    |
| Can-EanaHun   | 3 | 11023.7 | XXX    |
| Con-FreeCJa   | 3 | 11169.3 | XXX    |
| In-TeNinvSp   | 2 | 11710.5 | XXX    |
| La-OgenBul    | 3 | 12220.3 | XXX    |
| In-TeSp       | 3 | 12794.0 | XXX    |
| chate-Carlta  | 1 | 12835.0 | XXX    |
| Flex-SnakeSA  | 3 | 13535.3 | XXX    |
| Can-WiUSA     | 3 | 14249.7 | XXX    |
| Flex-Co20Ind  | 3 | 16199.3 | XXX    |
| Am-TokTaj     | 3 | 16318.3 | XXX    |
| Con-NanChi    | 3 | 16620.0 | XXX    |
| Can-DulUSA    | 3 | 17774.0 | XXX    |
| In-CGBUSA     | 3 | 18659.7 | XXX    |
| Can-GyFran    | 2 | 20042.5 | XXX    |
| In-LaEscrSp   | 2 | 21800.0 | XXX    |
| Am-korcaRus   | 3 | 23504.3 | XXX    |
| Can-Ogen2Is   | 3 | 25713.0 | XXX    |
| La-ZatIta     | 3 | 26030.0 | XXX    |
| Ag-15591Gha   | 3 | 29365.3 | XXX    |
| La-ErizoSp    | 3 | 29441.3 | XXX    |
| Ac-G22843Se   | 3 | 31355.7 | XXX    |
| Mom-MR1Ind    | 3 | 31412.7 | XXX    |
| Am-HassanTur  | 3 | 31467.3 | XXX    |
| Can-GCHUSA    | 3 | 35568.0 | XXX    |
| Am-KafEgy     | 2 | 43695.5 | XXXX   |
| In-PsPiñSp    | 3 | 43769.7 | XXX    |
| Ag-CallInd    | 3 | 46209.7 | XXX    |
| Ag-WChInd     | 3 | 46531.3 | XXX    |
| Tibish-Ksud   | 3 | 47050.3 | XXX    |
| Ag-TendSud    | 3 | 47581.0 | XXX    |
| Dud-QAPMGeorg | 3 | 56582.3 | XXXX   |
| Am-YokIs      | 2 | 58112.5 | XXXXXX |
| Can-NCFran    | 2 | 60775.0 | XXXXXX |
| In-LaBolasSp  | 3 | 71473.0 | XXXXXX |
| Can-PGRFran   | 3 | 79065.3 | XXXX   |
| Flex-AryaInd  | 3 | 80570.0 | XXX    |
| La-KroFran    | 4 | 120311. | XXX    |
| Con-SCKo      | 3 | 121882. | XXX    |
| Con-PauPol    | 3 | 135645. | XX     |
| In-ComunSp    | 2 | 172782. | X      |
| Can-NOFran    | 2 | 175579. | X      |
| Am-NesviGeor  | 3 | 186007. | X      |

#### LSD analysis for S.5 per accessions

Method: 95.0 percentage LSD

| <i>accessions</i> | <i>Cases</i> | <i>Mean</i> | <i>Homogeneous groups</i> |
|-------------------|--------------|-------------|---------------------------|
| Con-NanChi        | 3            | 750.0       | XX                        |
| Tibish-Ksud       | 3            | 750.0       | XX                        |
| In-AmAoroSp       | 2            | 750.0       | XX                        |
| Con-ShiroJa       | 3            | 750.0       | XX                        |
| Con-SCKo          | 3            | 750.0       | XX                        |
| Am-HassanTur      | 3            | 750.0       | XX                        |
| In-HoneyDewUSA    | 3            | 750.0       | XX                        |
| Can-NOFran        | 2            | 750.0       | XX                        |



|                |   |         |         |
|----------------|---|---------|---------|
| Ag-TendSud     | 3 | 750.0   | XX      |
| Flex-AryaInd   | 3 | 750.0   | XX      |
| Can-GyFran     | 2 | 750.0   | XX      |
| Con-BaishChi   | 3 | 750.0   | XX      |
| In-AmCañSp     | 3 | 750.0   | XX      |
| Flex-SnakeSA   | 3 | 750.0   | XX      |
| In-RoMoch1Sp   | 3 | 750.0   | XX      |
| In-LaEscrSp    | 2 | 750.0   | XX      |
| In-CrabPor     | 2 | 750.0   | XX      |
| In-TeSp        | 3 | 750.0   | XX      |
| Ac-SRKSLan     | 3 | 750.0   | XX      |
| La-CascaPor    | 2 | 750.0   | XX      |
| Con-FreeCJa    | 3 | 750.0   | XX      |
| Ag-15591Gha    | 3 | 750.0   | XX      |
| Am-KizilUzbe   | 3 | 750.0   | XX      |
| Ag-CallInd     | 3 | 750.0   | XX      |
| Ag-WChInd      | 3 | 750.0   | XX      |
| In-TeNinvSp    | 2 | 750.0   | XX      |
| Ac-SVIIInd     | 2 | 750.0   | XX      |
| In-PsPiñSp     | 3 | 750.0   | XX      |
| In-CGBUSA      | 3 | 750.0   | XX      |
| chate-CarIta   | 1 | 750.0   | XXXXXX  |
| Can-SucrFran   | 3 | 750.0   | XX      |
| La-KroFran     | 4 | 750.0   | X       |
| Ac-TGR1551Zimb | 3 | 750.0   | XX      |
| La-ZatIta      | 3 | 750.0   | XX      |
| Con-GMJJa      | 3 | 750.0   | XX      |
| Con-MielChi    | 3 | 750.0   | XX      |
| Flex-Co20Ind   | 3 | 1383.33 | XX      |
| Ac-G22843Se    | 3 | 2451.67 | XX      |
| In-LaBolasSp   | 3 | 2553.0  | XX      |
| Am-KafEgy      | 2 | 2765.0  | XXX     |
| In-TeNinvSp2   | 2 | 3565.5  | XXX     |
| In-BBescrSp    | 3 | 3645.67 | XX      |
| Can-EanaHun    | 3 | 3702.0  | XX      |
| In-TDewUSA     | 3 | 4037.67 | XX      |
| Can-WiUSA      | 3 | 4279.67 | XX      |
| Con-PauPol     | 3 | 5331.0  | XX      |
| In-ComunSp     | 2 | 5477.0  | XXX     |
| Can-NCFran     | 2 | 5810.0  | XXX     |
| Am-TokTaj      | 3 | 6648.33 | XX      |
| Can-VedFran    | 3 | 7495.33 | XX      |
| Mom-PII24Ind   | 3 | 14553.3 | XX      |
| Am-korcaRus    | 3 | 17020.0 | XX      |
| Dud-QPMAfg     | 3 | 26204.3 | XXX     |
| Chi-VellInd    | 3 | 26891.7 | XXX     |
| La-OgenBul     | 3 | 27533.3 | XXX     |
| Can-PearlJa    | 3 | 30142.0 | XXX     |
| Can-EfJa       | 3 | 44963.0 | XXX     |
| Can-GCHUSA     | 3 | 54350.0 | XXXX    |
| Can-TopUSA     | 3 | 64131.0 | XXXX    |
| Can-DulUSA     | 3 | 73678.3 | XXXXX   |
| Dud-QAPMGeorg  | 3 | 83209.0 | XXXXX   |
| La-ErizoSp     | 3 | 138336. | XXXXXXX |
| Am-NesviGeor   | 3 | 163694. | XXXXXX  |
| Mom-MR1Ind     | 3 | 185050. | XXXX    |
| Can-PGRFran    | 3 | 210577. | XXX     |

|             |   |           |     |
|-------------|---|-----------|-----|
| Am-AnaFran  | 3 | 229021.   | XXX |
| Can-Ogen2Is | 3 | 256541.   | XX  |
| Mom-KhaInd  | 3 | 269445.   | XXX |
| Can-SemUSA  | 2 | 399766.   | XXX |
| Can-HBJUSA  | 3 | 424335.   | XX  |
| In-BBredSp  | 3 | 561230.   | X   |
| Am-YokIs    | 2 | 1.29187E6 | X   |

#### LSD analysis for S.6 per accessions

Method: 95.0 percentage LSD

| <i>accessions</i> | <i>Cases</i> | <i>Mean</i> | <i>Homogeneous groups</i> |
|-------------------|--------------|-------------|---------------------------|
| Con-GMJJa         | 3            | 750.0       | X                         |
| Con-MielChi       | 3            | 750.0       | X                         |
| Flex-SnakeSA      | 3            | 750.0       | X                         |
| Con-NanChi        | 3            | 750.0       | X                         |
| Con-SCKo          | 3            | 750.0       | X                         |
| Con-PauPol        | 3            | 750.0       | X                         |
| Am-KizilUzbe      | 3            | 750.0       | X                         |
| Can-NOFran        | 2            | 750.0       | XXXX                      |
| Ag-CallInd        | 3            | 750.0       | X                         |
| Can-GyFran        | 2            | 750.0       | XXXX                      |
| In-AmAoroSp       | 2            | 750.0       | XXXX                      |
| Con-FreeCJa       | 3            | 750.0       | X                         |
| Con-ShiroJa       | 3            | 750.0       | X                         |
| Am-HassanTur      | 3            | 750.0       | X                         |
| In-LaBolasSp      | 3            | 750.0       | X                         |
| In-HoneyDewUSA    | 3            | 750.0       | X                         |
| In-TeNinvSp       | 2            | 750.0       | XXXX                      |
| Ac-SRKSLan        | 3            | 750.0       | X                         |
| Tibish-Ksud       | 3            | 750.0       | X                         |
| In-TeSp           | 3            | 750.0       | X                         |
| Flex-AryaInd      | 3            | 750.0       | X                         |
| Ag-15591Gha       | 3            | 750.0       | X                         |
| In-AmCañSp        | 3            | 750.0       | X                         |
| Ag-WChInd         | 3            | 750.0       | X                         |
| La-ZatIta         | 3            | 750.0       | X                         |
| Con-BaishChi      | 3            | 750.0       | X                         |
| In-RoMoch1Sp      | 3            | 750.0       | X                         |
| Ac-SVIIInd        | 2            | 750.0       | XXXX                      |
| In-CrabPor        | 2            | 750.0       | XXXX                      |
| In-CGBUSA         | 3            | 750.0       | X                         |
| In-PsPiñSp        | 3            | 750.0       | X                         |
| Can-SucrFran      | 3            | 750.0       | X                         |
| Ac-TGR1551Zimb    | 3            | 750.0       | X                         |
| chate-CarIta      | 1            | 750.0       | XXXXXX                    |
| Flex-Co20Ind      | 3            | 1551.67     | X                         |
| In-LaEscrSp       | 2            | 1667.5      | XXXX                      |
| Am-KafEgy         | 2            | 2015.5      | XXXX                      |
| In-BBescrSp       | 3            | 2204.0      | X                         |
| La-CascaPor       | 2            | 2546.5      | XXXX                      |
| In-TDewUSA        | 3            | 2638.0      | X                         |
| In-TeNinvSp2      | 2            | 2711.0      | XXXX                      |
| La-KroFran        | 4            | 3135.25     | X                         |
| Can-EanaHun       | 3            | 3189.33     | X                         |
| Ac-G22843Se       | 3            | 3259.33     | X                         |
| Can-WiUSA         | 3            | 4142.67     | X                         |

|               |   |           |        |
|---------------|---|-----------|--------|
| In-ComunSp    | 2 | 5092.0    | XXXX   |
| Ag-TendSud    | 3 | 6118.33   | XX     |
| Am-korcaRus   | 3 | 7838.33   | XX     |
| Can-NCFran    | 2 | 9561.5    | XXXX   |
| Am-TokTaj     | 3 | 9644.33   | XXX    |
| La-OgenBul    | 3 | 11923.7   | XXX    |
| Can-VedFran   | 3 | 18604.0   | XXXX   |
| Chi-VellInd   | 3 | 21138.7   | XXXX   |
| Mom-PII24Ind  | 3 | 24115.3   | XXXX   |
| Can-PearlJa   | 3 | 30605.3   | XXXX   |
| Dud-QPMAfg    | 3 | 41068.3   | XXXX   |
| Can-EfJa      | 3 | 41223.7   | XXXX   |
| La-ErizoSp    | 3 | 58548.0   | XXXXXX |
| Can-GCHUSA    | 3 | 69081.7   | XXXXXX |
| Dud-QAPMGeorg | 3 | 90405.3   | XXXXXX |
| Mom-MR1Ind    | 3 | 162161.   | XXXXXX |
| Can-TopUSA    | 3 | 166404.   | XXXX   |
| Can-DulUSA    | 3 | 172512.   | XXX    |
| Am-NesviGeor  | 3 | 200229.   | XXX    |
| Can-Ogen2Is   | 3 | 274954.   | XXX    |
| Can-HBJUSA    | 3 | 334261.   | XX     |
| In-BBredSp    | 3 | 353494.   | XX     |
| Can-SemUSA    | 2 | 361448.   | XX     |
| Can-PGRFran   | 3 | 386005.   | X      |
| Am-AnaFran    | 3 | 404726.   | X      |
| Mom-KhaInd    | 3 | 430828.   | X      |
| Am-YokIs      | 2 | 1.45383E6 | X      |

#### LSD analysis for S.7 per accessions

Method: 95.0 percentage LSD

| <i>accessions</i> | <i>Cases</i> | <i>Mean</i> | <i>Homogeneous groups</i> |
|-------------------|--------------|-------------|---------------------------|
| Flex-SnakeSA      | 3            | 750.0       | X                         |
| La-Zatlta         | 3            | 750.0       | X                         |
| Can-SucrFran      | 3            | 750.0       | X                         |
| La-KroFran        | 4            | 750.0       | X                         |
| Con-MielChi       | 3            | 750.0       | X                         |
| Con-GMJJa         | 3            | 750.0       | X                         |
| Am-KafEgy         | 2            | 750.0       | XX                        |
| In-AmAoroSp       | 2            | 750.0       | XX                        |
| In-LaEscrSp       | 2            | 750.0       | XX                        |
| In-RoMoch1Sp      | 3            | 750.0       | X                         |
| Tibish-Ksud       | 3            | 750.0       | X                         |
| Con-ShiroJa       | 3            | 750.0       | X                         |
| In-CGBUSA         | 3            | 750.0       | X                         |
| chate-CarIta      | 1            | 750.0       | XXXX                      |
| In-LaBolasSp      | 3            | 750.0       | X                         |
| In-HoneyDewUSA    | 3            | 750.0       | X                         |
| In-TeSp           | 3            | 750.0       | X                         |
| In-CrabPor        | 2            | 750.0       | XX                        |
| Ac-SRKSLan        | 3            | 750.0       | X                         |
| Ag-TendSud        | 3            | 750.0       | X                         |
| Con-PauPol        | 3            | 750.0       | X                         |
| Con-SCKo          | 3            | 750.0       | X                         |
| In-AmCañSp        | 3            | 750.0       | X                         |
| Am-HassanTur      | 3            | 750.0       | X                         |
| Ag-WChInd         | 3            | 750.0       | X                         |

|                |   |           |        |
|----------------|---|-----------|--------|
| Ac-TGR1551Zimb | 3 | 750.0     | X      |
| Ac-SVInd       | 2 | 750.0     | XX     |
| In-PsPiñSp     | 3 | 750.0     | X      |
| Con-FreeCJa    | 3 | 750.0     | X      |
| Con-BaishChi   | 3 | 763.0     | X      |
| Am-KizilUzbe   | 3 | 772.667   | X      |
| Ag-15591Gha    | 3 | 776.667   | X      |
| Flex-AryaInd   | 3 | 808.333   | X      |
| La-CascaPor    | 2 | 848.0     | XX     |
| Ag-CallInd     | 3 | 897.0     | X      |
| In-TeNinvSp    | 2 | 938.0     | XX     |
| Can-NOFran     | 2 | 1249.0    | XX     |
| Flex-Co20Ind   | 3 | 1686.0    | X      |
| Con-NanChi     | 3 | 1888.33   | X      |
| Am-korcaRus    | 3 | 3939.67   | X      |
| In-BBescrSp    | 3 | 3992.67   | X      |
| Ac-G22843Se    | 3 | 4233.67   | X      |
| In-TDewUSA     | 3 | 4972.0    | X      |
| Can-EanaHun    | 3 | 5010.33   | X      |
| In-TeNinvSp2   | 2 | 5093.5    | XX     |
| Can-NCFran     | 2 | 6654.5    | XX     |
| Can-GyFran     | 2 | 7023.0    | XX     |
| In-ComunSp     | 2 | 7220.5    | XX     |
| Can-WiUSA      | 3 | 7327.33   | X      |
| Am-TokTaj      | 3 | 7450.67   | X      |
| Can-VedFran    | 3 | 11874.0   | X      |
| Mom-PI124Ind   | 3 | 23137.3   | XX     |
| Chi-VellInd    | 3 | 40030.7   | XXX    |
| Dud-QPMAfg     | 3 | 40952.0   | XXX    |
| La-OgenBul     | 3 | 41918.0   | XXX    |
| Can-PearlJa    | 3 | 49312.0   | XXX    |
| Can-EfJa       | 3 | 56356.7   | XXX    |
| Can-GCHUSA     | 3 | 72189.0   | XXXX   |
| Can-TopUSA     | 3 | 95942.3   | XXXX   |
| Can-DulUSA     | 3 | 96545.0   | XXXX   |
| Dud-QAPMGeorg  | 3 | 97167.0   | XXXX   |
| La-ErizoSp     | 3 | 166869.   | XXXXXX |
| Am-NesviGeor   | 3 | 196484.   | XXXX   |
| Mom-MR1Ind     | 3 | 214715.   | XXXX   |
| Can-PGRFran    | 3 | 243569.   | XXX    |
| Am-AnaFran     | 3 | 285242.   | XXX    |
| Can-Ogen2Is    | 3 | 295656.   | XXX    |
| Mom-KhaInd     | 3 | 381485.   | XXX    |
| Can-SemUSA     | 2 | 475124.   | XXX    |
| Can-HBJUSA     | 3 | 523455.   | XX     |
| In-BBredSp     | 3 | 630110.   | X      |
| Am-YokIs       | 2 | 1.58169E6 | X      |

#### LSD analysis for S.8 per accessions

Method: 95.0 percentage LSD

| <i>accessions</i> | <i>Cases</i> | <i>Mean</i> | <i>Homogeneous groups</i> |
|-------------------|--------------|-------------|---------------------------|
| Con-NanChi        | 3            | 750.0       | X                         |
| Tibish-Ksud       | 3            | 750.0       | X                         |
| Con-SCKo          | 3            | 750.0       | X                         |
| Am-HassanTur      | 3            | 750.0       | X                         |
| Con-ShiroJa       | 3            | 750.0       | X                         |

|                |   |         |      |
|----------------|---|---------|------|
| Flex-Co20Ind   | 3 | 750.0   | X    |
| Am-KafEgy      | 2 | 750.0   | XXX  |
| In-RoMoch1Sp   | 3 | 750.0   | X    |
| In-TDewUSA     | 3 | 750.0   | X    |
| In-AmCañSp     | 3 | 750.0   | X    |
| Flex-SnakeSA   | 3 | 750.0   | X    |
| In-HoneyDewUSA | 3 | 750.0   | X    |
| In-AmAoroSp    | 2 | 750.0   | XXX  |
| In-BBescrSp    | 3 | 750.0   | X    |
| Ac-TGR1551Zimb | 3 | 750.0   | X    |
| In-ComunSp     | 2 | 750.0   | XXX  |
| Can-EanaHun    | 3 | 750.0   | X    |
| Ac-SRKSLan     | 3 | 750.0   | X    |
| Can-WiUSA      | 3 | 750.0   | X    |
| In-LaEscrSp    | 2 | 750.0   | XXX  |
| Con-FreeCJa    | 3 | 750.0   | X    |
| Can-NCFran     | 2 | 750.0   | XXX  |
| Ac-G22843Se    | 3 | 750.0   | X    |
| In-CGBUSA      | 3 | 750.0   | X    |
| chate-Carlta   | 1 | 750.0   | XXXX |
| La-KroFran     | 4 | 750.0   | X    |
| Ac-SV1Ind      | 2 | 750.0   | XXX  |
| Can-SucrFran   | 3 | 750.0   | X    |
| In-TeSp        | 3 | 750.0   | X    |
| Ag-TendSud     | 3 | 750.0   | X    |
| Ag-WChInd      | 3 | 750.0   | X    |
| In-PsPiñSp     | 3 | 750.0   | X    |
| In-CrabPor     | 2 | 750.0   | XXX  |
| In-TeNinvSp2   | 2 | 750.0   | XXX  |
| Con-GMJJa      | 3 | 750.0   | X    |
| Con-MielChi    | 3 | 750.0   | X    |
| Con-BaishChi   | 3 | 763.0   | X    |
| Am-KizilUzbe   | 3 | 772.667 | X    |
| Ag-15591Gha    | 3 | 776.667 | X    |
| Am-TokTaj      | 3 | 781.667 | X    |
| Flex-AryaInd   | 3 | 808.333 | X    |
| Mom-PII24Ind   | 3 | 815.333 | X    |
| La-CascaPor    | 2 | 848.0   | XXX  |
| Ag-CallInd     | 3 | 897.0   | X    |
| Can-VedFran    | 3 | 929.333 | X    |
| In-TeNinvSp    | 2 | 938.0   | XXX  |
| Dud-QPMAfg     | 3 | 943.333 | X    |
| Chi-VellInd    | 3 | 1082.33 | X    |
| La-OgenBul     | 3 | 1194.0  | X    |
| Can-NOFran     | 2 | 1249.0  | XXX  |
| La-ErizoSp     | 3 | 1295.33 | X    |
| Can-DulUSA     | 3 | 1485.67 | X    |
| Can-PearlJa    | 3 | 1507.33 | X    |
| Can-EfJa       | 3 | 1665.0  | XX   |
| Can-TopUSA     | 3 | 2289.33 | XXX  |
| La-Zatlta      | 3 | 2479.33 | XXX  |
| Can-GCHUSA     | 3 | 3539.33 | XXX  |
| Con-PauPol     | 3 | 4677.33 | XXX  |
| Can-SemUSA     | 2 | 5502.5  | XXXX |
| Can-GyFran     | 2 | 7023.0  | XXXX |
| In-LaBolasSp   | 3 | 10586.7 | XXXX |
| Can-HBJUSA     | 3 | 10911.7 | XXXX |

|               |   |         |      |
|---------------|---|---------|------|
| Am-korcaRus   | 3 | 13216.7 | XXXX |
| Am-NesviGeor  | 3 | 13512.7 | XXXX |
| Am-AnaFran    | 3 | 16625.3 | XXXX |
| Can-PGRFran   | 3 | 18216.3 | XXXX |
| Dud-QAPMGeorg | 3 | 27179.7 | XXXX |
| Can-Ogen2Is   | 3 | 27257.3 | XXX  |
| Mom-KhaInd    | 3 | 33045.3 | XX   |
| Mom-MR1Ind    | 3 | 45232.3 | XX   |
| In-BBredSp    | 3 | 63474.7 | XX   |
| Am-YokIs      | 2 | 74843.5 | X    |

#### LSD analysis for S.9 per accessions

Method: 95.0 percentage LSD

| <i>accessions</i> | <i>Cases</i> | <i>Mean</i> | <i>Homogeneous groups</i> |
|-------------------|--------------|-------------|---------------------------|
| Am-KiziUzbe       | 3            | 750.0       | X                         |
| In-CrabPor        | 2            | 750.0       | X                         |
| In-ComunSp        | 2            | 750.0       | X                         |
| In-CGBUSA         | 3            | 750.0       | X                         |
| In-TeNinvSp       | 2            | 750.0       | X                         |
| In-LaBolasSp      | 3            | 750.0       | X                         |
| In-HoneyDewUSA    | 3            | 750.0       | X                         |
| In-LaEscrSp       | 2            | 750.0       | X                         |
| In-TDewUSA        | 3            | 750.0       | X                         |
| Ag-15591Gha       | 3            | 750.0       | X                         |
| Ac-G22843Se       | 3            | 750.0       | X                         |
| La-ZatIta         | 3            | 750.0       | X                         |
| Ac-SVIIInd        | 2            | 750.0       | X                         |
| La-KroFran        | 4            | 750.0       | X                         |
| In-PsPiñSp        | 3            | 750.0       | X                         |
| Mom-PII24Ind      | 3            | 750.0       | X                         |
| In-TeSp           | 3            | 750.0       | X                         |
| Tibish-Ksud       | 3            | 750.0       | X                         |
| Ac-SRKSLan        | 3            | 750.0       | X                         |
| In-TeNinvSp2      | 2            | 750.0       | X                         |
| Am-KafEgy         | 2            | 750.0       | X                         |
| Can-NCFran        | 2            | 750.0       | X                         |
| Can-NOFran        | 2            | 750.0       | X                         |
| Ag-CallInd        | 3            | 750.0       | X                         |
| chate-CarIta      | 1            | 750.0       | XXX                       |
| Con-BaishChi      | 3            | 750.0       | X                         |
| Am-TokTaj         | 3            | 750.0       | X                         |
| Can-SucrFran      | 3            | 750.0       | X                         |
| Ag-TendSud        | 3            | 750.0       | X                         |
| Ag-WChInd         | 3            | 750.0       | X                         |
| In-RoMoch1Sp      | 3            | 750.0       | X                         |
| La-CascaPor       | 2            | 750.0       | X                         |
| Ac-TGR1551Zimb    | 3            | 750.0       | X                         |
| Con-FreeCJa       | 3            | 750.0       | X                         |
| Con-GMJJa         | 3            | 750.0       | X                         |
| Con-MielChi       | 3            | 750.0       | X                         |
| Con-NanChi        | 3            | 750.0       | X                         |
| Con-PauPol        | 3            | 750.0       | X                         |
| Con-SCKo          | 3            | 750.0       | X                         |
| Con-ShiroJa       | 3            | 750.0       | X                         |
| Can-GyFran        | 2            | 750.0       | X                         |
| Am-HassanTur      | 3            | 750.0       | X                         |

|               |   |         |          |
|---------------|---|---------|----------|
| Flex-AryaInd  | 3 | 750.0   | X        |
| Flex-Co20Ind  | 3 | 750.0   | X        |
| Flex-SnakeSA  | 3 | 750.0   | X        |
| In-AmAoroSp   | 2 | 750.0   | X        |
| In-AmCañSp    | 3 | 750.0   | X        |
| In-BBescrSp   | 3 | 750.0   | X        |
| Am-korcaRus   | 3 | 1330.33 | X        |
| Can-WiUSA     | 3 | 1714.0  | X        |
| Can-EanaHun   | 3 | 1953.33 | X        |
| Can-VedFran   | 3 | 2451.0  | X        |
| La-OgenBul    | 3 | 4217.67 | X        |
| Can-PearlJa   | 3 | 5054.33 | X        |
| Chi-VellInd   | 3 | 5857.0  | X        |
| Can-EfJa      | 3 | 7524.67 | XX       |
| Dud-QPMAfg    | 3 | 8725.0  | XX       |
| Can-GCHUSA    | 3 | 12297.3 | XX       |
| Can-TopUSA    | 3 | 18308.0 | XXX      |
| La-ErizoSp    | 3 | 19431.7 | XXXX     |
| Can-DulUSA    | 3 | 19464.7 | XXXX     |
| Dud-QAPMGeorg | 3 | 21107.3 | XXXXXX   |
| Mom-MR1Ind    | 3 | 35451.3 | XXXXXXXX |
| Am-NesviGeor  | 3 | 49143.7 | XXXXXX   |
| Am-AnaFran    | 3 | 57143.0 | XXXX     |
| Can-PGRFran   | 3 | 60868.7 | XXX      |
| Can-SemUSA    | 2 | 67453.5 | XX       |
| Can-Ogen2Is   | 3 | 70429.0 | X        |
| Mom-KhaInd    | 3 | 72428.7 | X        |
| Can-HBJUSA    | 3 | 77261.3 | XX       |
| In-BBredSp    | 3 | 115909. | X        |
| Am-YokIs      | 2 | 322589. | X        |

#### LSD analysis for S.10 per accessions

Method: 95.0 percentage LSD

| <i>accessions</i> | <i>Cases</i> | <i>Mean</i> | <i>Homogeneous groups</i> |
|-------------------|--------------|-------------|---------------------------|
| In-PsPiñSp        | 3            | 750.0       | X                         |
| Ag-CallInd        | 3            | 750.0       | X                         |
| Con-NanChi        | 3            | 750.0       | X                         |
| Tibish-Ksud       | 3            | 750.0       | X                         |
| Can-SucrFran      | 3            | 750.0       | X                         |
| Con-ShiroJa       | 3            | 750.0       | X                         |
| Con-SCKo          | 3            | 750.0       | X                         |
| In-CrabPor        | 2            | 750.0       | X                         |
| Con-PauPol        | 3            | 750.0       | X                         |
| La-ZatIta         | 3            | 750.0       | X                         |
| Am-HassanTur      | 3            | 750.0       | X                         |
| Con-BaishChi      | 3            | 750.0       | X                         |
| Ag-TendSud        | 3            | 750.0       | X                         |
| Flex-SnakeSA      | 3            | 750.0       | X                         |
| In-HoneyDewUSA    | 3            | 750.0       | X                         |
| Ac-SV1Ind         | 2            | 750.0       | X                         |
| chate-CarIta      | 1            | 750.0       | XXX                       |
| Con-FreeCJa       | 3            | 750.0       | X                         |
| Ac-SRKSLan        | 3            | 750.0       | X                         |
| In-CGBUSA         | 3            | 750.0       | X                         |
| Ac-TGR1551Zimb    | 3            | 750.0       | X                         |
| Con-MielChi       | 3            | 750.0       | X                         |

|               |   |           |        |
|---------------|---|-----------|--------|
| In-AmCañSp    | 3 | 750.0     | X      |
| In-RoMoch1Sp  | 3 | 750.0     | X      |
| Ag-WChInd     | 3 | 750.0     | X      |
| Con-GMJJa     | 3 | 750.0     | X      |
| In-AmAoroSp   | 2 | 750.0     | X      |
| Flex-AryaInd  | 3 | 2044.33   | X      |
| Ag-15591Gha   | 3 | 2111.0    | X      |
| In-TeSp       | 3 | 2301.67   | X      |
| In-LaBolasSp  | 3 | 2825.0    | X      |
| Flex-Co20Ind  | 3 | 3767.33   | X      |
| Can-GyFran    | 2 | 4098.5    | X      |
| Am-KizilUzbe  | 3 | 4352.33   | X      |
| In-LaEscrSp   | 2 | 5072.5    | X      |
| La-KroFran    | 4 | 6368.25   | X      |
| Am-KafEgy     | 2 | 7693.5    | X      |
| Can-NOFran    | 2 | 8021.5    | X      |
| In-TeNinvSp   | 2 | 10020.0   | XX     |
| La-CascaPor   | 2 | 10422.0   | XX     |
| In-BBescrSp   | 3 | 11558.3   | X      |
| Ac-G22843Se   | 3 | 11856.3   | X      |
| In-TDewUSA    | 3 | 15399.0   | X      |
| Can-EanaHun   | 3 | 18018.7   | X      |
| In-TeNinvSp2  | 2 | 18324.5   | XX     |
| In-ComunSp    | 2 | 20423.5   | XX     |
| Am-korcaRus   | 3 | 23014.0   | X      |
| Can-NCFran    | 2 | 26774.5   | XX     |
| Am-TokTaj     | 3 | 28730.0   | X      |
| Can-WiUSA     | 3 | 45200.0   | X      |
| Can-VedFran   | 3 | 47567.0   | X      |
| Mom-PII24Ind  | 3 | 71800.0   | XX     |
| La-OgenBul    | 3 | 96588.3   | XXX    |
| Chi-VellInd   | 3 | 115050.   | XXX    |
| Dud-QPMAfg    | 3 | 126891.   | XXX    |
| Can-PearlJa   | 3 | 145394.   | XXX    |
| Can-EfJa      | 3 | 166293.   | XXX    |
| Can-GCHUSA    | 3 | 246424.   | XXX    |
| Dud-QAPMGeorg | 3 | 294076.   | XXX    |
| Can-DulUSA    | 3 | 400105.   | XXXX   |
| Can-TopUSA    | 3 | 435619.   | XXXX   |
| La-ErizoSp    | 3 | 443725.   | XXXXXX |
| Am-NesviGeor  | 3 | 550359.   | XXXX   |
| Mom-MR1Ind    | 3 | 572356.   | XXX    |
| Can-PGRFran   | 3 | 823953.   | XXX    |
| Can-Ogen2Is   | 3 | 883194.   | XXX    |
| Am-AnaFran    | 3 | 921785.   | XX     |
| Mom-KhaInd    | 3 | 1.09005E6 | XX     |
| Can-HBJUSA    | 3 | 1.50114E6 | XX     |
| Can-SemUSA    | 2 | 1.52075E6 | XX     |
| In-BBredSp    | 3 | 1.73675E6 | X      |
| Am-YokIs      | 2 | 3.71137E6 | X      |

#### LSD analysis for S.11 per accessions

Method: 95.0 percentage LSD

| <i>accessions</i> | <i>Cases</i> | <i>Mean</i> | <i>Homogeneous groups</i> |
|-------------------|--------------|-------------|---------------------------|
| Con-GMJJa         | 3            | 750.0       | X                         |
| Tibish-Ksud       | 3            | 750.0       | X                         |



|                |   |         |     |
|----------------|---|---------|-----|
| In-AmCañSp     | 3 | 750.0   | X   |
| Con-NanChi     | 3 | 750.0   | X   |
| La-ZatIta      | 3 | 750.0   | X   |
| Con-SCKo       | 3 | 750.0   | X   |
| Con-FreeCJa    | 3 | 750.0   | X   |
| Am-KizilUzbe   | 3 | 750.0   | X   |
| Con-PauPol     | 3 | 750.0   | X   |
| Am-HassanTur   | 3 | 750.0   | X   |
| Con-MielChi    | 3 | 750.0   | X   |
| chate-CarIta   | 1 | 750.0   | XXX |
| Am-KafEgy      | 2 | 750.0   | XX  |
| Con-ShiroJa    | 3 | 750.0   | X   |
| In-HoneyDewUSA | 3 | 750.0   | X   |
| In-PsPiñSp     | 3 | 750.0   | X   |
| La-CascaPor    | 2 | 750.0   | XX  |
| Ac-TGR1551Zimb | 3 | 750.0   | X   |
| Ac-SRKSLan     | 3 | 750.0   | X   |
| In-CrabPor     | 2 | 750.0   | XX  |
| Flex-SnakeSA   | 3 | 750.0   | X   |
| Ag-15591Gha    | 3 | 750.0   | X   |
| In-RoMoch1Sp   | 3 | 750.0   | X   |
| Ag-TendSud     | 3 | 750.0   | X   |
| Con-BaishChi   | 3 | 750.0   | X   |
| Ag-WChInd      | 3 | 750.0   | X   |
| Ac-SVIIInd     | 2 | 750.0   | XX  |
| In-CGBUSA      | 3 | 750.0   | X   |
| In-LaEscrSp    | 2 | 750.0   | XX  |
| In-AmAoroSp    | 2 | 750.0   | XX  |
| Can-SucrFran   | 3 | 750.0   | X   |
| In-LaBolasSp   | 3 | 750.0   | X   |
| Ag-CallInd     | 3 | 783.0   | X   |
| Can-NOFran     | 2 | 801.5   | XX  |
| Can-GyFran     | 2 | 834.5   | XX  |
| In-TeSp        | 3 | 1193.0  | X   |
| Flex-AryaInd   | 3 | 1233.33 | X   |
| Flex-Co20Ind   | 3 | 1959.33 | X   |
| La-KroFran     | 4 | 2917.25 | X   |
| Ac-G22843Se    | 3 | 3520.33 | X   |
| In-BBescrSp    | 3 | 4629.0  | X   |
| In-TeNinvSp    | 2 | 5414.5  | XX  |
| In-TeNinvSp2   | 2 | 5577.0  | XX  |
| In-TDewUSA     | 3 | 6198.33 | XX  |
| Can-EanaHun    | 3 | 6978.33 | XX  |
| In-ComunSp     | 2 | 8720.0  | XX  |
| Am-korcaRus    | 3 | 8847.0  | XX  |
| Can-WiUSA      | 3 | 9202.0  | XX  |
| Can-VedFran    | 3 | 9718.67 | XX  |
| Am-TokTaj      | 3 | 10020.0 | XX  |
| Can-NCFran     | 2 | 12757.5 | XXX |
| Mom-PII24Ind   | 3 | 18857.7 | XX  |
| La-OgenBul     | 3 | 35828.7 | XXX |
| Chi-VellInd    | 3 | 36065.7 | XXX |
| Can-PearlJa    | 3 | 38497.0 | XXX |
| Dud-QPMAfg     | 3 | 44904.3 | XXX |
| Can-EfJa       | 3 | 60928.7 | XXX |
| Can-GCHUSA     | 3 | 98219.3 | XXX |
| Dud-QAPMGeorg  | 3 | 117824. | XXX |

|              |   |           |      |
|--------------|---|-----------|------|
| La-ErizoSp   | 3 | 138380.   | XXXX |
| Can-TopUSA   | 3 | 150348.   | XXXX |
| Can-DulUSA   | 3 | 159311.   | XXXX |
| Mom-MRIInd   | 3 | 183833.   | XXX  |
| Am-NesviGeor | 3 | 209549.   | XXX  |
| Mom-KhaInd   | 3 | 297169.   | XXX  |
| Am-AnaFran   | 3 | 375370.   | XXX  |
| Can-PGRFran  | 3 | 408179.   | XXX  |
| Can-Ogen2Is  | 3 | 434754.   | XXXX |
| Can-SemUSA   | 2 | 501760.   | XXX  |
| Can-HBJUSA   | 3 | 568201.   | XX   |
| In-BBredSp   | 3 | 592547.   | X    |
| Am-YokIs     | 2 | 1.23013E6 | X    |

### LSD analysis for S.12 per accessions

Method: 95.0 percentage LSD

| <i>accessions</i> | <i>Cases</i> | <i>Mean</i> | <i>Homogeneous groups</i> |
|-------------------|--------------|-------------|---------------------------|
| In-PsPiñSp        | 3            | 750.0       | X                         |
| Ac-SRKSLan        | 3            | 750.0       | X                         |
| Am-HassanTur      | 3            | 750.0       | X                         |
| Ac-TGR1551Zimb    | 3            | 750.0       | X                         |
| Can-SucrFran      | 3            | 750.0       | X                         |
| Con-MielChi       | 3            | 750.0       | X                         |
| Can-NCFran        | 2            | 750.0       | X                         |
| Am-KafEgy         | 2            | 750.0       | X                         |
| Con-GMJJa         | 3            | 750.0       | X                         |
| Con-SCKo          | 3            | 750.0       | X                         |
| La-CascaPor       | 2            | 750.0       | X                         |
| Ag-TendSud        | 3            | 750.0       | X                         |
| Ag-CallInd        | 3            | 750.0       | X                         |
| In-LaEscrSp       | 2            | 750.0       | X                         |
| In-AmCañSp        | 3            | 750.0       | X                         |
| In-LaBolasSp      | 3            | 750.0       | X                         |
| Tibish-Ksud       | 3            | 750.0       | X                         |
| In-CrabPor        | 2            | 750.0       | X                         |
| In-HoneyDewUSA    | 3            | 750.0       | X                         |
| In-TeNinvSp2      | 2            | 750.0       | X                         |
| Con-ShiroJa       | 3            | 750.0       | X                         |
| Flex-SnakeSA      | 3            | 750.0       | X                         |
| In-RoMoch1Sp      | 3            | 750.0       | X                         |
| Ac-G22843Se       | 3            | 750.0       | X                         |
| Con-BaishChi      | 3            | 750.0       | X                         |
| Con-FreeCJa       | 3            | 750.0       | X                         |
| Am-TokTaj         | 3            | 750.0       | X                         |
| Ac-SVIIInd        | 2            | 750.0       | X                         |
| chate-CarIta      | 1            | 750.0       | XX                        |
| Ag-WChInd         | 3            | 750.0       | X                         |
| La-ZatIta         | 3            | 750.0       | X                         |
| Ag-15591Gha       | 3            | 810.667     | X                         |
| Can-VedFran       | 3            | 812.333     | X                         |
| Flex-AryaInd      | 3            | 819.0       | X                         |
| In-AmAoroSp       | 2            | 957.5       | X                         |
| In-TeNinvSp       | 2            | 967.5       | X                         |
| Am-KizilUzbe      | 3            | 982.333     | X                         |
| In-TeSp           | 3            | 1050.0      | X                         |

|               |   |         |    |
|---------------|---|---------|----|
| Flex-Co20Ind  | 3 | 1059.67 | X  |
| Con-NanChi    | 3 | 1076.0  | X  |
| In-CGBUSA     | 3 | 1090.0  | X  |
| Chi-VellInd   | 3 | 1311.67 | X  |
| In-TDewUSA    | 3 | 1382.0  | X  |
| La-KroFran    | 4 | 1432.0  | X  |
| Can-DulUSA    | 3 | 1608.33 | X  |
| Am-korcaRus   | 3 | 1635.33 | X  |
| Con-PauPol    | 3 | 1713.33 | X  |
| Can-TopUSA    | 3 | 1736.33 | X  |
| Am-AnaFran    | 3 | 1832.67 | X  |
| Can-NOFran    | 2 | 2266.0  | X  |
| In-BBescrSp   | 3 | 2354.0  | X  |
| Can-GyFran    | 2 | 2439.5  | X  |
| Can-WiUSA     | 3 | 2488.0  | X  |
| In-ComunSp    | 2 | 2753.0  | X  |
| Can-EanaHun   | 3 | 2909.33 | X  |
| Mom-PII24Ind  | 3 | 2998.0  | X  |
| Can-PearlJa   | 3 | 3570.67 | X  |
| Can-HBJUSA    | 3 | 3814.0  | X  |
| Can-SemUSA    | 2 | 4259.5  | X  |
| Can-EfJa      | 3 | 4423.67 | X  |
| Dud-QPMAfg    | 3 | 5306.67 | X  |
| La-OgenBul    | 3 | 6323.67 | X  |
| Can-GCHUSA    | 3 | 8045.0  | X  |
| La-ErizoSp    | 3 | 23926.3 | XX |
| Dud-QAPMGeorg | 3 | 25280.0 | XX |
| Can-PGRFran   | 3 | 25994.0 | XX |
| Can-Ogen2Is   | 3 | 27082.0 | XX |
| Mom-MR1Ind    | 3 | 30957.0 | XX |
| Am-NesviGeor  | 3 | 43413.3 | XX |
| Mom-KhaInd    | 3 | 75978.3 | XX |
| In-BBredSp    | 3 | 105027. | XX |
| Am-YokIs      | 2 | 116845. | X  |

#### LSD analysis for S.13 per accessions

Method: 95.0 percentage LSD

| <i>accessions</i> | <i>Cases</i> | <i>Mean</i> | <i>Homogeneous groups</i> |
|-------------------|--------------|-------------|---------------------------|
| In-CGBUSA         | 3            | 750.0       | X                         |
| In-ComunSp        | 2            | 750.0       | XXX                       |
| In-HoneyDewUSA    | 3            | 750.0       | X                         |
| In-CrabPor        | 2            | 750.0       | XXX                       |
| In-PsPiñSp        | 3            | 750.0       | X                         |
| Tibish-Ksud       | 3            | 750.0       | X                         |
| In-LaEscrSp       | 2            | 750.0       | XXX                       |
| In-RoMoch1Sp      | 3            | 750.0       | X                         |
| In-TeNinvSp       | 2            | 750.0       | XXX                       |
| In-LaBolasSp      | 3            | 750.0       | X                         |
| Ac-G22843Se       | 3            | 750.0       | X                         |
| La-ZatIta         | 3            | 750.0       | X                         |
| Ac-SVIInd         | 2            | 750.0       | XXX                       |
| chate-CarIta      | 1            | 750.0       | XXX                       |
| In-TDewUSA        | 3            | 750.0       | X                         |
| La-KroFran        | 4            | 750.0       | X                         |
| In-TeSp           | 3            | 750.0       | X                         |
| Con-BaishChi      | 3            | 750.0       | X                         |

|                |   |         |        |
|----------------|---|---------|--------|
| Ac-SRKSLan     | 3 | 750.0   | X      |
| In-TeNinvSp2   | 2 | 750.0   | XXX    |
| Am-KafEgy      | 2 | 750.0   | XXX    |
| Can-NCFran     | 2 | 750.0   | XXX    |
| Can-NOFran     | 2 | 750.0   | XXX    |
| Ag-CallInd     | 3 | 750.0   | X      |
| Mom-PII24Ind   | 3 | 750.0   | X      |
| Ag-WChInd      | 3 | 750.0   | X      |
| Am-TokTaj      | 3 | 750.0   | X      |
| Can-SucrFran   | 3 | 750.0   | X      |
| Ag-TendSud     | 3 | 750.0   | X      |
| Can-VedFran    | 3 | 750.0   | X      |
| Am-korcaRus    | 3 | 750.0   | X      |
| Can-WiUSA      | 3 | 750.0   | X      |
| Ac-TGR1551Zimb | 3 | 750.0   | X      |
| Con-FreeCJa    | 3 | 750.0   | X      |
| Con-GMJJa      | 3 | 750.0   | X      |
| Con-MielChi    | 3 | 750.0   | X      |
| Con-NanChi     | 3 | 750.0   | X      |
| Con-PauPol     | 3 | 750.0   | X      |
| Con-SCKo       | 3 | 750.0   | X      |
| Con-ShiroJa    | 3 | 750.0   | X      |
| La-CascaPor    | 2 | 750.0   | XXX    |
| Am-HassanTur   | 3 | 750.0   | X      |
| Flex-AryaInd   | 3 | 750.0   | X      |
| Flex-Co20Ind   | 3 | 750.0   | X      |
| Flex-SnakeSA   | 3 | 750.0   | X      |
| In-AmAoroSp    | 2 | 750.0   | XXX    |
| In-AmCañSp     | 3 | 750.0   | X      |
| In-BBescrSp    | 3 | 750.0   | X      |
| Am-KizilUzbe   | 3 | 750.0   | X      |
| Ag-15591Gha    | 3 | 805.0   | X      |
| Can-PearlJa    | 3 | 883.333 | X      |
| Chi-VellInd    | 3 | 973.667 | XX     |
| Can-GyFran     | 2 | 1495.0  | XXX    |
| Can-EanaHun    | 3 | 1609.33 | XX     |
| La-OgenBul     | 3 | 4073.0  | XXX    |
| Can-TopUSA     | 3 | 4154.67 | XXX    |
| Can-EfJa       | 3 | 4523.33 | XXX    |
| Dud-QPMAfg     | 3 | 5489.33 | XXX    |
| Can-GCHUSA     | 3 | 7631.0  | XXX    |
| Can-DulUSA     | 3 | 11691.7 | XXX    |
| Dud-QAPMGeorg  | 3 | 16182.0 | XXX    |
| La-ErizoSp     | 3 | 17306.7 | XXX    |
| Am-AnaFran     | 3 | 24455.3 | XXXX   |
| Mom-MR1Ind     | 3 | 27864.7 | XXXX   |
| Can-PGRFran    | 3 | 35761.7 | XXXXXX |
| Am-NesviGeor   | 3 | 39245.3 | XXXX   |
| Mom-KhaInd     | 3 | 39927.0 | XXX    |
| Can-Ogen2Is    | 3 | 56624.7 | XXX    |
| Can-SemUSA     | 2 | 64260.0 | XXX    |
| Can-HBJUSA     | 3 | 68228.3 | XX     |
| In-BBredSp     | 3 | 94407.3 | X      |
| Am-YokIs       | 2 | 286469. | X      |

LSD analysis for S.14 per accessions

Method: 95.0 percentage LSD

| <i>accessions</i> | <i>Cases</i> | <i>Mean</i> | <i>Homogeneous groups</i> |
|-------------------|--------------|-------------|---------------------------|
| Con-MielChi       | 3            | 750.0       | X                         |
| Con-ShiroJa       | 3            | 750.0       | X                         |
| Con-NanChi        | 3            | 750.0       | X                         |
| Con-SCKo          | 3            | 750.0       | X                         |
| Am-HassanTur      | 3            | 750.0       | X                         |
| chate-CarIta      | 1            | 750.0       | XXX                       |
| Con-PauPol        | 3            | 750.0       | X                         |
| In-LaBolasSp      | 3            | 750.0       | X                         |
| In-RoMoch1Sp      | 3            | 750.0       | X                         |
| Flex-SnakeSA      | 3            | 750.0       | X                         |
| Flex-Co20Ind      | 3            | 750.0       | X                         |
| In-TeSp           | 3            | 750.0       | X                         |
| Ac-SV1Ind         | 2            | 750.0       | XX                        |
| Am-KafEgy         | 2            | 750.0       | XX                        |
| In-BBescrSp       | 3            | 750.0       | X                         |
| In-AmAoroSp       | 2            | 750.0       | XX                        |
| Ag-TendSud        | 3            | 750.0       | X                         |
| Ac-TGR1551Zimb    | 3            | 750.0       | X                         |
| Ac-SRKSLan        | 3            | 750.0       | X                         |
| In-TeNinvSp2      | 2            | 750.0       | XX                        |
| In-HoneyDewUSA    | 3            | 750.0       | X                         |
| In-CrabPor        | 2            | 750.0       | XX                        |
| In-CGBUSA         | 3            | 750.0       | X                         |
| In-AmCañSp        | 3            | 750.0       | X                         |
| Tibish-Ksud       | 3            | 750.0       | X                         |
| Ag-WChInd         | 3            | 750.0       | X                         |
| Am-TokTaj         | 3            | 750.0       | X                         |
| Can-SucrFran      | 3            | 750.0       | X                         |
| La-KroFran        | 4            | 750.0       | X                         |
| In-LaEscrSp       | 2            | 750.0       | XX                        |
| In-TDewUSA        | 3            | 750.0       | X                         |
| In-PsPiñSp        | 3            | 750.0       | X                         |
| Con-FreeCJa       | 3            | 750.0       | X                         |
| La-ZatIta         | 3            | 750.0       | X                         |
| Con-GMJJa         | 3            | 750.0       | X                         |
| Con-BaishChi      | 3            | 763.0       | X                         |
| Am-KizilUzbe      | 3            | 772.667     | X                         |
| Ag-15591Gha       | 3            | 776.667     | X                         |
| Flex-AryaInd      | 3            | 808.333     | X                         |
| La-CascaPor       | 2            | 847.0       | XX                        |
| Ag-CallInd        | 3            | 897.0       | X                         |
| In-TeNinvSp       | 2            | 948.0       | XX                        |
| Can-NOFran        | 2            | 1249.0      | XX                        |
| Ac-G22843Se       | 3            | 2167.67     | X                         |
| Am-korcaRus       | 3            | 2212.0      | X                         |
| Mom-PII24Ind      | 3            | 3610.33     | X                         |
| In-ComunSp        | 2            | 4288.5      | XX                        |
| Can-WiUSA         | 3            | 4598.33     | X                         |
| Can-EanaHun       | 3            | 4601.67     | X                         |
| Can-VedFran       | 3            | 4609.33     | X                         |
| Can-NCFran        | 2            | 6887.5      | XX                        |
| Can-GyFran        | 2            | 7023.0      | XX                        |
| La-OgenBul        | 3            | 12770.0     | X                         |
| Chi-VellInd       | 3            | 18397.7     | XX                        |
| Can-PearlJa       | 3            | 22120.3     | XX                        |

|               |   |         |      |
|---------------|---|---------|------|
| Dud-QPMAfg    | 3 | 23778.0 | XX   |
| Can-EfJa      | 3 | 30584.3 | XX   |
| La-ErizoSp    | 3 | 51520.0 | XXX  |
| Can-GCHUSA    | 3 | 52089.7 | XXX  |
| Dud-QAPMGeorg | 3 | 56529.0 | XXX  |
| Can-TopUSA    | 3 | 86931.7 | XXXX |
| Mom-MR1Ind    | 3 | 90848.3 | XXXX |
| Can-DulUSA    | 3 | 96301.7 | XXXX |
| Am-NesviGeor  | 3 | 140291. | XXXX |
| Mom-KhaInd    | 3 | 164725. | XXXX |
| Am-AnaFran    | 3 | 194508. | XXXX |
| Can-PGRFran   | 3 | 226967. | XX   |
| Can-Ogen2Is   | 3 | 257670. | XXX  |
| Can-SemUSA    | 2 | 307397. | XX   |
| Can-HBJUSA    | 3 | 356320. | X    |
| In-BBredSp    | 3 | 357409. | X    |
| Am-YokIs      | 2 | 935285. | X    |

#### LSD analysis for S.15 per accessions

Method: 95.0 percentage LSD

| <i>accessions</i> | <i>Cases</i> | <i>Mean</i> | <i>Homogeneous groups</i> |
|-------------------|--------------|-------------|---------------------------|
| Ac-SRKSLan        | 3            | 750.0       | X                         |
| Flex-Co20Ind      | 3            | 750.0       | X                         |
| In-ComunSp        | 2            | 750.0       | XX                        |
| Flex-AryaInd      | 3            | 750.0       | X                         |
| Flex-SnakeSA      | 3            | 750.0       | X                         |
| In-AmAoroSp       | 2            | 750.0       | XX                        |
| In-CrabPor        | 2            | 750.0       | XX                        |
| In-TeNinvSp       | 2            | 750.0       | XX                        |
| In-AmCañSp        | 3            | 750.0       | X                         |
| In-LaBolasSp      | 3            | 750.0       | X                         |
| Ag-WChInd         | 3            | 750.0       | X                         |
| Ac-SV1Ind         | 2            | 750.0       | XX                        |
| Am-KizilUzbe      | 3            | 750.0       | X                         |
| In-BBescrSp       | 3            | 750.0       | X                         |
| In-HoneyDewUSA    | 3            | 750.0       | X                         |
| In-PsPiñSp        | 3            | 750.0       | X                         |
| Can-EanaHun       | 3            | 750.0       | X                         |
| Ac-TGR1551Zimb    | 3            | 750.0       | X                         |
| Am-HassanTur      | 3            | 750.0       | X                         |
| In-TDewUSA        | 3            | 750.0       | X                         |
| Ag-15591Gha       | 3            | 750.0       | X                         |
| Can-NCFran        | 2            | 750.0       | XX                        |
| Can-NOFran        | 2            | 750.0       | XX                        |
| Ag-CallInd        | 3            | 750.0       | X                         |
| Tibish-Ksud       | 3            | 750.0       | X                         |
| Con-BaishChi      | 3            | 750.0       | X                         |
| Ag-TendSud        | 3            | 750.0       | X                         |
| Can-SucrFran      | 3            | 750.0       | X                         |
| In-CGBUSA         | 3            | 750.0       | X                         |
| Am-TokTaj         | 3            | 750.0       | X                         |
| In-RoMoch1Sp      | 3            | 750.0       | X                         |
| In-TeSp           | 3            | 750.0       | X                         |
| chate-CarIta      | 1            | 750.0       | XXXX                      |
| La-ZatIta         | 3            | 750.0       | X                         |
| Con-GMJJa         | 3            | 750.0       | X                         |

|               |   |         |         |
|---------------|---|---------|---------|
| Con-MielChi   | 3 | 750.0   | X       |
| Con-NanChi    | 3 | 750.0   | X       |
| Con-PauPol    | 3 | 750.0   | X       |
| Con-SCKo      | 3 | 750.0   | X       |
| Con-ShiroJa   | 3 | 750.0   | X       |
| Con-FreeCJa   | 3 | 750.0   | X       |
| Can-GyFran    | 2 | 1209.5  | XX      |
| Am-KafEgy     | 2 | 1284.5  | XX      |
| Am-korcaRus   | 3 | 1536.33 | XX      |
| In-TeNinvSp2  | 2 | 1712.0  | XX      |
| In-LaEscrSp   | 2 | 1770.0  | XX      |
| La-KroFran    | 4 | 1930.0  | X       |
| La-CascaPor   | 2 | 2234.5  | XX      |
| Ac-G22843Se   | 3 | 2791.33 | XX      |
| Can-VedFran   | 3 | 3231.33 | XX      |
| Mom-PII24Ind  | 3 | 3248.33 | XX      |
| Chi-VellInd   | 3 | 3675.0  | XX      |
| Dud-QPMAfg    | 3 | 4097.67 | XX      |
| La-OgenBul    | 3 | 4368.0  | XX      |
| Can-PearlJa   | 3 | 6588.0  | XX      |
| Can-EfJa      | 3 | 6777.67 | XX      |
| Dud-QAPMGeorg | 3 | 10239.7 | XXX     |
| Mom-MR1Ind    | 3 | 16336.7 | XXXXXX  |
| La-ErizoSp    | 3 | 17828.0 | XXXXXX  |
| Am-NesviGeor  | 3 | 19127.3 | XXXXXXX |
| Can-GCHUSA    | 3 | 19884.0 | XXXXXXX |
| Can-WiUSA     | 3 | 24919.7 | XXXXXXX |
| Can-Ogen2Is   | 3 | 34570.7 | XXXXXX  |
| Can-PGRFran   | 3 | 41725.0 | XXXXX   |
| Mom-KhaInd    | 3 | 46583.7 | XXXX    |
| Can-DulUSA    | 3 | 49352.7 | XX      |
| Am-AnaFran    | 3 | 52421.3 | X       |
| Can-TopUSA    | 3 | 98670.0 | X       |
| In-BBredSp    | 3 | 106531. | X       |
| Am-YokIs      | 2 | 106831. | X       |
| Can-HBJUSA    | 3 | 153067. | X       |
| Can-SemUSA    | 2 | 276666. | X       |

#### LSD analysis for S.16 per accessions

Method: 95.0 percentage LSD

| <i>accessions</i> | <i>Cases</i> | <i>Mean</i> | <i>Homogeneous groups</i> |
|-------------------|--------------|-------------|---------------------------|
| Tibish-Ksud       | 3            | 750.0       | X                         |
| Ac-SVIInd         | 2            | 750.0       | XXX                       |
| In-CGBUSA         | 3            | 750.0       | X                         |
| In-HoneyDewUSA    | 3            | 750.0       | X                         |
| In-AmAoroSp       | 2            | 750.0       | XXX                       |
| Flex-SnakeSA      | 3            | 750.0       | X                         |
| Ag-WChInd         | 3            | 750.0       | X                         |
| Ac-TGR1551Zimb    | 3            | 750.0       | X                         |
| In-PsPiñSp        | 3            | 750.0       | X                         |
| In-CrabPor        | 2            | 750.0       | XXX                       |
| Con-BaishChi      | 3            | 750.0       | X                         |
| Con-SCKo          | 3            | 750.0       | X                         |
| Con-FreeCJa       | 3            | 750.0       | X                         |
| In-AmCañSp        | 3            | 750.0       | X                         |
| Con-ShiroJa       | 3            | 750.0       | X                         |

|               |   |         |        |
|---------------|---|---------|--------|
| Flex-Co20Ind  | 3 | 750.0   | X      |
| Ac-SRKSLan    | 3 | 750.0   | X      |
| chate-CarIta  | 1 | 750.0   | XXXXXX |
| In-RoMoch1Sp  | 3 | 750.0   | X      |
| Con-GMJJa     | 3 | 750.0   | X      |
| Can-WiUSA     | 3 | 2588.33 | X      |
| Con-MielChi   | 3 | 3355.67 | X      |
| La-ZatIta     | 3 | 4548.67 | X      |
| In-LaEscrSp   | 2 | 4812.5  | XXX    |
| Con-NanChi    | 3 | 5326.33 | X      |
| Dud-QPMAfg    | 3 | 5479.67 | X      |
| Can-GyFran    | 2 | 8046.5  | XXX    |
| In-TeNinvSp2  | 2 | 11604.0 | XXX    |
| Can-NCFran    | 2 | 12738.5 | XXX    |
| Can-GCHUSA    | 3 | 13116.7 | X      |
| Con-PauPol    | 3 | 13586.0 | X      |
| In-BBredSp    | 3 | 13978.0 | X      |
| Can-Ogen2Is   | 3 | 19914.7 | X      |
| Can-HBJUSA    | 3 | 25106.3 | XX     |
| La-KroFran    | 4 | 28429.5 | X      |
| La-CascaPor   | 2 | 28543.5 | XXXXXX |
| Can-DulUSA    | 3 | 33463.7 | XXX    |
| Ag-CallInd    | 3 | 35142.3 | XXX    |
| In-TeNinvSp   | 2 | 36172.5 | XXXXXX |
| Flex-AryaInd  | 3 | 43458.7 | XXX    |
| Can-TopUSA    | 3 | 43952.7 | XXX    |
| Ac-G22843Se   | 3 | 47061.3 | XXX    |
| Can-EanaHun   | 3 | 52084.3 | XXXX   |
| Dud-QAPMGeorg | 3 | 57363.0 | XXXXXX |
| Am-AnaFran    | 3 | 57364.7 | XXXXXX |
| Can-VedFran   | 3 | 58249.3 | XXXXXX |
| Can-SemUSA    | 2 | 59466.0 | XXXXXX |
| Can-NOFran    | 2 | 72985.5 | XXXXXX |
| La-OgenBul    | 3 | 78604.3 | XXXXXX |
| Can-EfJa      | 3 | 81300.7 | XXXXXX |
| In-TeSp       | 3 | 91466.0 | XXXXXX |
| Am-KizilUzbe  | 3 | 95295.0 | XXXXXX |
| Ag-15591Gha   | 3 | 97591.7 | XXXXXX |
| Am-NesviGeor  | 3 | 112136. | XXXXXX |
| Ag-TendSud    | 3 | 125050. | XXXXXX |
| Can-SucrFran  | 3 | 130893. | XXXXXX |
| Am-korcaRus   | 3 | 174841. | XXXXXX |
| Chi-VellInd   | 3 | 179053. | XXXXXX |
| Am-YokIs      | 2 | 191308. | XXXXXX |
| Can-PGRFran   | 3 | 191542. | XXXXXX |
| Am-HassanTur  | 3 | 193144. | XXXXXX |
| Can-PearlJa   | 3 | 199491. | XXXXXX |
| Mom-PII24Ind  | 3 | 211334. | XXXXXX |
| In-ComunSp    | 2 | 269309. | XXXXXX |
| In-LaBolasSp  | 3 | 289726. | XXXX   |
| Mom-KhaInd    | 3 | 292315. | XXX    |
| La-ErizoSp    | 3 | 313600. | XX     |
| Am-KafEgy     | 2 | 350829. | XX     |
| Mom-MR1Ind    | 3 | 629566. | XX     |
| In-BBescrSp   | 3 | 649909. | X      |
| Am-TokTaj     | 3 | 729134. | X      |
| In-TDewUSA    | 3 | 795283. | X      |



# **LSD analysis for S.17 per accessions**

Method: 95.0 percentage LSD

| <i>accessions</i> | <i>Cases</i> | <i>Mean</i> | <i>Homogeneous groups</i> |
|-------------------|--------------|-------------|---------------------------|
| In-BBescrSp       | 3            | 750.0       | X                         |
| Am-KizilUzbe      | 3            | 750.0       | X                         |
| In-CrabPor        | 2            | 750.0       | X                         |
| In-CGBUSA         | 3            | 750.0       | X                         |
| In-ComunSp        | 2            | 750.0       | X                         |
| In-LaEscrSp       | 2            | 750.0       | X                         |
| In-LaBolasSp      | 3            | 750.0       | X                         |
| In-HoneyDewUSA    | 3            | 750.0       | X                         |
| In-TeNinvSp2      | 2            | 750.0       | X                         |
| In-TeNinvSp       | 2            | 750.0       | X                         |
| Con-FreeCJa       | 3            | 750.0       | X                         |
| In-TeSp           | 3            | 750.0       | X                         |
| Ac-SVIInd         | 2            | 750.0       | X                         |
| La-KroFran        | 4            | 750.0       | X                         |
| In-TDewUSA        | 3            | 750.0       | X                         |
| In-RoMoch1Sp      | 3            | 750.0       | X                         |
| chate-Carlta      | 1            | 750.0       | XXX                       |
| In-PsPiñSp        | 3            | 750.0       | X                         |
| Am-HassanTur      | 3            | 750.0       | X                         |
| La-OgenBul        | 3            | 750.0       | X                         |
| Am-KafEgy         | 2            | 750.0       | X                         |
| Ag-15591Gha       | 3            | 750.0       | X                         |
| Can-NOFran        | 2            | 750.0       | X                         |
| Ag-CallInd        | 3            | 750.0       | X                         |
| Am-korcaRus       | 3            | 750.0       | X                         |
| Con-BaishChi      | 3            | 750.0       | X                         |
| Am-TokTaj         | 3            | 750.0       | X                         |
| Can-SucrFran      | 3            | 750.0       | X                         |
| Ag-TendSud        | 3            | 750.0       | X                         |
| Ag-WChInd         | 3            | 750.0       | X                         |
| La-ZatIta         | 3            | 750.0       | X                         |
| La-CascaPor       | 2            | 750.0       | X                         |
| Ac-TGR1551Zimb    | 3            | 750.0       | X                         |
| Tibish-Ksud       | 3            | 750.0       | X                         |
| Con-GMJJa         | 3            | 750.0       | X                         |
| Con-MielChi       | 3            | 750.0       | X                         |
| Con-NanChi        | 3            | 750.0       | X                         |
| Con-PauPol        | 3            | 750.0       | X                         |
| Con-SCKo          | 3            | 750.0       | X                         |
| Con-ShiroJa       | 3            | 750.0       | X                         |
| Ac-SRKSLan        | 3            | 750.0       | X                         |
| Can-GyFran        | 2            | 750.0       | X                         |
| Flex-AryaInd      | 3            | 750.0       | X                         |
| Flex-Co20Ind      | 3            | 750.0       | X                         |
| Flex-SnakeSA      | 3            | 750.0       | X                         |
| In-AmAoroSp       | 2            | 750.0       | X                         |
| In-AmCañSp        | 3            | 750.0       | X                         |
| Can-NCFran        | 2            | 1836.0      | X                         |
| Ac-G22843Se       | 3            | 2205.67     | X                         |
| Can-EfJa          | 3            | 2245.67     | X                         |
| Can-VedFran       | 3            | 2718.0      | X                         |
| Mom-PII24Ind      | 3            | 3423.67     | X                         |

|               |   |         |      |
|---------------|---|---------|------|
| Can-EanaHun   | 3 | 4411.67 | X    |
| Chi-VellInd   | 3 | 4431.67 | X    |
| Can-PearlJa   | 3 | 5468.33 | X    |
| La-ErizoSp    | 3 | 7326.67 | XX   |
| Can-WiUSA     | 3 | 7392.33 | XX   |
| Dud-QAPMGeorg | 3 | 7977.33 | XX   |
| Dud-QPMAfg    | 3 | 11573.0 | XXX  |
| Mom-MR1Ind    | 3 | 11939.7 | XXX  |
| Am-NesviGeor  | 3 | 25636.3 | XXXX |
| Can-GCHUSA    | 3 | 25687.3 | XXXX |
| Can-TopUSA    | 3 | 28410.0 | XXXX |
| Can-Ogen2Is   | 3 | 40250.7 | XXX  |
| Can-DulUSA    | 3 | 42586.7 | XX   |
| Am-AnaFran    | 3 | 44802.0 | XX   |
| Can-SemUSA    | 2 | 61802.5 | XX   |
| Can-PGRFran   | 3 | 83790.0 | XX   |
| In-BBredSp    | 3 | 97101.7 | XX   |
| Mom-KhaInd    | 3 | 102835. | X    |
| Can-HBJUSA    | 3 | 116894. | X    |
| Am-YokIs      | 2 | 205182. | X    |

#### LSD analysis for S.18 per accessions

Method: 95.0 percentage LSD

| <i>accessions</i> | <i>Cases</i> | <i>Mean</i> | <i>Homogeneous groups</i> |
|-------------------|--------------|-------------|---------------------------|
| In-ComunSp        | 2            | 750.0       | X                         |
| In-HoneyDewUSA    | 3            | 750.0       | X                         |
| In-CrabPor        | 2            | 750.0       | X                         |
| In-LaEscrSp       | 2            | 750.0       | X                         |
| In-TeNinvSp2      | 2            | 750.0       | X                         |
| In-TeNinvSp       | 2            | 750.0       | X                         |
| In-LaBolasSp      | 3            | 750.0       | X                         |
| In-TeSp           | 3            | 750.0       | X                         |
| In-PsPiñSp        | 3            | 750.0       | X                         |
| Ag-15591Gha       | 3            | 750.0       | X                         |
| Ac-G22843Se       | 3            | 750.0       | X                         |
| La-KroFran        | 4            | 750.0       | X                         |
| Ac-SVIInd         | 2            | 750.0       | X                         |
| Con-BaishChi      | 3            | 750.0       | X                         |
| La-CascaPor       | 2            | 750.0       | X                         |
| In-TDewUSA        | 3            | 750.0       | X                         |
| Can-EanaHun       | 3            | 750.0       | X                         |
| chate-Carlta      | 1            | 750.0       | XXX                       |
| Ac-SRKSLan        | 3            | 750.0       | X                         |
| In-RoMoch1Sp      | 3            | 750.0       | X                         |
| Am-KafEgy         | 2            | 750.0       | X                         |
| Can-NCFran        | 2            | 750.0       | X                         |
| Can-NOFran        | 2            | 750.0       | X                         |
| Ag-CallInd        | 3            | 750.0       | X                         |
| Con-FreeCJa       | 3            | 750.0       | X                         |
| Ag-WChInd         | 3            | 750.0       | X                         |
| Am-TokTaj         | 3            | 750.0       | X                         |
| Can-SucrFran      | 3            | 750.0       | X                         |
| Ag-TendSud        | 3            | 750.0       | X                         |
| Tibish-Ksud       | 3            | 750.0       | X                         |
| Am-korcaRus       | 3            | 750.0       | X                         |
| Can-WiUSA         | 3            | 750.0       | X                         |

|                |   |         |      |
|----------------|---|---------|------|
| Ac-TGR1551Zimb | 3 | 750.0   | X    |
| La-ZatIta      | 3 | 750.0   | X    |
| Con-GMJJa      | 3 | 750.0   | X    |
| Con-MielChi    | 3 | 750.0   | X    |
| Con-NanChi     | 3 | 750.0   | X    |
| Con-PauPol     | 3 | 750.0   | X    |
| Con-SCKo       | 3 | 750.0   | X    |
| Con-ShiroJa    | 3 | 750.0   | X    |
| Am-HassanTur   | 3 | 750.0   | X    |
| Can-GyFran     | 2 | 750.0   | X    |
| Flex-AryaInd   | 3 | 750.0   | X    |
| Flex-Co20Ind   | 3 | 750.0   | X    |
| Flex-SnakeSA   | 3 | 750.0   | X    |
| In-AmAoroSp    | 2 | 750.0   | X    |
| In-AmCañSp     | 3 | 750.0   | X    |
| In-BBescrSp    | 3 | 750.0   | X    |
| Am-KizilUzbe   | 3 | 750.0   | X    |
| In-CGBUSA      | 3 | 750.0   | X    |
| Mom-PII24Ind   | 3 | 1409.0  | X    |
| La-OgenBul     | 3 | 1732.0  | X    |
| Can-VedFran    | 3 | 2429.33 | X    |
| Dud-QAPMGeorg  | 3 | 4223.33 | X    |
| Can-GCHUSA     | 3 | 4672.67 | X    |
| Dud-QPMAfg     | 3 | 4823.0  | X    |
| Can-EfJa       | 3 | 5226.33 | X    |
| Chi-VellInd    | 3 | 5535.67 | X    |
| Can-PearlJa    | 3 | 6089.33 | XX   |
| Am-NesviGeor   | 3 | 7768.0  | XX   |
| Mom-MR1Ind     | 3 | 11025.3 | XXX  |
| La-ErizoSp     | 3 | 13313.3 | XXX  |
| Can-DulUSA     | 3 | 14264.3 | XXX  |
| Can-PGRFran    | 3 | 16617.0 | XXX  |
| Can-TopUSA     | 3 | 20327.3 | XXXX |
| Am-AnaFran     | 3 | 31270.0 | XXX  |
| Can-Ogen2Is    | 3 | 32994.0 | XX   |
| Mom-KhaInd     | 3 | 42868.0 | XX   |
| Can-SemUSA     | 2 | 44873.0 | XX   |
| In-BBredSp     | 3 | 62496.3 | X    |
| Can-HBJUSA     | 3 | 64949.3 | X    |
| Am-YokIs       | 2 | 187226. | X    |

#### LSD analysis for S.19 per accessions

Method: 95.0 percentage LSD

| <i>accessions</i> | <i>Cases</i> | <i>Mean</i> | <i>Homogeneous groups</i> |
|-------------------|--------------|-------------|---------------------------|
| In-CGBUSA         | 3            | 750.0       | XX                        |
| Am-KizilUzbe      | 3            | 750.0       | XX                        |
| In-ComunSp        | 2            | 750.0       | XX                        |
| In-LaEscrSp       | 2            | 750.0       | XX                        |
| In-LaBolasSp      | 3            | 750.0       | XX                        |
| In-RoMoch1Sp      | 3            | 750.0       | XX                        |
| In-CrabPor        | 2            | 750.0       | XX                        |
| In-PsPiñSp        | 3            | 750.0       | XX                        |
| In-TDewUSA        | 3            | 750.0       | XX                        |
| Ag-15591Gha       | 3            | 750.0       | XX                        |
| In-TeNinvSp       | 2            | 750.0       | XX                        |
| La-KroFran        | 4            | 750.0       | X                         |

|                |   |         |      |
|----------------|---|---------|------|
| Ac-SVIIInd     | 2 | 750.0   | XX   |
| Ag-WChInd      | 3 | 750.0   | XX   |
| In-HoneyDewUSA | 3 | 750.0   | XX   |
| In-TeSp        | 3 | 750.0   | XX   |
| In-TeNinvSp2   | 2 | 750.0   | XX   |
| chate-CarIta   | 1 | 750.0   | XXX  |
| Am-HassanTur   | 3 | 750.0   | XX   |
| Am-korcaRus    | 3 | 750.0   | XX   |
| Am-KafEgy      | 2 | 750.0   | XX   |
| Can-NCFran     | 2 | 750.0   | XX   |
| Can-NOFran     | 2 | 750.0   | XX   |
| Ag-CallInd     | 3 | 750.0   | XX   |
| Con-BaishChi   | 3 | 750.0   | XX   |
| La-OgenBul     | 3 | 750.0   | XX   |
| Am-TokTaj      | 3 | 750.0   | XX   |
| Can-SucrFran   | 3 | 750.0   | XX   |
| Ag-TendSud     | 3 | 750.0   | XX   |
| Tibish-Ksud    | 3 | 750.0   | XX   |
| La-CascaPor    | 2 | 750.0   | XX   |
| Con-FreeCJa    | 3 | 750.0   | XX   |
| Ac-TGR1551Zimb | 3 | 750.0   | XX   |
| La-ZatIta      | 3 | 750.0   | XX   |
| Con-GMJJa      | 3 | 750.0   | XX   |
| Con-MielChi    | 3 | 750.0   | XX   |
| Con-NanChi     | 3 | 750.0   | XX   |
| Con-PauPol     | 3 | 750.0   | XX   |
| Con-SCKo       | 3 | 750.0   | XX   |
| Con-ShiroJa    | 3 | 750.0   | XX   |
| Ac-SRKSLan     | 3 | 750.0   | XX   |
| Can-GyFran     | 2 | 750.0   | XX   |
| Flex-AryaInd   | 3 | 750.0   | XX   |
| Flex-Co20Ind   | 3 | 750.0   | XX   |
| Flex-SnakeSA   | 3 | 750.0   | XX   |
| In-AmAoroSp    | 2 | 750.0   | XX   |
| In-AmCañSp     | 3 | 750.0   | XX   |
| In-BBescrSp    | 3 | 750.0   | XX   |
| Ac-G22843Se    | 3 | 1372.0  | XX   |
| Can-WiUSA      | 3 | 1829.33 | XX   |
| Mom-PII24Ind   | 3 | 2244.33 | XX   |
| Can-EanaHun    | 3 | 2356.0  | XX   |
| Dud-QAPMGeorg  | 3 | 3355.33 | XX   |
| Can-VedFran    | 3 | 3810.33 | XX   |
| Can-EfJa       | 3 | 4477.33 | XX   |
| Dud-QPMAfg     | 3 | 5869.33 | XXX  |
| Can-PearlJa    | 3 | 6410.33 | XXX  |
| Chi-VellInd    | 3 | 6425.67 | XXX  |
| Am-NesviGeor   | 3 | 6746.67 | XXX  |
| Mom-MR1Ind     | 3 | 8106.0  | XXX  |
| La-ErizoSp     | 3 | 8930.67 | XXX  |
| Can-GCHUSA     | 3 | 9820.33 | XXX  |
| Can-DulUSA     | 3 | 18309.3 | XXX  |
| Can-PGRFran    | 3 | 21225.3 | XXXX |
| Can-Ogen2Is    | 3 | 25888.3 | XXX  |
| Am-AnaFran     | 3 | 31222.3 | XXX  |
| Can-TopUSA     | 3 | 31244.0 | XXX  |
| Can-SemUSA     | 2 | 33632.0 | XXXX |
| Mom-KhaInd     | 3 | 46294.7 | XXX  |

|            |   |         |    |
|------------|---|---------|----|
| In-BBredSp | 3 | 54870.3 | XX |
| Can-HBJUSA | 3 | 59845.0 | X  |
| Am-YokIs   | 2 | 165477. | X  |

#### LSD analysis for SC.1 per accessions

Method: 95.0 percentage LSD

| <i>accessions</i> | <i>Cases</i> | <i>Mean</i> | <i>Homogeneous groups</i> |
|-------------------|--------------|-------------|---------------------------|
| In-TeNinvSp       | 2            | 750.0       | X                         |
| Con-SCKo          | 3            | 750.0       | X                         |
| Con-ShiroJa       | 3            | 750.0       | X                         |
| In-RoMoch1Sp      | 3            | 750.0       | X                         |
| In-PsPiñSp        | 3            | 750.0       | X                         |
| Ag-WChInd         | 3            | 750.0       | X                         |
| Con-FreeCJa       | 3            | 750.0       | X                         |
| Con-GMJJa         | 3            | 750.0       | X                         |
| Ac-SVIIInd        | 2            | 750.0       | X                         |
| Ac-TGR1551Zimb    | 3            | 750.0       | X                         |
| In-CGBUSA         | 3            | 750.0       | X                         |
| Ac-SRKSLan        | 3            | 750.0       | X                         |
| Flex-Co20Ind      | 3            | 1827.0      | X                         |
| In-AmAoroSp       | 2            | 2018.5      | X                         |
| La-ZatIta         | 3            | 2170.67     | X                         |
| Can-NCFran        | 2            | 2336.0      | XX                        |
| Con-MielChi       | 3            | 2533.67     | X                         |
| Con-NanChi        | 3            | 2644.67     | X                         |
| Can-SucrFran      | 3            | 2702.67     | X                         |
| In-CrabPor        | 2            | 2932.5      | XX                        |
| Ag-CallInd        | 3            | 2948.0      | X                         |
| Dud-QPMAfg        | 3            | 3340.67     | X                         |
| In-BBredSp        | 3            | 4852.33     | X                         |
| Can-HBJUSA        | 3            | 5083.67     | X                         |
| La-OgenBul        | 3            | 5482.33     | X                         |
| chate-CarIta      | 1            | 6150.0      | XXX                       |
| In-HoneyDewUSA    | 3            | 6413.33     | X                         |
| In-AmCañSp        | 3            | 7394.67     | X                         |
| Con-BaishChi      | 3            | 8779.33     | X                         |
| Chi-VellInd       | 3            | 9916.67     | X                         |
| Am-AnaFran        | 3            | 10685.7     | X                         |
| Can-TopUSA        | 3            | 11393.0     | X                         |
| Can-DulUSA        | 3            | 12616.7     | X                         |
| Am-KizilUzbe      | 3            | 12720.0     | X                         |
| In-BBescrSp       | 3            | 12824.3     | X                         |
| In-LaEscrSp       | 2            | 13226.0     | XX                        |
| Dud-QAPMGeorg     | 3            | 13578.0     | XX                        |
| Can-EfJa          | 3            | 15935.3     | XX                        |
| Can-Ogen2Is       | 3            | 17737.7     | XX                        |
| Flex-AryaInd      | 3            | 19942.0     | XX                        |
| In-TeNinvSp2      | 2            | 21081.0     | XX                        |
| Can-VedFran       | 3            | 24448.3     | XX                        |
| La-CascaPor       | 2            | 28066.0     | XXX                       |
| Can-GyFran        | 2            | 28138.5     | XXX                       |
| Can-NOFran        | 2            | 31830.0     | XXX                       |
| Can-GCHUSA        | 3            | 33757.0     | XX                        |
| Tibish-Ksud       | 3            | 34442.3     | XX                        |
| Can-PearlJa       | 3            | 36789.7     | XXX                       |
| La-KroFran        | 4            | 38434.8     | XX                        |

|              |   |         |        |
|--------------|---|---------|--------|
| Can-PGRFran  | 3 | 40867.7 | XXX    |
| In-TeSp      | 3 | 41498.0 | XXX    |
| Flex-SnakeSA | 3 | 45515.0 | XXX    |
| Con-PauPol   | 3 | 47681.0 | XXX    |
| Mom-PII24Ind | 3 | 57531.0 | XXX    |
| In-TDewUSA   | 3 | 57696.3 | XXX    |
| Can-EanaHun  | 3 | 63353.0 | XXXX   |
| Mom-MR1Ind   | 3 | 70410.0 | XXXXXX |
| Am-TokTaj    | 3 | 75167.0 | XXXXXX |
| Can-WiUSA    | 3 | 76031.7 | XXXXXX |
| La-ErizoSp   | 3 | 76752.0 | XXXXXX |
| Am-korcaRus  | 3 | 86667.0 | XXXXXX |
| Am-KafEgy    | 2 | 95689.0 | XXXXXX |
| Am-NesviGeor | 3 | 98856.0 | XXXXXX |
| In-ComunSp   | 2 | 123837. | XXXXXX |
| Can-SemUSA   | 2 | 146701. | XXXXXX |
| In-LaBolasSp | 3 | 159760. | XXXX   |
| Mom-KhaInd   | 3 | 165917. | XXX    |
| Am-YokIs     | 2 | 202779. | XXX    |
| Ac-G22843Se  | 3 | 218899. | XX     |
| Am-HassanTur | 3 | 279250. | X      |
| Ag-TendSud   | 3 | 620998. | X      |
| Ag-15591Gha  | 3 | 766108. | X      |

#### LSD analysis for SC.2 per accessions

Method: 95.0 percentage LSD

| <i>accessions</i> | <i>Cases</i> | <i>Mean</i> | <i>Homogeneous groups</i> |
|-------------------|--------------|-------------|---------------------------|
| chate-CarIta      | 1            | 750.0       | XXXXXXXX                  |
| In-RoMoch1Sp      | 3            | 750.0       | X                         |
| In-AmAoroSp       | 2            | 750.0       | XXX                       |
| Flex-Co20Ind      | 3            | 750.0       | X                         |
| In-PsPiñSp        | 3            | 750.0       | X                         |
| Ag-WChInd         | 3            | 750.0       | X                         |
| Ac-TGR1551Zimb    | 3            | 750.0       | X                         |
| Con-FreeCJa       | 3            | 750.0       | X                         |
| Ac-SV1Ind         | 2            | 750.0       | XXX                       |
| Con-ShiroJa       | 3            | 750.0       | X                         |
| Ac-SRKSLan        | 3            | 750.0       | X                         |
| In-CGBUSA         | 3            | 750.0       | X                         |
| Tibish-Ksud       | 3            | 750.0       | X                         |
| Ag-TendSud        | 3            | 858.333     | X                         |
| In-TeNinvSp       | 2            | 1733.0      | XXX                       |
| Ag-15591Gha       | 3            | 2631.33     | XX                        |
| In-HoneyDewUSA    | 3            | 3495.0      | XX                        |
| Con-GMJJa         | 3            | 4071.0      | XX                        |
| Can-SucrFran      | 3            | 4419.0      | XX                        |
| Con-NanChi        | 3            | 4699.67     | XX                        |
| Mom-MR1Ind        | 3            | 5357.67     | XX                        |
| Can-NCFran        | 2            | 6155.5      | XXXX X                    |
| In-BBredSp        | 3            | 6741.0      | XX                        |
| La-ZatIta         | 3            | 8113.33     | XXX                       |
| Mom-KhaInd        | 3            | 8582.67     | XXX                       |
| La-CascaPor       | 2            | 9358.5      | XXXXXX                    |
| Con-SCKo          | 3            | 9379.0      | XXX                       |
| Flex-SnakeSA      | 3            | 10292.7     | XXX                       |
| Am-AnaFran        | 3            | 11251.7     | XXX                       |

|               |   |         |            |
|---------------|---|---------|------------|
| Chi-VellInd   | 3 | 11954.0 | XXX        |
| Ac-G22843Se   | 3 | 12012.7 | XXX        |
| Can-DulUSA    | 3 | 13255.7 | XXX X      |
| In-CrabPor    | 2 | 14540.0 | XXXXXXX    |
| Con-MielChi   | 3 | 16196.0 | XXXX X     |
| Flex-AryaInd  | 3 | 16558.7 | XXXX X     |
| Can-PGRFran   | 3 | 17244.7 | XXXX X     |
| Ag-CallInd    | 3 | 17333.7 | XXXX X     |
| Con-PauPol    | 3 | 17390.7 | XXXX X     |
| In-LaEscrSp   | 2 | 17544.5 | XXXXXXX    |
| Can-TopUSA    | 3 | 18805.0 | XXXXXXX    |
| Dud-QPMAfg    | 3 | 19872.7 | XXXXXXX    |
| Can-NOFran    | 2 | 20779.0 | XXXXXXX    |
| Can-GyFran    | 2 | 20930.0 | XXXXXXX    |
| In-BBescrSp   | 3 | 22511.7 | XXXXXXX    |
| Can-VedFran   | 3 | 26249.0 | XXXXXXX    |
| Can-HBJUSA    | 3 | 29242.0 | XXXXXXX    |
| Am-KizilUzbe  | 3 | 30162.7 | XXXXXXX    |
| Dud-QAPMGeorg | 3 | 33260.0 | XXXXXXX    |
| Can-WiUSA     | 3 | 35747.0 | XXXXXXX    |
| Am-KafEgy     | 2 | 36916.5 | XXXXXXXXX  |
| Am-TokTaj     | 3 | 39324.7 | XXXXXXXXX  |
| Am-HassanTur  | 3 | 47780.7 | XXXXXXXXX  |
| Can-EanaHun   | 3 | 52160.0 | XXXXXXXXX  |
| La-KroFran    | 4 | 55114.5 | XXXXXXXXX  |
| In-TeSp       | 3 | 56294.0 | XXXXXXXXX  |
| Can-Ogen2Is   | 3 | 57472.7 | XXXXXXXXX  |
| Am-YokIs      | 2 | 75535.5 | XXXXXXXXXX |
| Con-BaishChi  | 3 | 90041.3 | XXXXXXXXXX |
| In-TDewUSA    | 3 | 92733.7 | XXXXXXXXXX |
| Am-korcaRus   | 3 | 99280.7 | XXXXXXXXX  |
| In-LaBolasSp  | 3 | 105884. | XX XXXX    |
| Can-PearlJa   | 3 | 107066. | XX XXXX    |
| Mom-PII24Ind  | 3 | 109069. | X XXXX     |
| In-ComunSp    | 2 | 114830. | XXXXXXXXX  |
| In-AmCañSp    | 3 | 124473. | XXXXX      |
| Am-NesviGeor  | 3 | 127813. | XXX        |
| La-OgenBul    | 3 | 176272. | XXX        |
| Can-EfJa      | 3 | 193197. | XXX        |
| La-ErizoSp    | 3 | 236740. | XXX        |
| Can-GCHUSA    | 3 | 271882. | XX         |
| In-TeNinvSp2  | 2 | 283596. | XX         |
| Can-SemUSA    | 2 | 328701. | X          |

#### LSD analysis for SC.3 per accessions

Method: 95.0 percentage LSD

| <i>accessions</i> | <i>Cases</i> | <i>Mean</i> | <i>Homogeneous groups</i> |
|-------------------|--------------|-------------|---------------------------|
| In-PsPiñSp        | 3            | 750.0       | X                         |
| In-CGBUSA         | 3            | 750.0       | X                         |
| Ac-SVIIInd        | 2            | 750.0       | XX                        |
| Ac-TGR1551Zimb    | 3            | 750.0       | X                         |
| Ag-WChInd         | 3            | 750.0       | X                         |
| Con-SCKo          | 3            | 750.0       | X                         |
| Con-NanChi        | 3            | 750.0       | X                         |
| Ac-SRKSLan        | 3            | 750.0       | X                         |
| Con-ShiroJa       | 3            | 750.0       | X                         |

|                |   |         |         |
|----------------|---|---------|---------|
| Con-FreeCJa    | 3 | 750.0   | X       |
| Tibish-Ksud    | 3 | 750.0   | X       |
| Flex-Co20Ind   | 3 | 750.0   | X       |
| Con-GMJJa      | 3 | 1968.0  | X       |
| La-CascaPor    | 2 | 2407.5  | XX      |
| Am-AnaFran     | 3 | 2649.33 | X       |
| Can-DulUSA     | 3 | 2788.67 | X       |
| In-AmAoroSp    | 2 | 3326.0  | XX      |
| In-RoMoch1Sp   | 3 | 3396.0  | X       |
| Can-HBJUSA     | 3 | 6110.33 | X       |
| In-HoneyDewUSA | 3 | 7632.33 | X       |
| chate-CarIta   | 1 | 9430.0  | XXXXX   |
| In-TeNinvSp2   | 2 | 11613.5 | XX      |
| In-BBredSp     | 3 | 13852.3 | X       |
| Can-NCFran     | 2 | 13920.0 | XX      |
| Can-SemUSA     | 2 | 18863.5 | XXX     |
| Flex-SnakeSA   | 3 | 19427.3 | X       |
| Can-SucrFran   | 3 | 22739.7 | X       |
| La-ZatIta      | 3 | 23148.3 | X       |
| La-KroFran     | 4 | 23900.0 | X       |
| Chi-VellInd    | 3 | 24269.0 | X       |
| Can-NOFran     | 2 | 25588.0 | XXX     |
| Dud-QAPMGeorg  | 3 | 26631.7 | X       |
| In-CrabPor     | 2 | 27388.5 | XXXXX   |
| Can-TopUSA     | 3 | 29658.3 | XX      |
| Mom-KhaInd     | 3 | 31071.0 | XX      |
| Am-korcaRus    | 3 | 32844.3 | XX      |
| In-LaEscrSp    | 2 | 32935.0 | XXXXX   |
| Con-MielChi    | 3 | 34439.3 | XX      |
| In-BBescrSp    | 3 | 37309.0 | XX      |
| In-TeSp        | 3 | 38516.0 | XX      |
| Am-KizilUzbe   | 3 | 38699.3 | XX      |
| Con-BaishChi   | 3 | 40504.3 | XX      |
| In-ComunSp     | 2 | 49570.0 | XXXXX   |
| In-TDewUSA     | 3 | 52764.0 | XXX     |
| Dud-QPMAfg     | 3 | 55446.0 | XXX     |
| In-AmCañSp     | 3 | 60849.3 | XXXXX   |
| Can-GCHUSA     | 3 | 61940.0 | XXXXX   |
| Am-TokTaj      | 3 | 62570.7 | XXXXX   |
| Con-PauPol     | 3 | 68214.3 | XXXXX   |
| Can-EfJa       | 3 | 73609.7 | XXXXX   |
| Can-PGRFran    | 3 | 79396.0 | XXXXX   |
| Ag-CallInd     | 3 | 82973.7 | XXXXX   |
| Flex-AryaInd   | 3 | 84348.7 | XXXXX   |
| In-TeNinvSp    | 2 | 88350.0 | XXXXX   |
| Can-GyFran     | 2 | 88571.0 | XXXXX   |
| Ag-15591Gha    | 3 | 91621.0 | XXXXX   |
| Am-YokIs       | 2 | 129212. | XXXXXX  |
| Am-NesviGeor   | 3 | 134004. | XXXXXX  |
| La-OgenBul     | 3 | 156883. | XXXXXX  |
| Mom-PII24Ind   | 3 | 158847. | XXXXXX  |
| Am-KafEgy      | 2 | 165009. | XXXXXXX |
| Can-VedFran    | 3 | 193533. | XXXXXX  |
| Mom-MR1Ind     | 3 | 207282. | XXXXXXX |
| Am-HassanTur   | 3 | 217092. | XXXXXXX |
| La-ErizoSp     | 3 | 227135. | XXXXXXX |
| Can-PearlJa    | 3 | 298060. | XXXXXXX |



|              |   |         |         |
|--------------|---|---------|---------|
| Ag-TendSud   | 3 | 314749. | xxxxxxx |
| Can-WiUSA    | 3 | 327780. | xxxxxx  |
| In-LaBolasSp | 3 | 399185. | xxxxx   |
| Can-EanaHun  | 3 | 463073. | xxx     |
| Can-Ogen2Is  | 3 | 535520. | xx      |
| Ac-G22843Se  | 3 | 571005. | x       |

#### LSD analysis for SC.4 per accessions

Method: 95.0 percentage LSD

| <i>accessions</i> | <i>Cases</i> | <i>Mean</i> | <i>Homogeneous groups</i> |
|-------------------|--------------|-------------|---------------------------|
| In-CGBUSA         | 3            | 750.0       | x                         |
| Ac-SRKSLan        | 3            | 750.0       | x                         |
| Con-FreeCJa       | 3            | 750.0       | x                         |
| Ag-WChInd         | 3            | 750.0       | x                         |
| Tibish-Ksud       | 3            | 750.0       | x                         |
| Ac-SVIIInd        | 2            | 750.0       | xxxx                      |
| Ac-TGR1551Zimb    | 3            | 750.0       | x                         |
| In-RoMoch1Sp      | 3            | 750.0       | x                         |
| Ag-15591Gha       | 3            | 750.0       | x                         |
| In-PsPiñSp        | 3            | 750.0       | x                         |
| Con-ShiroJa       | 3            | 1340.0      | x                         |
| Ag-TendSud        | 3            | 2144.33     | x                         |
| In-AmAoroSp       | 2            | 3542.0      | xxxx                      |
| Flex-Co20Ind      | 3            | 4528.67     | x                         |
| Con-GMJJa         | 3            | 8365.67     | x                         |
| In-HoneyDewUSA    | 3            | 10713.7     | x                         |
| In-BBredSp        | 3            | 12695.7     | x                         |
| In-TeNinvSp       | 2            | 13218.5     | xxxx                      |
| Flex-SnakeSA      | 3            | 22532.3     | xx                        |
| In-CrabPor        | 2            | 22648.0     | xxxx                      |
| Con-NanChi        | 3            | 23552.7     | xx                        |
| chate-Carlta      | 1            | 28763.0     | xxxxxxxxxx                |
| Can-NCFran        | 2            | 42353.5     | xxxx x                    |
| Con-SCKo          | 3            | 58063.3     | xx                        |
| La-ZatIta         | 3            | 68875.7     | xx x                      |
| Chi-VellInd       | 3            | 74376.7     | xx x                      |
| Mom-KhaInd        | 3            | 78688.7     | xx x                      |
| Can-HBJUSA        | 3            | 80659.0     | xx x                      |
| In-LaEscrSp       | 2            | 102920.     | xxxxx x x                 |
| In-BBescrSp       | 3            | 106071.     | xxxx                      |
| Con-PauPol        | 3            | 115196.     | xxxx                      |
| Con-MielChi       | 3            | 127346.     | xxxx x                    |
| La-CascaPor       | 2            | 130480.     | xxxxx xxx                 |
| Flex-AryaInd      | 3            | 137989.     | xxxx x                    |
| Con-BaishChi      | 3            | 139082.     | xxxx x                    |
| Ac-G22843Se       | 3            | 168019.     | xxxx x x                  |
| Can-SucrFran      | 3            | 178073.     | xxxxx x x                 |
| In-AmCañSp        | 3            | 210311.     | xxxxx x x                 |
| Dud-QPMAfg        | 3            | 223261.     | xxxxx xxx                 |
| Can-TopUSA        | 3            | 233029.     | xxxxx xxx                 |
| Can-DulUSA        | 3            | 236934.     | xxxxx xxx                 |
| Dud-QAPMGeorg     | 3            | 288279.     | xxxxxxxxxx                |
| Ag-CallInd        | 3            | 310010.     | xxxxxxxxxx                |
| In-TDewUSA        | 3            | 334314.     | xxxxxxxxxx                |
| Am-AnaFran        | 3            | 374712.     | xxxxxxxxxx                |
| Am-KizilUzbe      | 3            | 385547.     | xxxxxxxxxx                |

|              |   |           |              |
|--------------|---|-----------|--------------|
| Can-GyFran   | 2 | 488974.   | XXXXXXXXXX   |
| Am-TokTaj    | 3 | 500746.   | XXXXXXXXXX   |
| Mom-PII24Ind | 3 | 514187.   | XXXXXXXXXX   |
| Mom-MRIInd   | 3 | 531190.   | XXXXXXXXXX   |
| Can-EanaHun  | 3 | 589452.   | XXXXXXXXXX   |
| Can-WiUSA    | 3 | 747997.   | XXXXXXXXXX   |
| Can-PGRFran  | 3 | 801888.   | XXXXXXXXXX   |
| Am-HassanTur | 3 | 868825.   | X XXXXXXXX   |
| Am-KafEgy    | 2 | 941865.   | XXXXXXXXXXXX |
| Can-VedFran  | 3 | 954153.   | XX X XXXX    |
| La-KroFran   | 4 | 978689.   | X XXX        |
| Can-NOFran   | 2 | 992278.   | XXXXXXXXXX   |
| Can-Ogen2Is  | 3 | 992620.   | X X XXXXX    |
| Am-YokIs     | 2 | 1.02675E6 | XX XXXXXXX   |
| Am-korcaRus  | 3 | 1.19017E6 | XXXXX        |
| In-TeSp      | 3 | 1.19401E6 | XXXXX        |
| In-TeNinvSp2 | 2 | 1.36012E6 | XXXXXXX      |
| In-LaBolasSp | 3 | 1.40388E6 | XXXXX        |
| Can-PearlJa  | 3 | 1.42584E6 | XXXXX        |
| In-ComunSp   | 2 | 1.67704E6 | XXXXX        |
| La-ErizoSp   | 3 | 1.72724E6 | XXXXX        |
| Can-SemUSA   | 2 | 1.85678E6 | XXX          |
| La-OgenBul   | 3 | 2.06717E6 | XX           |
| Can-EfJa     | 3 | 2.07224E6 | XX           |
| Am-NesviGeor | 3 | 2.21765E6 | X            |
| Can-GCHUSA   | 3 | 3.87096E6 | X            |

#### LSD analysis for SC.5 per accessions

Method: 95.0 percentage LSD

| <i>accessions</i> | <i>Cases</i> | <i>Mean</i> | <i>Homogeneous groups</i> |
|-------------------|--------------|-------------|---------------------------|
| In-CGBUSA         | 3            | 750.0       | X                         |
| Can-SemUSA        | 2            | 750.0       | X                         |
| Tibish-Ksud       | 3            | 750.0       | X                         |
| Ac-SRKSLan        | 3            | 750.0       | X                         |
| In-RoMoch1Sp      | 3            | 750.0       | X                         |
| Ac-TGR1551Zimb    | 3            | 750.0       | X                         |
| In-HoneyDewUSA    | 3            | 750.0       | X                         |
| Ac-SVInd          | 2            | 750.0       | X                         |
| Con-FreeCJa       | 3            | 750.0       | X                         |
| Con-ShiroJa       | 3            | 750.0       | X                         |
| In-PsPiñSp        | 3            | 750.0       | X                         |
| In-BBredSp        | 3            | 750.0       | X                         |
| Flex-Co20Ind      | 3            | 750.0       | X                         |
| In-AmAoroSp       | 2            | 750.0       | X                         |
| Ag-WChInd         | 3            | 750.0       | X                         |
| In-BBescrSp       | 3            | 1361.67     | X                         |
| Can-HBJUSA        | 3            | 1521.67     | X                         |
| Con-SCKo          | 3            | 3555.0      | X                         |
| Con-GMJJa         | 3            | 3885.0      | X                         |
| In-CrabPor        | 2            | 4179.5      | X                         |
| In-TeNinvSp2      | 2            | 6867.5      | X                         |
| Con-NanChi        | 3            | 17594.3     | X                         |
| In-TDewUSA        | 3            | 22759.0     | X                         |
| chate-CarIta      | 1            | 22810.0     | XXXXXX                    |
| In-AmCañSp        | 3            | 23859.0     | X                         |
| Can-DulUSA        | 3            | 26280.0     | X                         |

|               |   |           |          |
|---------------|---|-----------|----------|
| La-ErizoSp    | 3 | 30195.3   | X        |
| Am-TokTaj     | 3 | 37801.0   | X        |
| In-TeNinvSp   | 2 | 40634.5   | XX       |
| Chi-VellInd   | 3 | 47661.7   | X        |
| Am-korcaRus   | 3 | 61431.0   | X        |
| Can-TopUSA    | 3 | 83182.7   | X        |
| Ag-CallInd    | 3 | 86721.7   | X        |
| Can-EfJa      | 3 | 94606.7   | X        |
| In-LaBolasSp  | 3 | 97937.0   | XX       |
| In-ComunSp    | 2 | 99883.5   | XXX      |
| La-KroFran    | 4 | 104700.   | X        |
| Flex-AryaInd  | 3 | 133398.   | XX       |
| Mom-PII24Ind  | 3 | 135452.   | XX       |
| Dud-QPMAfg    | 3 | 146775.   | XX       |
| Am-AnaFran    | 3 | 151671.   | XX       |
| Am-NesviGeor  | 3 | 162879.   | XXX      |
| Am-KizilUzbe  | 3 | 184272.   | XXXX     |
| Dud-QAPMGeorg | 3 | 192813.   | XXXX     |
| Am-HassanTur  | 3 | 194941.   | XXXX     |
| Can-PGRFran   | 3 | 227323.   | XXXXX    |
| In-LaEscrSp   | 2 | 238593.   | XXXXXX   |
| Ag-TendSud    | 3 | 239708.   | XXXXX    |
| Flex-SnakeSA  | 3 | 248339.   | XXXXX    |
| Can-NCFran    | 2 | 250980.   | XXXXXX   |
| Con-PauPol    | 3 | 261542.   | XXXXX    |
| La-CascaPor   | 2 | 271503.   | XXXXXXX  |
| Can-PearlJa   | 3 | 303946.   | XXXXXXX  |
| Am-YokIs      | 2 | 428934.   | XXXXXXXX |
| Can-Ogen2Is   | 3 | 440416.   | XXXXXXXX |
| Am-KafEgy     | 2 | 472166.   | XXXXXXXX |
| La-OgenBul    | 3 | 521593.   | XXXXXXXX |
| Mom-KhaInd    | 3 | 546143.   | XXXXXXXX |
| Con-MielChi   | 3 | 574349.   | XXXXXXXX |
| Can-SucrFran  | 3 | 579458.   | XXXXXXXX |
| Con-BaishChi  | 3 | 583423.   | XXXXXXXX |
| Can-EanaHun   | 3 | 729910.   | XXXXXXXX |
| Can-VedFran   | 3 | 791094.   | XXXXXXXX |
| Can-WiUSA     | 3 | 818192.   | XXXXXX   |
| Can-GCHUSA    | 3 | 833993.   | XXXXX    |
| Ac-G22843Se   | 3 | 838765.   | XXXXX    |
| In-TeSp       | 3 | 903336.   | XXXX     |
| Can-GyFran    | 2 | 924760.   | XXXXX    |
| Mom-MR1Ind    | 3 | 968006.   | XXX      |
| Can-NOFran    | 2 | 1.0612E6  | XX       |
| La-ZatIta     | 3 | 1.3065E6  | X        |
| Ag-15591Gha   | 3 | 2.81129E6 | X        |

#### LSD analysis for SC.6 per accessions

Method: 95.0 percentage LSD

| <i>accessions</i> | <i>Cases</i> | <i>Mean</i> | <i>Homogeneous groups</i> |
|-------------------|--------------|-------------|---------------------------|
| Can-Ogen2Is       | 3            | 750.0       | X                         |
| In-CGBUSA         | 3            | 750.0       | X                         |
| In-TeNinvSp2      | 2            | 750.0       | X                         |
| Con-BaishChi      | 3            | 750.0       | X                         |
| In-TDewUSA        | 3            | 750.0       | X                         |
| Con-GMJJa         | 3            | 750.0       | X                         |

|                |   |         |    |
|----------------|---|---------|----|
| Can-VedFran    | 3 | 750.0   | X  |
| Tibish-Ksud    | 3 | 750.0   | X  |
| Ac-SRKSLan     | 3 | 750.0   | X  |
| La-OgenBul     | 3 | 750.0   | X  |
| In-PsPiñSp     | 3 | 750.0   | X  |
| Can-PGRFran    | 3 | 750.0   | X  |
| La-KroFran     | 4 | 750.0   | X  |
| In-TeNinvSp    | 2 | 750.0   | X  |
| Mom-MR1Ind     | 3 | 750.0   | X  |
| Ac-TGR1551Zimb | 3 | 750.0   | X  |
| Am-AnaFran     | 3 | 750.0   | X  |
| Can-EfJa       | 3 | 750.0   | X  |
| Can-GCHUSA     | 3 | 750.0   | X  |
| Am-HassanTur   | 3 | 750.0   | X  |
| Am-KafEgy      | 2 | 750.0   | X  |
| Can-NCFran     | 2 | 750.0   | X  |
| Can-NOFran     | 2 | 750.0   | X  |
| Am-KizilUzbe   | 3 | 750.0   | X  |
| In-HoneyDewUSA | 3 | 750.0   | X  |
| In-RoMoch1Sp   | 3 | 750.0   | X  |
| Chi-VellInd    | 3 | 750.0   | X  |
| Ac-SV1Ind      | 2 | 750.0   | X  |
| Ag-TendSud     | 3 | 750.0   | X  |
| La-ErizoSp     | 3 | 750.0   | X  |
| Am-korcaRus    | 3 | 750.0   | X  |
| Con-FreeCJa    | 3 | 750.0   | X  |
| Can-DulUSA     | 3 | 750.0   | X  |
| Ag-WChInd      | 3 | 750.0   | X  |
| Can-EanaHun    | 3 | 750.0   | X  |
| Con-MielChi    | 3 | 750.0   | X  |
| Con-NanChi     | 3 | 750.0   | X  |
| Con-PauPol     | 3 | 750.0   | X  |
| Con-SCKo       | 3 | 750.0   | X  |
| Con-ShiroJa    | 3 | 750.0   | X  |
| Can-GyFran     | 2 | 750.0   | X  |
| Dud-QPMAfg     | 3 | 750.0   | X  |
| Flex-AryaInd   | 3 | 750.0   | X  |
| Flex-Co20Ind   | 3 | 750.0   | X  |
| Flex-SnakeSA   | 3 | 750.0   | X  |
| In-AmAoroSp    | 2 | 750.0   | X  |
| In-AmCañSp     | 3 | 750.0   | X  |
| In-BBescrSp    | 3 | 750.0   | X  |
| La-ZatIta      | 3 | 1304.0  | XX |
| Am-NesviGeor   | 3 | 1308.67 | XX |
| Can-PearlJa    | 3 | 1328.33 | XX |
| In-LaBolasSp   | 3 | 1362.33 | XX |
| Ag-CallInd     | 3 | 1700.67 | XX |
| In-TeSp        | 3 | 1714.33 | XX |
| In-ComunSp     | 2 | 1746.0  | XX |
| In-CrabPor     | 2 | 2035.5  | XX |
| In-BBredSp     | 3 | 2346.33 | XX |
| Am-YokIs       | 2 | 2401.5  | XX |
| Am-TokTaj      | 3 | 2995.33 | XX |
| Ac-G22843Se    | 3 | 3331.67 | XX |
| Can-WiUSA      | 3 | 3570.0  | XX |
| Can-HBJUSA     | 3 | 3766.33 | XX |
| In-LaEscrSp    | 2 | 3843.0  | XX |

|               |   |         |     |
|---------------|---|---------|-----|
| Can-TopUSA    | 3 | 3960.0  | XX  |
| Mom-PII24Ind  | 3 | 4023.67 | XX  |
| Can-SucrFran  | 3 | 4175.67 | XX  |
| Can-SemUSA    | 2 | 5424.5  | X   |
| chate-CarIta  | 1 | 5716.0  | XXX |
| Mom-KhaInd    | 3 | 10909.0 | XX  |
| Dud-QAPMGeorg | 3 | 11528.0 | XX  |
| La-CascaPor   | 2 | 15208.5 | X   |
| Ag-15591Gha   | 3 | 110769. | X   |

#### LSD analysis for SC.7 per accessions

Method: 95.0 percentage LSD

| <i>accessions</i> | <i>Cases</i> | <i>Mean</i> | <i>Homogeneous groups</i> |
|-------------------|--------------|-------------|---------------------------|
| In-CrabPor        | 2            | 750.0       | X                         |
| In-RoMoch1Sp      | 3            | 750.0       | X                         |
| In-LaEscrSp       | 2            | 750.0       | X                         |
| Can-DulUSA        | 3            | 750.0       | X                         |
| Ac-SVIInd         | 2            | 750.0       | X                         |
| In-ComunSp        | 2            | 750.0       | X                         |
| In-TeNinvSp2      | 2            | 750.0       | X                         |
| La-CascaPor       | 2            | 750.0       | X                         |
| In-PsPiñSp        | 3            | 750.0       | X                         |
| Tibish-Ksud       | 3            | 750.0       | X                         |
| In-HoneyDewUSA    | 3            | 750.0       | X                         |
| In-AmAoroSp       | 2            | 750.0       | X                         |
| Can-TopUSA        | 3            | 750.0       | X                         |
| In-AmCañSp        | 3            | 750.0       | X                         |
| Ac-TGR1551Zimb    | 3            | 750.0       | X                         |
| Am-korcaRus       | 3            | 750.0       | X                         |
| Can-SucrFran      | 3            | 750.0       | X                         |
| Mom-PII24Ind      | 3            | 750.0       | X                         |
| Ac-SRKSLan        | 3            | 750.0       | X                         |
| Con-SCKo          | 3            | 750.0       | X                         |
| Con-ShiroJa       | 3            | 750.0       | X                         |
| Flex-SnakeSA      | 3            | 750.0       | X                         |
| In-BBescrSp       | 3            | 1655.0      | X                         |
| Can-WiUSA         | 3            | 1669.33     | X                         |
| Can-SemUSA        | 2            | 2288.5      | X                         |
| Ac-G22843Se       | 3            | 2530.33     | X                         |
| La-KroFran        | 4            | 2564.75     | X                         |
| Can-EfJa          | 3            | 2815.67     | X                         |
| Am-AnaFran        | 3            | 2818.0      | X                         |
| Flex-Co20Ind      | 3            | 2842.67     | X                         |
| Can-HBJUSA        | 3            | 3057.0      | X                         |
| Can-GCHUSA        | 3            | 3487.67     | X                         |
| Con-BaishChi      | 3            | 3490.0      | X                         |
| In-CGBUSA         | 3            | 4020.67     | X                         |
| Con-FreeCJa       | 3            | 4558.33     | X                         |
| La-ErizoSp        | 3            | 4567.33     | X                         |
| La-ZatIta         | 3            | 4733.33     | X                         |
| Ag-15591Gha       | 3            | 4841.0      | X                         |
| Flex-AryaInd      | 3            | 5049.0      | X                         |
| Am-HassanTur      | 3            | 5398.33     | X                         |
| Am-KafEgy         | 2            | 5597.0      | XX                        |
| Dud-QPMAfg        | 3            | 5602.0      | X                         |
| Mom-MR1Ind        | 3            | 5639.0      | X                         |

|               |   |         |     |
|---------------|---|---------|-----|
| Can-GyFran    | 2 | 5683.5  | XX  |
| Ag-WChInd     | 3 | 6057.33 | X   |
| In-TDewUSA    | 3 | 6223.33 | X   |
| Can-PearlJa   | 3 | 7291.0  | X   |
| chate-CarIta  | 1 | 7845.0  | XX  |
| Mom-KhaInd    | 3 | 7992.67 | X   |
| Am-TokTaj     | 3 | 8253.67 | X   |
| Am-KizilUzbe  | 3 | 8273.67 | X   |
| Am-YokIs      | 2 | 11335.5 | XX  |
| Dud-QAPMGeorg | 3 | 12446.3 | XX  |
| Con-GMJJa     | 3 | 13138.7 | XX  |
| In-LaBolasSp  | 3 | 14757.0 | XX  |
| Chi-VellInd   | 3 | 15043.3 | XX  |
| Can-VedFran   | 3 | 15895.7 | XX  |
| Con-NanChi    | 3 | 18193.7 | XX  |
| Can-EanaHun   | 3 | 21041.3 | XX  |
| In-TeNinvSp   | 2 | 22437.0 | XX  |
| Ag-TendSud    | 3 | 23223.0 | XX  |
| Am-NesviGeor  | 3 | 23839.3 | XX  |
| In-TeSp       | 3 | 26459.3 | XX  |
| In-BBredSp    | 3 | 33755.7 | XX  |
| Con-PauPol    | 3 | 35008.7 | XX  |
| La-OgenBul    | 3 | 36701.0 | XX  |
| Can-NOFran    | 2 | 40080.0 | XXX |
| Can-Ogen2Is   | 3 | 67795.7 | XXX |
| Ag-CallInd    | 3 | 92472.7 | XX  |
| Con-MielChi   | 3 | 116037. | X   |
| Can-PGRFran   | 3 | 116128. | X   |
| Can-NCFran    | 2 | 129667. | X   |

#### LSD analysis for U.1 per accessions

Method: 95.0 percentage LSD

| <i>accessions</i> | <i>Cases</i> | <i>Mean</i> | <i>Homogeneous groups</i> |
|-------------------|--------------|-------------|---------------------------|
| Can-NOFran        | 2            | 750.0       | XX                        |
| Mom-PII24Ind      | 3            | 750.0       | X                         |
| Ag-TendSud        | 3            | 750.0       | X                         |
| Am-YokIs          | 2            | 750.0       | XX                        |
| Can-GCHUSA        | 3            | 750.0       | X                         |
| La-CascaPor       | 2            | 750.0       | XX                        |
| Dud-QAPMGeorg     | 3            | 750.0       | X                         |
| Mom-MR1Ind        | 3            | 764.333     | X                         |
| In-AmCañSp        | 3            | 1892.67     | X                         |
| La-ZatIta         | 3            | 1905.0      | X                         |
| In-TeSp           | 3            | 2288.0      | X                         |
| Can-PearlJa       | 3            | 2444.67     | X                         |
| Con-ShiroJa       | 3            | 2462.33     | X                         |
| Am-KafEgy         | 2            | 2550.0      | XX                        |
| Dud-QPMAfg        | 3            | 2879.67     | X                         |
| Con-SCKo          | 3            | 3368.0      | X                         |
| La-OgenBul        | 3            | 3369.0      | X                         |
| Mom-KhaInd        | 3            | 3635.67     | X                         |
| Am-NesviGeor      | 3            | 3652.0      | X                         |
| Flex-Co20Ind      | 3            | 4088.33     | X                         |
| Con-PauPol        | 3            | 4236.0      | X                         |
| Am-TokTaj         | 3            | 4507.67     | X                         |
| Can-SucrFran      | 3            | 4576.33     | X                         |

|                |   |           |      |
|----------------|---|-----------|------|
| In-TDewUSA     | 3 | 4860.67   | X    |
| In-HoneyDewUSA | 3 | 5096.67   | X    |
| In-ComunSp     | 2 | 5421.0    | XX   |
| In-LaEscrSp    | 2 | 5775.0    | XX   |
| La-ErizoSp     | 3 | 6451.33   | X    |
| Can-EanaHun    | 3 | 6706.33   | X    |
| In-RoMoch1Sp   | 3 | 6905.67   | X    |
| Can-NCFran     | 2 | 7437.5    | XX   |
| In-BBescrSp    | 3 | 8601.67   | X    |
| Am-HassanTur   | 3 | 8748.67   | X    |
| Ag-WChInd      | 3 | 8756.0    | X    |
| Flex-AryaInd   | 3 | 9543.0    | X    |
| In-CrabPor     | 2 | 9725.5    | XX   |
| Can-VedFran    | 3 | 9970.0    | X    |
| In-TeNinvSp2   | 2 | 10743.0   | XX   |
| In-LaBolasSp   | 3 | 10978.0   | X    |
| La-KroFran     | 4 | 11466.3   | X    |
| In-AmAoroSp    | 2 | 11630.5   | XX   |
| Flex-SnakeSA   | 3 | 11924.3   | X    |
| Ac-G22843Se    | 3 | 12585.0   | X    |
| In-TeNinvSp    | 2 | 12832.5   | XX   |
| Can-PGRFran    | 3 | 13351.0   | X    |
| Ac-TGR1551Zimb | 3 | 13852.3   | X    |
| Con-BaishChi   | 3 | 14247.0   | X    |
| Con-FreeCJa    | 3 | 14512.3   | X    |
| Can-Ogen2Is    | 3 | 15848.7   | X    |
| Con-MielChi    | 3 | 16282.3   | X    |
| Can-EfJa       | 3 | 17996.7   | X    |
| chate-Carlta   | 1 | 21161.0   | XXX  |
| Ag-CallInd     | 3 | 21236.3   | X    |
| Can-TopUSA     | 3 | 26113.0   | X    |
| Ac-SRKSLan     | 3 | 45279.0   | X    |
| Am-KizilUzbe   | 3 | 45900.0   | X    |
| Am-korcaRus    | 3 | 71813.7   | X    |
| Tibish-Ksud    | 3 | 77012.3   | X    |
| Chi-VellInd    | 3 | 82871.7   | X    |
| Con-GMJJa      | 3 | 88046.7   | X    |
| In-PsPiñSp     | 3 | 94369.7   | X    |
| Am-AnaFran     | 3 | 125959.   | XX   |
| Con-NanChi     | 3 | 155762.   | XX   |
| Can-DulUSA     | 3 | 170310.   | XX   |
| Can-HBJUSA     | 3 | 185506.   | XX   |
| In-BBredSp     | 3 | 267955.   | XX   |
| Can-GyFran     | 2 | 1.40145E6 | XXXX |
| In-CGBUSA      | 3 | 1.49336E6 | XXX  |
| Ag-15591Gha    | 3 | 1.9415E6  | XX   |
| Can-WiUSA      | 3 | 1.96756E6 | XX   |
| Can-SemUSA     | 2 | 2.94991E6 | X    |
| Ac-SVIInd      | 2 | 2.95045E6 | X    |

#### LSD analysis for U.2 per accessions

Method: 95.0 percentage LSD

| <i>accessions</i> | <i>Cases</i> | <i>Mean</i> | <i>Homogeneous groups</i> |
|-------------------|--------------|-------------|---------------------------|
| Ag-WChInd         | 3            | 750.0       | X                         |
| Dud-QPMAfg        | 3            | 750.0       | X                         |
| Mom-MR1Ind        | 3            | 750.0       | X                         |

|                |   |         |     |
|----------------|---|---------|-----|
| Ac-G22843Se    | 3 | 750.0   | X   |
| Can-NCFran     | 2 | 750.0   | XX  |
| In-TDewUSA     | 3 | 750.0   | X   |
| Ag-15591Gha    | 3 | 750.0   | X   |
| In-HoneyDewUSA | 3 | 750.0   | X   |
| Con-ShiroJa    | 3 | 750.0   | X   |
| Flex-Co20Ind   | 3 | 750.0   | X   |
| In-CrabPor     | 2 | 750.0   | XX  |
| In-AmAoroSp    | 2 | 750.0   | XX  |
| In-PsPiñSp     | 3 | 750.0   | X   |
| In-TeNinvSp2   | 2 | 750.0   | XX  |
| In-LaEscrSp    | 2 | 750.0   | XX  |
| In-LaBolasSp   | 3 | 750.0   | X   |
| Con-SCKo       | 3 | 750.0   | X   |
| Ac-TGR1551Zimb | 3 | 750.0   | X   |
| chate-CarIta   | 1 | 750.0   | XXX |
| Can-WiUSA      | 3 | 750.0   | X   |
| In-BBredSp     | 3 | 750.0   | X   |
| In-ComunSp     | 2 | 750.0   | XX  |
| In-CGBUSA      | 3 | 750.0   | X   |
| Am-KizilUzbe   | 3 | 750.0   | X   |
| Ac-SVIInd      | 2 | 750.0   | XX  |
| Tibish-Ksud    | 3 | 750.0   | X   |
| Ag-TendSud     | 3 | 750.0   | X   |
| Ac-SRKSLan     | 3 | 750.0   | X   |
| Can-TopUSA     | 3 | 750.0   | X   |
| Con-BaishChi   | 3 | 750.0   | X   |
| Con-FreeCJa    | 3 | 750.0   | X   |
| Am-YokIs       | 2 | 750.0   | XX  |
| In-TeNinvSp    | 2 | 750.0   | XX  |
| Con-NanChi     | 3 | 752.667 | X   |
| Con-MielChi    | 3 | 753.333 | X   |
| Dud-QAPMGeorg  | 3 | 755.333 | X   |
| Con-GMJJa      | 3 | 756.667 | X   |
| Can-DulUSA     | 3 | 759.0   | X   |
| Flex-AryaInd   | 3 | 765.333 | X   |
| Con-PauPol     | 3 | 765.333 | X   |
| Flex-SnakeSA   | 3 | 768.0   | X   |
| In-RoMoch1Sp   | 3 | 781.0   | X   |
| Can-PearlJa    | 3 | 785.0   | X   |
| Can-HBJUSA     | 3 | 817.0   | X   |
| Can-Ogen2Is    | 3 | 838.0   | X   |
| In-AmCañSp     | 3 | 2469.67 | XX  |
| In-BBescrSp    | 3 | 2473.67 | XX  |
| La-OgenBul     | 3 | 2966.33 | XX  |
| Am-KafEgy      | 2 | 3494.5  | XX  |
| Ag-CallInd     | 3 | 3836.67 | XX  |
| Chi-VellInd    | 3 | 4451.33 | XX  |
| Am-TokTaj      | 3 | 4826.67 | XX  |
| Mom-PII24Ind   | 3 | 5214.67 | XX  |
| La-ErizoSp     | 3 | 5324.67 | XX  |
| Am-HassanTur   | 3 | 5702.67 | XX  |
| In-TeSp        | 3 | 7774.33 | XX  |
| Can-SemUSA     | 2 | 11080.0 | XXX |
| Can-EanaHun    | 3 | 14860.7 | XXX |
| La-ZatIta      | 3 | 15452.7 | XXX |
| Can-VedFran    | 3 | 16316.7 | XXX |



|              |   |         |      |
|--------------|---|---------|------|
| Can-EfJa     | 3 | 19991.3 | XXX  |
| Can-GyFran   | 2 | 21587.0 | XXXX |
| Can-PGRFran  | 3 | 23781.3 | XXXX |
| Am-korcaRus  | 3 | 26863.0 | XXXX |
| Am-NesviGeor | 3 | 27651.0 | XXXX |
| La-CascaPor  | 2 | 33793.5 | XXXX |
| Can-SucrFran | 3 | 34932.3 | XXX  |
| La-KroFran   | 4 | 41625.8 | XX   |
| Mom-KhaInd   | 3 | 56070.0 | X    |
| Can-GCHUSA   | 3 | 57436.3 | X    |
| Am-AnaFran   | 3 | 103299. | X    |
| Can-NOFran   | 2 | 123589. | X    |

### LSD analysis for U.3 per accessions

Method: 95.0 percentage LSD

| <i>accessions</i> | <i>Cases</i> | <i>Mean</i> | <i>Homogeneous groups</i> |
|-------------------|--------------|-------------|---------------------------|
| In-RoMoch1Sp      | 3            | 782.667     | X                         |
| Ag-TendSud        | 3            | 848.333     | X                         |
| Con-ShiroJa       | 3            | 876.333     | X                         |
| Can-PearlJa       | 3            | 889.0       | X                         |
| Ac-TGR1551Zimb    | 3            | 907.0       | X                         |
| Ac-SVIInd         | 2            | 928.5       | X                         |
| Tibish-Ksud       | 3            | 929.333     | X                         |
| Chi-VellInd       | 3            | 934.667     | X                         |
| In-PsPiñSp        | 3            | 976.333     | X                         |
| chate-Carlta      | 1            | 992.0       | XX                        |
| In-CGBUSA         | 3            | 1008.67     | X                         |
| Con-FreeCJa       | 3            | 1036.33     | X                         |
| In-BBescrSp       | 3            | 1044.0      | X                         |
| Can-PGRFran       | 3            | 1063.33     | X                         |
| Ac-SRKSLan        | 3            | 1075.67     | X                         |
| Can-VedFran       | 3            | 1091.33     | X                         |
| In-CrabPor        | 2            | 1105.5      | X                         |
| In-HoneyDewUSA    | 3            | 1110.33     | X                         |
| Flex-Co20Ind      | 3            | 1115.33     | X                         |
| Dud-QAPMGeorg     | 3            | 1151.67     | X                         |
| Mom-KhaInd        | 3            | 1161.33     | X                         |
| Con-GMJJa         | 3            | 1172.0      | X                         |
| In-TDewUSA        | 3            | 1174.67     | X                         |
| Con-NanChi        | 3            | 1250.67     | X                         |
| Ag-WChInd         | 3            | 1252.67     | X                         |
| In-ComunSp        | 2            | 1260.0      | X                         |
| In-AmAoroSp       | 2            | 1263.0      | X                         |
| Con-BaishChi      | 3            | 1264.0      | X                         |
| La-KroFran        | 4            | 1265.25     | X                         |
| In-LaBolasSp      | 3            | 1272.0      | X                         |
| Flex-AryaInd      | 3            | 1272.33     | X                         |
| Can-EanaHun       | 3            | 1314.33     | X                         |
| In-AmCañSp        | 3            | 1344.67     | X                         |
| Am-korcaRus       | 3            | 1412.33     | X                         |
| Am-TokTaj         | 3            | 1429.0      | X                         |
| Am-YokIs          | 2            | 1456.5      | XX                        |
| Am-NesviGeor      | 3            | 1477.0      | X                         |
| Am-KizilUzbe      | 3            | 1477.33     | X                         |
| Con-MielChi       | 3            | 1479.33     | X                         |
| Can-SemUSA        | 2            | 1482.5      | XX                        |

|              |   |         |     |
|--------------|---|---------|-----|
| Am-KafEgy    | 2 | 1502.0  | XX  |
| Dud-QPMAfg   | 3 | 1504.0  | X   |
| In-BBredSp   | 3 | 1569.67 | X   |
| Ac-G22843Se  | 3 | 1570.0  | X   |
| In-TeSp      | 3 | 1626.67 | X   |
| Can-SucrFran | 3 | 1656.0  | XX  |
| In-TeNinvSp  | 2 | 1658.0  | XX  |
| Con-SCKo     | 3 | 1675.0  | XX  |
| Can-NCFran   | 2 | 1693.5  | XX  |
| Mom-PII24Ind | 3 | 1719.0  | XX  |
| Flex-SnakeSA | 3 | 1760.0  | XX  |
| La-ErizoSp   | 3 | 1830.67 | XX  |
| La-OgenBul   | 3 | 1835.67 | XX  |
| Mom-MR1Ind   | 3 | 1848.0  | XX  |
| Can-Ogen2Is  | 3 | 1884.33 | XX  |
| Can-EfJa     | 3 | 1927.67 | XX  |
| Can-DulUSA   | 3 | 1939.0  | XX  |
| Can-TopUSA   | 3 | 1954.33 | XX  |
| Can-HBJUSA   | 3 | 2017.67 | XX  |
| Ag-15591Gha  | 3 | 2137.67 | XX  |
| Ag-CallInd   | 3 | 2144.33 | XX  |
| In-LaEscrSp  | 2 | 2209.0  | XX  |
| In-TeNinvSp2 | 2 | 2351.5  | XX  |
| Can-WiUSA    | 3 | 2441.33 | XX  |
| Con-PauPol   | 3 | 2665.0  | XX  |
| La-CascaPor  | 2 | 2888.0  | XX  |
| Am-AnaFran   | 3 | 3012.67 | XX  |
| Can-GCHUSA   | 3 | 3207.0  | XX  |
| Can-GyFran   | 2 | 3780.0  | XXX |
| La-Zatlta    | 3 | 4354.67 | XX  |
| Am-HassanTur | 3 | 6563.33 | XX  |
| Can-NOFran   | 2 | 8903.0  | X   |

#### LSD analysis for U.4 per accessions

Method: 95.0 percentage LSD

| <i>accessions</i> | <i>Cases</i> | <i>Mean</i> | <i>Homogeneous groups</i> |
|-------------------|--------------|-------------|---------------------------|
| Con-NanChi        | 3            | 750.0       | X                         |
| In-TeNinvSp       | 2            | 750.0       | X                         |
| Con-ShiroJa       | 3            | 750.0       | X                         |
| In-PsPiñSp        | 3            | 750.0       | X                         |
| Con-GMJJa         | 3            | 750.0       | X                         |
| Mom-PII24Ind      | 3            | 750.0       | X                         |
| Dud-QAPMGeorg     | 3            | 750.0       | X                         |
| In-TDewUSA        | 3            | 750.0       | X                         |
| Flex-AryaInd      | 3            | 750.0       | X                         |
| In-CGBUSA         | 3            | 750.0       | X                         |
| Am-TokTaj         | 3            | 750.0       | X                         |
| Con-MielChi       | 3            | 750.0       | X                         |
| Con-SCKo          | 3            | 750.0       | X                         |
| Con-PauPol        | 3            | 750.0       | X                         |
| In-BBescrSp       | 3            | 750.0       | X                         |
| Ag-CallInd        | 3            | 750.0       | X                         |
| Tibish-Ksud       | 3            | 750.0       | X                         |
| La-ErizoSp        | 3            | 750.0       | X                         |
| Ag-15591Gha       | 3            | 750.0       | X                         |
| In-AmAoroSp       | 2            | 750.0       | X                         |

|                |   |         |         |
|----------------|---|---------|---------|
| In-TeNinvSp2   | 2 | 750.0   | X       |
| chate-Carlta   | 1 | 750.0   | XXX     |
| Ac-TGR1551Zimb | 3 | 750.0   | X       |
| Am-KizilUzbe   | 3 | 750.0   | X       |
| Flex-SnakeSA   | 3 | 750.0   | X       |
| In-LaBolasSp   | 3 | 750.0   | X       |
| Ac-SVIIInd     | 2 | 750.0   | X       |
| In-BBredSp     | 3 | 750.0   | X       |
| Can-SemUSA     | 2 | 750.0   | X       |
| Ac-SRKSLan     | 3 | 750.0   | X       |
| In-HoneyDewUSA | 3 | 750.0   | X       |
| La-OgenBul     | 3 | 750.0   | X       |
| Ag-TendSud     | 3 | 753.333 | X       |
| Can-PearlJa    | 3 | 796.0   | X       |
| Chi-VellInd    | 3 | 991.333 | X       |
| In-RoMoch1Sp   | 3 | 1117.0  | X       |
| Con-BaishChi   | 3 | 1363.33 | X       |
| Ag-WChInd      | 3 | 1466.0  | X       |
| In-CrabPor     | 2 | 1611.5  | X       |
| La-KroFran     | 4 | 1618.75 | X       |
| Dud-QPMAfg     | 3 | 1721.0  | X       |
| Am-HassanTur   | 3 | 1733.0  | X       |
| Flex-Co20Ind   | 3 | 1836.67 | X       |
| Can-PGRFran    | 3 | 1890.67 | X       |
| Ac-G22843Se    | 3 | 2017.67 | X       |
| Am-korcaRus    | 3 | 2136.33 | X       |
| Con-FreeCJa    | 3 | 2272.33 | X       |
| Can-HBJUSA     | 3 | 2587.0  | X       |
| In-AmCañSp     | 3 | 2802.67 | X       |
| Can-NCFran     | 2 | 2997.0  | XX      |
| In-LaEscrSp    | 2 | 3199.5  | XX      |
| Can-EanaHun    | 3 | 3660.67 | X       |
| Can-GCHUSA     | 3 | 4271.0  | XX      |
| Am-KafEgy      | 2 | 6154.0  | XXX     |
| In-ComunSp     | 2 | 7593.5  | XXXX    |
| Mom-KhaInd     | 3 | 7678.33 | XXX     |
| Am-NesviGeor   | 3 | 7995.67 | XXX     |
| Can-EfJa       | 3 | 8937.0  | XXX     |
| Can-WiUSA      | 3 | 10682.7 | XXXX    |
| In-TeSp        | 3 | 11025.7 | XXXX    |
| Am-AnaFran     | 3 | 13661.0 | XXXX    |
| Can-DulUSA     | 3 | 13741.3 | XXXX    |
| Mom-MR1Ind     | 3 | 15733.0 | XXXXXX  |
| Can-NOFran     | 2 | 23381.0 | XXXXXXX |
| Can-GyFran     | 2 | 28374.0 | XXXXXXX |
| Can-Ogen2Is    | 3 | 29176.3 | XXXXX   |
| Am-YokIs       | 2 | 33390.5 | XXXX    |
| Can-VedFran    | 3 | 36308.0 | XXX     |
| Can-TopUSA     | 3 | 40011.7 | XX      |
| Can-SucrFran   | 3 | 47918.3 | X       |
| La-ZatIta      | 3 | 95223.3 | X       |
| La-CascaPor    | 2 | 206481. | X       |

#### LSD analysis for U.5 per accessions

Method: 95.0 percentage LSD

| <i>accessions</i> | <i>Cases</i> | <i>Mean</i> | <i>Homogeneous groups</i> |
|-------------------|--------------|-------------|---------------------------|
|-------------------|--------------|-------------|---------------------------|

|                |   |           |          |
|----------------|---|-----------|----------|
| Ag-15591Gha    | 3 | 750.0     | X        |
| Tibish-Ksud    | 3 | 750.0     | X        |
| In-PsPiñSp     | 3 | 750.0     | X        |
| chate-Carlta   | 1 | 750.0     | XXXX     |
| In-CGBUSA      | 3 | 750.0     | X        |
| In-RoMoch1Sp   | 3 | 750.0     | X        |
| Ac-SVIIInd     | 2 | 750.0     | XX       |
| Ac-SRKSLan     | 3 | 750.0     | X        |
| In-AmAoroSp    | 2 | 750.0     | XX       |
| Ag-TendSud     | 3 | 858.333   | X        |
| Ac-TGR1551Zimb | 3 | 1528.33   | X        |
| Con-FreeCJa    | 3 | 2350.67   | X        |
| In-HoneyDewUSA | 3 | 3565.67   | X        |
| Flex-Co20Ind   | 3 | 3632.0    | X        |
| Flex-SnakeSA   | 3 | 4771.33   | X        |
| In-CrabPor     | 2 | 6391.5    | XX       |
| Chi-VellInd    | 3 | 17927.0   | X        |
| Mom-KhaInd     | 3 | 20828.3   | X        |
| Can-NCFran     | 2 | 30680.5   | XX       |
| Ag-WChInd      | 3 | 40061.3   | X        |
| Ac-G22843Se    | 3 | 41225.7   | XX       |
| In-LaEscrSp    | 2 | 51519.0   | XX       |
| Am-TokTaj      | 3 | 68993.0   | XX       |
| In-BBredSp     | 3 | 76009.3   | XX       |
| Am-HassanTur   | 3 | 81030.7   | XX       |
| Con-PauPol     | 3 | 89837.3   | XX       |
| Con-ShiroJa    | 3 | 96974.7   | XX       |
| Con-MielChi    | 3 | 98076.0   | XX       |
| In-TeNinvSp    | 2 | 98528.5   | XX       |
| In-BBescrSp    | 3 | 105517.   | XX       |
| Con-GMJJa      | 3 | 113949.   | XX       |
| Can-SucrFran   | 3 | 115184.   | XX       |
| Ag-CallInd     | 3 | 130043.   | XX       |
| Can-EanaHun    | 3 | 156003.   | XX       |
| Can-WiUSA      | 3 | 161746.   | XX       |
| Dud-QPMAfg     | 3 | 179477.   | XX       |
| Am-KizilUzbe   | 3 | 212810.   | XX       |
| In-TDewUSA     | 3 | 250164.   | XX       |
| Flex-AryaInd   | 3 | 264920.   | XX       |
| La-CascaPor    | 2 | 276972.   | XXX      |
| Con-NanChi     | 3 | 281298.   | XX       |
| Can-GyFran     | 2 | 317662.   | XXXX     |
| La-Zatlta      | 3 | 337927.   | XX       |
| In-AmCañSp     | 3 | 350849.   | XX       |
| Mom-PII24Ind   | 3 | 401083.   | XX       |
| Con-BaishChi   | 3 | 430844.   | XXX      |
| Can-HBJUSA     | 3 | 482140.   | XXXX     |
| Am-KafEgy      | 2 | 497086.   | XXXXX    |
| Con-SCKo       | 3 | 542672.   | XXXX     |
| Can-PGRFran    | 3 | 592052.   | XXXX     |
| Mom-MRIInd     | 3 | 621922.   | XXXX     |
| Am-korcaRus    | 3 | 622783.   | XXXX     |
| Can-PearlJa    | 3 | 745907.   | XXXXXX   |
| Can-SemUSA     | 2 | 810503.   | XXXXXX   |
| In-ComunSp     | 2 | 987770.   | XXXXXXXX |
| Am-NesviGeor   | 3 | 1.02726E6 | XXXXXX   |
| In-LaBolasSp   | 3 | 1.03926E6 | XXXXXX   |

|               |   |           |          |
|---------------|---|-----------|----------|
| La-ErizoSp    | 3 | 1.13338E6 | XXXXXXX  |
| Can-DulUSA    | 3 | 1.15473E6 | XXXXXXX  |
| La-KroFran    | 4 | 1.17328E6 | XXXXXXX  |
| Can-VedFran   | 3 | 1.1948E6  | XXXXXXXX |
| Can-TopUSA    | 3 | 1.61654E6 | XXXXXXXX |
| Can-EfJa      | 3 | 1.66813E6 | XXXXXXX  |
| In-TeSp       | 3 | 1.84983E6 | XXXXXX   |
| Can-NOFran    | 2 | 2.08327E6 | XXXXX    |
| Can-Ogen2Is   | 3 | 2.25413E6 | XXXXX    |
| Am-AnaFran    | 3 | 2.37655E6 | XXX      |
| Dud-QAPMGeorg | 3 | 2.5922E6  | XX       |
| In-TeNinvSp2  | 2 | 3.58883E6 | XX       |
| La-OgenBul    | 3 | 4.05976E6 | X        |
| Can-GCHUSA    | 3 | 4.26822E6 | X        |
| Am-YokIs      | 2 | 5.86833E6 | X        |

#### LSD analysis for U.6 per accessions

Method: 95.0 percentage LSD

| <i>accessions</i> | <i>Cases</i> | <i>Mean</i> | <i>Homogeneous groups</i> |
|-------------------|--------------|-------------|---------------------------|
| Am-KizilUzbe      | 3            | 26875.3     | X                         |
| Can-DulUSA        | 3            | 27008.3     | X                         |
| Am-AnaFran        | 3            | 27525.0     | X                         |
| Can-TopUSA        | 3            | 28557.3     | XX                        |
| chate-CarIta      | 1            | 29438.0     | XX                        |
| Mom-PII 24Ind     | 3            | 29749.3     | XX                        |
| Am-TokTaj         | 3            | 30056.0     | XX                        |
| In-CrabPor        | 2            | 30964.0     | XX                        |
| In-TeNinvSp2      | 2            | 33147.5     | XX                        |
| La-CascaPor       | 2            | 34042.0     | XX                        |
| In-RoMoch1Sp      | 3            | 36290.0     | XX                        |
| Can-SucrFran      | 3            | 36807.7     | XX                        |
| Chi-VellInd       | 3            | 36993.0     | XX                        |
| Con-SCKo          | 3            | 37302.0     | XX                        |
| In-ComunSp        | 2            | 37811.0     | XX                        |
| In-TeSp           | 3            | 37960.7     | XX                        |
| Con-GMJJa         | 3            | 38697.3     | XX                        |
| Mom-KhaInd        | 3            | 40459.0     | XX                        |
| Con-BaishChi      | 3            | 41385.7     | XX                        |
| La-KroFran        | 4            | 41809.0     | XX                        |
| Can-EanaHun       | 3            | 42645.3     | XX                        |
| Can-EfJa          | 3            | 42726.0     | XX                        |
| Am-HassanTur      | 3            | 43243.3     | XX                        |
| Ac-G22843Se       | 3            | 43534.7     | XX                        |
| Can-PGRFran       | 3            | 44913.7     | XX                        |
| In-BBredSp        | 3            | 47104.7     | XX                        |
| In-CGBUSA         | 3            | 47319.7     | XX                        |
| Can-GyFran        | 2            | 48167.0     | XX                        |
| Can-NOFran        | 2            | 49543.0     | XX                        |
| Flex-AryaInd      | 3            | 50242.0     | XX                        |
| Can-HBJUSA        | 3            | 50327.0     | XX                        |
| Can-SemUSA        | 2            | 50770.0     | XX                        |
| La-ZatIta         | 3            | 54307.0     | XX                        |
| Can-VedFran       | 3            | 54819.0     | XX                        |
| Ag-TendSud        | 3            | 56942.7     | XX                        |
| Con-ShiroJa       | 3            | 58034.7     | XX                        |
| Can-GCHUSA        | 3            | 58253.0     | XX                        |

|                |   |         |    |
|----------------|---|---------|----|
| Can-WiUSA      | 3 | 58878.3 | XX |
| La-OgenBul     | 3 | 59834.0 | XX |
| In-HoneyDewUSA | 3 | 60092.0 | XX |
| Ag-15591Gha    | 3 | 60923.7 | XX |
| Mom-MRIInd     | 3 | 61208.0 | XX |
| Can-Ogen2Is    | 3 | 61797.7 | XX |
| La-ErizoSp     | 3 | 63117.7 | XX |
| Can-PearlJa    | 3 | 65362.7 | XX |
| Dud-QPMafg     | 3 | 65383.0 | XX |
| Am-YokIs       | 2 | 65462.0 | XX |
| Con-MielChi    | 3 | 66136.0 | XX |
| In-LaEscrSp    | 2 | 67585.0 | XX |
| Dud-QAPMGeorg  | 3 | 68584.3 | XX |
| Ag-WChInd      | 3 | 70270.3 | XX |
| Tibish-Ksud    | 3 | 70714.0 | XX |
| In-PsPiñSp     | 3 | 70901.3 | XX |
| Ac-SRKSLan     | 3 | 71810.7 | XX |
| Flex-Co20Ind   | 3 | 72156.0 | XX |
| Am-KafEgy      | 2 | 72365.0 | XX |
| Am-korcaRus    | 3 | 73438.0 | XX |
| Con-NanChi     | 3 | 76028.7 | XX |
| Ag-CallInd     | 3 | 76119.7 | XX |
| Am-NesviGeor   | 3 | 77209.7 | XX |
| In-BBescrSp    | 3 | 77289.7 | XX |
| In-AmAoroSp    | 2 | 77613.0 | XX |
| Con-PauPol     | 3 | 79472.0 | XX |
| In-LaBolasSp   | 3 | 80499.0 | XX |
| Flex-SnakeSA   | 3 | 80817.7 | XX |
| Can-NCFran     | 2 | 83254.5 | XX |
| Con-FreeCJa    | 3 | 85998.3 | XX |
| Ac-TGR1551Zimb | 3 | 86352.7 | XX |
| Ac-SVIIInd     | 2 | 87059.0 | XX |
| In-AmCañSp     | 3 | 90432.0 | XX |
| In-TDewUSA     | 3 | 91306.0 | X  |
| In-TeNinvSp    | 2 | 95889.5 | XX |

#### LSD analysis for U.7 per accessions

Method: 95.0 percentage LSD

| <i>accessions</i> | <i>Cases</i> | <i>Mean</i> | <i>Homogeneous groups</i> |
|-------------------|--------------|-------------|---------------------------|
| In-CrabPor        | 2            | 750.0       | XXXX                      |
| In-AmAoroSp       | 2            | 750.0       | XXXX                      |
| Ac-SRKSLan        | 3            | 750.0       | X                         |
| In-PsPiñSp        | 3            | 750.0       | X                         |
| Ac-SVIIInd        | 2            | 750.0       | XXXX                      |
| In-BBredSp        | 3            | 750.0       | X                         |
| In-CGBUSA         | 3            | 750.0       | X                         |
| Flex-Co20Ind      | 3            | 751.0       | X                         |
| In-RoMoch1Sp      | 3            | 2350.33     | X                         |
| Con-ShiroJa       | 3            | 2391.33     | X                         |
| Con-MielChi       | 3            | 2965.0      | X                         |
| Ac-TGR1551Zimb    | 3            | 3314.0      | X X                       |
| In-HoneyDewUSA    | 3            | 3419.0      | X X                       |
| Tibish-Ksud       | 3            | 4540.33     | X X                       |
| chate-CarIta      | 1            | 4840.0      | XXXXXX                    |
| Flex-SnakeSA      | 3            | 5110.67     | X X                       |
| Con-FreeCJa       | 3            | 5284.0      | X X                       |

|               |   |           |          |
|---------------|---|-----------|----------|
| Can-NCFran    | 2 | 5944.5    | XXXX     |
| Con-GMJJa     | 3 | 6827.0    | X X      |
| Ag-WChInd     | 3 | 7093.33   | X X      |
| Ag-TendSud    | 3 | 7588.0    | X X      |
| Con-BaishChi  | 3 | 9397.67   | X X      |
| Mom-KhaInd    | 3 | 10853.3   | X X      |
| In-LaEscrSp   | 2 | 11727.5   | XXXX     |
| In-TeNinvSp   | 2 | 12347.0   | XXXX     |
| Con-PauPol    | 3 | 17606.3   | X X      |
| Chi-VellInd   | 3 | 18864.3   | X X      |
| Dud-QPMAfg    | 3 | 22768.3   | XXX      |
| In-AmCañSp    | 3 | 23091.3   | XXX      |
| Can-SucrFran  | 3 | 23198.0   | XXX      |
| In-TDewUSA    | 3 | 29799.7   | XXX      |
| Ag-15591Gha   | 3 | 30777.7   | XXX      |
| Can-EanaHun   | 3 | 34247.7   | XXXX     |
| In-BBescrSp   | 3 | 39752.0   | XXXX     |
| Ac-G22843Se   | 3 | 46228.0   | XXXX     |
| La-ZatIta     | 3 | 52126.0   | XXXX     |
| Con-SCKo      | 3 | 53048.0   | XXXX     |
| Con-NanChi    | 3 | 64451.0   | XXXX     |
| Can-WiUSA     | 3 | 68028.7   | XXXX     |
| Can-GyFran    | 2 | 70090.5   | XXXX     |
| Flex-AryaInd  | 3 | 70397.0   | XXXX     |
| La-CascaPor   | 2 | 82278.5   | XXXX     |
| Ag-CallInd    | 3 | 82774.3   | XXXX     |
| Am-KizilUzbe  | 3 | 88959.0   | XXXX     |
| Can-HBJUSA    | 3 | 92919.0   | XXXX     |
| Am-HassanTur  | 3 | 102740.   | XXXX     |
| Am-TokTaj     | 3 | 103723.   | XXXX     |
| Can-Ogen2Is   | 3 | 149893.   | XXXX     |
| Can-TopUSA    | 3 | 162802.   | XXXXX    |
| Dud-QAPMGeorg | 3 | 172415.   | XXXXX    |
| Can-PearlJa   | 3 | 188920.   | XXXXX    |
| Can-PGRFran   | 3 | 192989.   | XXXXX    |
| Mom-PII24Ind  | 3 | 215761.   | XXXXXX   |
| Am-AnaFran    | 3 | 217871.   | XXXXXX   |
| Can-VedFran   | 3 | 227918.   | XXXXXX   |
| Can-SemUSA    | 2 | 242206.   | XXXXXXX  |
| Am-KafEgy     | 2 | 257196.   | XXXXXXX  |
| Mom-MR1Ind    | 3 | 279363.   | XXXXXXX  |
| In-ComunSp    | 2 | 349265.   | XXXXXXXX |
| Am-korcaRus   | 3 | 363413.   | XXXXXXXX |
| La-KroFran    | 4 | 378805.   | X XXXX   |
| Can-DulUSA    | 3 | 385028.   | XXXXXX   |
| In-LaBolasSp  | 3 | 413388.   | XXXX     |
| Can-NOFran    | 2 | 426704.   | XXXXXXXX |
| La-ErizoSp    | 3 | 534499.   | XXXX     |
| Can-EfJa      | 3 | 622074.   | XXX      |
| In-TeNinvSp2  | 2 | 684671.   | XXX      |
| Am-NesviGeor  | 3 | 700825.   | XX       |
| Can-GCHUSA    | 3 | 816136.   | X        |
| La-OgenBul    | 3 | 849412.   | X        |
| Am-YokIs      | 2 | 1.35588E6 | X        |
| In-TeSp       | 3 | 1.38319E6 | X        |

LSD analysis for U.8 per accessions

Method: 95.0 percentage LSD

| <i>accessions</i> | <i>Cases</i> | <i>Mean</i> | <i>Homogeneous groups</i> |
|-------------------|--------------|-------------|---------------------------|
| Can-GyFran        | 2            | 50824.0     | xxx                       |
| Am-AnaFran        | 3            | 60551.3     | x                         |
| Can-DulUSA        | 3            | 60728.7     | x                         |
| Can-EfJa          | 3            | 75404.3     | xx                        |
| Can-SemUSA        | 2            | 77623.0     | xxxxx                     |
| Mom-PII24Ind      | 3            | 78319.0     | xxx                       |
| Am-KizilUzbe      | 3            | 78994.3     | xxx                       |
| Can-TopUSA        | 3            | 83994.0     | xxxxx                     |
| In-CGBUSA         | 3            | 92964.3     | xxxxx                     |
| In-BBredSp        | 3            | 100352.     | xxxxx                     |
| Am-TokTaj         | 3            | 102116.     | xxxxx                     |
| chate-CarIta      | 1            | 106942.     | xxxxxxxxxxx               |
| La-CascaPor       | 2            | 110901.     | xxxxxx x                  |
| In-ComunSp        | 2            | 120690.     | xxxxxxxxxxx               |
| Chi-VellInd       | 3            | 126438.     | xxxxxx                    |
| Con-BaishChi      | 3            | 127315.     | xxxxxx x                  |
| Con-GMJa          | 3            | 128807.     | xxxxxx x                  |
| Con-SCKo          | 3            | 131765.     | xxxxxx x                  |
| In-TeSp           | 3            | 132243.     | xxxxxx x                  |
| Can-HBJUSA        | 3            | 133034.     | xxxxxx x                  |
| In-CrabPor        | 2            | 134690.     | xxxxxxxxxxx               |
| La-ZatIta         | 3            | 143168.     | xxxxxx x                  |
| In-TeNinvSp2      | 2            | 145084.     | xxxxxxxxxxx               |
| In-RoMoch1Sp      | 3            | 146010.     | xxxxxx x                  |
| Can-WiUSA         | 3            | 146910.     | xxxxxx x                  |
| Can-GCHUSA        | 3            | 150775.     | xxxxxxxxxxx               |
| Can-SucrFran      | 3            | 155984.     | xxxxxxxxxxx               |
| Ag-15591Gha       | 3            | 159171.     | xxxxxxxxxxx               |
| La-KroFran        | 4            | 160523.     | xxxxxx x                  |
| Mom-MR1Ind        | 3            | 164140.     | xxxxxxxxxxx               |
| Can-EanaHun       | 3            | 166454.     | xxxxxxxxxxx               |
| Am-HassanTur      | 3            | 170008.     | xxxxxxxxxxx               |
| La-OgenBul        | 3            | 174066.     | xxxxxxxxxxx               |
| Am-YokIs          | 2            | 176730.     | xxxxxxxxxxx               |
| Mom-KhaInd        | 3            | 178288.     | xxxxxxxxxxx               |
| Can-PGRFran       | 3            | 182168.     | xxxxxxxxxxx               |
| Ag-TendSud        | 3            | 186283.     | xxxxxxxxxxx               |
| La-ErizoSp        | 3            | 186321.     | xxxxxxxxxxx               |
| Ac-G22843Se       | 3            | 192567.     | xxxxxxxxxxx               |
| Can-Ogen2Is       | 3            | 194163.     | xxxxxxxxxxx               |
| Flex-Co20Ind      | 3            | 200561.     | xxxxxxxxxxx               |
| Can-NOFran        | 2            | 200924.     | xxxxxxxxxxx               |
| Am-korcaRus       | 3            | 206136.     | xxxxxxxxxxx               |
| Can-VedFran       | 3            | 208443.     | xxxxxxxxxxx               |
| Am-KafEgy         | 2            | 225335.     | xxxxxxxxxxx               |
| Dud-QPMAfg        | 3            | 227962.     | xxxxxxxxxxx               |
| In-LaEscrSp       | 2            | 232415.     | xxxxxxxxxxx               |
| Can-PearlJa       | 3            | 238202.     | xxxxxxxxxxx               |
| Ag-WChInd         | 3            | 238808.     | xxxxxxxxxxx               |
| Am-NesviGeor      | 3            | 239926.     | xxxxxxxxxxx               |
| Dud-QAPMGeorg     | 3            | 240146.     | xxxxxxxxxxx               |
| Con-MielChi       | 3            | 240949.     | xxxxxxxxxxx               |
| Flex-AryaInd      | 3            | 254452.     | xxxxxxxxxxx               |
| Tibish-Ksud       | 3            | 254724.     | xxxxxxxxxxx               |



|                |   |         |            |
|----------------|---|---------|------------|
| Con-ShiroJa    | 3 | 265390. | XXXXXXXXXX |
| Con-NanChi     | 3 | 268636. | XXXXXXXXXX |
| Ac-SRKSLan     | 3 | 272079. | XXXXXXXXXX |
| Flex-SnakeSA   | 3 | 279616. | XXXXXXXXXX |
| In-PsPiñSp     | 3 | 282491. | XXXXXXXXXX |
| In-BBescrSp    | 3 | 282873. | XXXXXXXXXX |
| In-LaBolasSp   | 3 | 298643. | XXXXXXXXXX |
| Ac-SVIIInd     | 2 | 302668. | XXXXXXXXXX |
| Ag-CallInd     | 3 | 313571. | XXXXXXXXXX |
| In-AmAoroSp    | 2 | 317550. | XXXXXXXXXX |
| Con-PauPol     | 3 | 328670. | XXXXXXXXXX |
| In-HoneyDewUSA | 3 | 336087. | XXXXXXX    |
| Can-NCFran     | 2 | 359421. | XXXXXXX    |
| Con-FreeCJa    | 3 | 374904. | XXXXXX     |
| In-TDewUSA     | 3 | 398987. | XX X       |
| Ac-TGR1551Zimb | 3 | 402215. | X X        |
| In-TeNinvSp    | 2 | 410380. | XXXX       |
| In-AmCañSp     | 3 | 424109. | X          |

#### LSD analysis for U.9 per accessions

Method: 95.0 percentage LSD

| <i>accessions</i> | <i>Cases</i> | <i>Mean</i> | <i>Homogeneous groups</i> |
|-------------------|--------------|-------------|---------------------------|
| Ac-SRKSLan        | 3            | 750.0       | X                         |
| Con-ShiroJa       | 3            | 750.0       | X                         |
| In-CGBUSA         | 3            | 750.0       | X                         |
| Con-FreeCJa       | 3            | 750.0       | X                         |
| Ac-SVIIInd        | 2            | 750.0       | X                         |
| Ag-WChInd         | 3            | 750.0       | X                         |
| Ac-TGR1551Zimb    | 3            | 750.0       | X                         |
| In-PsPiñSp        | 3            | 750.0       | X                         |
| Tibish-Ksud       | 3            | 750.0       | X                         |
| In-RoMoch1Sp      | 3            | 750.0       | X                         |
| In-CrabPor        | 2            | 750.0       | X                         |
| In-HoneyDewUSA    | 3            | 1315.67     | X                         |
| In-AmAoroSp       | 2            | 1429.5      | X                         |
| In-BBredSp        | 3            | 2505.67     | X                         |
| Flex-Co20Ind      | 3            | 2854.67     | X                         |
| Flex-AryaInd      | 3            | 4270.33     | X                         |
| Con-GMJJa         | 3            | 7485.67     | X                         |
| In-TeNinvSp       | 2            | 19420.0     | X                         |
| chate-CarIta      | 1            | 22361.0     | XXXXX                     |
| Con-NanChi        | 3            | 27957.0     | X                         |
| In-AmCañSp        | 3            | 55737.0     | X                         |
| Con-SCKo          | 3            | 72975.7     | X                         |
| Can-HBJUSA        | 3            | 84890.0     | X                         |
| Can-NCFran        | 2            | 122762.     | X                         |
| In-TeNinvSp2      | 2            | 148364.     | XX                        |
| In-TDewUSA        | 3            | 176523.     | X                         |
| Dud-QAPMGeorg     | 3            | 255692.     | X                         |
| Can-DulUSA        | 3            | 281288.     | X                         |
| Dud-QPMAfg        | 3            | 312604.     | X                         |
| In-LaEscrSp       | 2            | 370419.     | XX X                      |
| Con-BaishChi      | 3            | 427764.     | XX                        |
| Can-PearlJa       | 3            | 488041.     | XX                        |
| Ag-CallInd        | 3            | 576956.     | XX X                      |
| Flex-SnakeSA      | 3            | 599164.     | XX X                      |

|              |   |           |              |
|--------------|---|-----------|--------------|
| Am-AnaFran   | 3 | 625534.   | XXXX         |
| Am-KizilUzbe | 3 | 626194.   | XXXX         |
| Can-SemUSA   | 2 | 628472.   | XXXXX        |
| Ag-TendSud   | 3 | 649920.   | XXXX         |
| Can-EanaHun  | 3 | 756776.   | XXXXX        |
| In-TeSp      | 3 | 865997.   | XXXXX        |
| Can-NOFran   | 2 | 956645.   | XXXXXXXXXX   |
| Can-TopUSA   | 3 | 982395.   | XXXXXX       |
| Mom-MR1Ind   | 3 | 1.00707E6 | XXXXXX       |
| Chi-VellInd  | 3 | 1.07184E6 | XXXXXXXXXX   |
| Mom-PII24Ind | 3 | 1.1493E6  | XXXXXXXXXX   |
| La-KroFran   | 4 | 1.15431E6 | XXXXXX       |
| Am-YokIs     | 2 | 1.23448E6 | XXXXXXXXXX   |
| Can-EfJa     | 3 | 1.2899E6  | XXXXXXXXXX   |
| Mom-KhaInd   | 3 | 1.32806E6 | XXXXXXXXXX   |
| In-BBescrSp  | 3 | 1.35812E6 | XXXXXXXXXX   |
| Can-SucrFran | 3 | 1.48969E6 | XXXXXXXXXX   |
| La-ZatIta    | 3 | 1.53443E6 | XXXXXXXXXX   |
| Can-GCHUSA   | 3 | 1.6046E6  | XXXXXXXXXX   |
| Am-TokTaj    | 3 | 1.60672E6 | XXXXXXXXXX   |
| Con-MielChi  | 3 | 1.63613E6 | XXXXXXXXXX   |
| Con-PauPol   | 3 | 1.86466E6 | XXXXXXXXXX   |
| La-CascaPor  | 2 | 2.41212E6 | XXXXXXXXXXXX |
| Ag-15591Gha  | 3 | 2.47532E6 | X XXXXXXXXX  |
| In-ComunSp   | 2 | 2.63246E6 | XXXXXXXXXXXX |
| Ac-G22843Se  | 3 | 2.75941E6 | XXXXXXXXXX   |
| Am-KafEgy    | 2 | 2.79191E6 | XXXXXXXXXX   |
| Am-korcaRus  | 3 | 2.89832E6 | XXXXXXX      |
| La-OgenBul   | 3 | 2.91073E6 | XXXXXX       |
| Can-GyFran   | 2 | 3.17858E6 | XXXXX        |
| Can-PGRFran  | 3 | 3.2618E6  | XXXX         |
| La-ErizoSp   | 3 | 3.47256E6 | XXXX         |
| Am-HassanTur | 3 | 3.69045E6 | XXX          |
| Can-Ogen2Is  | 3 | 3.92796E6 | XX           |
| In-LaBolasSp | 3 | 4.0961E6  | XXX          |
| Am-NesviGeor | 3 | 4.22396E6 | XXX          |
| Can-VedFran  | 3 | 5.30764E6 | XX           |
| Can-WiUSA    | 3 | 5.89209E6 | X            |

#### LSD analysis for U.10 per accessions

Method: 95.0 percentage LSD

| <i>accessions</i> | <i>Cases</i> | <i>Mean</i> | <i>Homogeneous groups</i> |
|-------------------|--------------|-------------|---------------------------|
| Ag-WChInd         | 3            | 750.0       | X                         |
| chate-Carlta      | 1            | 750.0       | XX                        |
| In-HoneyDewUSA    | 3            | 750.0       | X                         |
| Ac-TGR1551Zimb    | 3            | 750.0       | X                         |
| In-CrabPor        | 2            | 750.0       | XX                        |
| Can-SemUSA        | 2            | 750.0       | XX                        |
| Flex-AryaInd      | 3            | 750.0       | X                         |
| Ac-SVIInd         | 2            | 750.0       | XX                        |
| In-BBredSp        | 3            | 750.0       | X                         |
| In-CGBUSA         | 3            | 750.0       | X                         |
| In-TeNinvSp       | 2            | 750.0       | XX                        |
| Flex-Co20Ind      | 3            | 750.0       | X                         |
| Tibish-Ksud       | 3            | 750.0       | X                         |
| Con-ShiroJa       | 3            | 750.0       | X                         |

|               |   |           |      |
|---------------|---|-----------|------|
| Con-FreeCJa   | 3 | 750.0     | X    |
| In-PsPiñSp    | 3 | 750.0     | X    |
| Ac-SRKSLan    | 3 | 750.0     | X    |
| Ag-TendSud    | 3 | 750.0     | X    |
| Can-NCFran    | 2 | 4030.0    | XX   |
| In-TDewUSA    | 3 | 4940.33   | X    |
| In-TeNinvSp2  | 2 | 5271.5    | XX   |
| Am-TokTaj     | 3 | 7687.0    | X    |
| Ag-15591Gha   | 3 | 8755.33   | X    |
| Ag-CallInd    | 3 | 12792.7   | X    |
| In-AmAoroSp   | 2 | 13172.0   | XX   |
| Am-YokIs      | 2 | 23859.5   | XX   |
| In-BBescrSp   | 3 | 24678.3   | XX   |
| In-RoMoch1Sp  | 3 | 25140.3   | XX   |
| Mom-KhaInd    | 3 | 28444.0   | XX   |
| Can-GCHUSA    | 3 | 32633.7   | XX   |
| Am-korcaRus   | 3 | 33597.3   | XX   |
| Am-KafEgy     | 2 | 39669.5   | XX   |
| Chi-VellInd   | 3 | 40364.3   | XX   |
| Am-KizilUzbe  | 3 | 56923.3   | XX   |
| Mom-PII24Ind  | 3 | 60513.0   | XX   |
| In-AmCañSp    | 3 | 61398.0   | XX   |
| La-KroFran    | 4 | 75487.3   | XX   |
| Ac-G22843Se   | 3 | 83900.3   | XX   |
| La-ErizoSp    | 3 | 90822.3   | XX   |
| Am-NesviGeor  | 3 | 112556.   | XX   |
| La-OgenBul    | 3 | 119493.   | XX   |
| In-ComunSp    | 2 | 124441.   | XX   |
| Flex-SnakeSA  | 3 | 146415.   | XX   |
| In-LaEscrSp   | 2 | 147999.   | XX   |
| Dud-QPMAfg    | 3 | 155615.   | XX   |
| Can-EanaHun   | 3 | 163083.   | XX   |
| Mom-MR1Ind    | 3 | 165795.   | XX   |
| Am-HassanTur  | 3 | 166240.   | XX   |
| In-LaBolasSp  | 3 | 176712.   | XX   |
| In-TeSp       | 3 | 178393.   | XX   |
| Can-HBJUSA    | 3 | 189010.   | XX   |
| La-CascaPor   | 2 | 237306.   | XX   |
| Am-AnaFran    | 3 | 261817.   | XX   |
| Can-EfJa      | 3 | 270096.   | XX   |
| Can-PGRFran   | 3 | 272350.   | XX   |
| Can-TopUSA    | 3 | 279398.   | XX   |
| Can-PearlJa   | 3 | 297274.   | XX   |
| Con-PauPol    | 3 | 320996.   | XX   |
| Can-DulUSA    | 3 | 371109.   | XX   |
| Con-GMJJa     | 3 | 378382.   | XX   |
| Can-Ogen2Is   | 3 | 444889.   | XXX  |
| Con-BaishChi  | 3 | 491941.   | XXXX |
| Can-WiUSA     | 3 | 673288.   | XXXX |
| Dud-QAPMGeorg | 3 | 674576.   | XXXX |
| Con-NanChi    | 3 | 728222.   | XXXX |
| Con-SCKo      | 3 | 757815.   | XXX  |
| La-ZatIta     | 3 | 1.18775E6 | XX   |
| Can-NOFran    | 2 | 1.20558E6 | XXXX |
| Con-MielChi   | 3 | 1.4956E6  | XX   |
| Can-SucrFran  | 3 | 1.63537E6 | XX   |
| Can-GyFran    | 2 | 2.01795E6 | X    |

|             |   |           |   |
|-------------|---|-----------|---|
| Can-VedFran | 3 | 3.28353E6 | X |
|-------------|---|-----------|---|

# LSD analysis for U.11 per accessions

Method: 95.0 percentage LSD

| <i>accessions</i> | <i>Cases</i> | <i>Mean</i> | <i>Homogeneous groups</i> |
|-------------------|--------------|-------------|---------------------------|
| Ac-TGR1551Zimb    | 3            | 750.0       | X                         |
| In-ComunSp        | 2            | 3781.0      | XXX                       |
| Con-ShiroJa       | 3            | 5563.67     | XX                        |
| Ac-SVInd          | 2            | 7806.5      | XXXX                      |
| Mom-PII24Ind      | 3            | 8288.33     | XXX                       |
| Dud-QPMAfg        | 3            | 8507.33     | XXX                       |
| Can-SucrFran      | 3            | 9469.67     | XXX                       |
| Con-BaishChi      | 3            | 10206.7     | XXX                       |
| Am-YokIs          | 2            | 10602.5     | XXXXXX                    |
| Ac-SRKSLan        | 3            | 10666.3     | XXX                       |
| Am-HassanTur      | 3            | 11045.3     | XXX                       |
| Con-GMJJa         | 3            | 11203.0     | XXX                       |
| Mom-KhaInd        | 3            | 11518.0     | XXX                       |
| La-CascaPor       | 2            | 14940.0     | XXXXXXXX                  |
| Can-NOFran        | 2            | 16987.0     | XXXXXXXX                  |
| Con-MielChi       | 3            | 19324.7     | XXXXXXXX                  |
| In-AmCañSp        | 3            | 20107.0     | XXXXXXXX                  |
| In-HoneyDewUSA    | 3            | 20454.3     | XXXXXXXX                  |
| In-AmAoroSp       | 2            | 20751.0     | XXXXXXXX                  |
| Dud-QAPMGeorg     | 3            | 21268.0     | XXXXXXXX                  |
| La-ZatIta         | 3            | 21727.0     | XXXXXXXX                  |
| Flex-Co20Ind      | 3            | 21788.7     | XXXXXXXX                  |
| Can-DulUSA        | 3            | 22143.0     | XXXXXXXX                  |
| In-CrabPor        | 2            | 22290.0     | XXXXXXXX                  |
| In-TeSp           | 3            | 22317.7     | XXXXXXXX                  |
| In-BBredSp        | 3            | 22517.0     | XXXXXXXX                  |
| Can-WiUSA         | 3            | 23288.3     | XXXXXXXX                  |
| Am-TokTaj         | 3            | 23593.7     | XXXXXXXX                  |
| Con-SCKo          | 3            | 23876.7     | XXXXXXXX                  |
| Con-FreeCJa       | 3            | 24419.3     | XXXXXXXX                  |
| Can-EfJa          | 3            | 25656.3     | XXXXXXXX                  |
| Can-VedFran       | 3            | 25807.3     | XXXXXXXX                  |
| In-TeNinvSp2      | 2            | 26596.5     | XXXXXXXX                  |
| Am-KizilUzbe      | 3            | 26814.3     | XXXXXXXX                  |
| Chi-VellInd       | 3            | 27478.0     | XXXXXXXX                  |
| Am-korcaRus       | 3            | 28547.3     | XXXXXXXX                  |
| Can-EanaHun       | 3            | 29156.7     | XXXXXXXX                  |
| Can-PGRFran       | 3            | 31223.0     | XXXXXXXX                  |
| Con-PauPol        | 3            | 32304.3     | XXXXXXXX                  |
| In-RoMoch1Sp      | 3            | 32456.7     | XXXXXXXX                  |
| Can-GCHUSA        | 3            | 33268.3     | XXXXXXXX                  |
| In-BBescrSp       | 3            | 34790.0     | XXXXXXXX                  |
| Am-NesviGeor      | 3            | 34873.0     | XXXXXXXX                  |
| Can-TopUSA        | 3            | 34975.3     | XXXXXXXX                  |
| Flex-SnakeSA      | 3            | 35099.3     | XXXXXXXX                  |
| Con-NanChi        | 3            | 35606.0     | XXXXXXXX                  |
| Tibish-Ksud       | 3            | 35998.7     | XXXXXXXX                  |
| Flex-AryaInd      | 3            | 36429.3     | XXXXXXXX                  |
| In-TeNinvSp       | 2            | 37148.5     | XXXXXXXXXX                |
| In-LaBolasSp      | 3            | 38802.7     | XXXXXXXX                  |
| Can-PearlJa       | 3            | 40570.0     | XXXXXXXX                  |

|              |   |         |          |
|--------------|---|---------|----------|
| Mom-MR1Ind   | 3 | 41737.7 | XXXXXXXX |
| chate-CarIta | 1 | 41803.0 | XXXXXXXX |
| Am-KafEgy    | 2 | 41909.5 | XXXXXXXX |
| Am-AnaFran   | 3 | 42612.7 | XXXXXXXX |
| Can-GyFran   | 2 | 42751.5 | XXXXXXXX |
| In-PsPiñSp   | 3 | 45519.0 | XXXXXX   |
| Can-HBJUSA   | 3 | 47891.7 | XXXXXX   |
| In-LaEscrSp  | 2 | 48247.5 | XXXXXX   |
| La-OgenBul   | 3 | 48511.0 | XXXXXX   |
| Can-SemUSA   | 2 | 48989.0 | XXXXXX   |
| La-KroFran   | 4 | 52209.3 | XXXXX    |
| Can-NCFran   | 2 | 54886.5 | XXXXXX   |
| In-TDewUSA   | 3 | 55269.0 | XXX      |
| Can-Ogen2Is  | 3 | 60170.7 | XX       |
| La-ErizoSp   | 3 | 60596.0 | XX       |
| Ac-G22843Se  | 3 | 83608.3 | XX       |
| Ag-15591Gha  | 3 | 108579. | XX       |
| Ag-WChInd    | 3 | 114230. | XX       |
| In-CGBUSA    | 3 | 120895. | XX       |
| Ag-TendSud   | 3 | 136408. | X        |
| Ag-CallInd   | 3 | 138354. | X        |

#### LSD analysis for U.12 per accessions

Method: 95.0 percentage LSD

| <i>accessions</i> | <i>Cases</i> | <i>Mean</i> | <i>Homogeneous groups</i> |
|-------------------|--------------|-------------|---------------------------|
| Dud-QPMAfg        | 3            | 750.0       | X                         |
| Con-ShiroJa       | 3            | 750.0       | X                         |
| Can-NCFran        | 2            | 750.0       | X                         |
| Chi-VellInd       | 3            | 750.0       | X                         |
| Con-MielChi       | 3            | 750.0       | X                         |
| Ac-SV1Ind         | 2            | 750.0       | X                         |
| Con-BaishChi      | 3            | 750.0       | X                         |
| Con-PauPol        | 3            | 767.333     | X                         |
| Mom-PI124Ind      | 3            | 767.333     | X                         |
| Ac-SRKSLan        | 3            | 769.0       | X                         |
| Con-FreeCJa       | 3            | 776.333     | X                         |
| In-HoneyDewUSA    | 3            | 779.0       | X                         |
| Flex-Co20Ind      | 3            | 802.0       | X                         |
| In-AmAoroSp       | 2            | 809.0       | X                         |
| In-ComunSp        | 2            | 831.0       | X                         |
| Am-HassanTur      | 3            | 835.333     | X                         |
| Can-GCHUSA        | 3            | 837.667     | X                         |
| Am-NesviGeor      | 3            | 839.667     | X                         |
| Con-SCKo          | 3            | 843.333     | X                         |
| Can-Ogen2Is       | 3            | 850.0       | X                         |
| In-BBredSp        | 3            | 857.667     | X                         |
| In-BBescrSp       | 3            | 881.333     | X                         |
| Ac-TGR1551Zimb    | 3            | 886.333     | X                         |
| In-TeSp           | 3            | 905.333     | X                         |
| Con-GMJJa         | 3            | 913.667     | X                         |
| Can-VedFran       | 3            | 913.667     | X                         |
| In-LaBolasSp      | 3            | 917.0       | X                         |
| Am-korcaRus       | 3            | 927.667     | X                         |
| In-RoMoch1Sp      | 3            | 944.333     | X                         |
| In-LaEscrSp       | 2            | 944.5       | X                         |
| Am-AnaFran        | 3            | 951.0       | X                         |

|               |   |         |    |
|---------------|---|---------|----|
| Mom-MR1Ind    | 3 | 994.667 | X  |
| In-PsPiñSp    | 3 | 1002.33 | X  |
| La-ErizoSp    | 3 | 1004.0  | X  |
| Can-PGRFran   | 3 | 1010.0  | X  |
| Ag-CallInd    | 3 | 1055.0  | X  |
| Can-EanaHun   | 3 | 1065.33 | X  |
| In-AmCañSp    | 3 | 1066.33 | X  |
| Can-NOFran    | 2 | 1101.0  | X  |
| La-KroFran    | 4 | 1123.25 | X  |
| Ag-WChInd     | 3 | 1172.0  | X  |
| Am-YokIs      | 2 | 1199.0  | X  |
| Can-PearlJa   | 3 | 1203.0  | X  |
| Tibish-Ksud   | 3 | 1257.67 | X  |
| Ag-TendSud    | 3 | 1259.67 | X  |
| Can-SucrFran  | 3 | 1271.0  | X  |
| In-TeNinvSp   | 2 | 1311.0  | X  |
| Am-KizilUzbe  | 3 | 1325.0  | X  |
| Can-EfJa      | 3 | 1378.0  | X  |
| In-TeNinvSp2  | 2 | 1410.5  | X  |
| Am-TokTaj     | 3 | 1414.67 | X  |
| In-CGBUSA     | 3 | 1431.0  | X  |
| Can-WiUSA     | 3 | 1450.67 | X  |
| La-Zatlta     | 3 | 1478.33 | X  |
| In-TDewUSA    | 3 | 1626.0  | X  |
| Can-GyFran    | 2 | 1665.5  | X  |
| Can-TopUSA    | 3 | 1691.67 | X  |
| Can-HBJUSA    | 3 | 1822.67 | X  |
| Can-DulUSA    | 3 | 1906.67 | X  |
| La-OgenBul    | 3 | 1989.0  | X  |
| Can-SemUSA    | 2 | 2914.0  | XX |
| Flex-SnakeSA  | 3 | 2957.0  | XX |
| Con-NanChi    | 3 | 3363.67 | XX |
| Am-KafEgy     | 2 | 4612.5  | XX |
| Flex-AryaInd  | 3 | 5542.67 | XX |
| Mom-KhaInd    | 3 | 5738.33 | XX |
| In-CrabPor    | 2 | 5791.0  | XX |
| Dud-QAPMGeorg | 3 | 10425.7 | XX |
| chate-CarIta  | 1 | 20025.0 | XX |
| Ac-G22843Se   | 3 | 20871.3 | X  |
| La-CascaPor   | 2 | 82430.5 | X  |
| Ag-15591Gha   | 3 | 203551. | X  |

#### LSD analysis for U.13 per accessions

Method: 95.0 percentage LSD

| <i>accessions</i> | <i>Cases</i> | <i>Mean</i> | <i>Homogeneous groups</i> |
|-------------------|--------------|-------------|---------------------------|
| Flex-Co20Ind      | 3            | 750.0       | X                         |
| Can-HBJUSA        | 3            | 750.0       | X                         |
| Can-NCFran        | 2            | 750.0       | XX                        |
| In-AmAoroSp       | 2            | 750.0       | XX                        |
| In-BBescrSp       | 3            | 750.0       | X                         |
| In-AmCañSp        | 3            | 750.0       | X                         |
| Can-PGRFran       | 3            | 750.0       | X                         |
| In-BBredSp        | 3            | 750.0       | X                         |
| Am-TokTaj         | 3            | 750.0       | X                         |
| Can-VedFran       | 3            | 750.0       | X                         |
| In-HoneyDewUSA    | 3            | 750.0       | X                         |

|                |   |         |      |
|----------------|---|---------|------|
| In-CGBUSA      | 3 | 750.0   | X    |
| In-PsPiñSp     | 3 | 750.0   | X    |
| La-OgenBul     | 3 | 750.0   | X    |
| Can-PearlJa    | 3 | 750.0   | X    |
| In-LaEscrSp    | 2 | 750.0   | XX   |
| Can-EanaHun    | 3 | 750.0   | X    |
| In-CrabPor     | 2 | 750.0   | XX   |
| Ac-SRKSLan     | 3 | 750.0   | X    |
| La-KroFran     | 4 | 750.0   | X    |
| Con-BaishChi   | 3 | 750.0   | X    |
| Chi-VellInd    | 3 | 750.0   | X    |
| In-TeNinvSp    | 2 | 750.0   | XX   |
| Can-Ogen2Is    | 3 | 750.0   | X    |
| La-ErizoSp     | 3 | 750.0   | X    |
| Ac-SVIIInd     | 2 | 750.0   | XX   |
| Can-SemUSA     | 2 | 750.0   | XX   |
| In-RoMoch1Sp   | 3 | 750.0   | X    |
| Can-TopUSA     | 3 | 750.0   | X    |
| Can-DulUSA     | 3 | 750.0   | X    |
| chate-Carlta   | 1 | 750.0   | XX   |
| Ac-TGR1551Zimb | 3 | 750.0   | X    |
| In-TeNinvSp2   | 2 | 750.0   | XX   |
| Con-FreeCJa    | 3 | 750.0   | X    |
| Con-GMJJa      | 3 | 750.0   | X    |
| Con-MielChi    | 3 | 750.0   | X    |
| Con-NanChi     | 3 | 750.0   | X    |
| Con-PauPol     | 3 | 750.0   | X    |
| Con-SCKo       | 3 | 750.0   | X    |
| Con-ShiroJa    | 3 | 750.0   | X    |
| Dud-QAPMGeorg  | 3 | 750.0   | X    |
| Can-GyFran     | 2 | 750.0   | XX   |
| In-TDewUSA     | 3 | 862.667 | X    |
| Am-AnaFran     | 3 | 1767.0  | X    |
| Dud-QPMAfg     | 3 | 2133.33 | X    |
| La-ZatIta      | 3 | 2889.67 | X    |
| Am-NesviGeor   | 3 | 3130.67 | X    |
| Can-NOFran     | 2 | 3353.5  | XX   |
| Can-EfJa       | 3 | 3714.33 | X    |
| Ag-CallInd     | 3 | 3735.0  | X    |
| Mom-MR1Ind     | 3 | 4272.0  | X    |
| Tibish-Ksud    | 3 | 4817.67 | X    |
| Can-SucrFran   | 3 | 5913.67 | X    |
| Mom-PII24Ind   | 3 | 7646.0  | XX   |
| Flex-SnakeSA   | 3 | 12557.7 | XX   |
| In-TeSp        | 3 | 13303.3 | XX   |
| In-LaBolasSp   | 3 | 13610.0 | XX   |
| Can-WiUSA      | 3 | 15601.7 | XX   |
| In-ComunSp     | 2 | 16550.0 | XX   |
| Am-korcaRus    | 3 | 20419.3 | XX   |
| Am-HassanTur   | 3 | 23060.0 | XX   |
| Am-KafEgy      | 2 | 23846.5 | XXX  |
| Am-YokIs       | 2 | 29289.0 | XXXX |
| Ac-G22843Se    | 3 | 30306.7 | XXX  |
| La-CascaPor    | 2 | 41192.5 | XXXX |
| Flex-AryaInd   | 3 | 50715.0 | XXXX |
| Mom-KhaInd     | 3 | 52644.0 | XXXX |
| Ag-TendSud     | 3 | 62459.3 | XXX  |

|              |   |         |     |
|--------------|---|---------|-----|
| Am-KizilUzbe | 3 | 84630.3 | xxx |
| Ag-WChInd    | 3 | 89134.3 | xx  |
| Can-GCHUSA   | 3 | 131427. | x   |
| Ag-15591Gha  | 3 | 310902. | x   |

#### LSD analysis for U.14 per accessions

Method: 95.0 percentage LSD

| <i>accessions</i> | <i>Cases</i> | <i>Mean</i> | <i>Homogeneous groups</i> |
|-------------------|--------------|-------------|---------------------------|
| Con-GMJJa         | 3            | 750.0       | X                         |
| Dud-QPMAfg        | 3            | 750.0       | X                         |
| Ac-TGR1551Zimb    | 3            | 750.0       | X                         |
| Ac-SVInd          | 2            | 750.0       | X                         |
| Ac-SRKSLan        | 3            | 777.333     | X                         |
| Chi-VellInd       | 3            | 805.0       | X                         |
| Can-VedFran       | 3            | 834.333     | X                         |
| In-AmCañSp        | 3            | 851.0       | X                         |
| In-LaEscrSp       | 2            | 859.0       | X                         |
| Con-ShiroJa       | 3            | 870.0       | X                         |
| In-HoneyDewUSA    | 3            | 878.333     | X                         |
| Am-NesviGeor      | 3            | 894.333     | X                         |
| Tibish-Ksud       | 3            | 898.333     | X                         |
| Con-BaishChi      | 3            | 905.667     | X                         |
| Con-MielChi       | 3            | 911.667     | X                         |
| La-KroFran        | 4            | 931.0       | X                         |
| La-ErizoSp        | 3            | 951.333     | X                         |
| Con-NanChi        | 3            | 954.667     | X                         |
| Am-HassanTur      | 3            | 957.333     | X                         |
| Flex-SnakeSA      | 3            | 975.667     | X                         |
| Can-EfJa          | 3            | 978.0       | X                         |
| In-ComunSp        | 2            | 990.5       | X                         |
| Am-TokTaj         | 3            | 994.667     | X                         |
| In-RoMoch1Sp      | 3            | 996.667     | X                         |
| Am-AnaFran        | 3            | 996.667     | X                         |
| In-LaBolasSp      | 3            | 1003.33     | X                         |
| Can-TopUSA        | 3            | 1006.33     | X                         |
| Con-SCKo          | 3            | 1010.33     | X                         |
| In-TeNinvSp2      | 2            | 1011.5      | X                         |
| In-AmAoroSp       | 2            | 1014.5      | X                         |
| Can-Ogen2Is       | 3            | 1020.33     | X                         |
| In-TeNinvSp       | 2            | 1020.5      | X                         |
| Can-PGRFran       | 3            | 1030.33     | X                         |
| Dud-QAPMGeorg     | 3            | 1035.67     | X                         |
| Mom-PII24Ind      | 3            | 1037.0      | X                         |
| Can-NCFran        | 2            | 1044.5      | X                         |
| La-ZatIta         | 3            | 1046.33     | X                         |
| Can-NOFran        | 2            | 1083.0      | X                         |
| Can-SucrFran      | 3            | 1091.0      | X                         |
| In-BBescrSp       | 3            | 1110.67     | X                         |
| Mom-MR1Ind        | 3            | 1130.33     | X                         |
| Am-YokIs          | 2            | 1137.5      | X                         |
| Can-PearlJa       | 3            | 1157.33     | X                         |
| La-OgenBul        | 3            | 1159.33     | X                         |
| Can-GyFran        | 2            | 1163.0      | X                         |
| Can-DulUSA        | 3            | 1168.33     | X                         |
| Can-GCHUSA        | 3            | 1201.0      | X                         |
| Can-HBJUSA        | 3            | 1250.67     | X                         |



|              |   |         |   |
|--------------|---|---------|---|
| Can-WiUSA    | 3 | 1264.67 | X |
| In-TDewUSA   | 3 | 1291.0  | X |
| Can-SemUSA   | 2 | 1304.5  | X |
| chate-CarIta | 1 | 1326.0  | X |
| Mom-KhaInd   | 3 | 1332.0  | X |
| Con-PauPol   | 3 | 1363.33 | X |
| Am-korcaRus  | 3 | 1374.67 | X |
| Con-FreeCJa  | 3 | 1401.33 | X |
| In-TeSp      | 3 | 1431.33 | X |
| Can-EanaHun  | 3 | 1447.0  | X |
| In-PsPiñSp   | 3 | 1542.33 | X |
| In-BBredSp   | 3 | 1544.67 | X |
| Am-KafEgy    | 2 | 1563.0  | X |
| In-CrabPor   | 2 | 1628.0  | X |
| Ac-G22843Se  | 3 | 1688.67 | X |
| In-CGBUSA    | 3 | 1694.33 | X |
| Ag-TendSud   | 3 | 1766.33 | X |
| Ag-CallInd   | 3 | 1776.67 | X |
| Flex-AryaInd | 3 | 1790.0  | X |
| Ag-WChInd    | 3 | 1877.67 | X |
| La-CascaPor  | 2 | 1989.0  | X |
| Am-KizilUzbe | 3 | 2130.0  | X |
| Flex-Co20Ind | 3 | 2158.33 | X |
| Ag-15591Gha  | 3 | 49020.7 | X |

#### LSD analysis for U.15 per accessions

Method: 95.0 percentage LSD

| <i>accessions</i> | <i>Cases</i> | <i>Mean</i> | <i>Homogeneous groups</i> |
|-------------------|--------------|-------------|---------------------------|
| Ac-SRKS Lan       | 3            | 750.0       | X                         |
| Ac-SVIInd         | 2            | 750.0       | XX                        |
| Con-ShiroJa       | 3            | 750.0       | X                         |
| Ac-TGR1551Zimb    | 3            | 750.0       | X                         |
| In-RoMoch1Sp      | 3            | 791.667     | X                         |
| Tibish-Ksud       | 3            | 839.667     | X                         |
| Con-BaishChi      | 3            | 885.0       | X                         |
| Can-NCFran        | 2            | 1037.0      | XX                        |
| Can-SemUSA        | 2            | 1305.0      | XX                        |
| Con-NanChi        | 3            | 3594.0      | X                         |
| In-BBescrSp       | 3            | 5668.33     | X                         |
| In-LaEscrSp       | 2            | 6512.5      | XX                        |
| Chi-VellInd       | 3            | 7796.0      | X                         |
| Con-FreeCJa       | 3            | 8638.67     | X                         |
| In-PsPiñSp        | 3            | 8929.67     | X                         |
| Con-GMJJa         | 3            | 9258.67     | X                         |
| Flex-AryaInd      | 3            | 9465.67     | X                         |
| Ag-CallInd        | 3            | 10651.0     | X                         |
| Con-SCKo          | 3            | 10705.0     | X                         |
| In-TeNinvSp2      | 2            | 12182.0     | XX                        |
| In-HoneyDewUSA    | 3            | 15913.3     | XX                        |
| In-AmAoroSp       | 2            | 16052.0     | XX                        |
| Can-TopUSA        | 3            | 21068.3     | XX                        |
| In-CrabPor        | 2            | 23418.5     | XX                        |
| Can-PearlJa       | 3            | 24990.0     | XX                        |
| In-AmCañSp        | 3            | 26166.0     | XX                        |
| Dud-QAPMGeorg     | 3            | 27838.3     | XX                        |
| In-BBredSp        | 3            | 29584.0     | XX                        |

|              |   |         |        |
|--------------|---|---------|--------|
| In-TeNinvSp  | 2 | 30372.0 | XX     |
| In-CGBUSA    | 3 | 31097.3 | XX     |
| Ag-WChInd    | 3 | 31813.3 | XX     |
| Can-EanaHun  | 3 | 32314.3 | XX     |
| Con-PauPol   | 3 | 37489.7 | XX     |
| Dud-QPMAfg   | 3 | 38801.0 | XX     |
| La-ZatIta    | 3 | 39336.3 | XX     |
| Can-SucrFran | 3 | 41041.3 | XX     |
| Can-HBJUSA   | 3 | 41771.3 | XX     |
| Mom-MR1Ind   | 3 | 49977.7 | XX     |
| Can-PGRFran  | 3 | 54510.7 | XX     |
| Con-MielChi  | 3 | 55173.7 | XX     |
| Can-NOFran   | 2 | 56354.5 | XX     |
| Am-AnaFran   | 3 | 56814.3 | XX     |
| In-TDewUSA   | 3 | 57594.7 | XX     |
| chate-CarIta | 1 | 60476.0 | XXXX   |
| Can-GyFran   | 2 | 63291.0 | XX     |
| La-ErizoSp   | 3 | 63344.7 | XX     |
| Am-TokTaj    | 3 | 63722.3 | XX     |
| Flex-Co20Ind | 3 | 66188.3 | XX     |
| Can-EfJa     | 3 | 67258.0 | XX     |
| Can-VedFran  | 3 | 73559.3 | XX     |
| Can-DulUSA   | 3 | 80277.3 | XX     |
| In-TeSp      | 3 | 81782.0 | XX     |
| La-KroFran   | 4 | 84555.0 | XX     |
| Ac-G22843Se  | 3 | 88290.0 | XX     |
| Can-Ogen2Is  | 3 | 94032.7 | XX     |
| Am-NesviGeor | 3 | 99712.7 | XXX    |
| Can-WiUSA    | 3 | 100961. | XXX    |
| Mom-KhaInd   | 3 | 103189. | XXX    |
| La-OgenBul   | 3 | 104421. | XXX    |
| Mom-PII24Ind | 3 | 105680. | XXX    |
| In-LaBolasSp | 3 | 145074. | XXXX   |
| In-ComunSp   | 2 | 160038. | XXXXXX |
| Ag-TendSud   | 3 | 199958. | XXXXXX |
| Ag-15591Gha  | 3 | 203727. | XXXXXX |
| Am-YokIs     | 2 | 254416. | XXXX   |
| Flex-SnakeSA | 3 | 311211. | XXXX   |
| Am-HassanTur | 3 | 313527. | XXXX   |
| Am-KizilUzbe | 3 | 333359. | XXX    |
| La-CascaPor  | 2 | 411930. | XXX    |
| Am-korcaRus  | 3 | 509403. | XXX    |
| Can-GCHUSA   | 3 | 603695. | XX     |
| Am-KafEgy    | 2 | 734360. | X      |

#### LSD analysis for U.16 per accessions

Method: 95.0 percentage LSD

| <i>accessions</i> | <i>Cases</i> | <i>Mean</i> | <i>Homogeneous groups</i> |
|-------------------|--------------|-------------|---------------------------|
| Ac-TGR1551Zimb    | 3            | 19764.7     | X                         |
| Tibish-Ksud       | 3            | 39359.3     | XX                        |
| Ac-SVIInd         | 2            | 41647.5     | XXXX                      |
| In-RoMoch1Sp      | 3            | 44078.0     | XX X                      |
| Chi-VellInd       | 3            | 54202.7     | XX X                      |
| In-HoneyDewUSA    | 3            | 61724.0     | XX X                      |
| Ag-WChInd         | 3            | 62014.7     | XX X                      |
| Flex-Co20Ind      | 3            | 62614.0     | XX X                      |

|              |   |         |             |
|--------------|---|---------|-------------|
| Ac-SRKSLan   | 3 | 64141.3 | XX X        |
| Con-GMJJa    | 3 | 68231.0 | XXXXX       |
| Con-FreeCJa  | 3 | 71064.0 | XXXXX       |
| In-LaEscrSp  | 2 | 76746.0 | XXXXXXXX    |
| La-ZatIta    | 3 | 81007.7 | XXXXX       |
| Con-ShiroJa  | 3 | 82961.0 | XXXXX       |
| In-AmCañSp   | 3 | 83944.7 | XXXXX       |
| In-AmAoroSp  | 2 | 84187.0 | XXXXXXXX    |
| Con-BaishChi | 3 | 94325.7 | XXXXXX      |
| Mom-MR1Ind   | 3 | 95499.3 | XXXXXX      |
| Am-KizilUzbe | 3 | 98104.7 | XXXXXXXX    |
| Mom-KhaInd   | 3 | 99679.0 | XXXXXXXX    |
| Can-NCFran   | 2 | 99775.5 | XXXXXXXXXX  |
| Am-YokIs     | 2 | 102426. | XXXXXXXXXX  |
| Can-EanaHun  | 3 | 105219. | XXXXXXX     |
| Am-korcaRus  | 3 | 106603. | XXXXXXX     |
| In-TDewUSA   | 3 | 109423. | XXXXXXX     |
| Dud-QPMAfg   | 3 | 115447. | XXXXXXXXXX  |
| In-CrabPor   | 2 | 116514. | XXXXXXXXXXX |
| Mom-PII24Ind | 3 | 116699. | XXXXXXXXXX  |
| In-TeSp      | 3 | 121056. | XXXXXXXXXX  |
| In-TeNinvSp  | 2 | 129071. | XXXXXXXXXXX |
| Can-Ogen2Is  | 3 | 129917. | XXXXXXXXXX  |
| Can-VedFran  | 3 | 130333. | XXXXXXXXXX  |
| Am-TokTaj    | 3 | 133639. | XXXXXXXXXX  |
| Ag-TendSud   | 3 | 135639. | XXXXXXXXXX  |
| Can-SucrFran | 3 | 140184. | XXXXXXXXXX  |
| Ac-G22843Se  | 3 | 147745. | XXXXXXXXXX  |
| Can-WiUSA    | 3 | 147944. | XXXXXXXXXX  |
| Can-GCHUSA   | 3 | 163748. | XXXXXXXXXX  |
| Con-SCKo     | 3 | 168920. | XXXXXXXXXX  |
| Flex-SnakeSA | 3 | 168940. | XXXXXXXXXX  |
| Am-NesviGeor | 3 | 178209. | XXXXXXXXXX  |
| In-ComunSp   | 2 | 178514. | XXXXXXXXXX  |
| In-BBredSp   | 3 | 196030. | XXXXXXXXXX  |
| Am-AnaFran   | 3 | 197122. | XXXXXXXXXX  |
| Ag-15591Gha  | 3 | 199959. | XXXXXXXXXX  |
| In-PsPiñSp   | 3 | 201231. | XXXXXXXXXX  |
| Can-PearlJa  | 3 | 214369. | XXXXXXXXXX  |
| In-TeNinvSp2 | 2 | 214731. | XXXXXXXXXX  |
| Can-TopUSA   | 3 | 215386. | XXXXXXXXXX  |
| La-ErizoSp   | 3 | 230388. | XXXXXXXXXX  |
| Can-EfJa     | 3 | 234912. | XXXXXXXXXX  |
| La-OgenBul   | 3 | 236276. | XXXXXXXXXX  |
| Am-KafEgy    | 2 | 244745. | XXXXXXXXXX  |
| Con-NanChi   | 3 | 251619. | XXXXXXXXXX  |
| Can-PGRFran  | 3 | 264159. | XXXXXXXXXX  |
| Ag-CallInd   | 3 | 268471. | XXXXXXXXXX  |
| In-LaBolasSp | 3 | 272476. | XXXXXXXXXX  |
| La-CascaPor  | 2 | 287474. | XXXXXXXXXX  |
| Can-DulUSA   | 3 | 304796. | X XXXXXXX   |
| Can-NOFran   | 2 | 306528. | XXXXXXXXXX  |
| La-KroFran   | 4 | 315505. | XXXXXXX     |
| Con-PauPol   | 3 | 322680. | XXXXXXX     |
| Am-HassanTur | 3 | 334356. | XXXXXXX     |
| Can-HBJUSA   | 3 | 347992. | XXXXXX      |
| Can-SemUSA   | 2 | 353469. | XXXXXXX     |

|               |   |         |       |
|---------------|---|---------|-------|
| In-BBescrSp   | 3 | 354739. | XXX   |
| Dud-QAPMGeorg | 3 | 373076. | XX    |
| Can-GyFran    | 2 | 386490. | XXXXX |
| Con-MielChi   | 3 | 496832. | XXX   |
| Flex-AryaInd  | 3 | 642223. | XX    |
| In-CGBUSA     | 3 | 713601. | X     |
| chate-Carlta  | 1 | 741721. | XX    |

#### LSD analysis for U.17 per accessions

Method: 95.0 percentage LSD

| <i>accessions</i> | <i>Cases</i> | <i>Mean</i> | <i>Homogeneous groups</i> |
|-------------------|--------------|-------------|---------------------------|
| In-AmAoroSp       | 2            | 750.0       | X                         |
| Ac-SRKSLan        | 3            | 750.0       | X                         |
| Tibish-Ksud       | 3            | 750.0       | X                         |
| In-AmCañSp        | 3            | 750.0       | X                         |
| In-BBredSp        | 3            | 750.0       | X                         |
| chate-Carlta      | 1            | 750.0       | XX                        |
| Ag-WChInd         | 3            | 750.0       | X                         |
| In-CGBUSA         | 3            | 750.0       | X                         |
| Con-FreeCJa       | 3            | 750.0       | X                         |
| Flex-AryaInd      | 3            | 750.0       | X                         |
| Ac-TGR1551Zimb    | 3            | 750.0       | X                         |
| In-HoneyDewUSA    | 3            | 750.0       | X                         |
| Ac-SVInd          | 2            | 750.0       | X                         |
| In-CrabPor        | 2            | 750.0       | X                         |
| Con-ShiroJa       | 3            | 750.0       | X                         |
| In-TeNinvSp       | 2            | 750.0       | X                         |
| In-PsPiñSp        | 3            | 750.0       | X                         |
| In-RoMoch1Sp      | 3            | 750.0       | X                         |
| Flex-Co20Ind      | 3            | 750.0       | X                         |
| In-TDewUSA        | 3            | 1279.33     | X                         |
| Can-NCFran        | 2            | 2621.5      | X                         |
| Ag-CallInd        | 3            | 3329.0      | X                         |
| Ag-TendSud        | 3            | 4645.0      | X                         |
| Can-HBJUSA        | 3            | 5004.67     | X                         |
| Can-SemUSA        | 2            | 5258.0      | X                         |
| In-TeNinvSp2      | 2            | 5833.0      | X                         |
| Can-SucrFran      | 3            | 6836.33     | X                         |
| Chi-VellInd       | 3            | 11074.7     | X                         |
| In-LaEscrSp       | 2            | 11497.0     | X                         |
| Can-PearlJa       | 3            | 13168.7     | X                         |
| Mom-PI124Ind      | 3            | 20795.3     | X                         |
| Can-EanaHun       | 3            | 22479.3     | X                         |
| Dud-QPMAfg        | 3            | 27253.0     | X                         |
| Mom-KhaInd        | 3            | 27533.3     | X                         |
| Can-DulUSA        | 3            | 28171.3     | X                         |
| Con-GMJJa         | 3            | 28470.0     | X                         |
| Con-SCKo          | 3            | 32457.0     | X                         |
| La-ZatIta         | 3            | 33574.3     | X                         |
| Con-BaishChi      | 3            | 34991.7     | X                         |
| Flex-SnakeSA      | 3            | 42729.0     | X                         |
| Ag-15591Gha       | 3            | 44742.3     | X                         |
| Can-EfJa          | 3            | 44801.3     | X                         |
| Dud-QAPMGeorg     | 3            | 61457.7     | X                         |
| Mom-MR1Ind        | 3            | 61804.7     | X                         |
| Am-korcaRus       | 3            | 67030.3     | X                         |

|              |   |           |     |
|--------------|---|-----------|-----|
| Con-PauPol   | 3 | 95704.7   | X   |
| Am-KizilUzbe | 3 | 100308.   | X   |
| Con-NanChi   | 3 | 105839.   | X   |
| Can-TopUSA   | 3 | 107762.   | X   |
| Am-YokIs     | 2 | 112135.   | XX  |
| Am-TokTaj    | 3 | 115386.   | XX  |
| La-CascaPor  | 2 | 141591.   | XX  |
| Ac-G22843Se  | 3 | 163385.   | XX  |
| La-KroFran   | 4 | 165859.   | XX  |
| In-BBescrSp  | 3 | 183419.   | XX  |
| Can-WiUSA    | 3 | 189815.   | XX  |
| In-TeSp      | 3 | 215360.   | XX  |
| La-OgenBul   | 3 | 225686.   | XX  |
| Am-AnaFran   | 3 | 226070.   | XX  |
| La-ErizoSp   | 3 | 359457.   | XXX |
| Am-KafEgy    | 2 | 376034.   | XXX |
| Can-NOFran   | 2 | 412908.   | XXX |
| Can-GCHUSA   | 3 | 419613.   | XXX |
| Con-MielChi  | 3 | 486506.   | XXX |
| Am-HassanTur | 3 | 499537.   | XXX |
| Can-Ogen2Is  | 3 | 552593.   | XXX |
| Can-GyFran   | 2 | 789993.   | XX  |
| Can-VedFran  | 3 | 959895.   | XX  |
| In-ComunSp   | 2 | 963657.   | XX  |
| Am-NesviGeor | 3 | 1.50494E6 | XX  |
| In-LaBolasSp | 3 | 1.69798E6 | X   |
| Can-PGRFran  | 3 | 2.06101E6 | X   |

#### LSD analysis for U.18 per accessions

Method: 95.0 percentage LSD

| <i>accessions</i> | <i>Cases</i> | <i>Mean</i> | <i>Homogeneous groups</i> |
|-------------------|--------------|-------------|---------------------------|
| Am-TokTaj         | 3            | 750.0       | X                         |
| In-TDewUSA        | 3            | 750.0       | X                         |
| In-RoMoch1Sp      | 3            | 750.0       | X                         |
| Tibish-Ksud       | 3            | 750.0       | X                         |
| Ac-TGR1551Zimb    | 3            | 750.0       | X                         |
| Ac-SVIInd         | 2            | 750.0       | XX                        |
| Can-NCFran        | 2            | 750.0       | XX                        |
| Ac-SRKSLan        | 3            | 750.0       | X                         |
| In-AmAoroSp       | 2            | 750.0       | XX                        |
| Ag-TendSud        | 3            | 750.0       | X                         |
| Con-FreeCJa       | 3            | 750.0       | X                         |
| In-HoneyDewUSA    | 3            | 750.0       | X                         |
| In-BBredSp        | 3            | 750.0       | X                         |
| Flex-Co20Ind      | 3            | 750.0       | X                         |
| In-TeNinvSp       | 2            | 750.0       | XX                        |
| chate-CarIta      | 1            | 750.0       | XXXXXX                    |
| In-PsPiñSp        | 3            | 750.0       | X                         |
| Con-ShiroJa       | 3            | 750.0       | X                         |
| Ag-WChInd         | 3            | 750.0       | X                         |
| In-CrabPor        | 2            | 750.0       | XX                        |
| Flex-AryaInd      | 3            | 750.0       | X                         |
| Ag-15591Gha       | 3            | 750.0       | X                         |
| Can-SemUSA        | 2            | 750.0       | XX                        |
| In-CGBUSA         | 3            | 750.0       | X                         |
| Ag-CallInd        | 3            | 1168.0      | X                         |

|               |   |         |            |
|---------------|---|---------|------------|
| In-TeNinvSp2  | 2 | 1975.0  | XX         |
| In-AmCañSp    | 3 | 2079.67 | X          |
| Chi-VellInd   | 3 | 2365.33 | X          |
| In-BBescrSp   | 3 | 2380.67 | X          |
| Mom-KhaInd    | 3 | 2520.33 | X          |
| Ac-G22843Se   | 3 | 3302.67 | X          |
| Flex-SnakeSA  | 3 | 4875.33 | XX         |
| Mom-PII24Ind  | 3 | 6191.0  | XX         |
| La-ErizoSp    | 3 | 6491.33 | XX         |
| In-LaEscrSp   | 2 | 6688.5  | XXX        |
| Con-PauPol    | 3 | 6762.67 | XX         |
| Can-HBJUSA    | 3 | 7060.0  | XX         |
| Con-GMJJa     | 3 | 7114.67 | XX         |
| Con-NanChi    | 3 | 7550.0  | XXX        |
| Am-korcaRus   | 3 | 7562.67 | XXX        |
| Am-KafEgy     | 2 | 7788.0  | XXXX       |
| Am-HassanTur  | 3 | 7929.0  | XXX        |
| Con-BaishChi  | 3 | 9542.33 | XXX        |
| Am-KizilUzbe  | 3 | 9849.67 | XXX        |
| Dud-QPMAfg    | 3 | 10030.7 | XXX        |
| Can-GCHUSA    | 3 | 10811.0 | XXX        |
| In-TeSp       | 3 | 10924.7 | XXX        |
| Con-MielChi   | 3 | 12219.7 | XXXX       |
| In-ComunSp    | 2 | 12670.0 | XXXXXX     |
| Can-EanaHun   | 3 | 14916.7 | XXXXXX     |
| La-KroFran    | 4 | 18533.5 | XXXXXX     |
| Am-NesviGeor  | 3 | 18644.3 | XXXXXXX    |
| Am-YokIs      | 2 | 19204.0 | XXXXXXXX   |
| La-CascaPor   | 2 | 23523.5 | XXXXXXXXXX |
| Con-SCKo      | 3 | 23904.3 | XXXXXXXXXX |
| Am-AnaFran    | 3 | 24612.3 | XXXXXXXXXX |
| Can-PearlJa   | 3 | 26561.7 | XXXXXXXXXX |
| In-LaBolasSp  | 3 | 26578.3 | XXXXXXXXXX |
| La-OgenBul    | 3 | 29551.7 | XXXXXXXXXX |
| Can-TopUSA    | 3 | 31069.3 | XXXXXXXXXX |
| Can-PGRFran   | 3 | 34371.7 | XXXXXXXXXX |
| La-ZatlIta    | 3 | 38483.3 | XXXXXXXXXX |
| Dud-QAPMGeorg | 3 | 42352.3 | XXXXXXXX   |
| Can-Ogen2Is   | 3 | 44622.3 | XXXXXX     |
| Mom-MR1Ind    | 3 | 45690.3 | XXXXXX     |
| Can-DulUSA    | 3 | 45704.3 | XXXXXX     |
| Can-EfJa      | 3 | 48934.3 | XXXX       |
| Can-WiUSA     | 3 | 51410.7 | XXX        |
| Can-SucrFran  | 3 | 56063.0 | XX         |
| Can-GyFran    | 2 | 70531.5 | XX         |
| Can-NOFran    | 2 | 98730.5 | XX         |
| Can-VedFran   | 3 | 127006. | X          |

#### LSD analysis for U.19 per accessions

Method: 95.0 percentage LSD

| <i>accessions</i> | <i>Cases</i> | <i>Mean</i> | <i>Homogeneous groups</i> |
|-------------------|--------------|-------------|---------------------------|
| In-CrabPor        | 2            | 750.0       | X                         |
| Ac-SRKSLan        | 3            | 750.0       | X                         |
| In-RoMoch1Sp      | 3            | 750.0       | X                         |
| In-TDewUSA        | 3            | 750.0       | X                         |
| Ag-TendSud        | 3            | 750.0       | X                         |

|                |   |         |     |
|----------------|---|---------|-----|
| Con-FreeCJa    | 3 | 750.0   | X   |
| Tibish-Ksud    | 3 | 750.0   | X   |
| Flex-Co20Ind   | 3 | 750.0   | X   |
| In-AmAoroSp    | 2 | 750.0   | X   |
| Can-SemUSA     | 2 | 750.0   | X   |
| Ac-SVIIInd     | 2 | 750.0   | X   |
| Ag-WChInd      | 3 | 750.0   | X   |
| Flex-AryaInd   | 3 | 750.0   | X   |
| In-CGBUSA      | 3 | 750.0   | X   |
| Ac-TGR1551Zimb | 3 | 750.0   | X   |
| Con-ShiroJa    | 3 | 750.0   | X   |
| In-BBredSp     | 3 | 750.0   | X   |
| chate-CarIta   | 1 | 750.0   | XX  |
| In-PsPiñSp     | 3 | 750.0   | X   |
| In-HoneyDewUSA | 3 | 750.0   | X   |
| Am-TokTaj      | 3 | 1236.0  | X   |
| Can-GCHUSA     | 3 | 1598.0  | X   |
| Chi-VellInd    | 3 | 1605.33 | X   |
| In-TeNinvSp    | 2 | 1651.0  | X   |
| Can-NCFran     | 2 | 1927.5  | X   |
| In-AmCañSp     | 3 | 2423.67 | X   |
| La-KroFran     | 4 | 2741.0  | X   |
| Con-PauPol     | 3 | 2887.67 | X   |
| Am-HassanTur   | 3 | 3582.0  | X   |
| In-BBescrSp    | 3 | 3825.67 | X   |
| In-TeNinvSp2   | 2 | 3856.5  | XX  |
| Am-KizilUzbe   | 3 | 3861.0  | X   |
| Mom-KhaInd     | 3 | 4206.0  | X   |
| Flex-SnakeSA   | 3 | 4318.0  | X   |
| Mom-PII24Ind   | 3 | 4623.0  | X   |
| Am-korcaRus    | 3 | 5355.67 | X   |
| Can-PGRFran    | 3 | 5414.0  | X   |
| Can-HBJUSA     | 3 | 5596.67 | X   |
| Con-NanChi     | 3 | 6207.67 | X   |
| Can-EanaHun    | 3 | 6569.67 | X   |
| Con-BaishChi   | 3 | 7478.0  | X   |
| Con-GMJJa      | 3 | 8471.33 | X   |
| In-LaEscrSp    | 2 | 9110.5  | XX  |
| In-TeSp        | 3 | 13753.3 | XX  |
| In-LaBolasSp   | 3 | 13900.7 | XX  |
| Ag-CallInd     | 3 | 13958.0 | XX  |
| Con-SCKo       | 3 | 16170.7 | XX  |
| Mom-MR1Ind     | 3 | 20313.3 | XX  |
| Con-MielChi    | 3 | 21096.7 | XX  |
| La-ErizoSp     | 3 | 22153.3 | XX  |
| Can-DulUSA     | 3 | 26575.7 | XX  |
| Ag-15591Gha    | 3 | 26667.3 | XX  |
| Can-EfJa       | 3 | 31182.0 | XX  |
| Am-AnaFran     | 3 | 34835.3 | XX  |
| Can-PearlJa    | 3 | 35492.7 | XX  |
| La-OgenBul     | 3 | 37564.0 | XX  |
| Can-TopUSA     | 3 | 37646.7 | XX  |
| Dud-QPMAfg     | 3 | 39600.0 | XXX |
| La-ZatIta      | 3 | 40830.7 | XXX |
| Am-NesviGeor   | 3 | 41393.0 | XXX |
| Can-WiUSA      | 3 | 43115.0 | XXX |
| Ac-G22843Se    | 3 | 44979.3 | XXX |

|               |   |         |      |
|---------------|---|---------|------|
| Dud-QAPMGeorg | 3 | 45658.0 | XXX  |
| Can-NOFran    | 2 | 49737.5 | XXX  |
| Am-KafEgy     | 2 | 51404.5 | XXX  |
| Can-GyFran    | 2 | 58536.0 | XXXX |
| Can-SucrFran  | 3 | 65703.7 | XXX  |
| Can-VedFran   | 3 | 95543.0 | XXX  |
| In-ComunSp    | 2 | 122323. | XX   |
| Can-Ogen2Is   | 3 | 152040. | X    |
| La-CascaPor   | 2 | 152980. | X    |
| Am-YokIs      | 2 | 316942. | X    |

#### LSD analysis for U.20 per accessions

Method: 95.0 percentage LSD

| <i>accessions</i> | <i>Cases</i> | <i>Mean</i> | <i>Homogeneous groups</i> |
|-------------------|--------------|-------------|---------------------------|
| Con-FreeCJa       | 3            | 750.0       | X                         |
| Flex-Co20Ind      | 3            | 750.0       | X                         |
| Ac-TGR1551Zimb    | 3            | 750.0       | X                         |
| In-RoMoch1Sp      | 3            | 750.0       | X                         |
| In-AmAoroSp       | 2            | 750.0       | X                         |
| Ag-15591Gha       | 3            | 750.0       | X                         |
| In-PsPiñSp        | 3            | 750.0       | X                         |
| Tibish-Ksud       | 3            | 750.0       | X                         |
| Ag-TendSud        | 3            | 750.0       | X                         |
| Con-ShiroJa       | 3            | 750.0       | X                         |
| Ac-SRKSLan        | 3            | 750.0       | X                         |
| Ac-SVIIInd        | 2            | 750.0       | X                         |
| In-CGBUSA         | 3            | 750.0       | X                         |
| Ag-WChInd         | 3            | 1321.33     | X                         |
| Flex-SnakeSA      | 3            | 3206.67     | X                         |
| Con-GMJJa         | 3            | 4107.33     | X                         |
| In-HoneyDewUSA    | 3            | 4617.0      | X                         |
| Dud-QPMAfg        | 3            | 4800.0      | X                         |
| Can-HBJUSA        | 3            | 5918.0      | X                         |
| In-TeNinvSp       | 2            | 7038.0      | X                         |
| Con-NanChi        | 3            | 7551.67     | X                         |
| Can-NCFran        | 2            | 7908.5      | X                         |
| In-CrabPor        | 2            | 8317.5      | X                         |
| Con-SCKo          | 3            | 8706.0      | X                         |
| Can-SucrFran      | 3            | 9463.0      | X                         |
| chate-CarIta      | 1            | 10873.0     | XXX                       |
| In-BBescrSp       | 3            | 13294.0     | X                         |
| Mom-KhaInd        | 3            | 14763.7     | X                         |
| Con-PauPol        | 3            | 18201.3     | X                         |
| In-LaEscrSp       | 2            | 18305.0     | X                         |
| Can-DulUSA        | 3            | 20150.0     | X                         |
| Am-TokTaj         | 3            | 20459.0     | X                         |
| Can-WiUSA         | 3            | 24016.0     | X                         |
| La-CascaPor       | 2            | 24229.5     | X                         |
| La-ZatIta         | 3            | 27303.0     | X                         |
| Can-PGRFran       | 3            | 29855.0     | X                         |
| Can-GyFran        | 2            | 34328.5     | XX                        |
| Can-SemUSA        | 2            | 35869.0     | XX                        |
| Dud-QAPMGeorg     | 3            | 39419.7     | X                         |
| Con-MielChi       | 3            | 41691.3     | X                         |
| In-BBredSp        | 3            | 55917.7     | X                         |
| Am-AnaFran        | 3            | 63355.3     | XX                        |



|              |   |         |        |
|--------------|---|---------|--------|
| Ac-G22843Se  | 3 | 63395.7 | XX     |
| Can-TopUSA   | 3 | 64773.0 | XX     |
| Chi-VellInd  | 3 | 84718.7 | XX     |
| Can-EanaHun  | 3 | 85888.0 | XX     |
| In-LaBolasSp | 3 | 93715.0 | XXX    |
| Am-HassanTur | 3 | 93725.7 | XXX    |
| In-ComunSp   | 2 | 99701.5 | XXX    |
| La-KroFran   | 4 | 102504. | XX     |
| Am-korcaRus  | 3 | 111011. | XXX    |
| Can-NOFran   | 2 | 117729. | XXX    |
| Mom-MR1Ind   | 3 | 129020. | XXX    |
| Am-KafEgy    | 2 | 132095. | XXX    |
| Am-KizilUzbe | 3 | 136813. | XXX    |
| Can-EfJa     | 3 | 140112. | XXX    |
| Am-NesviGeor | 3 | 142791. | XXX    |
| Can-VedFran  | 3 | 153635. | XXX    |
| Can-PearlJa  | 3 | 164513. | XXX    |
| Mom-PII24Ind | 3 | 165695. | XXX    |
| Can-Ogen2Is  | 3 | 165782. | XXX    |
| Flex-AryaInd | 3 | 188074. | XXXX   |
| In-TeNinvSp2 | 2 | 193007. | XXXXXX |
| In-TeSp      | 3 | 218681. | XXXXXX |
| La-ErizoSp   | 3 | 282877. | XXXXXX |
| In-TDewUSA   | 3 | 285455. | XXXXXX |
| Can-GCHUSA   | 3 | 317904. | XXXX   |
| Ag-CallInd   | 3 | 402313. | XXX    |
| In-AmCañSp   | 3 | 425328. | XXX    |
| Con-BaishChi | 3 | 458581. | XX     |
| La-OgenBul   | 3 | 642248. | XX     |
| Am-YokIs     | 2 | 801653. | X      |

#### LSD analysis for U.21 per accessions

Method: 95.0 percentage LSD

| <i>accessions</i> | <i>Cases</i> | <i>Mean</i> | <i>Homogeneous groups</i> |
|-------------------|--------------|-------------|---------------------------|
| In-ComunSp        | 2            | 750.0       | XX                        |
| In-CGBUSA         | 3            | 750.0       | XX                        |
| In-CrabPor        | 2            | 750.0       | XX                        |
| In-HoneyDewUSA    | 3            | 750.0       | XX                        |
| In-PsPiñSp        | 3            | 750.0       | XX                        |
| La-ErizoSp        | 3            | 750.0       | XX                        |
| Can-PearlJa       | 3            | 750.0       | XX                        |
| In-LaEscrSp       | 2            | 750.0       | XX                        |
| Mom-PII24Ind      | 3            | 750.0       | XX                        |
| In-TeNinvSp2      | 2            | 750.0       | XX                        |
| Con-BaishChi      | 3            | 750.0       | XX                        |
| In-RoMoch1Sp      | 3            | 750.0       | XX                        |
| Ac-G22843Se       | 3            | 750.0       | XX                        |
| Can-WiUSA         | 3            | 750.0       | XX                        |
| Ac-SVIIInd        | 2            | 750.0       | XX                        |
| In-TeSp           | 3            | 750.0       | XX                        |
| Ac-TGR1551Zimb    | 3            | 750.0       | XX                        |
| chate-CarIta      | 1            | 750.0       | XXX                       |
| Am-HassanTur      | 3            | 750.0       | XX                        |
| Ac-SRKSLan        | 3            | 750.0       | XX                        |
| Am-KafEgy         | 2            | 750.0       | XX                        |
| Can-NCFran        | 2            | 750.0       | XX                        |

|               |   |         |     |
|---------------|---|---------|-----|
| Ag-CallInd    | 3 | 750.0   | XX  |
| Am-KizilUzbe  | 3 | 750.0   | XX  |
| In-TeNinvSp   | 2 | 750.0   | XX  |
| In-TDewUSA    | 3 | 750.0   | XX  |
| Am-TokTaj     | 3 | 750.0   | XX  |
| Can-SucrFran  | 3 | 750.0   | XX  |
| Ag-TendSud    | 3 | 750.0   | XX  |
| La-ZatIta     | 3 | 750.0   | XX  |
| Chi-VellInd   | 3 | 750.0   | XX  |
| Ag-WChInd     | 3 | 750.0   | XX  |
| Tibish-Ksud   | 3 | 750.0   | XX  |
| Con-FreeCJa   | 3 | 750.0   | XX  |
| Con-GMJJa     | 3 | 750.0   | XX  |
| Con-MielChi   | 3 | 750.0   | XX  |
| Con-NanChi    | 3 | 750.0   | XX  |
| Con-PauPol    | 3 | 750.0   | XX  |
| Con-SCKo      | 3 | 750.0   | XX  |
| Con-ShiroJa   | 3 | 750.0   | XX  |
| Ag-15591Gha   | 3 | 750.0   | XX  |
| Dud-QPMAfg    | 3 | 750.0   | XX  |
| Can-HBJUSA    | 3 | 750.0   | XX  |
| Flex-Co20Ind  | 3 | 750.0   | XX  |
| Flex-SnakeSA  | 3 | 750.0   | XX  |
| In-AmAoroSp   | 2 | 750.0   | XX  |
| In-AmCañSp    | 3 | 750.0   | XX  |
| In-BBescrSp   | 3 | 750.0   | XX  |
| In-BBredSp    | 3 | 750.0   | XX  |
| In-LaBolasSp  | 3 | 753.333 | XX  |
| Mom-KhaInd    | 3 | 764.333 | XX  |
| Flex-AryaInd  | 3 | 815.0   | XX  |
| Can-EanaHun   | 3 | 942.333 | XX  |
| La-KroFran    | 4 | 1455.0  | X   |
| Can-GyFran    | 2 | 2349.5  | XX  |
| Am-NesviGeor  | 3 | 3231.67 | XX  |
| Can-PGRFran   | 3 | 4219.67 | XX  |
| Can-NOFran    | 2 | 4247.0  | XX  |
| La-CascaPor   | 2 | 4347.5  | XX  |
| Am-korcaRus   | 3 | 6161.0  | XX  |
| Can-DulUSA    | 3 | 7135.67 | XX  |
| Can-EfJa      | 3 | 9085.33 | XXX |
| Can-VedFran   | 3 | 9888.67 | XXX |
| Can-SemUSA    | 2 | 10973.5 | XXX |
| Mom-MR1Ind    | 3 | 12623.7 | XXX |
| Can-Ogen2Is   | 3 | 15468.0 | XXX |
| Dud-QAPMGeorg | 3 | 15811.3 | XXX |
| Can-TopUSA    | 3 | 18282.0 | XX  |
| Am-AnaFran    | 3 | 25595.3 | X   |
| La-OgenBul    | 3 | 60554.3 | X   |
| Can-GCHUSA    | 3 | 68359.3 | X   |
| Am-YokIs      | 2 | 127161. | X   |

#### LSD analysis for U.22 per accessions

Method: 95.0 percentage LSD

| <i>accessions</i> | <i>Cases</i> | <i>Mean</i> | <i>Homogeneous groups</i> |
|-------------------|--------------|-------------|---------------------------|
| Ac-SVIIInd        | 2            | 3059.5      | X                         |
| In-TeNinvSp2      | 2            | 5181.5      | X                         |

|                |   |         |   |
|----------------|---|---------|---|
| In-CrabPor     | 2 | 7102.0  | X |
| In-BBescrSp    | 3 | 8012.67 | X |
| Mom-PII24Ind   | 3 | 8181.33 | X |
| In-AmCañSp     | 3 | 8591.67 | X |
| Ac-TGR1551Zimb | 3 | 8909.33 | X |
| In-HoneyDewUSA | 3 | 9480.67 | X |
| La-CascaPor    | 2 | 15103.0 | X |
| Can-SucrFran   | 3 | 15246.7 | X |
| In-BBredSp     | 3 | 17627.0 | X |
| Am-TokTaj      | 3 | 18000.7 | X |
| Can-DulUSA     | 3 | 19306.7 | X |
| Con-MielChi    | 3 | 20987.0 | X |
| In-LaBolasSp   | 3 | 21874.3 | X |
| In-TDewUSA     | 3 | 22637.7 | X |
| Mom-MR1Ind     | 3 | 23749.7 | X |
| Con-NanChi     | 3 | 23847.7 | X |
| Can-Ogen2Is    | 3 | 26267.0 | X |
| Chi-VellInd    | 3 | 27214.3 | X |
| In-LaEscrSp    | 2 | 27721.5 | X |
| Can-SemUSA     | 2 | 28627.5 | X |
| Can-TopUSA     | 3 | 28640.0 | X |
| Can-EfJa       | 3 | 29941.3 | X |
| Am-AnaFran     | 3 | 30821.3 | X |
| Am-korcaRus    | 3 | 30868.3 | X |
| In-TeSp        | 3 | 31951.0 | X |
| La-KroFran     | 4 | 32040.8 | X |
| Flex-Co20Ind   | 3 | 32140.0 | X |
| In-AmAoroSp    | 2 | 32194.5 | X |
| Can-WiUSA      | 3 | 33543.7 | X |
| Dud-QPMAfg     | 3 | 35150.7 | X |
| Can-HBJUSA     | 3 | 36322.0 | X |
| Can-VedFran    | 3 | 36497.3 | X |
| In-RoMoch1Sp   | 3 | 36928.7 | X |
| Can-NOFran     | 2 | 37179.5 | X |
| In-TeNinvSp    | 2 | 38670.5 | X |
| La-ErizoSp     | 3 | 39344.3 | X |
| Con-FreeCJa    | 3 | 41438.7 | X |
| Con-PauPol     | 3 | 43905.3 | X |
| Can-PearlJa    | 3 | 44107.7 | X |
| La-ZatIta      | 3 | 45232.7 | X |
| Dud-QAPMGeorg  | 3 | 46965.3 | X |
| La-OgenBul     | 3 | 47470.3 | X |
| Can-GyFran     | 2 | 47602.0 | X |
| Can-NCFran     | 2 | 50984.0 | X |
| Am-NesviGeor   | 3 | 53140.3 | X |
| Can-PGRFran    | 3 | 55274.3 | X |
| Am-HassanTur   | 3 | 56011.0 | X |
| In-ComunSp     | 2 | 60890.5 | X |
| Can-EanaHun    | 3 | 64717.0 | X |
| Ac-SRKSLan     | 3 | 65957.7 | X |
| Tibish-Ksud    | 3 | 76009.3 | X |
| Can-GCHUSA     | 3 | 76253.0 | X |
| Con-GMJJa      | 3 | 103801. | X |
| Mom-KhaInd     | 3 | 108189. | X |
| Am-YokIs       | 2 | 113615. | X |
| Con-BaishChi   | 3 | 115332. | X |
| Con-SCKo       | 3 | 124657. | X |

|              |   |           |     |
|--------------|---|-----------|-----|
| Am-KafEgy    | 2 | 323526.   | XX  |
| Am-KizilUzbe | 3 | 380102.   | XX  |
| Con-ShiroJa  | 3 | 469571.   | XXX |
| Ag-CallInd   | 3 | 538739.   | XXX |
| In-PsPiñSp   | 3 | 1.01406E6 | XXX |
| Ac-G22843Se  | 3 | 1.01708E6 | XXX |
| Ag-WChInd    | 3 | 1.04828E6 | XXX |
| Ag-15591Gha  | 3 | 1.37508E6 | XX  |
| chate-CarIta | 1 | 1.43034E6 | XXX |
| Flex-AryaInd | 3 | 1.76752E6 | X   |
| Flex-SnakeSA | 3 | 2.72608E6 | X   |
| In-CGBUSA    | 3 | 3.53344E6 | X   |
| Ag-TendSud   | 3 | 3.89146E6 | X   |

#### LSD analysis for U.23 per accessions

Method: 95.0 percentage LSD

| <i>accessions</i> | <i>Cases</i> | <i>Mean</i> | <i>Homogeneous groups</i> |
|-------------------|--------------|-------------|---------------------------|
| Con-FreeCJa       | 3            | 750.0       | X                         |
| Ag-WChInd         | 3            | 750.0       | X                         |
| In-HoneyDewUSA    | 3            | 750.0       | X                         |
| Can-NCFran        | 2            | 750.0       | X                         |
| In-AmAoroSp       | 2            | 750.0       | X                         |
| Tibish-Ksud       | 3            | 750.0       | X                         |
| Flex-AryaInd      | 3            | 750.0       | X                         |
| In-CrabPor        | 2            | 750.0       | X                         |
| In-AmCañSp        | 3            | 750.0       | X                         |
| In-PsPiñSp        | 3            | 750.0       | X                         |
| Ac-TGR1551Zimb    | 3            | 750.0       | X                         |
| In-CGBUSA         | 3            | 750.0       | X                         |
| Con-ShiroJa       | 3            | 750.0       | X                         |
| Flex-Co20Ind      | 3            | 750.0       | X                         |
| chate-CarIta      | 1            | 750.0       | XXX                       |
| Ac-SVIIInd        | 2            | 750.0       | X                         |
| Ac-SRKSLan        | 3            | 750.0       | X                         |
| Ag-TendSud        | 3            | 750.0       | X                         |
| Ag-15591Gha       | 3            | 750.0       | X                         |
| In-BBredSp        | 3            | 750.0       | X                         |
| In-RoMoch1Sp      | 3            | 750.0       | X                         |
| In-TeNinvSp       | 2            | 4813.0      | X                         |
| Con-BaishChi      | 3            | 6417.33     | X                         |
| Ag-CallInd        | 3            | 8750.33     | X                         |
| Can-PearlJa       | 3            | 8940.0      | X                         |
| In-TDewUSA        | 3            | 9443.33     | X                         |
| Flex-SnakeSA      | 3            | 10996.0     | X                         |
| Mom-KhaInd        | 3            | 11376.7     | X                         |
| Can-SemUSA        | 2            | 13558.5     | XX                        |
| Am-YokIs          | 2            | 16968.0     | XXX                       |
| Chi-VellInd       | 3            | 17142.0     | X                         |
| In-LaEscrSp       | 2            | 17242.0     | XXX                       |
| Con-GMJJa         | 3            | 19405.7     | X                         |
| Am-KafEgy         | 2            | 21516.5     | XXX                       |
| Con-NanChi        | 3            | 21997.7     | X                         |
| In-TeSp           | 3            | 22885.0     | X                         |
| Con-MielChi       | 3            | 24144.3     | X                         |
| Con-SCKo          | 3            | 25168.3     | X                         |
| Ac-G22843Se       | 3            | 29611.0     | XX                        |

|               |   |         |        |
|---------------|---|---------|--------|
| Dud-QPMAfg    | 3 | 32413.3 | XXX    |
| La-ZatIta     | 3 | 33354.7 | XXX    |
| Am-TokTaj     | 3 | 34738.7 | XXX    |
| Can-EanaHun   | 3 | 36159.0 | XXX    |
| In-TeNinvSp2  | 2 | 38825.5 | XXX    |
| Am-KizilUzbe  | 3 | 41399.3 | XXX    |
| Can-SucrFran  | 3 | 43055.3 | XXX    |
| Can-Ogen2Is   | 3 | 44094.7 | XXX    |
| Mom-MR1Ind    | 3 | 47551.0 | XXX    |
| Mom-PII24Ind  | 3 | 50391.0 | XXX    |
| La-OgenBul    | 3 | 50437.7 | XXX    |
| Can-EfJa      | 3 | 52620.0 | XXX    |
| Dud-QAPMGeorg | 3 | 53536.7 | XXX    |
| Can-VedFran   | 3 | 70519.7 | XXXX   |
| Can-TopUSA    | 3 | 71716.7 | XXXX   |
| Can-HBJUSA    | 3 | 74824.7 | XXXX   |
| Am-AnaFran    | 3 | 79827.3 | XXXXXX |
| Can-NOFran    | 2 | 85194.5 | XXXXXX |
| Can-PGRFran   | 3 | 85353.3 | XXXXXX |
| Con-PauPol    | 3 | 100776. | XXXXXX |
| Can-GCHUSA    | 3 | 114116. | XXXXXX |
| Am-korcaRus   | 3 | 124492. | XXXXXX |
| La-KroFran    | 4 | 150404. | XXXXXX |
| Am-HassanTur  | 3 | 163127. | XXXXXX |
| Am-NesviGeor  | 3 | 210402. | XXXXXX |
| La-CascaPor   | 2 | 217742. | XXXXXX |
| Can-DulUSA    | 3 | 222353. | XXXX   |
| Can-GyFran    | 2 | 234280. | XXXX   |
| In-BBescrSp   | 3 | 260054. | XXXX   |
| La-ErizoSp    | 3 | 275272. | XXX    |
| In-LaBolasSp  | 3 | 319734. | XX     |
| In-ComunSp    | 2 | 342292. | XX     |
| Can-WiUSA     | 3 | 361288. | X      |

#### LSD analysis for U.24 per accessions

Method: 95.0 percentage LSD

| <i>accessions</i> | <i>Cases</i> | <i>Mean</i> | <i>Homogeneous groups</i> |
|-------------------|--------------|-------------|---------------------------|
| Can-HBJUSA        | 3            | 750.0       | X                         |
| In-CGBUSA         | 3            | 750.0       | X                         |
| Ac-SVIIInd        | 2            | 750.0       | XX                        |
| In-PsPiñSp        | 3            | 750.0       | X                         |
| Flex-Co20Ind      | 3            | 750.0       | X                         |
| Tibish-Ksud       | 3            | 750.0       | X                         |
| Ac-TGR1551Zimb    | 3            | 750.0       | X                         |
| In-BBredSp        | 3            | 750.0       | X                         |
| Ag-WChInd         | 3            | 750.0       | X                         |
| Con-FreeCJa       | 3            | 750.0       | X                         |
| In-HoneyDewUSA    | 3            | 750.0       | X                         |
| Con-ShiroJa       | 3            | 750.0       | X                         |
| Con-GMJJa         | 3            | 750.0       | X                         |
| Ac-SRKSLan        | 3            | 750.0       | X                         |
| In-AmAoroSp       | 2            | 750.0       | XX                        |
| In-RoMoch1Sp      | 3            | 750.0       | X                         |
| In-CrabPor        | 2            | 2320.5      | XX                        |
| Dud-QPMAfg        | 3            | 2549.33     | X                         |
| Con-NanChi        | 3            | 2635.33     | X                         |

|               |   |         |          |
|---------------|---|---------|----------|
| chate-Carlta  | 1 | 3041.0  | XXXXXX   |
| Ag-TendSud    | 3 | 3169.0  | XX       |
| In-LaEscrSp   | 2 | 4270.0  | XX       |
| Flex-SnakeSA  | 3 | 4409.33 | XX       |
| Con-SCKo      | 3 | 4456.33 | XX       |
| Can-DulUSA    | 3 | 6045.33 | XX       |
| Can-SucrFran  | 3 | 6746.67 | XX       |
| In-AmCañSp    | 3 | 7138.0  | XX       |
| In-TeNinvSp2  | 2 | 8038.0  | XX       |
| Mom-KhaInd    | 3 | 8348.0  | XX       |
| Can-NCFran    | 2 | 8820.0  | XX       |
| Con-PauPol    | 3 | 10104.7 | XX       |
| Can-PearlJa   | 3 | 10337.7 | XX       |
| In-TeNinvSp   | 2 | 11979.5 | XX       |
| Am-KizilUzbe  | 3 | 14085.0 | XX       |
| La-CascaPor   | 2 | 14599.0 | XX       |
| Am-korcaRus   | 3 | 15382.3 | XX       |
| In-BBescrSp   | 3 | 15608.0 | XX       |
| Can-EanaHun   | 3 | 17297.3 | XX       |
| Can-SemUSA    | 2 | 18014.0 | XXX      |
| La-ZatIta     | 3 | 20302.0 | XX       |
| Chi-VellInd   | 3 | 21955.7 | XX       |
| Dud-QAPMGeorg | 3 | 21976.0 | XX       |
| Am-TokTaj     | 3 | 23690.3 | XX       |
| La-KroFran    | 4 | 25467.0 | XX       |
| Can-TopUSA    | 3 | 25834.0 | XX       |
| Con-MielChi   | 3 | 26984.0 | XX       |
| Ac-G22843Se   | 3 | 28797.3 | XX       |
| Am-HassanTur  | 3 | 32799.0 | XX       |
| Can-WiUSA     | 3 | 33252.0 | XX       |
| Ag-15591Gha   | 3 | 34044.7 | XX       |
| In-TDewUSA    | 3 | 35170.0 | XX       |
| Con-BaishChi  | 3 | 37394.0 | XXX      |
| Can-GyFran    | 2 | 39415.0 | XXXX     |
| Mom-PII24Ind  | 3 | 47480.3 | XXXX     |
| In-ComunSp    | 2 | 52695.0 | XXXXXX   |
| Can-EfJa      | 3 | 54064.0 | XXXX     |
| Am-AnaFran    | 3 | 61745.7 | XXXX     |
| La-ErizoSp    | 3 | 87118.7 | XXXXXXXX |
| Am-KafEgy     | 2 | 98739.5 | XXXXXXXX |
| Mom-MR1Ind    | 3 | 99282.0 | XXXXXXXX |
| Am-NesviGeor  | 3 | 119522. | XXXXXXXX |
| Can-NOFran    | 2 | 142238. | XXXXXXXX |
| Flex-AryaInd  | 3 | 173398. | XXXXXXXX |
| Can-PGRFran   | 3 | 207491. | XXXXXX   |
| Can-GCHUSA    | 3 | 212359. | XXXX     |
| In-LaBolasSp  | 3 | 241273. | XXX      |
| Can-VedFran   | 3 | 251387. | XX       |
| In-TeSp       | 3 | 317688. | XX       |
| Am-YokIs      | 2 | 456287. | XX       |
| Can-Ogen2Is   | 3 | 485897. | XX       |
| Ag-CallInd    | 3 | 537815. | X        |
| La-OgenBul    | 3 | 949386. | X        |

#### LSD analysis for U.25 per accessions

Method: 95.0 percentage LSD

| <i>accessions</i> | <i>Cases</i> | <i>Mean</i> | <i>Homogeneous groups</i> |
|-------------------|--------------|-------------|---------------------------|
| In-LaEscrSp       | 2            | 750.0       | XX                        |
| Tibish-Ksud       | 3            | 750.0       | X                         |
| Con-MielChi       | 3            | 750.0       | X                         |
| In-CGBUSA         | 3            | 750.0       | X                         |
| Can-EanaHun       | 3            | 750.0       | X                         |
| In-TeNinvSp2      | 2            | 750.0       | XX                        |
| Con-NanChi        | 3            | 750.0       | X                         |
| Can-HBJUSA        | 3            | 750.0       | X                         |
| In-TeSp           | 3            | 750.0       | X                         |
| Con-FreeCJa       | 3            | 750.0       | X                         |
| In-AmCañSp        | 3            | 750.0       | X                         |
| La-ErizoSp        | 3            | 750.0       | X                         |
| In-HoneyDewUSA    | 3            | 750.0       | X                         |
| In-BBescrSp       | 3            | 750.0       | X                         |
| In-AmAoroSp       | 2            | 750.0       | XX                        |
| Con-ShiroJa       | 3            | 750.0       | X                         |
| Can-NCFran        | 2            | 750.0       | XX                        |
| In-CrabPor        | 2            | 750.0       | XX                        |
| In-TDewUSA        | 3            | 750.0       | X                         |
| In-RoMoch1Sp      | 3            | 750.0       | X                         |
| Con-GMJJa         | 3            | 750.0       | X                         |
| In-BBredSp        | 3            | 750.0       | X                         |
| Chi-VellInd       | 3            | 750.0       | X                         |
| Ac-TGR1551Zimb    | 3            | 750.0       | X                         |
| Con-BaishChi      | 3            | 750.0       | X                         |
| In-PsPiñSp        | 3            | 750.0       | X                         |
| In-TeNinvSp       | 2            | 750.0       | XX                        |
| Ac-SVInd          | 2            | 750.0       | XX                        |
| Can-PearlJa       | 3            | 750.0       | X                         |
| Con-SCKo          | 3            | 775.0       | X                         |
| Dud-QAPMGeorg     | 3            | 777.333     | X                         |
| Flex-Co20Ind      | 3            | 793.333     | X                         |
| Ac-G22843Se       | 3            | 793.667     | X                         |
| Ac-SRKSLan        | 3            | 849.667     | X                         |
| Ag-CallInd        | 3            | 959.333     | X                         |
| Ag-TendSud        | 3            | 975.333     | X                         |
| Flex-SnakeSA      | 3            | 1083.67     | X                         |
| chate-CarIta      | 1            | 1100.0      | XX                        |
| Ag-WChInd         | 3            | 1152.67     | X                         |
| Flex-AryaInd      | 3            | 1374.33     | X                         |
| Can-TopUSA        | 3            | 6459.33     | X                         |
| Con-PauPol        | 3            | 9309.0      | X                         |
| La-OgenBul        | 3            | 9366.0      | X                         |
| In-LaBolasSp      | 3            | 10825.3     | X                         |
| Mom-KhaInd        | 3            | 17587.3     | XX                        |
| Ag-15591Gha       | 3            | 17869.3     | XX                        |
| Am-YokIs          | 2            | 19067.0     | XX                        |
| Can-SemUSA        | 2            | 21573.0     | XX                        |
| Can-EfJa          | 3            | 22190.0     | XX                        |
| Can-WiUSA         | 3            | 25709.0     | XX                        |
| Can-VedFran       | 3            | 26028.3     | XX                        |
| Am-KafEgy         | 2            | 27733.0     | XX                        |
| In-ComunSp        | 2            | 36124.0     | XX                        |
| Am-TokTaj         | 3            | 38917.7     | XX                        |
| Am-KizilUzbe      | 3            | 41057.7     | XX                        |
| Can-SucrFran      | 3            | 46774.7     | XX                        |

|              |   |           |     |
|--------------|---|-----------|-----|
| La-ZatIta    | 3 | 50081.3   | XX  |
| Am-HassanTur | 3 | 50967.0   | XX  |
| Can-Ogen2Is  | 3 | 61623.0   | XX  |
| Am-korcaRus  | 3 | 63631.3   | XX  |
| Mom-PII24Ind | 3 | 74305.0   | XX  |
| Dud-QPMAfg   | 3 | 76745.3   | XX  |
| Can-GCHUSA   | 3 | 85199.7   | XX  |
| Can-NOFran   | 2 | 103223.   | XXX |
| Am-AnaFran   | 3 | 120391.   | XXX |
| Can-PGRFran  | 3 | 131245.   | XXX |
| Am-NesviGeor | 3 | 149039.   | XXX |
| Can-DulUSA   | 3 | 167749.   | XX  |
| Mom-MR1Ind   | 3 | 243944.   | X   |
| Can-GyFran   | 2 | 270240.   | X   |
| La-KroFran   | 4 | 538242.   | X   |
| La-CascaPor  | 2 | 1.28253E6 | X   |

#### LSD analysis for U.26 per accessions

Method: 95.0 percentage LSD

| <i>accessions</i> | <i>Cases</i> | <i>Mean</i> | <i>Homogeneous groups</i> |
|-------------------|--------------|-------------|---------------------------|
| In-PsPiñSp        | 3            | 750.0       | X                         |
| In-RoMoch1Sp      | 3            | 750.0       | X                         |
| In-TeNinvSp       | 2            | 750.0       | X                         |
| Ac-SRKSLan        | 3            | 750.0       | X                         |
| Con-FreeCJa       | 3            | 750.0       | X                         |
| Con-ShiroJa       | 3            | 750.0       | X                         |
| Ag-WChInd         | 3            | 750.0       | X                         |
| In-AmAoroSp       | 2            | 750.0       | X                         |
| In-CrabPor        | 2            | 750.0       | X                         |
| In-HoneyDewUSA    | 3            | 750.0       | X                         |
| In-AmCañSp        | 3            | 750.0       | X                         |
| Ac-TGR1551Zimb    | 3            | 750.0       | X                         |
| In-BBredSp        | 3            | 750.0       | X                         |
| Tibish-Ksud       | 3            | 750.0       | X                         |
| Ac-SVIInd         | 2            | 750.0       | X                         |
| Flex-Co20Ind      | 3            | 754.333     | X                         |
| In-BBescrSp       | 3            | 848.667     | X                         |
| Ag-TendSud        | 3            | 858.333     | X                         |
| In-TeNinvSp2      | 2            | 881.0       | X                         |
| Chi-VellInd       | 3            | 893.667     | X                         |
| In-CGBUSA         | 3            | 916.0       | X                         |
| Ac-G22843Se       | 3            | 960.667     | X                         |
| Flex-AryaInd      | 3            | 1062.33     | X                         |
| chate-Carlta      | 1            | 1120.0      | XXXX                      |
| Ag-CallInd        | 3            | 1339.33     | X                         |
| Am-TokTaj         | 3            | 1848.33     | X                         |
| In-TDewUSA        | 3            | 1888.67     | X                         |
| Con-BaishChi      | 3            | 3903.67     | X                         |
| Ag-15591Gha       | 3            | 7499.67     | X                         |
| La-ErizoSp        | 3            | 8547.33     | X                         |
| Mom-PII24Ind      | 3            | 10197.3     | X                         |
| Can-SemUSA        | 2            | 10245.5     | X                         |
| Can-NCFran        | 2            | 11738.0     | XX                        |
| Can-HBJUSA        | 3            | 12118.0     | X                         |
| Am-HassanTur      | 3            | 13873.3     | X                         |
| Con-GMJJa         | 3            | 15343.0     | X                         |



|               |   |         |      |
|---------------|---|---------|------|
| Con-NanChi    | 3 | 17423.0 | X    |
| Flex-SnakeSA  | 3 | 20193.0 | X    |
| Can-PearlJa   | 3 | 22026.7 | X    |
| Mom-KhaInd    | 3 | 26227.7 | X    |
| Con-SCKo      | 3 | 28797.0 | X    |
| Con-MielChi   | 3 | 37075.0 | X    |
| Dud-QPMAfg    | 3 | 39939.3 | X    |
| Am-YokIs      | 2 | 41139.5 | XXX  |
| In-LaEscrSp   | 2 | 43422.0 | XXX  |
| In-TeSp       | 3 | 45965.0 | XX   |
| Am-korcaRus   | 3 | 46835.3 | XX   |
| In-ComunSp    | 2 | 47220.5 | XXX  |
| Am-KafEgy     | 2 | 62235.5 | XXXX |
| Con-PauPol    | 3 | 75221.7 | XXX  |
| Am-KizilUzbe  | 3 | 75700.0 | XXX  |
| La-OgenBul    | 3 | 76539.0 | XXX  |
| Can-GCHUSA    | 3 | 95592.7 | XXXX |
| Am-NesviGeor  | 3 | 98655.7 | XXXX |
| La-KroFran    | 4 | 105707. | XXX  |
| Can-EanaHun   | 3 | 122325. | XXXX |
| Can-DulUSA    | 3 | 125272. | XXXX |
| Can-EfJa      | 3 | 145165. | XXXX |
| Can-TopUSA    | 3 | 145514. | XXXX |
| Dud-QAPMGeorg | 3 | 152628. | XXXX |
| La-CascaPor   | 2 | 158752. | XXXX |
| Can-WiUSA     | 3 | 178436. | XXXX |
| Am-AnaFran    | 3 | 184849. | XXXX |
| Can-Ogen2Is   | 3 | 188898. | XXXX |
| La-ZatIta     | 3 | 210718. | XXXX |
| In-LaBolasSp  | 3 | 253281. | XXXX |
| Can-SucrFran  | 3 | 307369. | XXXX |
| Can-PGRFran   | 3 | 324432. | XXX  |
| Mom-MR1Ind    | 3 | 356180. | XX   |
| Can-VedFran   | 3 | 526074. | XX   |
| Can-GyFran    | 2 | 797080. | XX   |
| Can-NOFran    | 2 | 978694. | X    |

#### LSD analysis for U.27 per accessions

Method: 95.0 percentage LSD

| <i>accessions</i> | <i>Cases</i> | <i>Mean</i> | <i>Homogeneous groups</i> |
|-------------------|--------------|-------------|---------------------------|
| In-ComunSp        | 2            | 750.0       | X                         |
| Con-GMJJa         | 3            | 750.0       | X                         |
| In-RoMoch1Sp      | 3            | 750.0       | X                         |
| Con-MielChi       | 3            | 751.333     | X                         |
| Mom-PII24Ind      | 3            | 825.333     | X                         |
| Can-VedFran       | 3            | 860.333     | X                         |
| Can-TopUSA        | 3            | 895.333     | X                         |
| Can-SemUSA        | 2            | 1137.5      | X                         |
| Am-YokIs          | 2            | 1186.5      | X                         |
| Am-KizilUzbe      | 3            | 1339.0      | X                         |
| La-CascaPor       | 2            | 1612.0      | XX                        |
| chate-CarIta      | 1            | 1644.0      | XXXX                      |
| Flex-SnakeSA      | 3            | 2407.0      | X                         |
| Dud-QPMAfg        | 3            | 2778.67     | X                         |
| Can-DulUSA        | 3            | 3874.33     | X                         |
| Can-HBJUSA        | 3            | 4938.0      | X                         |

|                |   |         |      |
|----------------|---|---------|------|
| Chi-VellInd    | 3 | 5595.67 | X    |
| Dud-QAPMGeorg  | 3 | 5967.33 | X    |
| In-TeNinvSp2   | 2 | 6038.0  | XXX  |
| Ac-SVIIInd     | 2 | 6325.5  | XXX  |
| Ag-15591Gha    | 3 | 6650.0  | X    |
| Can-EfJa       | 3 | 7708.33 | X    |
| Am-TokTaj      | 3 | 7720.33 | X    |
| Ag-TendSud     | 3 | 7970.0  | X    |
| Am-korcaRus    | 3 | 8489.33 | XX   |
| In-TeNinvSp    | 2 | 9164.5  | XXX  |
| Can-SucrFran   | 3 | 9812.67 | XX   |
| La-OgenBul     | 3 | 10060.7 | XX   |
| Flex-AryaInd   | 3 | 11714.7 | XXX  |
| Con-ShiroJa    | 3 | 12022.7 | XXX  |
| La-ErizoSp     | 3 | 12267.0 | XXX  |
| Am-AnaFran     | 3 | 12323.0 | XXX  |
| Can-WiUSA      | 3 | 12378.0 | XXX  |
| Con-NanChi     | 3 | 12539.3 | XXX  |
| In-CGBUSA      | 3 | 13037.7 | XXX  |
| In-LaEscrSp    | 2 | 13095.5 | XXX  |
| Con-SCKo       | 3 | 13432.7 | XXX  |
| Can-Ogen2Is    | 3 | 13598.7 | XXX  |
| In-CrabPor     | 2 | 14177.5 | XXXX |
| Con-BaishChi   | 3 | 14314.7 | XXX  |
| In-HoneyDewUSA | 3 | 15097.7 | XXX  |
| In-PsPiñSp     | 3 | 15781.3 | XXX  |
| Ac-SRKSLan     | 3 | 15882.3 | XXX  |
| Can-NOFran     | 2 | 17502.0 | XXXX |
| Can-PGRFran    | 3 | 17668.3 | XXX  |
| Mom-KhaInd     | 3 | 17900.7 | XXX  |
| Can-GCHUSA     | 3 | 18227.0 | XXX  |
| Ac-TGR1551Zimb | 3 | 18261.7 | XXX  |
| In-BBescrSp    | 3 | 19428.3 | XXX  |
| In-AmCañSp     | 3 | 19629.3 | XXX  |
| In-BBredSp     | 3 | 21768.7 | XXXX |
| Am-NesviGeor   | 3 | 23098.3 | XXXX |
| Tibish-Ksud    | 3 | 25930.0 | XXXX |
| Can-GyFran     | 2 | 26608.5 | XXXX |
| In-AmAoroSp    | 2 | 26871.0 | XXXX |
| Mom-MR1Ind     | 3 | 28464.0 | XXXX |
| In-LaBolasSp   | 3 | 29499.7 | XXXX |
| Ag-CallInd     | 3 | 29537.0 | XXXX |
| In-TDewUSA     | 3 | 29821.3 | XXXX |
| La-ZatIta      | 3 | 30046.7 | XXXX |
| Can-NCFran     | 2 | 31254.0 | XXXX |
| In-TeSp        | 3 | 33333.3 | XXXX |
| Ac-G22843Se    | 3 | 35414.7 | XXXX |
| Am-HassanTur   | 3 | 35948.3 | XXXX |
| La-KroFran     | 4 | 37488.8 | XXXX |
| Can-PearlJa    | 3 | 43678.7 | XXXX |
| Can-EanaHun    | 3 | 46073.7 | XXXX |
| Am-KafEgy      | 2 | 59942.0 | XXXX |
| Ag-WChInd      | 3 | 63200.3 | XXX  |
| Con-PauPol     | 3 | 65595.7 | XX   |
| Con-FreeCJa    | 3 | 75686.3 | X    |
| Flex-Co20Ind   | 3 | 142724. | X    |

# LSD analysis for U.28 per accessions

Method: 95.0 percentage LSD

| <i>accessions</i> | <i>Cases</i> | <i>Mean</i> | <i>Homogeneous groups</i> |
|-------------------|--------------|-------------|---------------------------|
| Can-HBJUSA        | 3            | 750.0       | X                         |
| Dud-QPMAfg        | 3            | 750.0       | X                         |
| Con-FreeCJa       | 3            | 750.0       | X                         |
| Ag-WChInd         | 3            | 750.0       | X                         |
| Con-SCKo          | 3            | 750.0       | X                         |
| In-CGBUSA         | 3            | 750.0       | X                         |
| In-PsPiñSp        | 3            | 750.0       | X                         |
| In-RoMoch1Sp      | 3            | 750.0       | X                         |
| Con-GMJJa         | 3            | 750.0       | X                         |
| Ac-SV1Ind         | 2            | 750.0       | X                         |
| Can-NCFran        | 2            | 750.0       | X                         |
| Con-ShiroJa       | 3            | 750.0       | X                         |
| Con-PauPol        | 3            | 750.0       | X                         |
| In-HoneyDewUSA    | 3            | 750.0       | X                         |
| In-CrabPor        | 2            | 750.0       | X                         |
| In-BBredSp        | 3            | 750.0       | X                         |
| Ac-TGR1551Zimb    | 3            | 750.0       | X                         |
| Flex-Co20Ind      | 3            | 750.0       | X                         |
| Ac-SRKSLan        | 3            | 750.0       | X                         |
| Con-NanChi        | 3            | 750.0       | X                         |
| chate-Carlta      | 1            | 750.0       | X                         |
| Ag-TendSud        | 3            | 750.0       | X                         |
| In-AmAoroSp       | 2            | 750.0       | X                         |
| Tibish-Ksud       | 3            | 750.0       | X                         |
| Mom-KhaInd        | 3            | 750.0       | X                         |
| Can-DulUSA        | 3            | 1562.67     | X                         |
| Flex-SnakeSA      | 3            | 1574.0      | X                         |
| In-BBescrSp       | 3            | 1627.67     | X                         |
| In-LaEscrSp       | 2            | 2051.0      | X                         |
| La-CascaPor       | 2            | 2408.0      | X                         |
| Am-AnaFran        | 3            | 2725.67     | X                         |
| Con-MielChi       | 3            | 2987.67     | X                         |
| Can-SucrFran      | 3            | 3122.33     | X                         |
| Dud-QAPMGeorg     | 3            | 3447.67     | X                         |
| In-TeNinvSp       | 2            | 4176.0      | X                         |
| In-TeNinvSp2      | 2            | 4284.5      | X                         |
| Con-BaishChi      | 3            | 4836.33     | X                         |
| Can-PearlJa       | 3            | 5146.67     | X                         |
| Can-WiUSA         | 3            | 5418.33     | X                         |
| Can-SemUSA        | 2            | 5457.0      | X                         |
| Ac-G22843Se       | 3            | 5460.33     | X                         |
| Am-korcaRus       | 3            | 5605.0      | X                         |
| In-AmCañSp        | 3            | 5831.67     | X                         |
| Can-GyFran        | 2            | 6258.0      | X                         |
| Am-KizilUzbe      | 3            | 6310.67     | X                         |
| In-TDewUSA        | 3            | 6665.0      | X                         |
| La-KroFran        | 4            | 6669.5      | X                         |
| Can-TopUSA        | 3            | 6705.0      | X                         |
| Chi-VellInd       | 3            | 6898.33     | X                         |
| Can-EanaHun       | 3            | 7464.67     | X                         |
| Am-TokTaj         | 3            | 7483.33     | X                         |
| La-ErizoSp        | 3            | 11074.7     | X                         |
| Ag-15591Gha       | 3            | 12458.7     | X                         |

|              |   |         |     |
|--------------|---|---------|-----|
| In-ComunSp   | 2 | 13578.5 | X   |
| La-ZatIta    | 3 | 14203.3 | X   |
| Can-EfJa     | 3 | 15454.7 | X   |
| Mom-PII24Ind | 3 | 17104.7 | X   |
| Am-HassanTur | 3 | 19760.0 | X   |
| Can-PGRFran  | 3 | 20549.0 | X   |
| Can-VedFran  | 3 | 22374.3 | X   |
| Am-KafEgy    | 2 | 24851.0 | X   |
| In-LaBolasSp | 3 | 25712.7 | X   |
| Can-Ogen2Is  | 3 | 27252.0 | X   |
| Can-NOFran   | 2 | 28304.5 | X   |
| Can-GCHUSA   | 3 | 32115.7 | X   |
| Am-YokIs     | 2 | 35604.0 | XX  |
| Am-NesviGeor | 3 | 36384.3 | X   |
| Mom-MRIInd   | 3 | 64827.0 | XXX |
| La-OgenBul   | 3 | 131158. | XX  |
| In-TeSp      | 3 | 143032. | X   |
| Flex-AryaInd | 3 | 252003. | X   |
| Ag-CallInd   | 3 | 373330. | X   |

#### LSD analysis for U.29 per accessions

Method: 95.0 percentage LSD

| <i>accessions</i> | <i>Cases</i> | <i>Mean</i> | <i>Homogeneous groups</i> |
|-------------------|--------------|-------------|---------------------------|
| In-PsPiñSp        | 3            | 750.0       | X                         |
| In-HoneyDewUSA    | 3            | 750.0       | X                         |
| In-CrabPor        | 2            | 750.0       | XXXX                      |
| chate-CarIta      | 1            | 750.0       | XXXXXX                    |
| Ac-SRKSLan        | 3            | 750.0       | X                         |
| Ac-G22843Se       | 3            | 750.0       | X                         |
| Con-FreeCJa       | 3            | 750.0       | X                         |
| In-TeNinvSp       | 2            | 750.0       | XXXX                      |
| Flex-Co20Ind      | 3            | 750.0       | X                         |
| Tibish-Ksud       | 3            | 750.0       | X                         |
| In-AmAoroSp       | 2            | 750.0       | XXXX                      |
| Ag-TendSud        | 3            | 750.0       | X                         |
| Flex-SnakeSA      | 3            | 750.0       | X                         |
| In-CGBUSA         | 3            | 750.0       | X                         |
| Can-PearlJa       | 3            | 750.0       | X                         |
| In-BBredSp        | 3            | 750.0       | X                         |
| Ag-15591Gha       | 3            | 750.0       | X                         |
| Con-ShiroJa       | 3            | 750.0       | X                         |
| In-AmCañSp        | 3            | 750.0       | X                         |
| Can-SemUSA        | 2            | 750.0       | XXXX                      |
| Con-GMJJa         | 3            | 750.0       | X                         |
| In-TDewUSA        | 3            | 750.0       | X                         |
| In-RoMoch1Sp      | 3            | 750.0       | X                         |
| Ac-SVIInd         | 2            | 750.0       | XXXX                      |
| Ag-WChInd         | 3            | 750.0       | X                         |
| Ag-CallInd        | 3            | 750.0       | X                         |
| Ac-TGR1551Zimb    | 3            | 750.0       | X                         |
| Am-TokTaj         | 3            | 750.0       | X                         |
| Chi-VellInd       | 3            | 868.333     | X                         |
| Flex-AryaInd      | 3            | 875.667     | X                         |
| Con-BaishChi      | 3            | 2023.33     | X X                       |
| Can-NCFran        | 2            | 2055.5      | XXXX                      |
| In-BBescrSp       | 3            | 2753.0      | X XX                      |

|               |   |         |            |
|---------------|---|---------|------------|
| In-TeSp       | 3 | 2810.0  | X XX       |
| Mom-PII24Ind  | 3 | 3494.67 | X XX       |
| Mom-KhaInd    | 3 | 3507.67 | X XX       |
| Can-EanaHun   | 3 | 4318.33 | XXXX       |
| In-LaEscrSp   | 2 | 4434.0  | XXXXXX     |
| Con-NanChi    | 3 | 6864.33 | XXXX       |
| Mom-MR1Ind    | 3 | 7165.67 | XXXXXX     |
| La-ZatIta     | 3 | 7583.33 | XXXXXX     |
| Con-SCKo      | 3 | 7792.33 | XXXXXX     |
| Am-YokIs      | 2 | 7816.0  | XXXXXXX    |
| Am-KafEgy     | 2 | 8512.5  | XXXXXXX    |
| Am-KizilUzbe  | 3 | 9477.0  | XXXXXX     |
| In-TeNinvSp2  | 2 | 10347.0 | XXXXXXX    |
| Dud-QPMAfg    | 3 | 10855.0 | XXXXXXX    |
| Can-HBJUSA    | 3 | 10864.0 | XXXXXXX    |
| Am-HassanTur  | 3 | 13707.0 | XXXXXXX    |
| Can-TopUSA    | 3 | 20017.7 | XXXXXXXX   |
| La-OgenBul    | 3 | 20369.3 | XXXXXXXX   |
| Can-SucrFran  | 3 | 21700.0 | XXXXXXXX   |
| Am-korcaRus   | 3 | 27330.3 | XXXXXXXXXX |
| Dud-QAPMGeorg | 3 | 28375.0 | XXXXXXXXXX |
| Con-MielChi   | 3 | 29397.7 | XXXXXXXXXX |
| Can-Ogen2Is   | 3 | 30410.7 | XXXXXXXXXX |
| Can-NOFran    | 2 | 30627.0 | XXXXXXXXXX |
| Can-PGRFran   | 3 | 34861.7 | X XXXX     |
| Can-GyFran    | 2 | 35655.5 | XXXXXXXX   |
| In-ComunSp    | 2 | 37269.5 | X XXXXX    |
| Con-PauPol    | 3 | 38016.3 | XXXX       |
| Am-NesviGeor  | 3 | 40962.3 | XXX        |
| Can-VedFran   | 3 | 41441.0 | XXX        |
| Can-EfJa      | 3 | 41841.7 | XXX        |
| Am-AnaFran    | 3 | 46681.0 | XXX        |
| La-ErizoSp    | 3 | 48240.0 | XXX        |
| In-LaBolasSp  | 3 | 48901.3 | XXX        |
| Can-WiUSA     | 3 | 54618.0 | XXX        |
| Can-GCHUSA    | 3 | 73181.7 | XXX        |
| Can-DulUSA    | 3 | 80867.7 | XX         |
| La-KroFran    | 4 | 96526.5 | XX         |
| La-CascaPor   | 2 | 124606. | X          |

#### LSD analysis for U.30 per accessions

Method: 95.0 percentage LSD

| <i>accessions</i> | <i>Cases</i> | <i>Mean</i> | <i>Homogeneous groups</i> |
|-------------------|--------------|-------------|---------------------------|
| Ac-SVIInd         | 2            | 750.0       | X                         |
| Mom-PII24Ind      | 3            | 750.0       | X                         |
| Con-BaishChi      | 3            | 750.0       | X                         |
| Ac-TGR1551Zimb    | 3            | 750.0       | X                         |
| La-CascaPor       | 2            | 750.0       | X                         |
| In-AmAoroSp       | 2            | 750.0       | X                         |
| Con-FreeCJa       | 3            | 750.0       | X                         |
| Ag-CallInd        | 3            | 750.0       | X                         |
| In-RoMoch1Sp      | 3            | 750.0       | X                         |
| Con-ShiroJa       | 3            | 750.0       | X                         |
| In-PsPiñSp        | 3            | 750.0       | X                         |
| In-HoneyDewUSA    | 3            | 750.0       | X                         |
| Tibish-Ksud       | 3            | 750.0       | X                         |

|               |   |         |    |
|---------------|---|---------|----|
| In-TeNinvSp2  | 2 | 750.0   | X  |
| In-AmCañSp    | 3 | 750.0   | X  |
| La-ZatIta     | 3 | 750.0   | X  |
| La-OgenBul    | 3 | 750.0   | X  |
| In-BBredSp    | 3 | 750.333 | X  |
| In-CGBUSA     | 3 | 773.667 | X  |
| Can-SemUSA    | 2 | 782.5   | X  |
| Flex-Co20Ind  | 3 | 794.0   | X  |
| Ac-SRKSLan    | 3 | 844.667 | X  |
| Flex-AryaInd  | 3 | 918.0   | X  |
| Ag-WChInd     | 3 | 976.0   | X  |
| Am-TokTaj     | 3 | 1733.0  | X  |
| Can-EanaHun   | 3 | 1750.67 | X  |
| Con-SCKo      | 3 | 1835.0  | X  |
| Con-GMJJa     | 3 | 1987.33 | X  |
| Can-NCFran    | 2 | 1997.5  | X  |
| Can-TopUSA    | 3 | 2310.33 | X  |
| In-CrabPor    | 2 | 2338.5  | X  |
| Chi-VellInd   | 3 | 2846.33 | X  |
| Can-DulUSA    | 3 | 2943.33 | X  |
| In-BBescrSp   | 3 | 2978.67 | X  |
| Dud-QPMAfg    | 3 | 5222.33 | X  |
| Am-AnaFran    | 3 | 5503.67 | X  |
| In-TDewUSA    | 3 | 6081.33 | X  |
| In-LaEscrSp   | 2 | 6945.5  | X  |
| Con-NanChi    | 3 | 7134.67 | X  |
| In-TeNinvSp   | 2 | 7840.5  | X  |
| Ag-TendSud    | 3 | 10029.3 | X  |
| Mom-MR1Ind    | 3 | 10046.3 | X  |
| Con-MielChi   | 3 | 10836.3 | X  |
| chate-CarIta  | 1 | 12124.0 | XX |
| Dud-QAPMGeorg | 3 | 12249.3 | X  |
| Can-EfJa      | 3 | 13803.3 | X  |
| In-LaBolasSp  | 3 | 14256.0 | X  |
| In-TeSp       | 3 | 14504.7 | X  |
| Can-PearlJa   | 3 | 14583.7 | X  |
| Mom-KhaInd    | 3 | 14868.3 | X  |
| Con-PauPol    | 3 | 19977.3 | X  |
| Am-NesviGeor  | 3 | 20423.3 | X  |
| La-KroFran    | 4 | 20979.3 | X  |
| La-ErizoSp    | 3 | 22582.0 | X  |
| Can-SucrFran  | 3 | 25133.3 | X  |
| Am-YokIs      | 2 | 31125.0 | XX |
| Can-NOFran    | 2 | 31476.0 | XX |
| Can-HBJUSA    | 3 | 31515.7 | X  |
| In-ComunSp    | 2 | 37757.0 | XX |
| Am-HassanTur  | 3 | 39794.0 | XX |
| Am-korcaRus   | 3 | 43243.0 | XX |
| Can-WiUSA     | 3 | 44363.7 | XX |
| Can-Ogen2Is   | 3 | 45519.3 | XX |
| Can-GyFran    | 2 | 52902.5 | XX |
| Am-KafEgy     | 2 | 59846.5 | XX |
| Flex-SnakeSA  | 3 | 61284.3 | XX |
| Can-PGRFran   | 3 | 96798.0 | XX |
| Can-VedFran   | 3 | 109771. | XX |
| Ac-G22843Se   | 3 | 117972. | XX |
| Am-KizilUzbe  | 3 | 132656. | XX |

|             |   |         |   |
|-------------|---|---------|---|
| Can-GCHUSA  | 3 | 170277. | X |
| Ag-15591Gha | 3 | 480154. | X |

# LSD analysis for U.31 per accessions

Method: 95.0 percentage LSD

| <i>accessions</i> | <i>Cases</i> | <i>Mean</i> | <i>Homogeneous groups</i> |
|-------------------|--------------|-------------|---------------------------|
| Can-NCFran        | 2            | 750.0       | XXXX                      |
| In-TDewUSA        | 3            | 750.0       | X                         |
| Ac-SVIIInd        | 2            | 750.0       | XXXX                      |
| In-TeNinvSp       | 2            | 750.0       | XXXX                      |
| In-CGBUSA         | 3            | 750.0       | X                         |
| Can-SemUSA        | 2            | 750.0       | XXXX                      |
| Ac-SRKSLan        | 3            | 750.0       | X                         |
| In-RoMoch1Sp      | 3            | 750.0       | X                         |
| Ag-WChInd         | 3            | 750.0       | X                         |
| In-BBredSp        | 3            | 750.0       | X                         |
| In-CrabPor        | 2            | 750.0       | XXXX                      |
| Tibish-Ksud       | 3            | 750.0       | X                         |
| In-HoneyDewUSA    | 3            | 753.0       | X                         |
| In-AmAoroSp       | 2            | 757.5       | XXXX                      |
| Ac-TGR1551Zimb    | 3            | 760.333     | X                         |
| Flex-Co20Ind      | 3            | 766.0       | X                         |
| Ag-15591Gha       | 3            | 776.333     | X                         |
| Con-ShiroJa       | 3            | 780.667     | X                         |
| In-LaEscrSp       | 2            | 784.5       | XXXX                      |
| In-PsPiñSp        | 3            | 812.667     | X                         |
| Con-FreeCJa       | 3            | 816.667     | X                         |
| Ag-TendSud        | 3            | 858.333     | X                         |
| Am-TokTaj         | 3            | 862.667     | X                         |
| Mom-KhaInd        | 3            | 890.333     | X                         |
| Chi-VellInd       | 3            | 893.667     | X                         |
| In-TeSp           | 3            | 894.667     | X                         |
| In-AmCañSp        | 3            | 897.333     | X                         |
| Can-PearlJa       | 3            | 1014.67     | X                         |
| Flex-AryaInd      | 3            | 1080.0      | X                         |
| Ac-G22843Se       | 3            | 1087.67     | X                         |
| chate-Carlta      | 1            | 1120.0      | XXXXXXXX                  |
| Mom-MR1Ind        | 3            | 1767.67     | X                         |
| Ag-CallInd        | 3            | 3178.0      | XX                        |
| Con-GMJJa         | 3            | 3601.33     | XX                        |
| Con-SCKo          | 3            | 5037.67     | XXX                       |
| Can-HBJUSA        | 3            | 5210.67     | XXX                       |
| Flex-SnakeSA      | 3            | 5346.33     | XXX                       |
| Can-EanaHun       | 3            | 6206.0      | XXXX                      |
| Con-BaishChi      | 3            | 7088.0      | XXXX                      |
| Mom-PII24Ind      | 3            | 7093.0      | XXXX                      |
| La-Zatlta         | 3            | 7957.67     | XXXX                      |
| In-BBescrSp       | 3            | 8941.33     | XXXX                      |
| Am-YokIs          | 2            | 9175.5      | XXXXXX                    |
| Am-KafEgy         | 2            | 10484.5     | XXXXXX                    |
| In-TeNinvSp2      | 2            | 10592.0     | XXXXXX                    |
| Am-korcaRus       | 3            | 13820.7     | XXXXXX                    |
| Am-KizilUzbe      | 3            | 14376.0     | XXXXXX                    |
| La-OgenBul        | 3            | 16426.3     | XXXXXX                    |
| Can-SucrFran      | 3            | 18160.0     | XXXXXXX                   |
| Can-TopUSA        | 3            | 18581.0     | XXXXXXX                   |

|               |   |         |          |
|---------------|---|---------|----------|
| Con-NanChi    | 3 | 24443.0 | XXXXXXXX |
| Am-HassanTur  | 3 | 27498.7 | XXXXXXXX |
| Can-VedFran   | 3 | 33199.0 | XXXXXXXX |
| Can-Ogen2Is   | 3 | 37832.0 | XXXXXXXX |
| Can-NOFran    | 2 | 39498.0 | XXXXXXXX |
| Am-NesviGeor  | 3 | 44051.0 | XXXXXXXX |
| Can-PGRFran   | 3 | 46375.7 | XXXXXXXX |
| Am-AnaFran    | 3 | 46845.0 | XXXXXXXX |
| Dud-QAPMGeorg | 3 | 47403.3 | XXXXXXXX |
| Can-GCHUSA    | 3 | 48332.0 | XXXXXXXX |
| Con-PauPol    | 3 | 52146.7 | XXXXXX   |
| Can-EfJa      | 3 | 53384.0 | XXXXXX   |
| Can-WiUSA     | 3 | 54434.0 | XXXX     |
| In-ComunSp    | 2 | 56631.5 | XXXXXXXX |
| Can-GyFran    | 2 | 57759.0 | XXXXXXXX |
| Can-DulUSA    | 3 | 59618.7 | XXXX     |
| Dud-QPMAfg    | 3 | 62696.3 | XXXX     |
| La-CascaPor   | 2 | 64535.0 | XXXX     |
| La-ErizoSp    | 3 | 66926.7 | XXX      |
| In-LaBolasSp  | 3 | 69075.7 | XX       |
| Con-MielChi   | 3 | 106039. | XX       |
| La-KroFran    | 4 | 131597. | X        |

#### LSD analysis for U.32 per accessions

Method: 95.0 percentage LSD

| <i>accessions</i> | <i>Cases</i> | <i>Mean</i> | <i>Homogeneous groups</i> |
|-------------------|--------------|-------------|---------------------------|
| Ac-SRKSLan        | 3            | 750.0       | X                         |
| Flex-Co20Ind      | 3            | 750.0       | X                         |
| In-HoneyDewUSA    | 3            | 750.0       | X                         |
| Flex-AryaInd      | 3            | 750.0       | X                         |
| Con-BaishChi      | 3            | 750.0       | X                         |
| In-CrabPor        | 2            | 750.0       | XXX                       |
| In-CGBUSA         | 3            | 750.0       | X                         |
| In-PsPiñSp        | 3            | 750.0       | X                         |
| Con-GMJJa         | 3            | 750.0       | X                         |
| Con-FreeCJa       | 3            | 750.0       | X                         |
| In-AmCañSp        | 3            | 750.0       | X                         |
| Con-ShiroJa       | 3            | 750.0       | X                         |
| Tibish-Ksud       | 3            | 750.0       | X                         |
| In-AmAoroSp       | 2            | 750.0       | XXX                       |
| In-BBredSp        | 3            | 750.0       | X                         |
| Ac-TGR1551Zimb    | 3            | 750.0       | X                         |
| Ac-SVIIInd        | 2            | 750.0       | XXX                       |
| In-RoMoch1Sp      | 3            | 750.0       | X                         |
| Ag-WChInd         | 3            | 750.0       | X                         |
| Con-SCKo          | 3            | 2096.0      | X                         |
| chate-CarIta      | 1            | 3316.0      | XXXXX                     |
| Can-NCFran        | 2            | 4326.0      | XXX                       |
| Con-NanChi        | 3            | 6853.67     | X                         |
| In-TDewUSA        | 3            | 8331.67     | X                         |
| Ag-CallInd        | 3            | 14828.3     | X                         |
| Chi-VellInd       | 3            | 16493.0     | X                         |
| Con-MielChi       | 3            | 19633.3     | X                         |
| In-TeSp           | 3            | 23542.3     | X                         |
| In-TeNinvSp       | 2            | 24232.5     | XXX                       |
| In-LaEscrSp       | 2            | 25143.0     | XXX                       |



|               |   |           |          |
|---------------|---|-----------|----------|
| In-BBescrSp   | 3 | 28203.7   | XX       |
| Ag-TendSud    | 3 | 29645.3   | XX       |
| Can-PearlJa   | 3 | 29846.3   | XX       |
| Can-EanaHun   | 3 | 30469.0   | XX       |
| Con-PauPol    | 3 | 37219.3   | XX       |
| Am-TokTaj     | 3 | 51303.0   | XX       |
| Ag-15591Gha   | 3 | 73531.7   | XX       |
| La-ErizoSp    | 3 | 85366.7   | XX       |
| Can-Ogen2Is   | 3 | 88360.0   | XX       |
| In-TeNinvSp2  | 2 | 98222.0   | XXXX     |
| Can-GCHUSA    | 3 | 103301.   | XX       |
| In-ComunSp    | 2 | 133020.   | XXXX     |
| Am-KizilUzbe  | 3 | 133151.   | XXX      |
| Am-KafEgy     | 2 | 151922.   | XXXX     |
| Can-TopUSA    | 3 | 179408.   | XXX      |
| Can-EfJa      | 3 | 189404.   | XXX      |
| Can-HBJUSA    | 3 | 201445.   | XXX      |
| Ac-G22843Se   | 3 | 208155.   | XXX      |
| Dud-QPMAfg    | 3 | 216542.   | XXXX     |
| Am-YokIs      | 2 | 241448.   | XXXXX    |
| La-OgenBul    | 3 | 276128.   | XXXX     |
| In-LaBolasSp  | 3 | 425797.   | XXXXXX   |
| Am-AnaFran    | 3 | 467985.   | XXXXXXX  |
| Mom-MR1Ind    | 3 | 637785.   | XXXXXXXX |
| Am-HassanTur  | 3 | 676272.   | XXXXXXXX |
| Can-SemUSA    | 2 | 684745.   | XXXXXXXX |
| Can-VedFran   | 3 | 712834.   | XXXXXXXX |
| Dud-QAPMGeorg | 3 | 730827.   | XXXXXXXX |
| Mom-KhaInd    | 3 | 734052.   | XXXXXXXX |
| Can-SucrFran  | 3 | 801669.   | XXXXXXXX |
| Flex-SnakeSA  | 3 | 914850.   | XXXXXXXX |
| La-ZatIta     | 3 | 1.00785E6 | XXXXXXXX |
| Can-PGRFran   | 3 | 1.07826E6 | XXXXXXXX |
| Can-WiUSA     | 3 | 1.16849E6 | XXXXXX   |
| Am-NesviGeor  | 3 | 1.2662E6  | XXXXXX   |
| Mom-PII24Ind  | 3 | 1.38118E6 | XXXX     |
| Am-korcaRus   | 3 | 1.49138E6 | XXX      |
| Can-NOFran    | 2 | 1.69E6    | XX       |
| La-KroFran    | 4 | 2.2192E6  | X        |
| Can-DulUSA    | 3 | 3.60623E6 | X        |
| La-CascaPor   | 2 | 3.95169E6 | X        |
| Can-GyFran    | 2 | 4.22736E6 | X        |

#### LSD analysis for U.33 per accessions

Method: 95.0 percentage LSD

| <i>accessions</i> | <i>Cases</i> | <i>Mean</i> | <i>Homogeneous groups</i> |
|-------------------|--------------|-------------|---------------------------|
| Tibish-Ksud       | 3            | 750.0       | X                         |
| Mom-PII24Ind      | 3            | 750.0       | X                         |
| Can-WiUSA         | 3            | 750.0       | X                         |
| Con-NanChi        | 3            | 750.0       | X                         |
| Con-FreeCJa       | 3            | 750.0       | X                         |
| Con-PauPol        | 3            | 750.0       | X                         |
| Con-MielChi       | 3            | 750.0       | X                         |
| In-HoneyDewUSA    | 3            | 750.0       | X                         |
| Con-SCKo          | 3            | 750.0       | X                         |
| In-BBredSp        | 3            | 750.0       | X                         |

|                |   |         |   |
|----------------|---|---------|---|
| Con-ShiroJa    | 3 | 750.0   | X |
| Can-EanaHun    | 3 | 750.0   | X |
| In-LaEscrSp    | 2 | 750.0   | X |
| Can-HBJUSA     | 3 | 750.0   | X |
| In-TeSp        | 3 | 750.0   | X |
| Con-GMJJa      | 3 | 750.0   | X |
| Ac-SVIIInd     | 2 | 750.0   | X |
| Ac-SRKSLan     | 3 | 750.0   | X |
| Ac-TGR1551Zimb | 3 | 750.0   | X |
| Flex-SnakeSA   | 3 | 750.0   | X |
| In-CrabPor     | 2 | 750.0   | X |
| Can-NCFran     | 2 | 750.0   | X |
| La-ZatIta      | 3 | 750.0   | X |
| In-TeNinvSp2   | 2 | 750.0   | X |
| La-ErizoSp     | 3 | 750.0   | X |
| In-AmCañSp     | 3 | 750.0   | X |
| In-RoMoch1Sp   | 3 | 750.0   | X |
| In-TDewUSA     | 3 | 750.0   | X |
| In-AmAoroSp    | 2 | 750.0   | X |
| Con-BaishChi   | 3 | 750.0   | X |
| Can-TopUSA     | 3 | 765.667 | X |
| Can-PearlJa    | 3 | 772.667 | X |
| Mom-KhaInd     | 3 | 798.0   | X |
| In-BBescrSp    | 3 | 799.333 | X |
| In-TeNinvSp    | 2 | 804.5   | X |
| La-OgenBul     | 3 | 813.333 | X |
| Ac-G22843Se    | 3 | 821.0   | X |
| Ag-CallInd     | 3 | 829.333 | X |
| Chi-VellInd    | 3 | 854.0   | X |
| In-PsPiñSp     | 3 | 868.667 | X |
| Ag-WChInd      | 3 | 890.0   | X |
| Flex-Co20Ind   | 3 | 929.0   | X |
| Am-YokIs       | 2 | 1039.0  | X |
| Ag-TendSud     | 3 | 1061.0  | X |
| chate-Carlta   | 1 | 1240.0  | X |
| In-CGBUSA      | 3 | 1249.0  | X |
| Can-SemUSA     | 2 | 1367.5  | X |
| Ag-15591Gha    | 3 | 1441.0  | X |
| Flex-AryaInd   | 3 | 1623.0  | X |
| Am-KizilUzbe   | 3 | 4329.33 | X |
| Am-KafEgy      | 2 | 5527.5  | X |
| Mom-MR1Ind     | 3 | 7177.67 | X |
| Am-HassanTur   | 3 | 7895.33 | X |
| Am-TokTaj      | 3 | 8100.33 | X |
| Can-EfJa       | 3 | 8364.67 | X |
| Can-SucrFran   | 3 | 8598.0  | X |
| Can-VedFran    | 3 | 8904.33 | X |
| In-LaBolasSp   | 3 | 11361.0 | X |
| Can-GCHUSA     | 3 | 16359.0 | X |
| In-ComunSp     | 2 | 17306.0 | X |
| Am-korcaRus    | 3 | 17646.7 | X |
| Can-DulUSA     | 3 | 19149.7 | X |
| Can-NOFran     | 2 | 24233.0 | X |
| Dud-QPMAfg     | 3 | 27454.3 | X |
| Dud-QAPMGeorg  | 3 | 29923.3 | X |
| Can-Ogen2Is    | 3 | 42679.3 | X |
| Am-AnaFran     | 3 | 48335.0 | X |

|              |   |         |   |
|--------------|---|---------|---|
| Can-PGRFran  | 3 | 55183.0 | X |
| Am-NesviGeor | 3 | 78989.0 | X |
| Can-GyFran   | 2 | 90766.5 | X |
| La-CascaPor  | 2 | 208684. | X |
| La-KroFran   | 4 | 274927. | X |

#### LSD analysis for U.34 per accessions

Method: 95.0 percentage LSD

| <i>accessions</i> | <i>Cases</i> | <i>Mean</i> | <i>Homogeneous groups</i> |
|-------------------|--------------|-------------|---------------------------|
| Ac-SRKSLan        | 3            | 750.0       | X                         |
| Con-ShiroJa       | 3            | 750.0       | X                         |
| Flex-AryaInd      | 3            | 750.0       | X                         |
| In-AmCañSp        | 3            | 750.0       | X                         |
| Ag-15591Gha       | 3            | 750.0       | X                         |
| In-BBredSp        | 3            | 750.0       | X                         |
| Flex-Co20Ind      | 3            | 750.0       | X                         |
| Can-NCFran        | 2            | 750.0       | XX                        |
| In-BBscrSp        | 3            | 750.0       | X                         |
| In-RoMoch1Sp      | 3            | 750.0       | X                         |
| Ac-SVIIInd        | 2            | 750.0       | XX                        |
| In-CrabPor        | 2            | 750.0       | XX                        |
| Con-BaishChi      | 3            | 750.0       | X                         |
| In-CGBUSA         | 3            | 750.0       | X                         |
| In-LaEscrSp       | 2            | 750.0       | XX                        |
| In-PsPiñSp        | 3            | 750.0       | X                         |
| Can-EanaHun       | 3            | 750.0       | X                         |
| In-AmAoroSp       | 2            | 750.0       | XX                        |
| Tibish-Ksud       | 3            | 750.0       | X                         |
| In-HoneyDewUSA    | 3            | 750.0       | X                         |
| Am-KafEgy         | 2            | 750.0       | XX                        |
| In-TeNinvSp       | 2            | 750.0       | XX                        |
| Am-KizilUzbe      | 3            | 750.0       | X                         |
| Can-Ogen2Is       | 3            | 750.0       | X                         |
| Ag-CallInd        | 3            | 750.0       | X                         |
| In-TeSp           | 3            | 750.0       | X                         |
| Con-FreeCJa       | 3            | 750.0       | X                         |
| Am-TokTaj         | 3            | 750.0       | X                         |
| La-OgenBul        | 3            | 750.0       | X                         |
| Ac-TGR1551Zimb    | 3            | 750.0       | X                         |
| In-TeNinvSp2      | 2            | 750.0       | XX                        |
| In-TDewUSA        | 3            | 750.0       | X                         |
| chate-Carlta      | 1            | 750.0       | XXX                       |
| Ag-WChInd         | 3            | 750.0       | X                         |
| Con-GMJJa         | 3            | 750.0       | X                         |
| Con-MielChi       | 3            | 750.0       | X                         |
| Con-NanChi        | 3            | 750.0       | X                         |
| In-ComunSp        | 2            | 750.0       | XX                        |
| Con-SCKo          | 3            | 750.0       | X                         |
| La-ErizoSp        | 3            | 770.0       | X                         |
| Am-YokIs          | 2            | 811.0       | XX                        |
| Chi-VellInd       | 3            | 917.667     | X                         |
| Am-AnaFran        | 3            | 1140.67     | X                         |
| Con-PauPol        | 3            | 2279.33     | X                         |
| Can-EfJa          | 3            | 2335.33     | X                         |
| Dud-QPMAfg        | 3            | 2731.67     | X                         |
| Can-GCHUSA        | 3            | 2910.33     | X                         |

|               |   |           |      |
|---------------|---|-----------|------|
| Mom-KhaInd    | 3 | 3359.33   | X    |
| Ag-TendSud    | 3 | 4260.33   | XX   |
| In-LaBolasSp  | 3 | 5152.0    | XX   |
| Flex-SnakeSA  | 3 | 5638.67   | XX   |
| Can-TopUSA    | 3 | 6026.67   | XX   |
| Ac-G22843Se   | 3 | 6515.67   | XX   |
| Can-PearlJa   | 3 | 6592.0    | XX   |
| La-ZatIta     | 3 | 6895.67   | XX   |
| Can-HBJUSA    | 3 | 10942.0   | XX   |
| Mom-MR1Ind    | 3 | 15181.3   | XXX  |
| Am-HassanTur  | 3 | 16106.3   | XXX  |
| Am-korcaRus   | 3 | 18537.3   | XXX  |
| Dud-QAPMGeorg | 3 | 38991.3   | XXX  |
| Can-PGRFran   | 3 | 39157.7   | XXX  |
| Mom-PII24Ind  | 3 | 40429.3   | XXX  |
| Can-VedFran   | 3 | 44394.0   | XXX  |
| Can-SemUSA    | 2 | 54395.5   | XXXX |
| La-CascaPor   | 2 | 71690.0   | XXXX |
| Can-NOFran    | 2 | 79179.5   | XXX  |
| Can-WiUSA     | 3 | 108155.   | XX   |
| Can-SucrFran  | 3 | 115482.   | XX   |
| La-KroFran    | 4 | 132991.   | X    |
| Am-NesviGeor  | 3 | 139007.   | XX   |
| Can-DulUSA    | 3 | 192681.   | X    |
| Can-GyFran    | 2 | 1.58274E6 | X    |

#### LSD analysis for U.35 per accessions

Method: 95.0 percentage LSD

| <i>accessions</i> | <i>Cases</i> | <i>Mean</i> | <i>Homogeneous groups</i> |
|-------------------|--------------|-------------|---------------------------|
| In-AmAoroSp       | 2            | 750.0       | X                         |
| Flex-SnakeSA      | 3            | 750.0       | X                         |
| Am-KizilUzbe      | 3            | 750.0       | X                         |
| In-CrabPor        | 2            | 750.0       | X                         |
| Can-PGRFran       | 3            | 750.0       | X                         |
| In-PsPiñSp        | 3            | 750.0       | X                         |
| Can-Ogen2Is       | 3            | 750.0       | X                         |
| Can-NOFran        | 2            | 750.0       | X                         |
| Can-TopUSA        | 3            | 750.0       | X                         |
| Can-DulUSA        | 3            | 750.0       | X                         |
| Can-PearlJa       | 3            | 750.0       | X                         |
| La-ZatIta         | 3            | 750.0       | X                         |
| Ag-TendSud        | 3            | 750.0       | X                         |
| In-TeNinvSp       | 2            | 750.0       | X                         |
| Can-VedFran       | 3            | 750.0       | X                         |
| Ac-SVIInd         | 2            | 750.0       | X                         |
| In-CGBUSA         | 3            | 750.0       | X                         |
| Can-SemUSA        | 2            | 750.0       | X                         |
| Can-GCHUSA        | 3            | 750.0       | X                         |
| Ac-TGR1551Zimb    | 3            | 750.0       | X                         |
| Can-HBJUSA        | 3            | 750.0       | X                         |
| Can-NCFran        | 2            | 750.0       | X                         |
| In-TDewUSA        | 3            | 750.0       | X                         |
| In-RoMoch1Sp      | 3            | 750.0       | X                         |
| Tibish-Ksud       | 3            | 750.0       | X                         |
| Con-FreeCJa       | 3            | 750.0       | X                         |
| Am-TokTaj         | 3            | 750.0       | X                         |

|                |   |         |    |
|----------------|---|---------|----|
| Can-SucrFran   | 3 | 750.0   | X  |
| Am-YokIs       | 2 | 750.0   | X  |
| La-CascaPor    | 2 | 750.0   | X  |
| chate-CarIta   | 1 | 750.0   | X  |
| Ac-SRKSLan     | 3 | 750.0   | X  |
| Can-WiUSA      | 3 | 750.0   | X  |
| Ag-WChInd      | 3 | 750.0   | X  |
| Can-EanaHun    | 3 | 750.0   | X  |
| Con-MielChi    | 3 | 750.0   | X  |
| Am-AnaFran     | 3 | 750.0   | X  |
| Mom-KhaInd     | 3 | 750.0   | X  |
| Con-SCKo       | 3 | 750.0   | X  |
| Con-ShiroJa    | 3 | 750.0   | X  |
| Can-GyFran     | 2 | 750.0   | X  |
| Ag-15591Gha    | 3 | 750.0   | X  |
| Flex-AryaInd   | 3 | 750.0   | X  |
| Flex-Co20Ind   | 3 | 750.0   | X  |
| Ag-CallInd     | 3 | 1049.33 | X  |
| Con-GMJJa      | 3 | 1089.67 | X  |
| Con-BaishChi   | 3 | 1202.67 | X  |
| Can-EfJa       | 3 | 1216.33 | X  |
| La-KroFran     | 4 | 1278.25 | X  |
| Dud-QPMAfg     | 3 | 2086.0  | X  |
| In-AmCañSp     | 3 | 2337.67 | X  |
| Con-NanChi     | 3 | 2395.67 | X  |
| Mom-PII24Ind   | 3 | 2933.0  | X  |
| In-TeSp        | 3 | 3010.67 | X  |
| Dud-QAPMGeorg  | 3 | 3212.33 | X  |
| In-BBredSp     | 3 | 3294.0  | X  |
| In-HoneyDewUSA | 3 | 5407.33 | X  |
| In-TeNinvSp2   | 2 | 8458.0  | X  |
| In-LaEscrSp    | 2 | 10662.0 | X  |
| Mom-MR1Ind     | 3 | 19913.3 | X  |
| Am-korcaRus    | 3 | 26151.7 | X  |
| Am-NesviGeor   | 3 | 26382.0 | X  |
| Con-PauPol     | 3 | 28536.3 | X  |
| Am-KafEgy      | 2 | 46338.5 | X  |
| Chi-VellInd    | 3 | 47292.7 | X  |
| Ac-G22843Se    | 3 | 52627.7 | X  |
| Am-HassanTur   | 3 | 72622.0 | X  |
| La-ErizoSp     | 3 | 109529. | XX |
| In-LaBolasSp   | 3 | 206668. | X  |
| In-ComunSp     | 2 | 231681. | X  |
| La-OgenBul     | 3 | 460766. | X  |
| In-BBescrSp    | 3 | 576748. | X  |

#### LSD analysis for U.36 per accessions

Method: 95.0 percentage LSD

| <i>accessions</i> | <i>Cases</i> | <i>Mean</i> | <i>Homogeneous groups</i> |
|-------------------|--------------|-------------|---------------------------|
| In-TeNinvSp       | 2            | 750.0       | X                         |
| Con-SCKo          | 3            | 750.0       | X                         |
| La-ErizoSp        | 3            | 750.0       | X                         |
| In-AmCañSp        | 3            | 750.0       | X                         |
| Con-ShiroJa       | 3            | 750.0       | X                         |
| Flex-Co20Ind      | 3            | 750.0       | X                         |
| In-CGBUSA         | 3            | 750.0       | X                         |

|                |   |         |     |
|----------------|---|---------|-----|
| Ac-G22843Se    | 3 | 750.0   | X   |
| In-BBredSp     | 3 | 750.0   | X   |
| In-TDewUSA     | 3 | 750.0   | X   |
| Con-BaishChi   | 3 | 750.0   | X   |
| Flex-AryaInd   | 3 | 750.0   | X   |
| In-CrabPor     | 2 | 750.0   | X   |
| Flex-SnakeSA   | 3 | 750.0   | X   |
| In-RoMoch1Sp   | 3 | 750.0   | X   |
| Can-WiUSA      | 3 | 750.0   | X   |
| Can-EanaHun    | 3 | 750.0   | X   |
| Ac-TGR1551Zimb | 3 | 750.0   | X   |
| chate-CarIta   | 1 | 750.0   | XXX |
| In-PsPiñSp     | 3 | 750.0   | X   |
| In-LaEscrSp    | 2 | 750.0   | X   |
| Can-NCFran     | 2 | 750.0   | X   |
| Ac-SVIInd      | 2 | 750.0   | X   |
| Mom-KhaInd     | 3 | 750.0   | X   |
| In-AmAoroSp    | 2 | 750.0   | X   |
| In-BBescrSp    | 3 | 750.0   | X   |
| Tibish-Ksud    | 3 | 750.0   | X   |
| In-HoneyDewUSA | 3 | 750.0   | X   |
| Mom-PII24Ind   | 3 | 750.0   | X   |
| In-TeSp        | 3 | 750.0   | X   |
| Ac-SRKSLan     | 3 | 750.0   | X   |
| In-TeNinvSp2   | 2 | 750.0   | X   |
| Ag-WChInd      | 3 | 750.0   | X   |
| Con-FreeCJa    | 3 | 750.0   | X   |
| Con-GMJJa      | 3 | 750.0   | X   |
| Con-MielChi    | 3 | 750.0   | X   |
| Con-NanChi     | 3 | 750.0   | X   |
| Con-PauPol     | 3 | 750.0   | X   |
| Ag-CallInd     | 3 | 757.0   | X   |
| Can-PearlJa    | 3 | 797.0   | X   |
| Chi-VellInd    | 3 | 839.333 | X   |
| Ag-15591Gha    | 3 | 908.333 | X   |
| Ag-TendSud     | 3 | 992.0   | X   |
| Can-SucrFran   | 3 | 1919.33 | X   |
| In-ComunSp     | 2 | 3167.5  | X   |
| Am-KizilUzbe   | 3 | 4124.0  | X   |
| Am-KafEgy      | 2 | 4795.5  | X   |
| Am-TokTaj      | 3 | 6650.0  | X   |
| La-ZatIta      | 3 | 7276.67 | X   |
| Can-HBJUSA     | 3 | 8691.0  | X   |
| Dud-QPMAfg     | 3 | 8699.67 | X   |
| Can-VedFran    | 3 | 11901.3 | X   |
| In-LaBolasSp   | 3 | 12928.7 | X   |
| Can-NOFran     | 2 | 13922.0 | X   |
| Dud-QAPMGeorg  | 3 | 18090.3 | X   |
| Mom-MR1Ind     | 3 | 18670.3 | X   |
| Am-HassanTur   | 3 | 19514.3 | X   |
| Can-TopUSA     | 3 | 19803.3 | X   |
| La-OgenBul     | 3 | 20907.3 | X   |
| Can-GyFran     | 2 | 21024.0 | X   |
| Am-YokIs       | 2 | 27047.5 | X X |
| Am-NesviGeor   | 3 | 29417.0 | X   |
| Am-korcaRus    | 3 | 37904.0 | X X |
| Can-EfJa       | 3 | 59670.0 | XXX |

|             |   |         |     |
|-------------|---|---------|-----|
| La-KroFran  | 4 | 68639.8 | XXX |
| Can-GCHUSA  | 3 | 71796.0 | XXX |
| Can-Ogen2Is | 3 | 160018. | X X |
| Can-SemUSA  | 2 | 164286. | XXX |
| La-CascaPor | 2 | 209275. | X   |
| Can-PGRFran | 3 | 238073. | X   |
| Can-DulUSA  | 3 | 245718. | X   |
| Am-AnaFran  | 3 | 456783. | X   |

#### LSD analysis for U.37 per accessions

Method: 95.0 percentage LSD

| <i>accessions</i> | <i>Cases</i> | <i>Mean</i> | <i>Homogeneous groups</i> |
|-------------------|--------------|-------------|---------------------------|
| Can-GyFran        | 2            | 6247.0      | XX                        |
| Am-YokIs          | 2            | 6684.0      | XX                        |
| Ac-G22843Se       | 3            | 8115.0      | X                         |
| Ac-SRKSLan        | 3            | 9620.0      | XX                        |
| Mom-MRIInd        | 3            | 11596.3     | XX                        |
| Ag-CallInd        | 3            | 12004.7     | XX                        |
| Can-PGRFran       | 3            | 12263.7     | XX                        |
| In-TDewUSA        | 3            | 12631.7     | XX                        |
| Am-HassanTur      | 3            | 12749.7     | XX                        |
| Ac-SVIInd         | 2            | 12795.0     | XX                        |
| Con-FreeCJa       | 3            | 13732.0     | XX                        |
| Can-HBJUSA        | 3            | 13761.3     | XX                        |
| In-HoneyDewUSA    | 3            | 13807.7     | XX                        |
| Ag-WChInd         | 3            | 14362.0     | XX                        |
| Am-TokTaj         | 3            | 14426.3     | XX                        |
| In-PsPiñSp        | 3            | 14571.7     | XX                        |
| Con-MielChi       | 3            | 14875.7     | XX                        |
| Am-KizilUzbe      | 3            | 15388.7     | XX                        |
| Con-GMJJa         | 3            | 15573.0     | XX                        |
| Ag-TendSud        | 3            | 15723.7     | XX                        |
| Can-SucrFran      | 3            | 16902.0     | XX                        |
| In-AmCañSp        | 3            | 19306.3     | XX                        |
| Can-VedFran       | 3            | 19344.0     | XX                        |
| In-ComunSp        | 2            | 20096.5     | XX                        |
| In-TeNinvSp2      | 2            | 20198.0     | XX                        |
| In-TeSp           | 3            | 20564.3     | XX                        |
| Ag-15591Gha       | 3            | 20796.7     | XX                        |
| Am-AnaFran        | 3            | 21246.0     | XX                        |
| In-CGBUSA         | 3            | 21355.0     | XX                        |
| Chi-VellInd       | 3            | 21610.3     | XX                        |
| Can-NCFran        | 2            | 22117.5     | XX                        |
| Am-korcaRus       | 3            | 22286.7     | XX                        |
| Con-NanChi        | 3            | 23034.7     | XX                        |
| In-TeNinvSp       | 2            | 24465.5     | XX                        |
| La-OgenBul        | 3            | 25661.0     | XX                        |
| Can-SemUSA        | 2            | 26087.5     | XX                        |
| Can-GCHUSA        | 3            | 27167.0     | XX                        |
| Mom-PII24Ind      | 3            | 27315.7     | XX                        |
| In-LaEscrSp       | 2            | 28091.0     | XX                        |
| La-ErizoSp        | 3            | 28146.0     | XX                        |
| Tibish-Ksud       | 3            | 30144.7     | XX                        |
| In-AmAoroSp       | 2            | 30232.5     | XX                        |
| Flex-SnakeSA      | 3            | 30428.3     | XX                        |
| Can-TopUSA        | 3            | 30646.7     | XX                        |

|                |   |         |     |
|----------------|---|---------|-----|
| Mom-KhaInd     | 3 | 31357.3 | XX  |
| In-CrabPor     | 2 | 32346.5 | XX  |
| Flex-Co20Ind   | 3 | 32763.3 | XX  |
| Can-Ogen2Is    | 3 | 32838.0 | XX  |
| Con-ShiroJa    | 3 | 34405.7 | XX  |
| Dud-QAPMGeorg  | 3 | 35051.7 | XX  |
| La-KroFran     | 4 | 37896.3 | XX  |
| Am-NesviGeor   | 3 | 39292.0 | XX  |
| In-BBredSp     | 3 | 39657.3 | XX  |
| Am-KafEgy      | 2 | 39906.0 | XX  |
| In-RoMoch1Sp   | 3 | 41776.3 | XX  |
| In-LaBolasSp   | 3 | 44386.0 | XX  |
| Ac-TGR1551Zimb | 3 | 47518.0 | XX  |
| Can-EanaHun    | 3 | 47889.7 | XX  |
| Can-WiUSA      | 3 | 49993.7 | XX  |
| Con-BaishChi   | 3 | 51122.3 | XX  |
| Can-DulUSA     | 3 | 56034.3 | XX  |
| La-CascaPor    | 2 | 57370.5 | XX  |
| Con-SCKo       | 3 | 58685.3 | XX  |
| Flex-AryaInd   | 3 | 59022.7 | XX  |
| La-ZatIta      | 3 | 71611.3 | XX  |
| In-BBescrSp    | 3 | 79905.7 | XX  |
| Dud-QPMAfg     | 3 | 88884.3 | XX  |
| Can-EfJa       | 3 | 104883. | XX  |
| Con-PauPol     | 3 | 106570. | XX  |
| Can-NOFran     | 2 | 165939. | X   |
| chate-Carlta   | 1 | 196557. | XXX |
| Can-PearlJa    | 3 | 387127. | X   |
